# Supplementary material for: From classification to confirmation: verifying taxonomic classifications by mapping metagenomic reads to reference genomes
Source: Research Square preprint supplement (doi:10.21203/rs.3.rs-8224247/v1), 2025-12-01

**Additional File 5: Tumour samples**

All figures here were generated by the Genome Coverage Checker plotting script. No samples are plotted in full in the main text. For all figures, the following legend applies:

Reference genome coverage of the top 20 most abundant species within the Kraken output. This figure was produced using the Genome Coverage Checker plotting script and shows: (i) the location of Bowtie 2-mapped reads across the length of the reference genomes, as well which regions have higher (yellow) or lower (blue) numbers of mapped reads (left box); (ii) the identity of the mapped reads to the reference genomes (middle box; each point represents the identity of a single read, with boxplots indicating the median and interquartile range and whiskers 1.5 x the interquartile range); and (iii) the number of reads assigned by Kraken to each species, the genome fraction (%) that has mapped reads, and the percentage of Kraken-assigned reads that can be mapped to the genome (right boxes). Cells here are coloured according the minimum or maximum numbers shown within the plot. The NCBI taxonomy ID and species name is shown on the left.


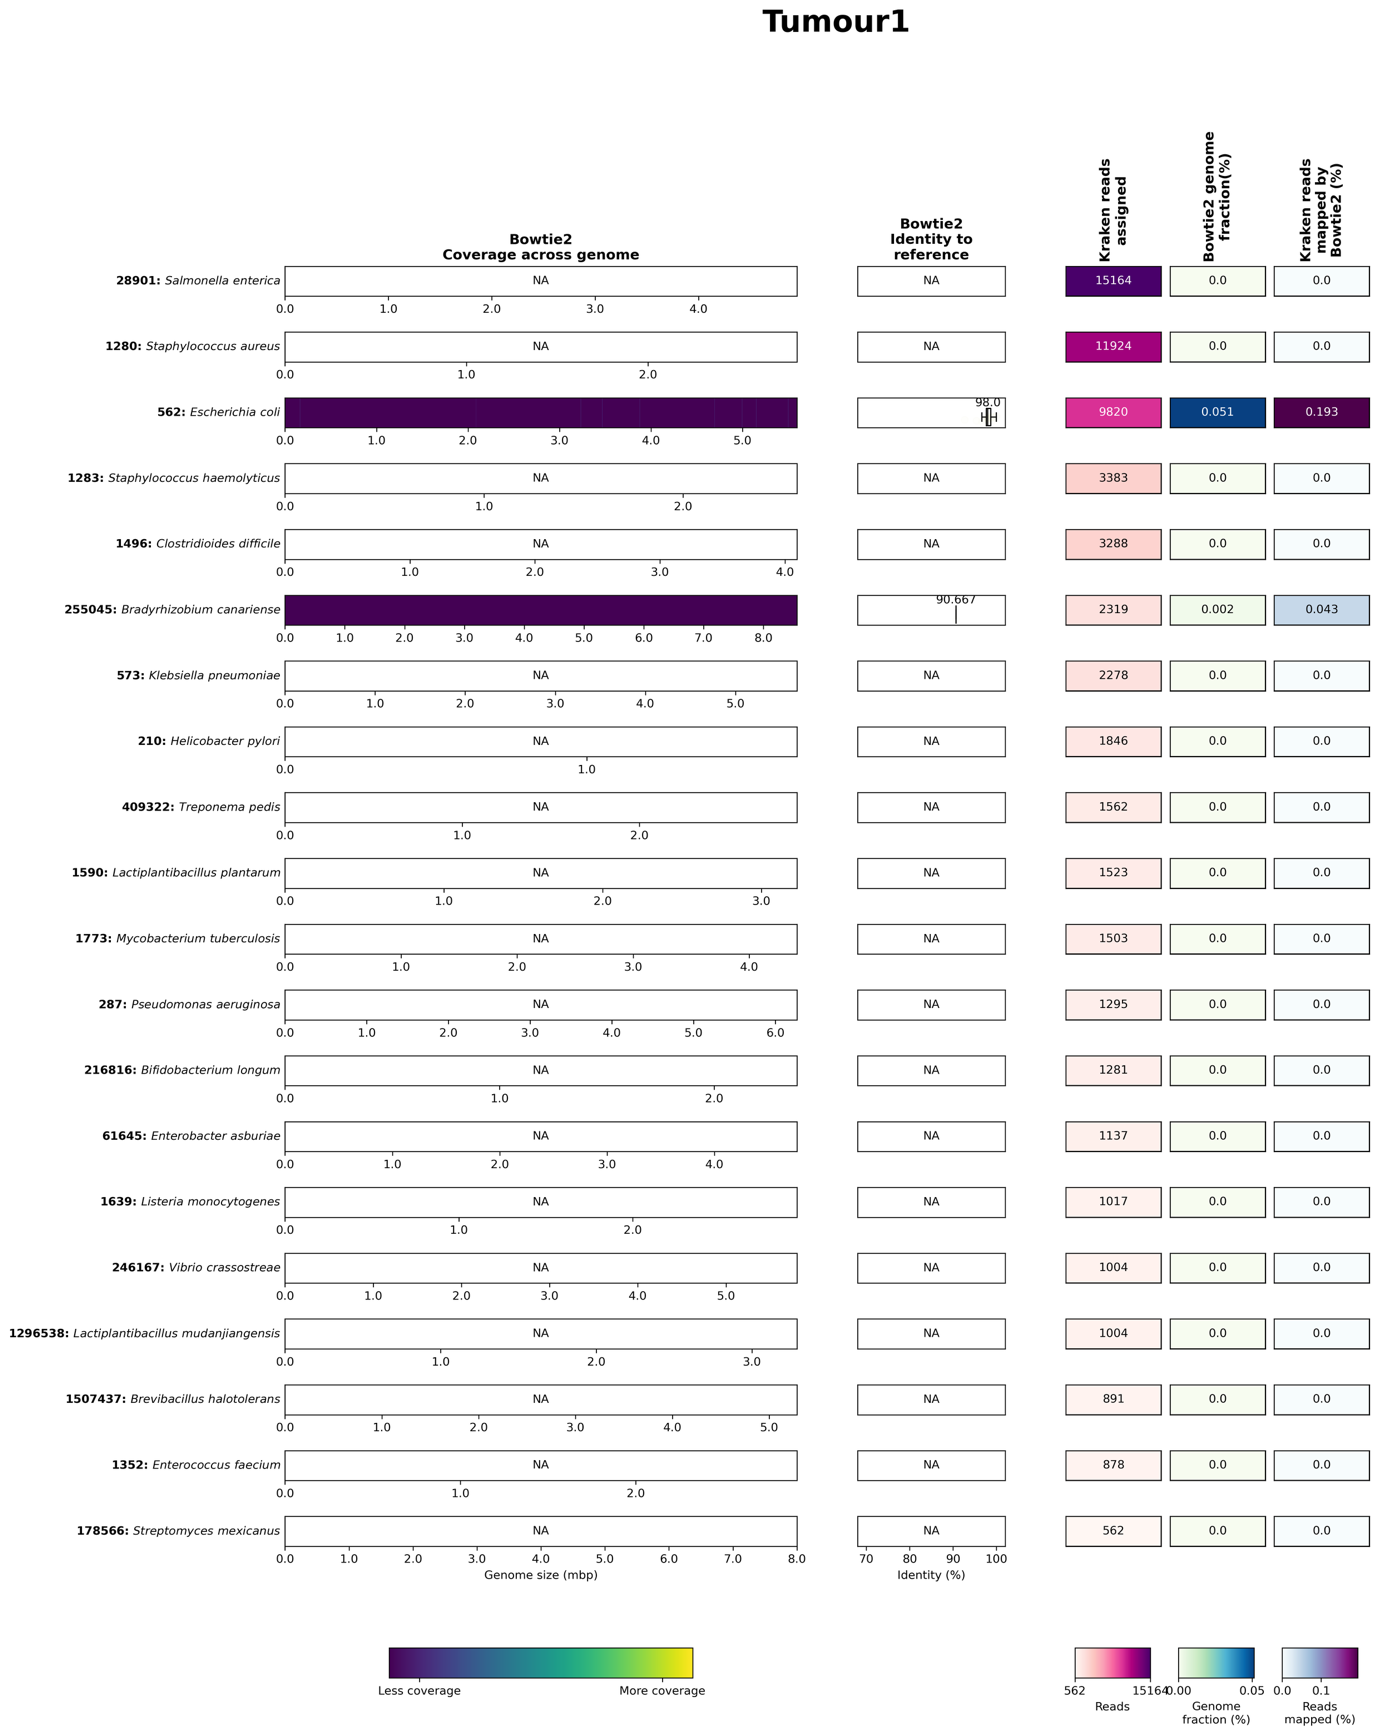


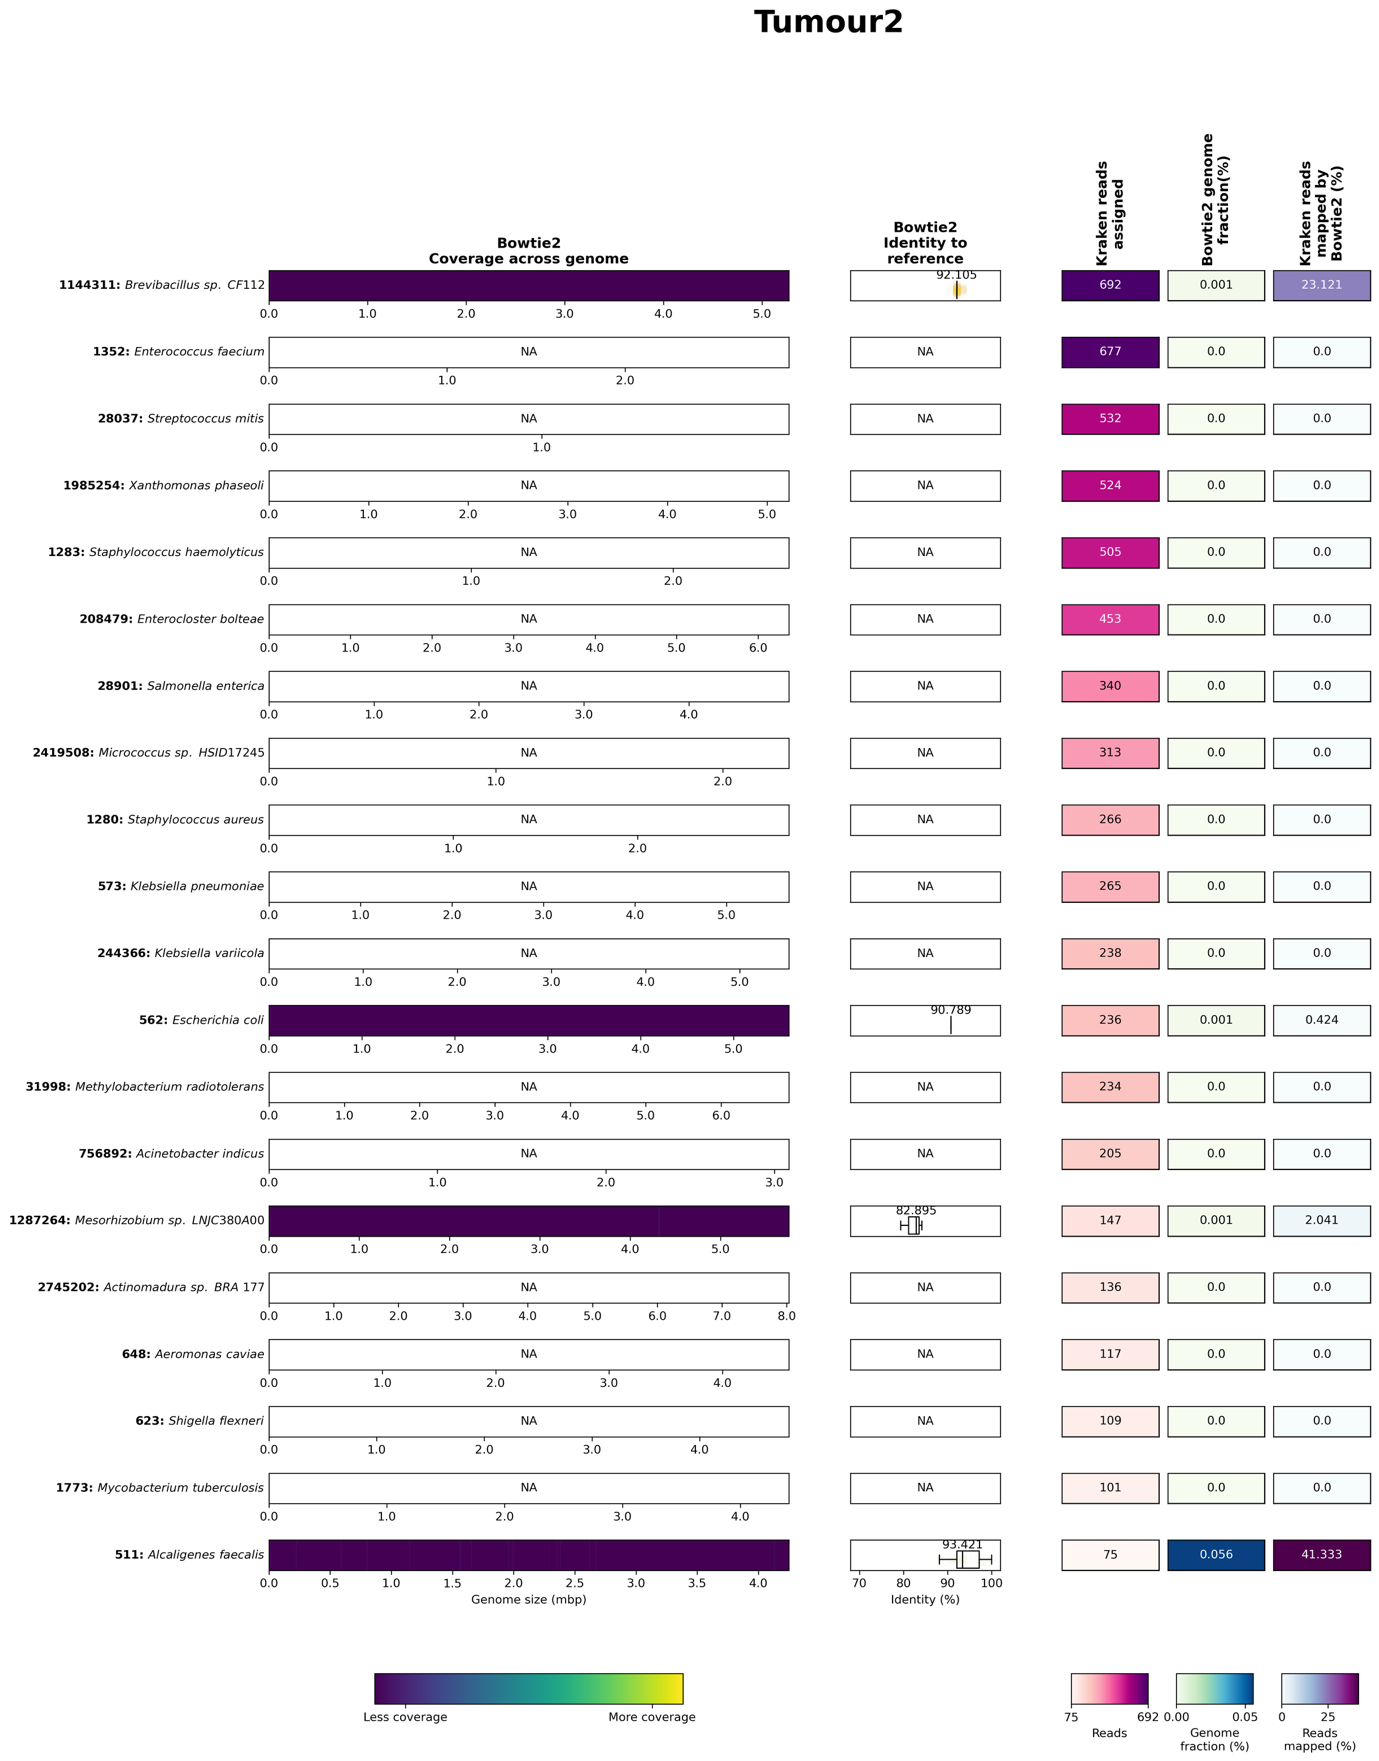


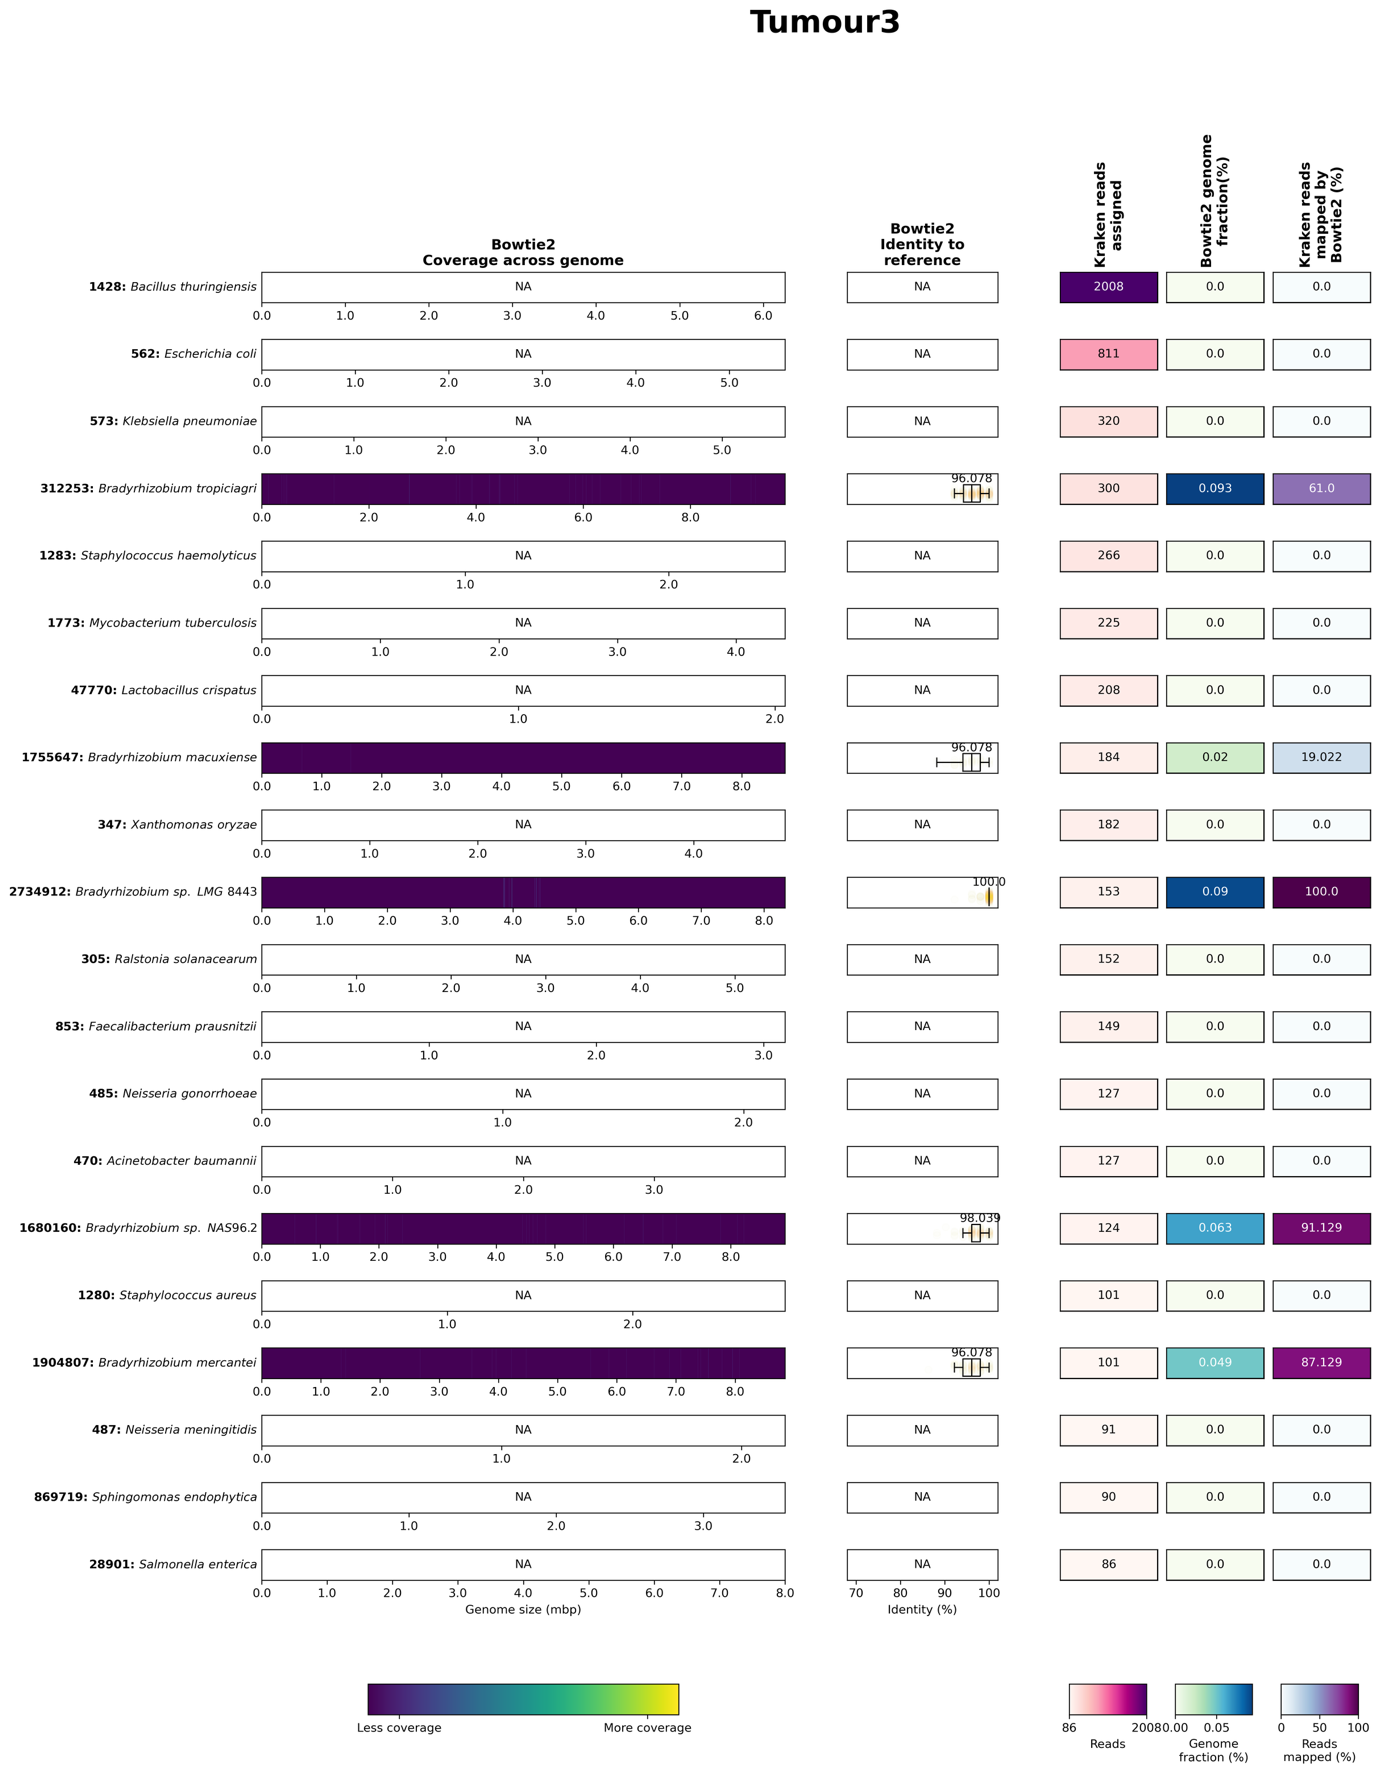


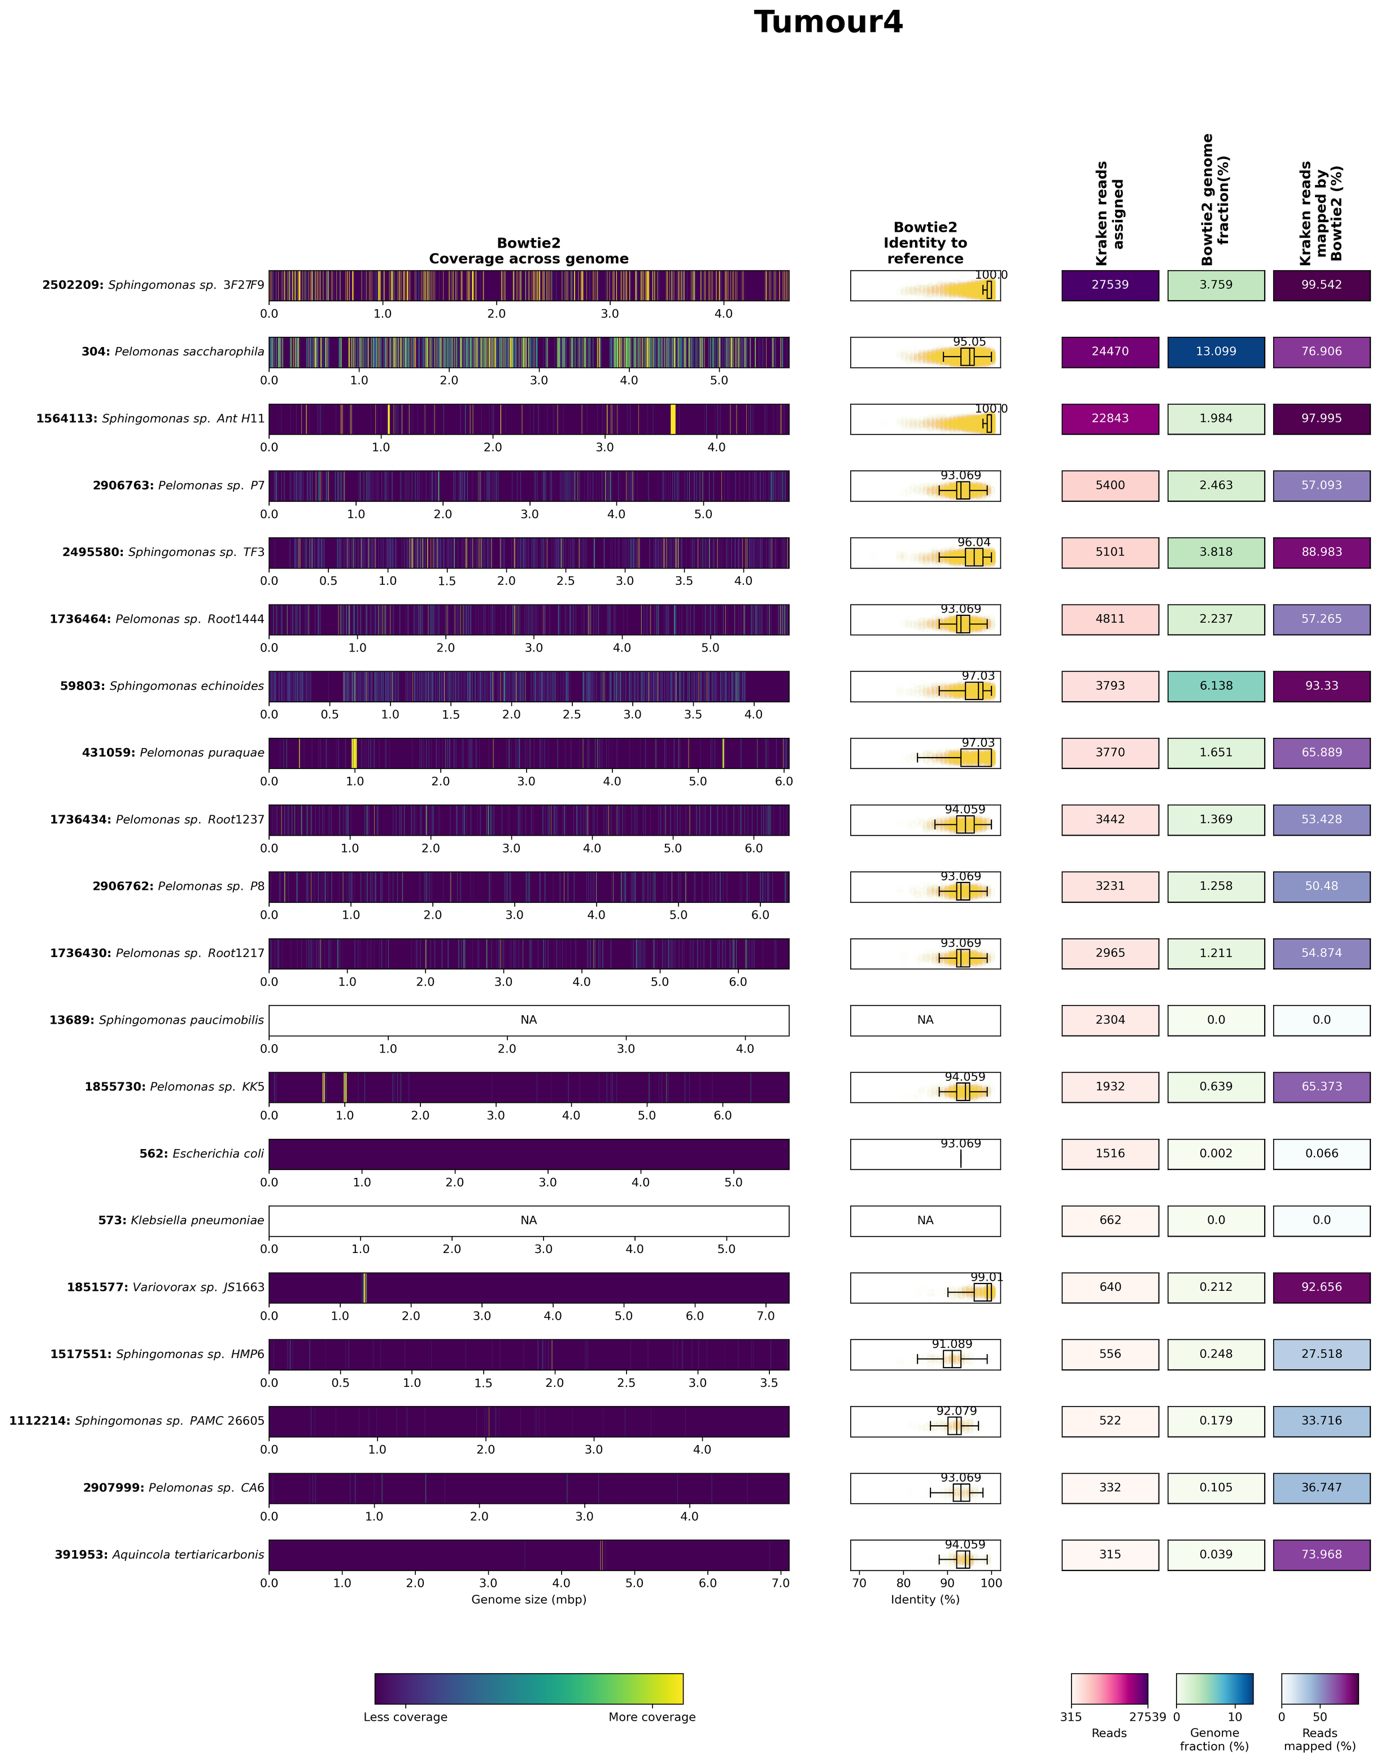


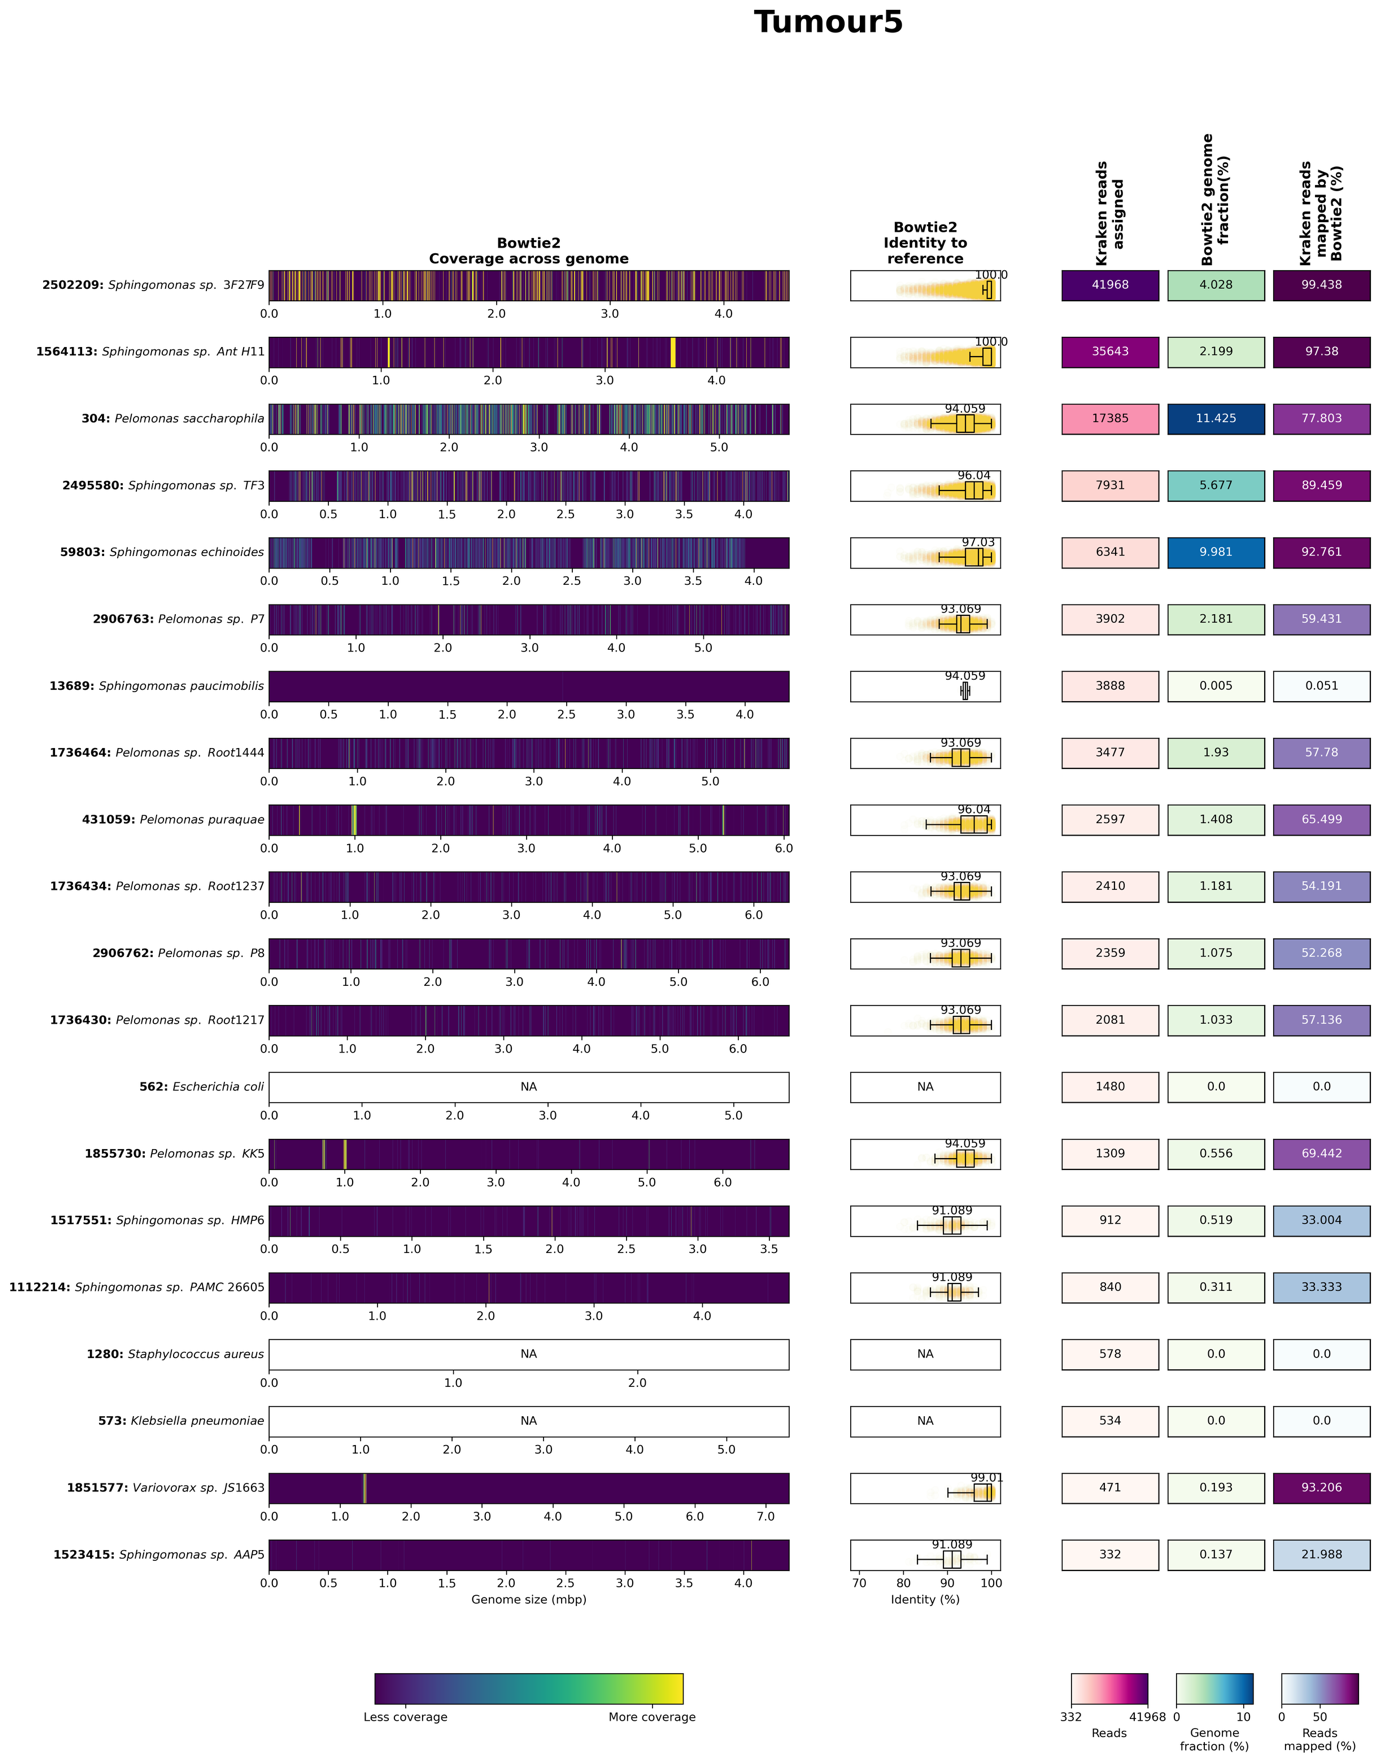


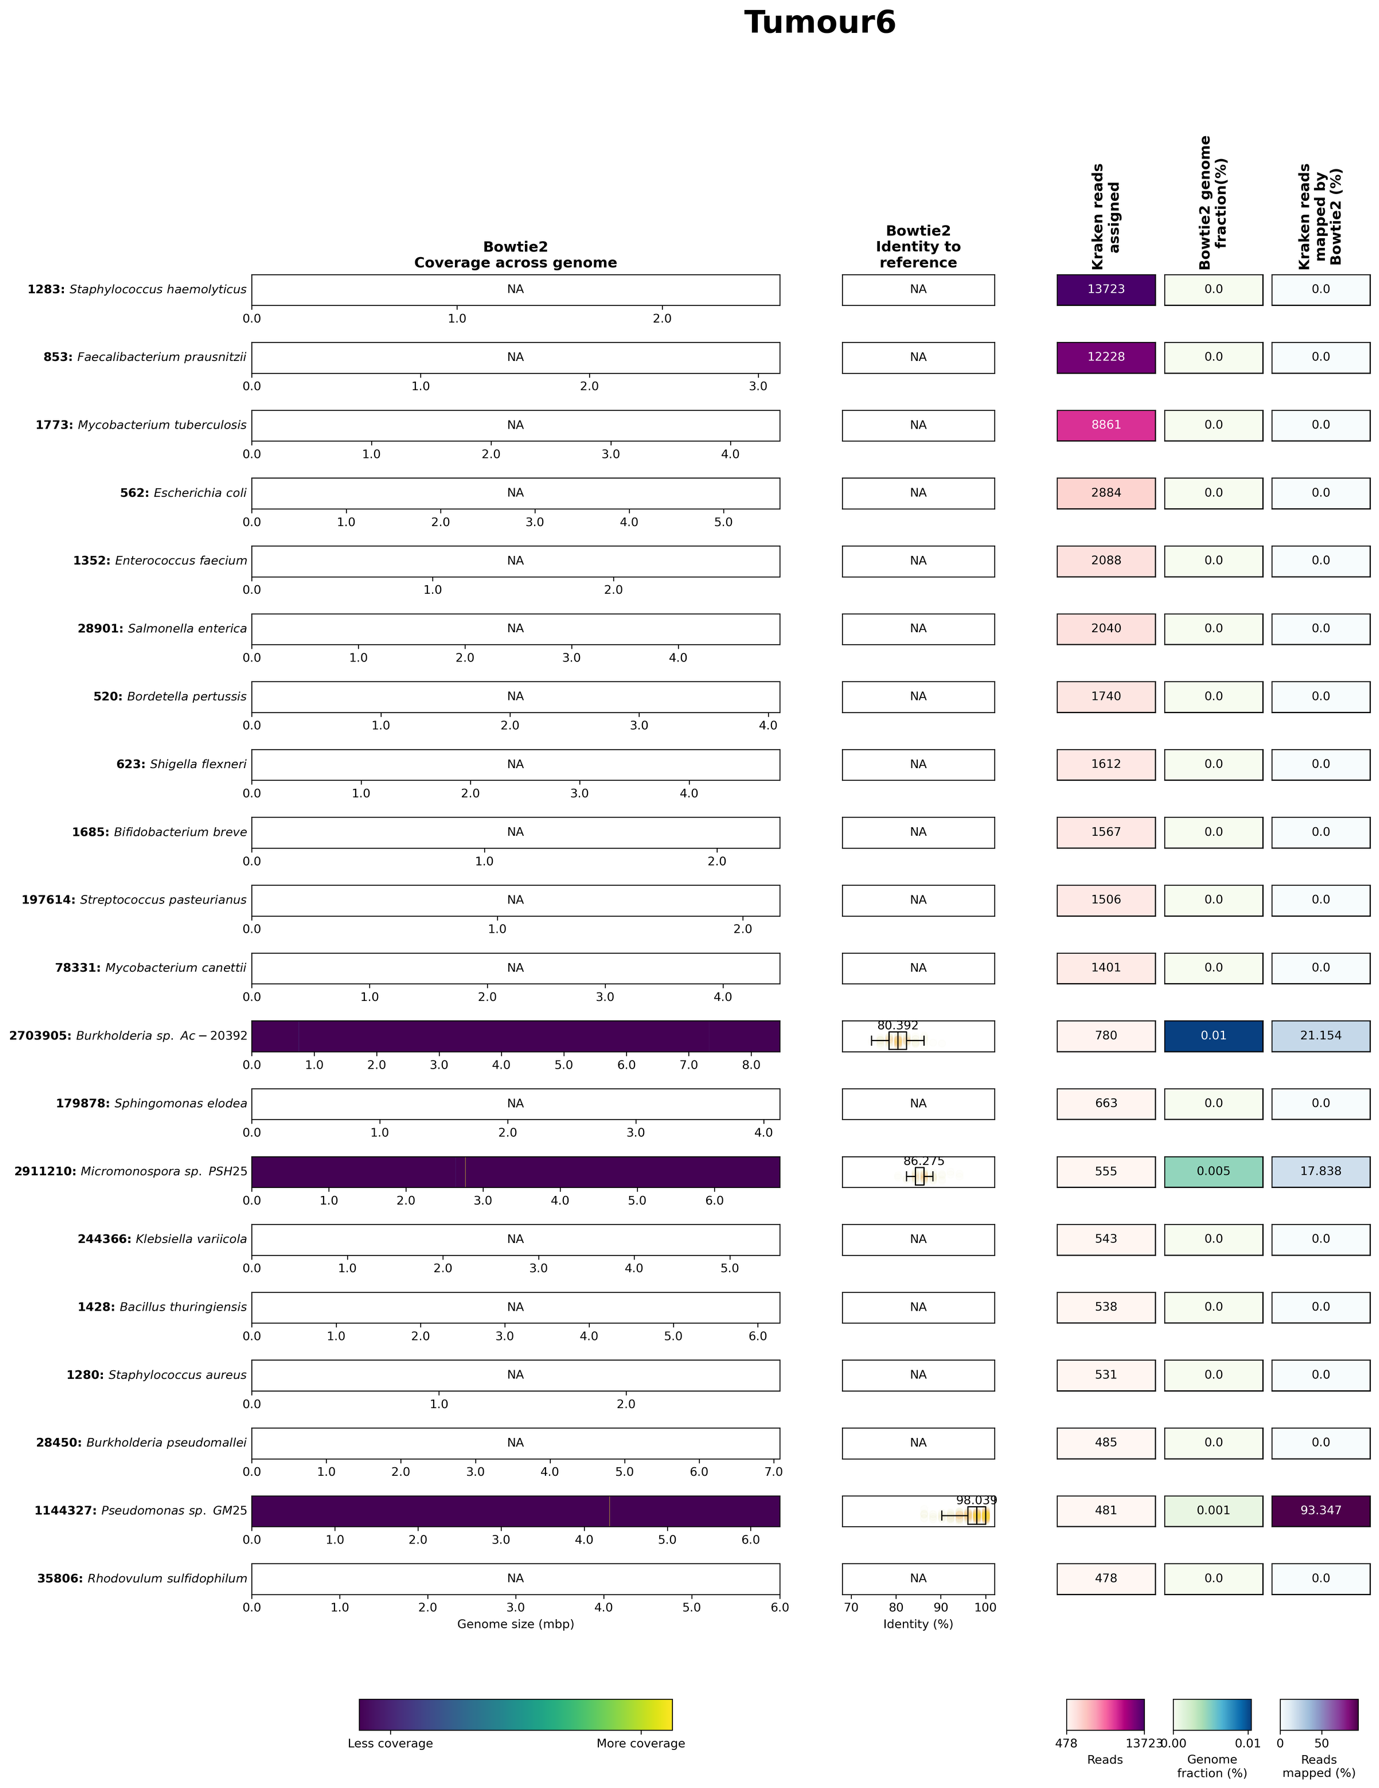


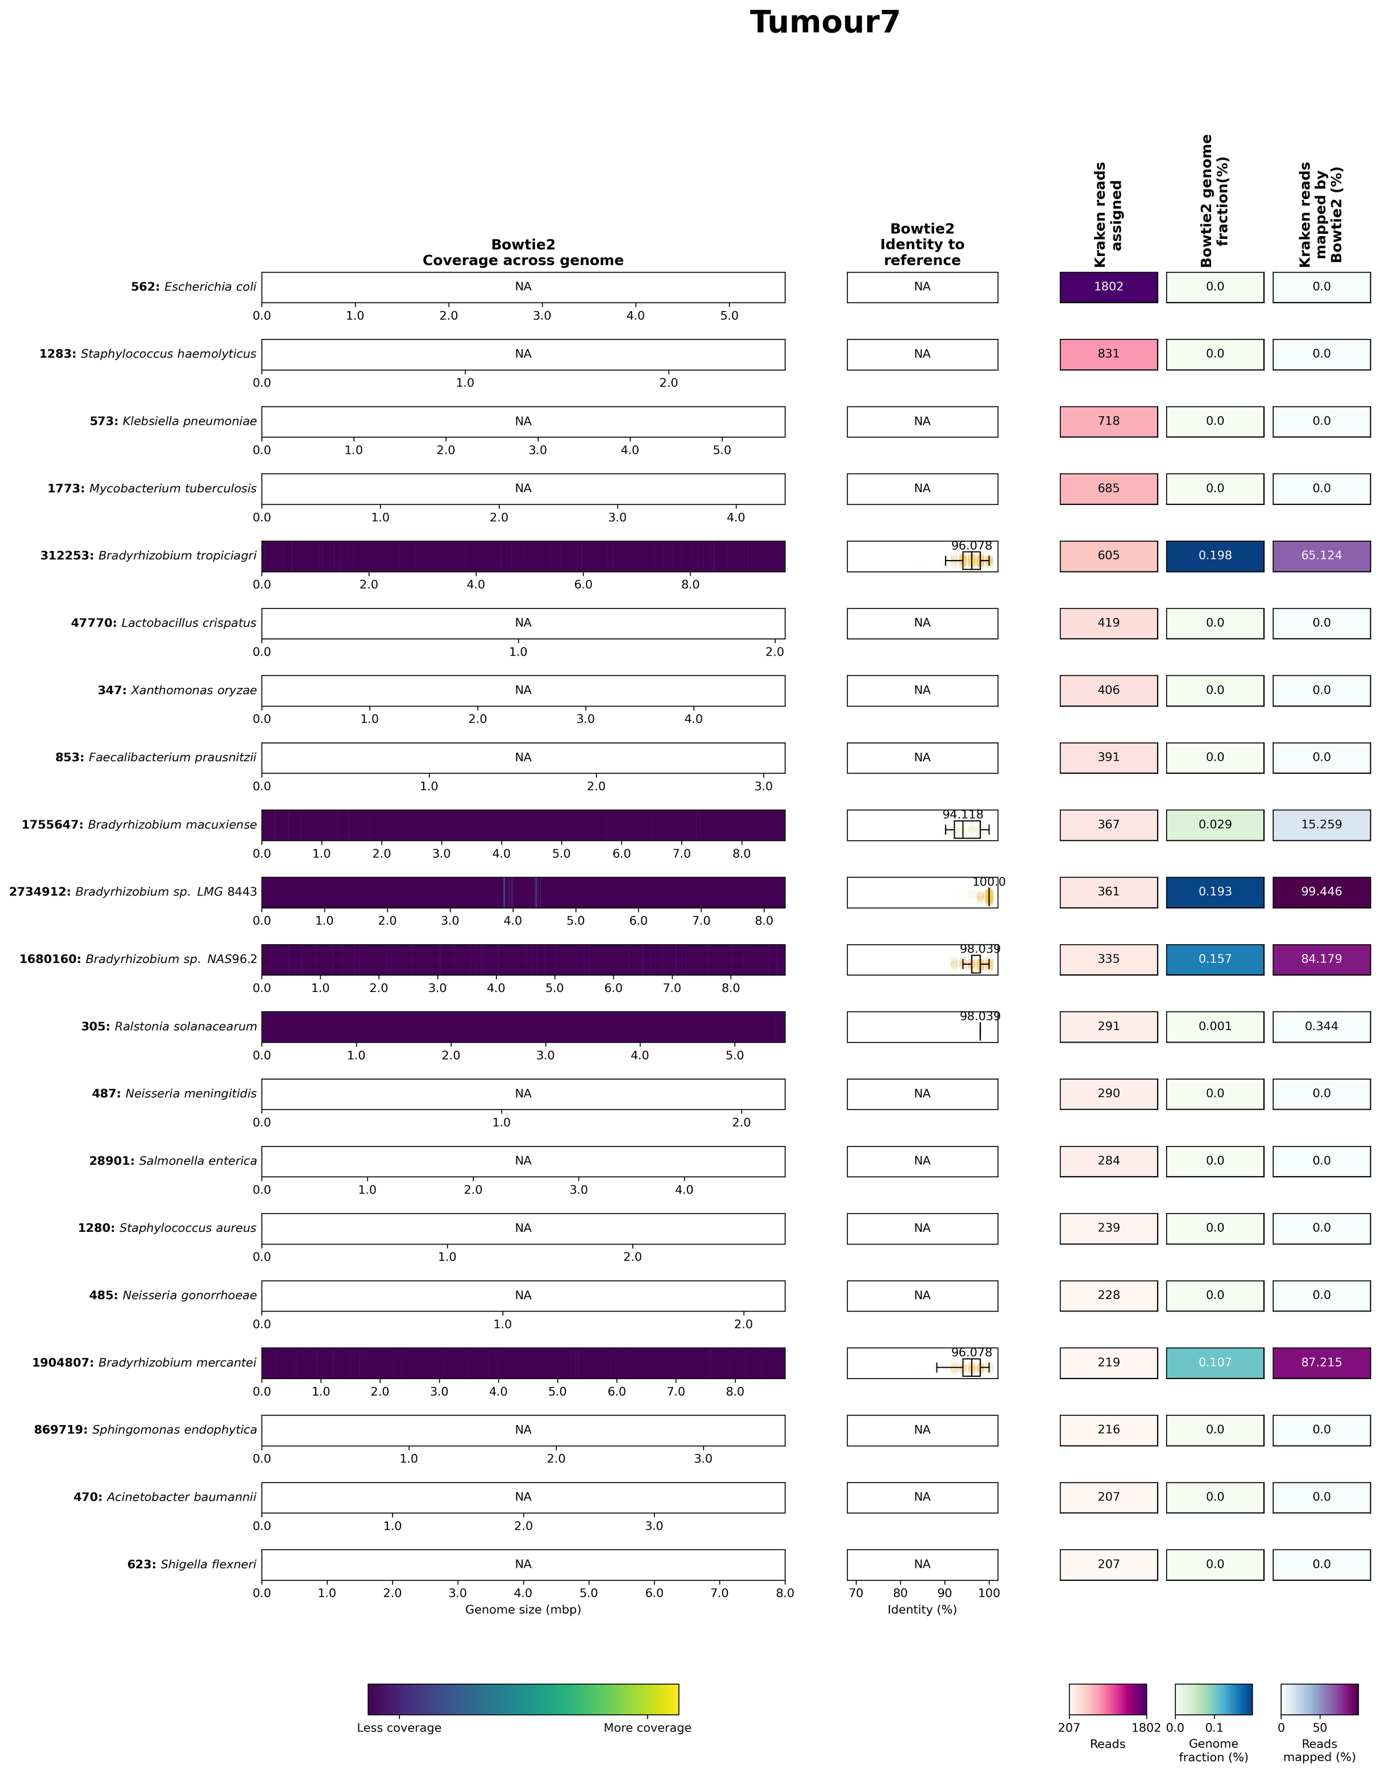


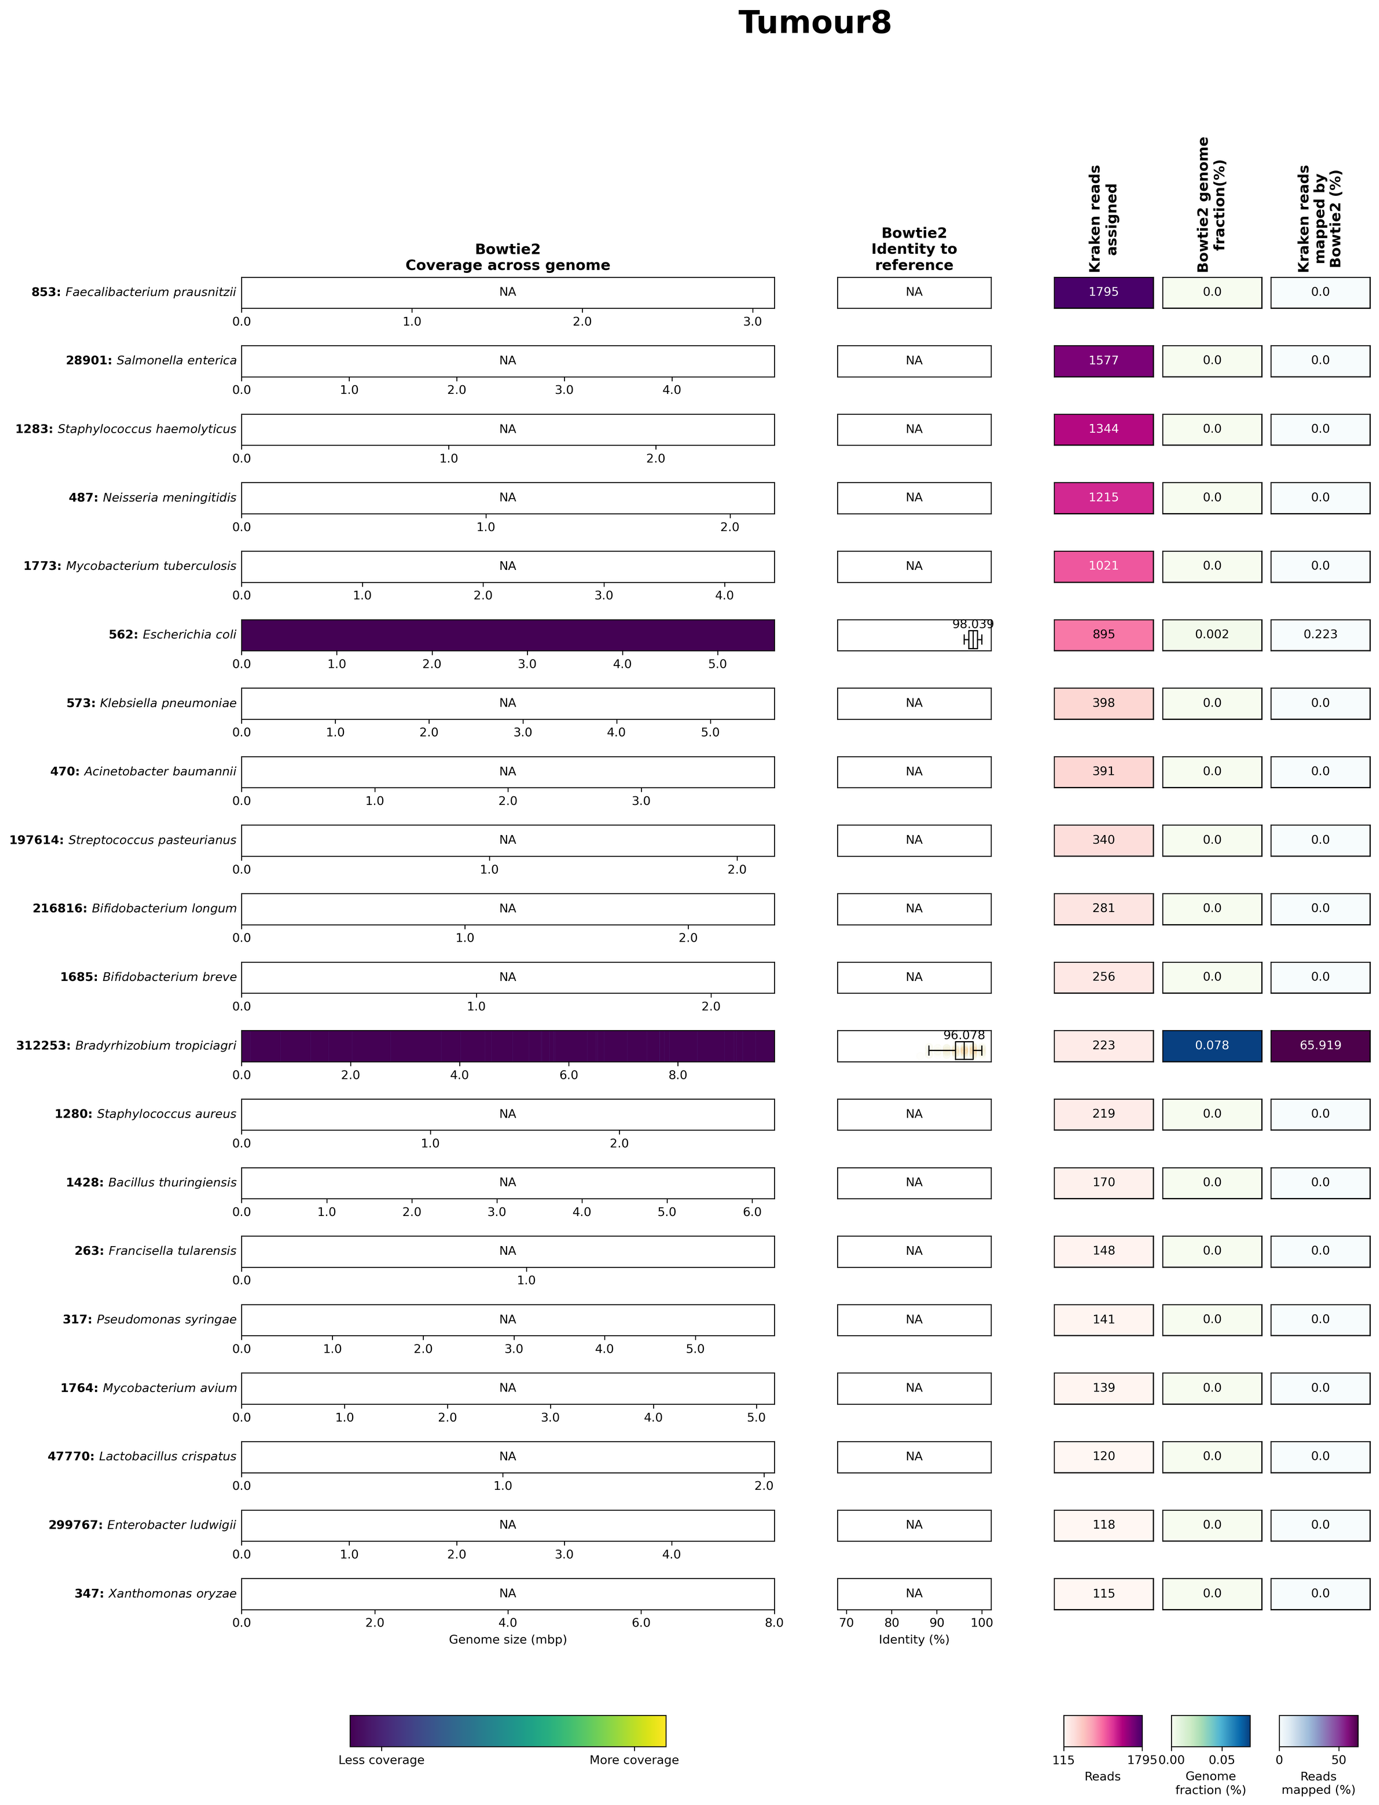


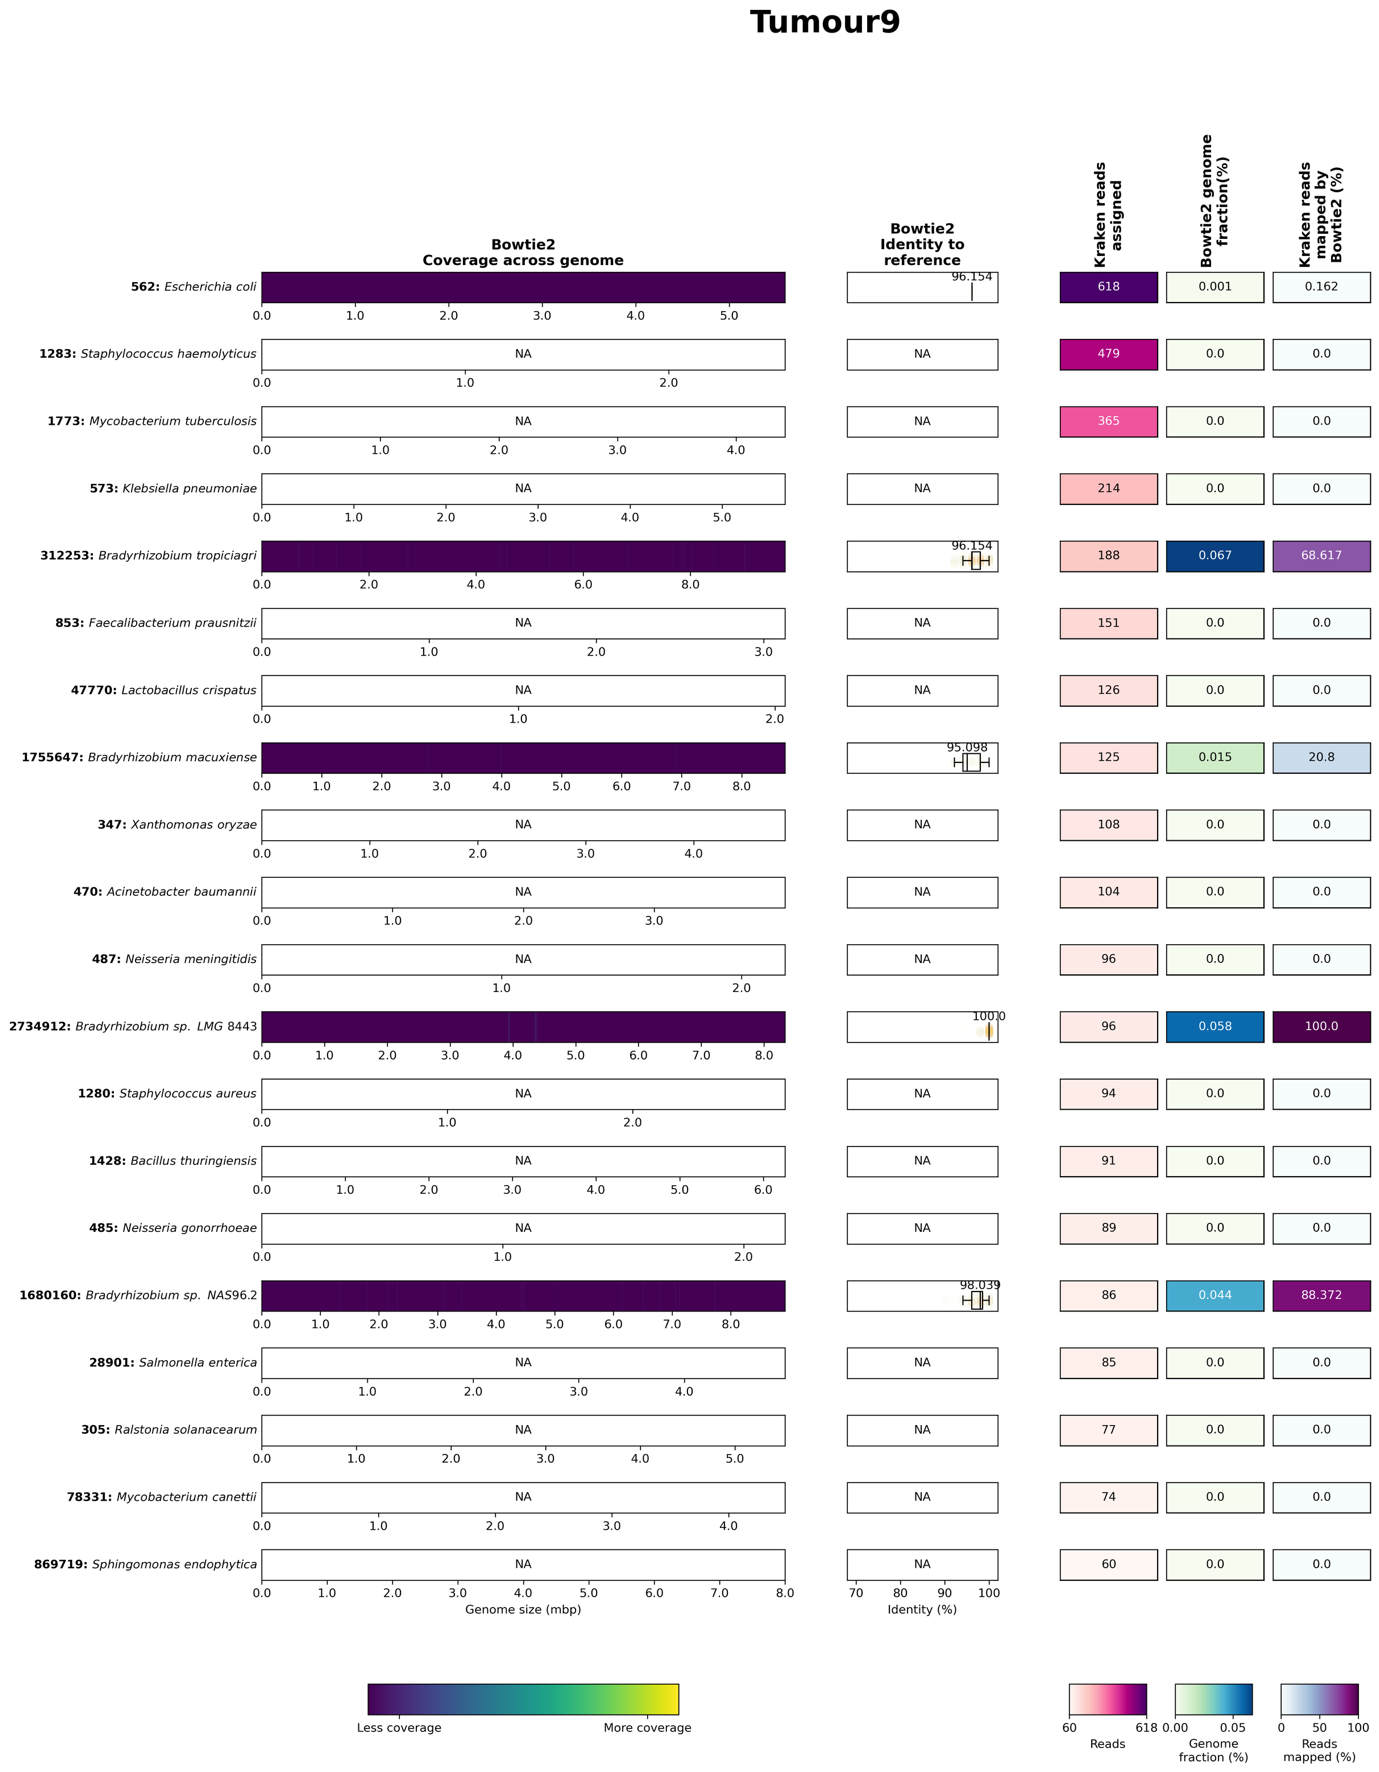


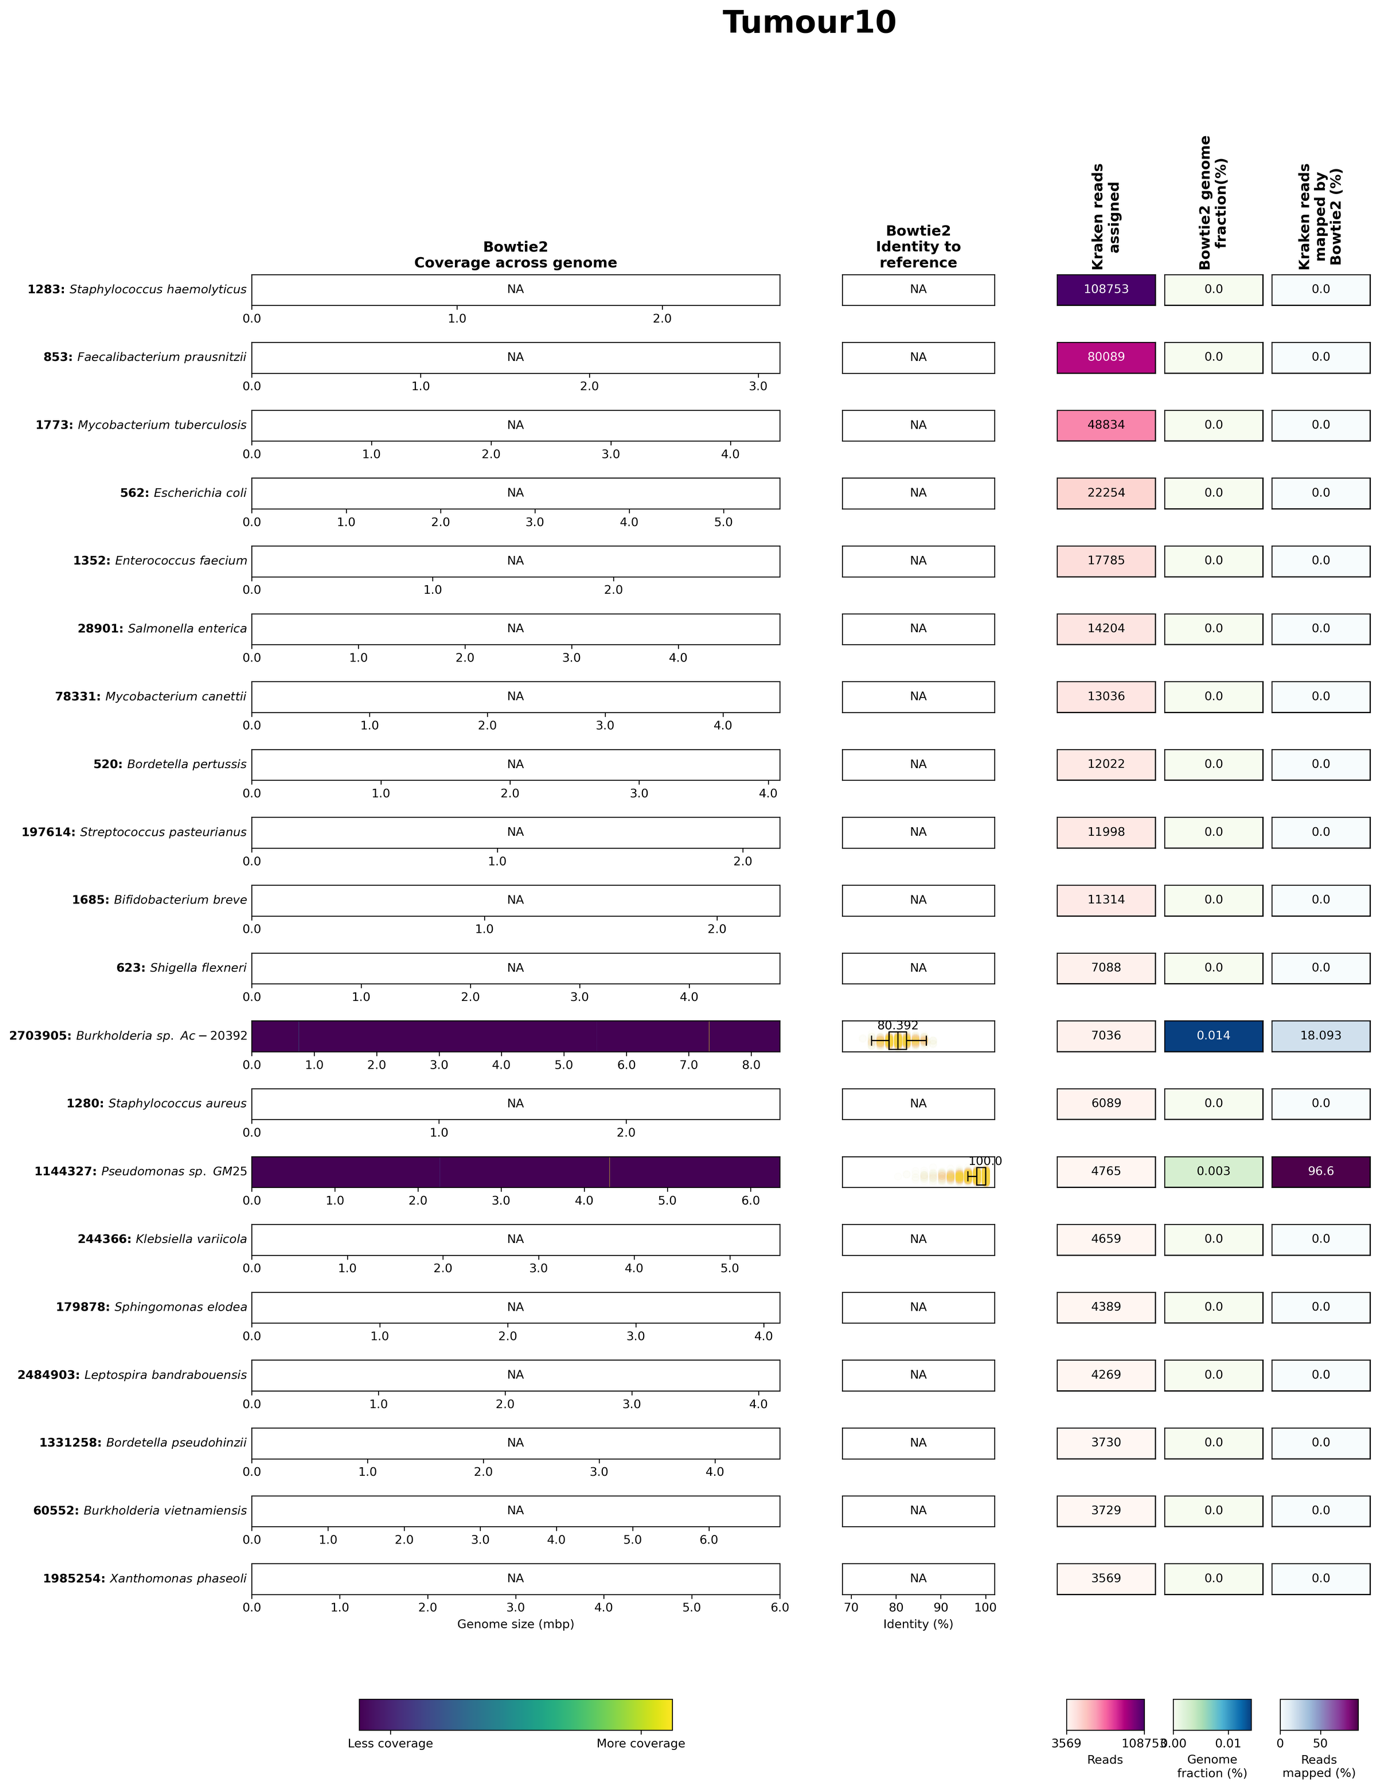

Supplement: Supplementary file 7 [file 7bd5655446ee1b0caa5eaa94.docx]
