# Supplementary material for: From classification to confirmation: verifying taxonomic classifications by mapping metagenomic reads to reference genomes
Source: Research Square preprint supplement (doi:10.21203/rs.3.rs-8224247/v1), 2025-12-01
Supplement: Supplementary file 2 [file 2996b019dd2c266184e13c8a.xlsx]

## Sheet: S4A Stool
Table S4A. Genome Coverage Checker output for Stool samples. Stool_refseq refers to the reads from all samples combined.
Sample	taxid	Species name	Reference genome length (bp)	Kraken reads assigned	Bowtie2 reads mapped	Proportion kraken reads mapped with Bowtie2	Bowtie2 mean identity of mapped reads (%)	Bowtie2 mean MAPQ of mapped reads	Bowtie2 genome fraction (%)
Stool_refseq	7	Azorhizobium_caulinodans	5369772	6	0	0			0
Stool_refseq	9	Buchnera_aphidicola	641454	248	0	0			0
Stool_refseq	14	Dictyoglomus_thermophilum	1959987	17	0	0			0
Stool_refseq	19	Syntrophotalea_carbinolica	3665893	10	0	0			0
Stool_refseq	21	Phenylobacterium_immobile	3328570	3	0	0			0
Stool_refseq	23	Shewanella_colwelliana	4642543	9	0	0			0
Stool_refseq	24	Shewanella_putrefaciens	4386330	7	2	0.285714	98.6667	1	0.00346531
Stool_refseq	25	Shewanella_hanedai	5939027	1	0	0			0
Stool_refseq	33	Myxococcus_fulvus	10824667	8	0	0			0
Stool_refseq	34	Myxococcus_xanthus	9139763	3	0	0			0
Stool_refseq	35	Corallococcus_macrosporus	8973512	27	0	0			0
Stool_refseq	41	Stigmatella_aurantiaca	9365767	10	0	0			0
Stool_refseq	43	Cystobacter_fuscus	12282374	14	0	0			0
Stool_refseq	48	Archangium_gephyra	12489432	9	0	0			0
Stool_refseq	51	Chondromyces_apiculatus	11577721	43	0	0			0
Stool_refseq	52	Chondromyces_crocatus	11388132	13	0	0			0
Stool_refseq	54	Nannocystis_exedens	12059053	30	0	0			0
Stool_refseq	56	Sorangium_cellulosum	13033779	129	0	0			0
Stool_refseq	63	Vitreoscilla_filiformis	3787551	12	0	0			0
Stool_refseq	69	Lysobacter_enzymogenes	6096022	29	0	0			0
Stool_refseq	72	Simonsiella_muelleri	2469862	6	0	0			0
Stool_refseq	84	Hyphomicrobium_methylovorum	3445405	2	0	0			0
Stool_refseq	86	Hyphomonas_jannaschiana	3640843	2	0	0			0
Stool_refseq	94	Stella_humosa	5832650	45	0	0			0
Stool_refseq	100	Ancylobacter_aquaticus	4831989	3	0	0			0
Stool_refseq	102	Polaribacter_glomeratus	4064562	4	0	0			0
Stool_refseq	103	Flectobacillus_major	6221030	41	1	0.0243902	90.099	2	0.0016396
Stool_refseq	104	Cyclobacterium_marinum	6221273	5	0	0			0
Stool_refseq	106	Runella_slithyformis	6919729	16	0	0			0
Stool_refseq	114	Gemmata_obscuriglobus	8998893	3	0	0			0
Stool_refseq	119	Rubinisphaera_brasiliensis	6006602	8	0	0			0
Stool_refseq	120	Planctopirus_limnophila	5460085	3	0	0			0
Stool_refseq	122	Gimesia_maris	7816689	43	0	0			0
Stool_refseq	124	Blastopirellula_marina	6663851	11	0	0			0
Stool_refseq	128	Isosphaera_pallida	5529304	2	0	0			0
Stool_refseq	134	Methylocystis_parvus	4529117	18	0	0			0
Stool_refseq	139	Borreliella_burgdorferi	1321434	5	0	0			0
Stool_refseq	140	Borrelia_hermsii	1161689	28	0	0			0
Stool_refseq	144	Borrelia_coriaceae	1787333	3	0	0			0
Stool_refseq	148	Sediminispirochaeta_bajacaliforniensis	4576607	7	0	0			0
Stool_refseq	150	Spirochaeta_isovalerica	4875193	208	0	0			0
Stool_refseq	154	Spirochaeta_thermophila	2560222	20	0	0			0
Stool_refseq	156	Treponema_zuelzerae	3621248	31	0	0			0
Stool_refseq	158	Treponema_denticola	2843201	407	4	0.00982801	95.6865	27.75	0.0101998
Stool_refseq	159	Brachyspira_hyodysenteriae	3085162	63	1	0.015873	94.6809	24	0.00307925
Stool_refseq	160	Treponema_pallidum	1139633	2	0	0			0
Stool_refseq	162	Treponema_phagedenis	3372116	39	15	0.384615	96.4042	25.4667	0.0117137
Stool_refseq	163	Treponema_bryantii	3516600	348	0	0			0
Stool_refseq	164	Treponema_pectinovorum	2224027	29	0	0			0
Stool_refseq	165	Treponema_saccharophilum	3459320	42	0	0			0
Stool_refseq	167	Treponema_succinifaciens	2897425	53	0	0			0
Stool_refseq	172	Leptospira_biflexa	3951448	5	0	0			0
Stool_refseq	173	Leptospira_interrogans	4630763	47	0	0			0
Stool_refseq	174	Leptospira_borgpetersenii	3992782	2	0	0			0
Stool_refseq	180	Leptospirillum_ferrooxidans	2559538	3	0	0			0
Stool_refseq	183	Leptonema_illini	4522760	1	0	0			0
Stool_refseq	188	Magnetospirillum_magnetotacticum	4523935	2	0	0			0
Stool_refseq	189	Novispirillum_itersonii	4290651	111	0	0			0
Stool_refseq	190	Aquaspirillum_serpens	2612795	13	0	0			0
Stool_refseq	192	Azospirillum_brasilense	7030811	57	0	0			0
Stool_refseq	193	Azospirillum_lipoferum	7987183	4	0	0			0
Stool_refseq	195	Campylobacter_coli	1716536	3213	0	0			0
Stool_refseq	196	Campylobacter_fetus	1804582	188	0	0			0
Stool_refseq	197	Campylobacter_jejuni	1641481	706	0	0			0
Stool_refseq	198	Campylobacter_hyointestinalis	1808149	152	0	0			0
Stool_refseq	199	Campylobacter_concisus	1840041	3043	257	0.0844561	95.7908	27.0545	0.83672
Stool_refseq	200	Campylobacter_curvus	1974918	30	3	0.1	95.7579	28.6667	0.00936748
Stool_refseq	201	Campylobacter_lari	1488515	549	0	0			0
Stool_refseq	202	Campylobacter_mucosalis	1773478	20	0	0			0
Stool_refseq	203	Campylobacter_rectus	2571679	4	0	0			0
Stool_refseq	204	Campylobacter_showae	2097887	54	9	0.166667	93.8866	15.1111	0.0318892
Stool_refseq	206	Campylobacter_sputorum	1753386	5	0	0			0
Stool_refseq	210	Helicobacter_pylori	1696601	363058	0	0			0
Stool_refseq	213	Helicobacter_cinaedi	2101402	3	0	0			0
Stool_refseq	214	Helicobacter_felis	1672681	1	0	0			0
Stool_refseq	216	Helicobacter_muridarum	2263336	3	0	0			0
Stool_refseq	217	Helicobacter_mustelae	1576607	2	0	0			0
Stool_refseq	235	Brucella_abortus	3296863	2	0	0			0
Stool_refseq	238	Elizabethkingia_meningoseptica	3874791	5	0	0			0
Stool_refseq	244	Planomicrobium_okeanokoites	3434210	12	0	0			0
Stool_refseq	245	Flavobacterium_aquatile	3490856	35	0	0			0
Stool_refseq	246	Chryseobacterium_balustinum	4974086	4	0	0			0
Stool_refseq	247	Empedobacter_brevis	3792478	32	0	0			0
Stool_refseq	249	Terrimonas_ferruginea	4686152	15	0	0			0
Stool_refseq	250	Chryseobacterium_gleum	5643321	19	0	0			0
Stool_refseq	251	Psychroflexus_gondwanensis	3311768	5	0	0			0
Stool_refseq	252	Halomonas_halmophila	3253825	19	0	0			0
Stool_refseq	253	Chryseobacterium_indologenes	4929686	276	0	0			0
Stool_refseq	254	Chryseobacterium_indoltheticum	4253895	58	0	0			0
Stool_refseq	256	Myroides_odoratus	4242475	26	0	0			0
Stool_refseq	258	Sphingobacterium_spiritivorum	5138280	50	0	0			0
Stool_refseq	259	Sphingobacterium_thalpophilum	5962893	7	0	0			0
Stool_refseq	263	Francisella_tularensis	1870206	31	0	0			0
Stool_refseq	266	Paracoccus_denitrificans	5242327	3	0	0			0
Stool_refseq	271	Thermus_aquaticus	2338641	2	0	0			0
Stool_refseq	274	Thermus_thermophilus	2116056	14	2	0.142857	99.0099	42	0.00496206
Stool_refseq	276	Thermus_filiformis	2386081	2	0	0			0
Stool_refseq	277	Meiothermus_ruber	3097457	11	0	0			0
Stool_refseq	280	Xanthobacter_autotrophicus	5013287	15	0	0			0
Stool_refseq	281	Xanthobacter_flavus	5768244	10	0	0			0
Stool_refseq	285	Comamonas_testosteroni	5497097	25	0	0			0
Stool_refseq	287	Pseudomonas_aeruginosa	6264404	13227	0	0			0
Stool_refseq	288	Pseudoalteromonas_atlantica	4468419	30	0	0			0
Stool_refseq	292	Burkholderia_cepacia	8366868	38	0	0			0
Stool_refseq	293	Brevundimonas_diminuta	3438815	46	3	0.0652174	94.3762	17	0.00593228
Stool_refseq	294	Pseudomonas_fluorescens	6511547	788	0	0			0
Stool_refseq	296	Pseudomonas_fragi	5077209	30	7	0.233333	99.8299	42	0.00567241
Stool_refseq	297	Hydrogenophilus_thermoluteolus	2288780	23	21	0.913043	97.827	35.5238	0.0348657
Stool_refseq	298	Pseudomonas_marginalis	6799674	2	0	0			0
Stool_refseq	300	Pseudomonas_mendocina	5372474	181	34	0.187845	94.6125	19.5588	0.0484693
Stool_refseq	301	Pseudomonas_oleovorans	4686340	33	9	0.272727	95.474	23.7778	0.017327
Stool_refseq	303	Pseudomonas_putida	6156701	13313	3	0.000225344	92.0792	3	0.00165673
Stool_refseq	304	Pelomonas_saccharophila	5771016	6	2	0.333333	98.2456	42	0.00100502
Stool_refseq	305	Ralstonia_solanacearum	5530249	50	0	0			0
Stool_refseq	316	Stutzerimonas_stutzeri	4545686	184	24	0.130435	99.2821	42	0.0226368
Stool_refseq	317	Pseudomonas_syringae	5868373	104	1	0.00961538	94.0594	23	0.00173813
Stool_refseq	329	Ralstonia_pickettii	5254771	30	9	0.3	96.5817	30.2222	0.0118178
Stool_refseq	337	Burkholderia_glumae	6820727	15	1	0.0666667	98.0198	1	0.00149544
Stool_refseq	339	Xanthomonas_campestris	4942039	208	117	0.5625	98.1357	38.0342	0.135309
Stool_refseq	343	Xanthomonas_translucens	4649333	37	0	0			0
Stool_refseq	346	Xanthomonas_citri	5222255	7	0	0			0
Stool_refseq	347	Xanthomonas_oryzae	4846413	10	0	0			0
Stool_refseq	350	Zoogloea_ramigera	4605859	4	0	0			0
Stool_refseq	353	Azotobacter_chroococcum	5023055	9	0	0			0
Stool_refseq	354	Azotobacter_vinelandii	5365318	2	0	0			0
Stool_refseq	358	Agrobacterium_tumefaciens	6002464	260	0	0			0
Stool_refseq	359	Agrobacterium_rhizogenes	6215524	44	0	0			0
Stool_refseq	373	Agrobacterium_vitis	5754491	73	0	0			0
Stool_refseq	375	Bradyrhizobium_japonicum	9226248	20	0	0			0
Stool_refseq	380	Sinorhizobium_fredii	6810864	22	0	0			0
Stool_refseq	381	Mesorhizobium_loti	7451806	10	0	0			0
Stool_refseq	382	Sinorhizobium_meliloti	6926935	13	0	0			0
Stool_refseq	384	Rhizobium_leguminosarum	7598116	186	4	0.0215054	97.0238	1	0.00168463
Stool_refseq	396	Rhizobium_phaseoli	6726041	3	0	0			0
Stool_refseq	398	Rhizobium_tropici	6686334	1	0	0			0
Stool_refseq	399	Neorhizobium_galegae	6455027	13	0	0			0
Stool_refseq	405	Methylobacillus_flagellatus	2971517	7	0	0			0
Stool_refseq	406	Methylobacillus_glycogenes	3248999	1	0	0			0
Stool_refseq	408	Methylorubrum_extorquens	6123851	6	0	0			0
Stool_refseq	410	Methylobacterium_organophilum	5319780	26	2	0.0769231	100	42	0.00197377
Stool_refseq	414	Methylococcus_capsulatus	3304561	13	0	0			0
Stool_refseq	415	Methylobacter_luteus	5029135	9	0	0			0
Stool_refseq	421	Methylomonas_methanica	5023270	7	0	0			0
Stool_refseq	426	Methylosinus_trichosporium	4962262	2	0	0			0
Stool_refseq	428	Methylosinus_sporium	3785845	3	2	0.666667	91.6667	3	0.00192824
Stool_refseq	435	Acetobacter_aceti	3634414	7	0	0			0
Stool_refseq	436	Novacetimonas_hansenii	3549186	5	0	0			0
Stool_refseq	437	Acidomonas_methanolica	3681251	2	0	0			0
Stool_refseq	438	Acetobacter_pasteurianus	3403928	2	0	0			0
Stool_refseq	442	Gluconobacter_oxydans	2882437	1	0	0			0
Stool_refseq	446	Legionella_pneumophila	3409143	23	0	0			0
Stool_refseq	447	Legionella_bozemanae	4232311	1	0	0			0
Stool_refseq	448	Legionella_erythra	3239140	3	0	0			0
Stool_refseq	449	Legionella_hackeliae	3570857	2	0	0			0
Stool_refseq	452	Legionella_spiritensis	3348070	8	0	0			0
Stool_refseq	454	Legionella_israelensis	3111640	61	0	0			0
Stool_refseq	456	Legionella_jordanis	3133723	11	0	0			0
Stool_refseq	458	Legionella_rubrilucens	3186910	5	0	0			0
Stool_refseq	460	Legionella_steigerwaltii	3998094	3	0	0			0
Stool_refseq	463	Fluoribacter_dumoffii	3909670	2	0	0			0
Stool_refseq	466	Legionella_maceachernii	3661065	34	0	0			0
Stool_refseq	470	Acinetobacter_baumannii	3999136	22060	5	0.000226655	97.4858	25.6	0.00572624
Stool_refseq	471	Acinetobacter_calcoaceticus	3945682	4	0	0			0
Stool_refseq	476	Moraxella_bovis	2807142	17	0	0			0
Stool_refseq	477	Moraxella_lacunata	3178664	9	0	0			0
Stool_refseq	478	Moraxella_nonliquefaciens	2343743	2	0	0			0
Stool_refseq	480	Moraxella_catarrhalis	1994386	7	0	0			0
Stool_refseq	483	Neisseria_cinerea	1832904	52	9	0.173077	95.9204	32.8889	0.0221506
Stool_refseq	484	Neisseria_flavescens	2231882	6	5	0.833333	97.1353	40.4	0.00864741
Stool_refseq	485	Neisseria_gonorrhoeae	2171755	19	0	0			0
Stool_refseq	486	Neisseria_lactamica	2200224	35	1	0.0285714	99.0099	42	0.00463589
Stool_refseq	487	Neisseria_meningitidis	2181327	61	9	0.147541	95.5475	25.4444	0.0171455
Stool_refseq	488	Neisseria_mucosa	2654294	73	25	0.342466	95.7226	27.48	0.0301022
Stool_refseq	489	Neisseria_polysaccharea	2029584	1	0	0			0
Stool_refseq	490	Neisseria_sicca	2566407	196	51	0.260204	95.8486	27	0.112648
Stool_refseq	494	Bergeriella_denitrificans	2549372	24	0	0			0
Stool_refseq	495	Neisseria_elongata	2406516	34	4	0.117647	97.0248	33	0.0126324
Stool_refseq	496	Neisseria_macacae	2801968	8	5	0.625	98.0609	38	0.0086011
Stool_refseq	498	Psychrobacter_immobilis	3243066	11	0	0			0
Stool_refseq	500	Thermomicrobium_roseum	2920744	8	0	0			0
Stool_refseq	502	Kingella_denitrificans	2220058	24	10	0.416667	98.0484	38.2	0.0213958
Stool_refseq	504	Kingella_kingae	2006553	113	0	0			0
Stool_refseq	505	Kingella_oralis	2420532	5	4	0.8	100	42	0.00285061
Stool_refseq	511	Alcaligenes_faecalis	4248684	38	6	0.157895	100	42	0.00195355
Stool_refseq	518	Bordetella_bronchiseptica	5199761	5	0	0			0
Stool_refseq	520	Bordetella_pertussis	4088701	1	0	0			0
Stool_refseq	521	Bordetella_avium	3721798	11	0	0			0
Stool_refseq	524	Acidiphilium_cryptum	3963080	2	0	0			0
Stool_refseq	525	Acidocella_facilis	3403931	11	0	0			0
Stool_refseq	529	Brucella_anthropi	4858647	14	0	0			0
Stool_refseq	531	Polaribacter_irgensii	2763458	1	0	0			0
Stool_refseq	533	Beijerinckia_indica	4418616	11	1	0.0909091	92	8	0.00172
Stool_refseq	536	Chromobacterium_violaceum	4808040	8	0	0			0
Stool_refseq	537	Iodobacter_fluviatilis	5098455	10	0	0			0
Stool_refseq	539	Eikenella_corrodens	2192577	52	12	0.230769	95.8524	24.3333	0.038904
Stool_refseq	542	Zymomonas_mobilis	2163236	20	0	0			0
Stool_refseq	545	Citrobacter_koseri	4735357	24	2	0.0833333	95.6073	31.5	0.00251301
Stool_refseq	546	Citrobacter_freundii	5171093	240	76	0.316667	97.7888	37.2368	0.0961886
Stool_refseq	548	Klebsiella_aerogenes	5281764	121	14	0.115702	97.4961	34.1429	0.011871
Stool_refseq	549	Pantoea_agglomerans	4692018	30	0	0			0
Stool_refseq	550	Enterobacter_cloacae	5023439	47	3	0.0638298	97.0794	30	0.00531508
Stool_refseq	552	Erwinia_amylovora	3832351	36	0	0			0
Stool_refseq	553	Pantoea_ananatis	4867131	16	0	0			0
Stool_refseq	554	Pectobacterium_carotovorum	4892225	16	0	0			0
Stool_refseq	556	Dickeya_chrysanthemi	4813854	16	0	0			0
Stool_refseq	562	Escherichia_coli	5594605	59556	25204	0.423198	97.3052	34.3867	17.7803
Stool_refseq	563	Shimwellia_blattae	4158725	24	5	0.208333	98.4039	42	0.00733398
Stool_refseq	564	Escherichia_fergusonii	4645928	128	67	0.523438	96.8492	34.1791	0.0744523
Stool_refseq	565	Atlantibacter_hermannii	4554875	45	5	0.111111	97.8571	38.2	0.00821098
Stool_refseq	566	Pseudescherichia_vulneris	4398823	21	0	0			0
Stool_refseq	569	Hafnia_alvei	4772047	18	0	0			0
Stool_refseq	571	Klebsiella_oxytoca	5857964	54	26	0.481481	96.3188	28.7308	0.0304543
Stool_refseq	573	Klebsiella_pneumoniae	5682322	90764	1234	0.0135957	98.2806	38.4408	1.37572
Stool_refseq	575	Raoultella_planticola	5823931	10	2	0.2	100	42	0.00350279
Stool_refseq	577	Raoultella_terrigena	5598454	10	0	0			0
Stool_refseq	580	Kluyvera_cryocrescens	4765584	4	0	0			0
Stool_refseq	582	Morganella_morganii	3889903	2785	2006	0.720287	97.2562	34.7906	3.22036
Stool_refseq	584	Proteus_mirabilis	4099895	102	0	0			0
Stool_refseq	585	Proteus_vulgaris	4035522	8	0	0			0
Stool_refseq	587	Providencia_rettgeri	4641942	30	0	0			0
Stool_refseq	588	Providencia_stuartii	4487528	13	0	0			0
Stool_refseq	614	Serratia_liquefaciens	5282719	12	0	0			0
Stool_refseq	615	Serratia_marcescens	5160776	1093	0	0			0
Stool_refseq	618	Serratia_odorifera	5001108	3	0	0			0
Stool_refseq	621	Shigella_boydii	4825405	51	41	0.803922	98.2744	40.0488	0.0358726
Stool_refseq	622	Shigella_dysenteriae	5192674	40	35	0.875	98.244	39.7714	0.035319
Stool_refseq	623	Shigella_flexneri	4828820	2064	99	0.0479651	98.1951	36.9899	0.120816
Stool_refseq	624	Shigella_sonnei	4994001	132	67	0.507576	97.5841	36.6567	0.0767921
Stool_refseq	628	Xenorhabdus_nematophila	4587917	3	0	0			0
Stool_refseq	630	Yersinia_enterocolitica	4625880	27	1	0.037037	98.8764	1	0.00194558
Stool_refseq	631	Yersinia_intermedia	4928910	19	0	0			0
Stool_refseq	632	Yersinia_pestis	4658411	14	9	0.642857	98.6656	1	0.0194702
Stool_refseq	633	Yersinia_pseudotuberculosis	4610200	1	0	0			0
Stool_refseq	634	Yersinia_bercovieri	4401131	4	0	0			0
Stool_refseq	636	Edwardsiella_tarda	3802888	11	0	0			0
Stool_refseq	638	Arsenophonus_nasoniae	4987107	5	0	0			0
Stool_refseq	644	Aeromonas_hydrophila	4744448	60	0	0			0
Stool_refseq	645	Aeromonas_salmonicida	4954811	46	0	0			0
Stool_refseq	646	Aeromonas_sobria	4683669	10	0	0			0
Stool_refseq	648	Aeromonas_caviae	4586140	29	0	0			0
Stool_refseq	649	Aeromonas_eucrenophila	4540059	1	0	0			0
Stool_refseq	650	Aeromonas_jandaei	4551079	17	0	0			0
Stool_refseq	651	Aeromonas_media	4531033	21	0	0			0
Stool_refseq	652	Aeromonas_schubertii	4140228	14	0	0			0
Stool_refseq	654	Aeromonas_veronii	4561870	53	1	0.0188679	92.0792	3	0.00223593
Stool_refseq	656	Aeromonas_allosaccharophila	4630407	36	0	0			0
Stool_refseq	659	Photobacterium_phosphoreum	4550107	10	0	0			0
Stool_refseq	661	Photobacterium_angustum	4882508	10	0	0			0
Stool_refseq	663	Vibrio_alginolyticus	5150420	2	0	0			0
Stool_refseq	666	Vibrio_cholerae	4138412	831	0	0			0
Stool_refseq	668	Aliivibrio_fischeri	4273718	44	0	0			0
Stool_refseq	669	Vibrio_harveyi	5869008	12	0	0			0
Stool_refseq	670	Vibrio_parahaemolyticus	5165770	10736	1	9.31446e-05	97.0297	1	0.00197454
Stool_refseq	672	Vibrio_vulnificus	5007160	24	0	0			0
Stool_refseq	673	Grimontia_hollisae	3998439	4	0	0			0
Stool_refseq	674	Vibrio_mimicus	4443087	10	0	0			0
Stool_refseq	675	Vibrio_cincinnatiensis	3800816	36	0	0			0
Stool_refseq	676	Vibrio_fluvialis	4827733	16	0	0			0
Stool_refseq	680	Vibrio_campbellii	5425575	8	1	0.125	98.0198	1	0.00187999
Stool_refseq	685	Vibrio_diazotrophicus	4820957	84	0	0			0
Stool_refseq	687	Vibrio_gazogenes	4712479	11	0	0			0
Stool_refseq	689	Vibrio_mediterranei	5651202	1	0	0			0
Stool_refseq	691	Vibrio_natriegens	5175153	8	0	0			0
Stool_refseq	693	Vibrio_nereis	4085582	3	0	0			0
Stool_refseq	703	Plesiomonas_shigelloides	3860786	20	0	0			0
Stool_refseq	714	Aggregatibacter_actinomycetemcomitans	2109143	141	55	0.390071	96.364	29.2545	0.0432403
Stool_refseq	715	Actinobacillus_pleuropneumoniae	2318657	96	2	0.0208333	92.0792	3	0.0043991
Stool_refseq	716	Actinobacillus_suis	2501598	29	24	0.827586	95.7037	26.8333	0.00551647
Stool_refseq	717	Actinobacillus_capsulatus	2621135	17	0	0			0
Stool_refseq	718	Actinobacillus_equuli	2451991	16	0	0			0
Stool_refseq	720	Actinobacillus_lignieresii	2236520	2	0	0			0
Stool_refseq	722	Actinobacillus_seminis	2467403	26	1	0.0384615	96.2963	40	0.00222906
Stool_refseq	723	Actinobacillus_ureae	2492689	23	0	0			0
Stool_refseq	726	Haemophilus_haemolyticus	1934644	5203	1230	0.236402	94.9698	21.3008	1.76901
Stool_refseq	727	Haemophilus_influenzae	1890662	7469	455	0.0609185	95.1071	22.7143	0.543513
Stool_refseq	728	Avibacterium_paragallinarum	2521134	27	2	0.0740741	91.6667	3	0.00241955
Stool_refseq	729	Haemophilus_parainfluenzae	2141704	355965	208757	0.586454	95.7166	26.3167	77.4908
Stool_refseq	730	#NAME?	1589620	35	0	0			0
Stool_refseq	731	Histophilus_somni	2263857	23	2	0.0869565	94.0396	13.5	0.008967
Stool_refseq	732	Aggregatibacter_aphrophilus	2337153	874	448	0.512586	96.839	29.5804	0.907215
Stool_refseq	733	Canicola_haemoglobinophilus	2436406	72	37	0.513889	94.7805	19.7568	0.0451074
Stool_refseq	734	Haemophilus_paracuniculus	2047249	46	0	0			0
Stool_refseq	735	Haemophilus_parahaemolyticus	2093459	347	96	0.276657	97.7447	35.9167	0.139578
Stool_refseq	736	Haemophilus_paraphrohaemolyticus	2138467	114	58	0.508772	97.0894	30.7241	0.0661221
Stool_refseq	738	Glaesserella_parasuis	2313850	39	6	0.153846	94.093	13.3333	0.0031117
Stool_refseq	739	Aggregatibacter_segnis	2022832	216	116	0.537037	96.7625	31.1034	0.271155
Stool_refseq	747	Pasteurella_multocida	2335516	160	53	0.33125	98.7051	1.86792	0.0577174
Stool_refseq	750	Gallibacterium_anatis	2408630	33	0	0			0
Stool_refseq	751	Avibacterium_avium	2205360	5	0	0			0
Stool_refseq	752	Pasteurella_bettyae	2253160	12	10	0.833333	97.3768	35.4	0.0173534
Stool_refseq	753	Pasteurella_canis	2219635	18	5	0.277778	98.6325	17.4	0.0158134
Stool_refseq	754	Pasteurella_dagmatis	2287213	6	6	1	97.8863	41.3333	0.0173136
Stool_refseq	756	Pasteurella_langaaensis	1989693	50	1	0.02	92.0792	3	0.00512642
Stool_refseq	758	Rodentibacter_pneumotropicus	2434546	56	13	0.232143	92.4509	6.76923	0.0271919
Stool_refseq	761	Pasteurella_testudinis	3029577	2	0	0			0
Stool_refseq	762	Avibacterium_volantium	2230476	2	0	0			0
Stool_refseq	770	Anaplasma_marginale	1202435	12	0	0			0
Stool_refseq	774	Bartonella_bacilliformis	1445021	11	0	0			0
Stool_refseq	777	Coxiella_burnetii	2032807	4	0	0			0
Stool_refseq	779	Ehrlichia_ruminantium	1516355	37	0	0			0
Stool_refseq	781	Rickettsia_conorii	1268755	3	0	0			0
Stool_refseq	782	Rickettsia_prowazekii	1109804	3	0	0			0
Stool_refseq	783	Rickettsia_rickettsii	1257710	15	0	0			0
Stool_refseq	784	Orientia_tsutsugamushi	2078193	3	0	0			0
Stool_refseq	786	Rickettsia_akari	1231060	2	0	0			0
Stool_refseq	788	Rickettsia_canadensis	1150228	7	0	0			0
Stool_refseq	803	Bartonella_quintana	1588683	2	0	0			0
Stool_refseq	813	Chlamydia_trachomatis	1042519	39	0	0			0
Stool_refseq	817	Bacteroides_fragilis	5241700	431272	243705	0.565084	98.8155	40.2884	52.5665
Stool_refseq	818	Bacteroides_thetaiotaomicron	6304193	793791	375243	0.472723	97.8575	36.7934	49.2986
Stool_refseq	820	Bacteroides_uniformis	4920161	863645	381750	0.442022	98.1938	37.3854	40.6943
Stool_refseq	821	Phocaeicola_vulgatus	5163189	4841921	2788550	0.575918	98.4795	38.9367	68.7237
Stool_refseq	823	Parabacteroides_distasonis	5348976	248390	48630	0.195781	97.8753	35.9839	17.8036
Stool_refseq	824	Campylobacter_gracilis	2281652	141	131	0.929078	96.2007	31.0305	0.382749
Stool_refseq	826	Sebaldella_termitidis	4486650	11	0	0			0
Stool_refseq	827	Campylobacter_ureolyticus	1820334	32	2	0.0625	95.5446	31.5	0.0112067
Stool_refseq	831	Butyrivibrio_fibrisolvens	4934347	3740	41	0.0109626	92.985	9.41463	0.0145105
Stool_refseq	833	Fibrobacter_succinogenes	3843004	130	0	0			0
Stool_refseq	837	Porphyromonas_gingivalis	2354886	536	7	0.0130597	95.5121	10.4286	0.0201708
Stool_refseq	839	Prevotella_ruminicola	3619559	1173	29	0.0247229	94.437	13.1379	0.0130679
Stool_refseq	840	Prevotella_loescheii	3508589	143	8	0.0559441	99.0793	39.75	0.00800892
Stool_refseq	844	Wolinella_succinogenes	2150449	2	0	0			0
Stool_refseq	847	Oxalobacter_formigenes	2468871	54	1	0.0185185	97.0149	40	0.0027543
Stool_refseq	849	Fusobacterium_gonidiaformans	1678881	73	62	0.849315	98.501	28.3226	0.196083
Stool_refseq	850	Fusobacterium_mortiferum	2716766	807	0	0			0
Stool_refseq	851	Fusobacterium_nucleatum	2180101	304	45	0.148026	94.9569	21.4667	0.115086
Stool_refseq	852	Fusobacterium_perfoetens	2103008	195	0	0			0
Stool_refseq	853	Faecalibacterium_prausnitzii	3127383	2711116	931270	0.343501	96.3625	28.9654	84.0012
Stool_refseq	854	Fusobacterium_russii	1941804	10	0	0			0
Stool_refseq	856	Fusobacterium_varium	3346458	150	0	0			0
Stool_refseq	859	Fusobacterium_necrophorum	2288480	84	3	0.0357143	96.0231	28.3333	0.00707893
Stool_refseq	860	Fusobacterium_periodonticum	2615003	63	10	0.15873	95.6197	21.3	0.0265392
Stool_refseq	861	Fusobacterium_ulcerans	3537675	102	1	0.00980392	94.6429	23	0.00161123
Stool_refseq	863	Syntrophomonas_wolfei	2936195	39	0	0			0
Stool_refseq	865	Pectinatus_frisingensis	2881049	167	0	0			0
Stool_refseq	867	Ruminobacter_amylophilus	2815061	6	1	0.166667	93.6842	8	0.00341023
Stool_refseq	870	Dichelobacter_nodosus	1389350	7	0	0			0
Stool_refseq	873	Desulfocurvibacter_africanus	4200534	49	0	0			0
Stool_refseq	876	Desulfovibrio_desulfuricans	3554892	96	4	0.0416667	97.4477	23	0.00748265
Stool_refseq	878	Solidesulfovibrio_fructosivorans	4673595	45	0	0			0
Stool_refseq	879	Megalodesulfovibrio_gigas	3796022	23	0	0			0
Stool_refseq	880	Maridesulfovibrio_salexigens	4289847	16	0	0			0
Stool_refseq	881	Desulfovibrio_vulgaris	3661391	3	0	0			0
Stool_refseq	889	Paucidesulfovibrio_longus	3701832	6	0	0			0
Stool_refseq	891	Desulfuromonas_acetoxidans	3828328	13	0	0			0
Stool_refseq	894	Desulfobulbus_propionicus	3851869	44	0	0			0
Stool_refseq	897	Desulfococcus_multivorans	4455976	101	0	0			0
Stool_refseq	899	Desulfomicrobium_baculatum	3942657	12	0	0			0
Stool_refseq	901	Desulfovibrio_piger	2582155	979	8	0.0081716	97.057	32.75	0.0202931
Stool_refseq	905	Acidaminococcus_fermentans	2329769	538	2	0.00371747	92.3077	3	0.00339089
Stool_refseq	907	Megasphaera_elsdenii	2478942	1859	197	0.105971	94.0653	11.9086	0.293351
Stool_refseq	912	Nitrobacter_hamburgensis	5011522	3	0	0			0
Stool_refseq	913	Nitrobacter_winogradskyi	3402093	10	0	0			0
Stool_refseq	915	Nitrosomonas_europaea	2812094	6	1	0.166667	93	8	0.00359163
Stool_refseq	916	Nitrosomonas_eutropha	2781824	70	0	0			0
Stool_refseq	917	Nitrosomonas_marina	3496909	46	0	0			0
Stool_refseq	920	Acidithiobacillus_ferrooxidans	2982397	25	0	0			0
Stool_refseq	921	Starkeya_novella	4765023	14	0	0			0
Stool_refseq	923	Guyparkeria_hydrothermalis	2433989	3	0	0			0
Stool_refseq	926	Thiomonas_intermedia	3343428	4	0	0			0
Stool_refseq	927	Halothiobacillus_neapolitanus	2582886	12	0	0			0
Stool_refseq	929	Thermithiobacillus_tepidarius	2958498	12	4	0.333333	98.2673	37	0.00946426
Stool_refseq	930	Acidithiobacillus_thiooxidans	3415726	5	0	0			0
Stool_refseq	931	Thiobacillus_thioparus	3201518	5	0	0			0
Stool_refseq	934	Thiomicrospira_pelophila	2108215	13	0	0			0
Stool_refseq	944	Ehrlichia_canis	1315030	4	0	0			0
Stool_refseq	945	Ehrlichia_chaffeensis	1176248	2	0	0			0
Stool_refseq	948	Anaplasma_phagocytophilum	1479407	4	0	0			0
Stool_refseq	950	Neorickettsia_risticii	879977	1	0	0			0
Stool_refseq	954	Francisella_persica	1516676	14	0	0			0
Stool_refseq	955	Wolbachia_pipientis	1267781	76	0	0			0
Stool_refseq	959	Bdellovibrio_bacteriovorus	3782950	38	0	0			0
Stool_refseq	960	Bacteriovorax_stolpii	3810309	95	0	0			0
Stool_refseq	964	Herbaspirillum_seropedicae	5509723	2	0	0			0
Stool_refseq	966	Oceanospirillum_linum	3654430	4	0	0			0
Stool_refseq	971	Selenomonas_ruminantium	3387070	761	2	0.00262812	91.9355	3	0.00186001
Stool_refseq	979	Cellulophaga_lytica	3765936	1	0	0			0
Stool_refseq	982	Saccharicrinis_fermentans	5982061	9	0	0			0
Stool_refseq	983	Flavobacterium_flevense	4230539	2	0	0			0
Stool_refseq	984	Pedobacter_heparinus	5167383	3	0	0			0
Stool_refseq	985	Cytophaga_hutchinsonii	4433218	11	0	0			0
Stool_refseq	986	Flavobacterium_johnsoniae	6096872	44	1	0.0227273	92.0792	3	0.00167299
Stool_refseq	987	Aquimarina_latercula	6245252	27	0	0			0
Stool_refseq	988	Leeuwenhoekiella_marinoflava	4747764	9	0	0			0
Stool_refseq	989	Marinilabilia_salmonicolor	4982627	190	0	0			0
Stool_refseq	990	Breznakibacter_xylanolyticus	4380952	45	4	0.0888889	94.283	21.5	0.00152935
Stool_refseq	991	Flavobacterium_hydatis	5902573	2	1	0.5	98.3333	42	0.00103345
Stool_refseq	995	Solitalea_canadensis	5202069	20	0	0			0
Stool_refseq	996	Flavobacterium_columnare	3221278	41	2	0.0487805	97.9975	1	0.00614663
Stool_refseq	997	Eisenibacter_elegans	4030713	116	8	0.0689655	94.614	7.625	0.00714514
Stool_refseq	998	Flexibacter_flexilis	4249974	22	4	0.181818	92.4051	3	0.00188236
Stool_refseq	999	Bernardetia_litoralis	4919337	11	0	0			0
Stool_refseq	1002	Hugenholtzia_roseola	4254862	22	0	0			0
Stool_refseq	1003	Thermoflexibacter_ruber	5504183	4	0	0			0
Stool_refseq	1004	Chitinophaga_sancti	8421768	26	0	0			0
Stool_refseq	1006	Marivirga_tractuosa	4516490	23	0	0			0
Stool_refseq	1008	Saprospira_grandis	4400185	8	0	0			0
Stool_refseq	1010	Sphingobacterium_mizutaii	4653048	7	0	0			0
Stool_refseq	1015	Bergeyella_zoohelcum	2331468	14	8	0.571429	99.2574	42	0.0095219
Stool_refseq	1017	Capnocytophaga_gingivalis	2838633	8	2	0.25	98.7654	42	0.00288871
Stool_refseq	1018	Capnocytophaga_ochracea	2612925	7	0	0			0
Stool_refseq	1019	Capnocytophaga_sputigena	2855148	21	8	0.380952	98.3506	37.75	0.0126438
Stool_refseq	1022	Beggiatoa_alba	4265146	3	0	0			0
Stool_refseq	1026	Marinoscillum_furvescens	5966820	19	0	0			0
Stool_refseq	1027	Microscilla_marina	9771226	40	0	0			0
Stool_refseq	1028	Marivirga_sericea	4741005	3	0	0			0
Stool_refseq	1031	Thiothrix_nivea	4691711	5	0	0			0
Stool_refseq	1034	Afipia_clevelandensis	4399548	4	0	0			0
Stool_refseq	1035	Afipia_felis	4195257	2	0	0			0
Stool_refseq	1048	Marichromatium_gracile	3830035	2	0	0			0
Stool_refseq	1049	Allochromatium_vinosum	3669074	5	0	0			0
Stool_refseq	1050	Thermochromatium_tepidum	2958290	6	0	0			0
Stool_refseq	1052	Halorhodospira_halochloris	2834560	1	0	0			0
Stool_refseq	1053	Halorhodospira_halophila	2678452	9	0	0			0
Stool_refseq	1054	Ectothiorhodospira_shaposhnikovii	3788226	3	0	0			0
Stool_refseq	1057	Thiococcus_pfennigii	4076754	14	0	0			0
Stool_refseq	1058	Thiocapsa_roseopersicina	5386125	13	0	0			0
Stool_refseq	1061	Rhodobacter_capsulatus	3871920	18	0	0			0
Stool_refseq	1063	Cereibacter_sphaeroides	4602977	39	0	0			0
Stool_refseq	1066	Rhodocyclus_tenuis	3854478	9	0	0			0
Stool_refseq	1067	Rhodocyclus_purpureus	3617966	8	0	0			0
Stool_refseq	1069	Rhodomicrobium_vannielii	4014469	48	0	0			0
Stool_refseq	1071	Rhodopila_globiformis	7248147	29	0	0			0
Stool_refseq	1074	Rhodoblastus_acidophilus	4711496	11	0	0			0
Stool_refseq	1075	Fuscovulum_blasticum	3706095	11	0	0			0
Stool_refseq	1076	Rhodopseudomonas_palustris	5457289	58	0	0			0
Stool_refseq	1079	Blastochloris_viridis	3724841	4	0	0			0
Stool_refseq	1080	Afifella_marina	3963421	5	0	0			0
Stool_refseq	1082	Magnetospirillum_fulvum	3805060	9	0	0			0
Stool_refseq	1083	Magnetospirillum_molischianum	3805617	9	0	0			0
Stool_refseq	1084	Pararhodospirillum_photometricum	3876289	13	0	0			0
Stool_refseq	1085	Rhodospirillum_rubrum	4406557	29	0	0			0
Stool_refseq	1086	Rhodothalassium_salexigens	3358756	9	0	0			0
Stool_refseq	1087	Rhodovibrio_salinarum	4176524	29	0	0			0
Stool_refseq	1088	Rhodovibrio_sodomensis	5750741	11	0	0			0
Stool_refseq	1092	Chlorobium_limicola	2763181	38	0	0			0
Stool_refseq	1094	Chlorobium_phaeovibrioides	2094018	8	0	0			0
Stool_refseq	1096	Chlorobium_phaeobacteroides	3133902	11	0	0			0
Stool_refseq	1097	Chlorobaculum_tepidum	2154946	3	0	0			0
Stool_refseq	1100	Pelodictyon_luteolum	2364842	10	0	0			0
Stool_refseq	1102	Prosthecochloris_aestuarii	2579695	8	0	0			0
Stool_refseq	1108	Chloroflexus_aurantiacus	5258541	6	0	0			0
Stool_refseq	1112	Erythrobacter_neustonensis	3090363	2	0	0			0
Stool_refseq	1122	Aphanothece_sacrum	4493232	14	0	0			0
Stool_refseq	1124	Chlorogloeopsis_fritschii	7751745	1	0	0			0
Stool_refseq	1126	Microcystis_aeruginosa	5263219	21	0	0			0
Stool_refseq	1160	Planktothrix_agardhii	4904228	20	0	0			0
Stool_refseq	1164	Trichormus_azollae	5486145	4	0	0			0
Stool_refseq	1166	Dolichospermum_flos-aquae	5220684	1	0	0			0
Stool_refseq	1178	Nostoc_commune	8198700	17	0	0			0
Stool_refseq	1179	Desmonostoc_muscorum	9635616	43	0	0			0
Stool_refseq	1202	Leptolyngbya_ectocarpi	6774485	10	0	0			0
Stool_refseq	1219	Prochlorococcus_marinus	1704176	122	0	0			0
Stool_refseq	1223	Prochlorothrix_hollandica	5646343	5	0	0			0
Stool_refseq	1229	Nitrosococcus_oceani	3522111	11	0	0			0
Stool_refseq	1231	Nitrosospira_multiformis	3234309	10	0	0			0
Stool_refseq	1233	Nitrosovibrio_tenuis	3098034	3	0	0			0
Stool_refseq	1238	Piscirickettsia_salmonis	3351503	12	0	0			0
Stool_refseq	1244	Leuconostoc_gelidum	1893499	31	6	0.193548	96.8647	30	0.0107737
Stool_refseq	1245	Leuconostoc_mesenteroides	2075763	87	12	0.137931	96.7755	32.6667	0.0145489
Stool_refseq	1246	Leuconostoc_lactis	1791608	9	1	0.111111	91	3	0.00563739
Stool_refseq	1247	Oenococcus_oeni	1892074	39	0	0			0
Stool_refseq	1249	Weissella_paramesenteroides	2007410	42	0	0			0
Stool_refseq	1252	Leuconostoc_carnosum	1701333	19	16	0.842105	99.505	42	0.0337383
Stool_refseq	1254	Pediococcus_acidilactici	2044083	269	6	0.0223048	100	42	0.00870806
Stool_refseq	1255	Pediococcus_pentosaceus	1832387	37	0	0			0
Stool_refseq	1258	Peptoniphilus_asaccharolyticus	2320207	229	18	0.0786026	94.7899	23.5	0.0266356
Stool_refseq	1260	Finegoldia_magna	1838801	245	50	0.204082	96.0216	27.52	0.144224
Stool_refseq	1261	Peptostreptococcus_anaerobius	2083092	286	125	0.437063	97.1332	32.168	0.144641
Stool_refseq	1264	Ruminococcus_albus	4482087	7403	1239	0.167365	96.2294	28.8676	0.268491
Stool_refseq	1265	Ruminococcus_flavefaciens	3587803	9601	154	0.01604	94.0569	14.5779	0.0811081
Stool_refseq	1267	Sarcina_ventriculi	2549638	44	2	0.0454545	94.3196	12.5	0.00709905
Stool_refseq	1270	Micrococcus_luteus	2495693	40	17	0.425	95.7618	28.5882	0.0401892
Stool_refseq	1272	Kocuria_varians	2843576	2	0	0			0
Stool_refseq	1273	Micrococcus_lylae	2670883	1	0	0			0
Stool_refseq	1274	Dermacoccus_nishinomiyaensis	3113642	99	70	0.707071	98.0969	36.8857	0.124709
Stool_refseq	1275	Kocuria_rosea	3953419	9	0	0			0
Stool_refseq	1276	Kytococcus_sedentarius	2783568	43	6	0.139535	96.3165	30.1667	0.00966386
Stool_refseq	1280	Staphylococcus_aureus	2821361	4069	16	0.00393217	97.1175	13.875	0.0358692
Stool_refseq	1281	Staphylococcus_carnosus	2571374	2	0	0			0
Stool_refseq	1282	Staphylococcus_epidermidis	2491058	187	23	0.122995	97.3663	31.6957	0.0649523
Stool_refseq	1283	Staphylococcus_haemolyticus	2572027	68	0	0			0
Stool_refseq	1284	Staphylococcus_hyicus	2472129	730	0	0			0
Stool_refseq	1285	Staphylococcus_intermedius	2891525	3	0	0			0
Stool_refseq	1286	Staphylococcus_simulans	2682239	15	0	0			0
Stool_refseq	1288	Staphylococcus_xylosus	2757557	25	0	0			0
Stool_refseq	1290	Staphylococcus_hominis	2257431	31	10	0.322581	96.6668	17	0.0266675
Stool_refseq	1292	Staphylococcus_warneri	2541629	15	2	0.133333	98.1481	42	0.00216397
Stool_refseq	1293	Staphylococcus_gallinarum	2942339	26	0	0			0
Stool_refseq	1294	Staphylococcus_muscae	2095116	1	0	0			0
Stool_refseq	1295	Staphylococcus_schleiferi	2520325	4	0	0			0
Stool_refseq	1296	Mammaliicoccus_sciuri	2811859	104	0	0			0
Stool_refseq	1299	Deinococcus_radiodurans	3279598	1	0	0			0
Stool_refseq	1302	Streptococcus_gordonii	2187618	816	401	0.491422	96.3989	29.4638	1.12616
Stool_refseq	1303	Streptococcus_oralis	1931548	1574	639	0.405972	95.8289	27.0094	1.96423
Stool_refseq	1304	Streptococcus_salivarius	2210574	16620	8905	0.5358	96.2418	29.301	16.5854
Stool_refseq	1305	Streptococcus_sanguinis	2296927	891	444	0.498316	96.9566	31.6261	1.03721
Stool_refseq	1307	Streptococcus_suis	2170808	2021	112	0.0554181	98.2793	38.4732	0.0491983
Stool_refseq	1308	Streptococcus_thermophilus	1791634	7072	6157	0.870617	99.1568	39.9022	15.6994
Stool_refseq	1309	Streptococcus_mutans	2019345	1843	1196	0.648942	99.3619	41.0426	3.73562
Stool_refseq	1310	Streptococcus_sobrinus	2198571	133	0	0			0
Stool_refseq	1311	Streptococcus_agalactiae	2079123	1214	3	0.00247117	95.4805	1.66667	0.0125053
Stool_refseq	1313	Streptococcus_pneumoniae	2110968	1353	64	0.0473023	95.6147	22.3594	0.142399
Stool_refseq	1314	Streptococcus_pyogenes	1746380	162	3	0.0185185	97.0419	1	0.0141435
Stool_refseq	1317	Streptococcus_downei	2232110	3	0	0			0
Stool_refseq	1318	Streptococcus_parasanguinis	2153652	10599	4491	0.423719	95.6662	26.3589	11.432
Stool_refseq	1322	Blautia_hansenii	3065949	13742	807	0.0587251	97.0533	30.2701	1.37263
Stool_refseq	1323	Faecalicoccus_pleomorphus	2055154	1670	133	0.0796407	96.8074	31.9774	0.287278
Stool_refseq	1326	Streptococcus_acidominimus	2445682	16	0	0			0
Stool_refseq	1328	Streptococcus_anginosus	1953654	252	18	0.0714286	97.7821	35.7222	0.0578915
Stool_refseq	1329	Streptococcus_canis	2084744	10	0	0			0
Stool_refseq	1333	Streptococcus_criceti	2431956	5	1	0.2	94.0594	23	0.00419415
Stool_refseq	1334	Streptococcus_dysgalactiae	2174327	80	0	0			0
Stool_refseq	1335	Streptococcus_equinus	1797051	238	6	0.0252101	98.0255	36.3333	0.015915
Stool_refseq	1336	Streptococcus_equi	2154778	335	0	0			0
Stool_refseq	1337	Streptococcus_hyointestinalis	2553358	41	0	0			0
Stool_refseq	1338	Streptococcus_intermedius	1932951	297	184	0.619529	98.7075	39.7663	0.531364
Stool_refseq	1339	Streptococcus_macacae	1930691	17	0	0			0
Stool_refseq	1340	Streptococcus_porcinus	2033046	5	0	0			0
Stool_refseq	1341	Streptococcus_ratti	2096943	16	0	0			0
Stool_refseq	1343	Streptococcus_vestibularis	1950305	310	193	0.622581	97.7145	32.5699	0.605546
Stool_refseq	1345	Streptococcus_ferus	1872314	5	0	0			0
Stool_refseq	1346	Streptococcus_iniae	2086959	30	0	0			0
Stool_refseq	1348	Streptococcus_parauberis	2164480	23	0	0			0
Stool_refseq	1349	Streptococcus_uberis	1975601	63	1	0.015873	93.9394	23	0.00506175
Stool_refseq	1351	Enterococcus_faecalis	2870381	898	9	0.0100223	98.1374	41.1111	0.0149109
Stool_refseq	1352	Enterococcus_faecium	2919198	6262	1	0.000159693	96.5517	1	0.0020211
Stool_refseq	1353	Enterococcus_gallinarum	3488294	59	0	0			0
Stool_refseq	1354	Enterococcus_hirae	2845651	94	0	0			0
Stool_refseq	1355	Enterococcus_columbae	2545099	844	536	0.635071	93.6302	14.1045	0.0366194
Stool_refseq	1356	Enterococcus_sulfureus	2301651	18	0	0			0
Stool_refseq	1358	Lactococcus_lactis	2639081	738	29	0.0392954	98.6863	40.2759	0.0629765
Stool_refseq	1359	Lactococcus_cremoris	2427048	65	13	0.2	97.9517	36.3846	0.0276468
Stool_refseq	1363	Lactococcus_garvieae	2084337	39	0	0			0
Stool_refseq	1365	Lactococcus_plantarum	1977763	3	0	0			0
Stool_refseq	1366	Lactococcus_raffinolactis	2295672	21	0	0			0
Stool_refseq	1371	Marinococcus_halophilus	3266249	15	0	0			0
Stool_refseq	1373	Planococcus_citreus	3429284	2	0	0			0
Stool_refseq	1376	Aerococcus_urinae	1974262	46	0	0			0
Stool_refseq	1377	Aerococcus_viridans	2199877	17	2	0.117647	92	3	0.00459117
Stool_refseq	1379	Gemella_haemolysans	1905342	167	68	0.407186	96.7812	29.7941	0.169366
Stool_refseq	1382	Lancefieldella_parvula	1543805	341	170	0.498534	96.5394	30.3941	0.63039
Stool_refseq	1383	Lancefieldella_rimae	1626291	91	18	0.197802	97.1326	32.6667	0.0763701
Stool_refseq	1390	Bacillus_amyloliquefaciens	4149690	10	0	0			0
Stool_refseq	1391	Aneurinibacillus_aneurinilyticus	5313859	37	0	0			0
Stool_refseq	1392	Bacillus_anthracis	5503926	28	2	0.0714286	96.5347	1	0.00214392
Stool_refseq	1393	Brevibacillus_brevis	6726998	42	0	0			0
Stool_refseq	1396	Bacillus_cereus	5836971	359	3	0.00835655	97.6432	1	0.0039918
Stool_refseq	1397	Niallia_circulans	5179558	388	0	0			0
Stool_refseq	1398	Weizmannia_coagulans	3366995	58	0	0			0
Stool_refseq	1399	Cytobacillus_firmus	4803910	97	0	0			0
Stool_refseq	1401	Paenibacillus_lautus	7062432	103	0	0			0
Stool_refseq	1402	Bacillus_licheniformis	4227253	15	0	0			0
Stool_refseq	1404	Priestia_megaterium	5746548	238	0	0			0
Stool_refseq	1405	Bacillus_mycoides	5697065	44	0	0			0
Stool_refseq	1406	Paenibacillus_polymyxa	5967522	111	0	0			0
Stool_refseq	1407	Peribacillus_psychrosaccharolyticus	4681292	73	0	0			0
Stool_refseq	1408	Bacillus_pumilus	3704641	257	0	0			0
Stool_refseq	1409	Bacillus_sp._-in-_Bacteria-	3584858	1	0	0			0
Stool_refseq	1411	Alkalihalobacillus_akibai	4740369	9	0	0			0
Stool_refseq	1413	Evansella_cellulosilytica	4681672	69	2	0.0289855	94	23	0.00108935
Stool_refseq	1418	Caldalkalibacillus_mannanilyticus	4534596	131	0	0			0
Stool_refseq	1421	Lysinibacillus_sphaericus	4681723	30	0	0			0
Stool_refseq	1422	Geobacillus_stearothermophilus	2744723	21	2	0.0952381	96.5347	32	0.00539217
Stool_refseq	1423	Bacillus_subtilis	4215606	784	10	0.0127551	96.3625	17.5	0.0139719
Stool_refseq	1426	Parageobacillus_thermoglucosidasius	4004923	183	3	0.0163934	99.3399	28.3333	0.00402005
Stool_refseq	1428	Bacillus_thuringiensis	6260142	520	2	0.00384615	95.0495	23.5	0.00325871
Stool_refseq	1445	Alkalihalobacillus_alcalophilus	4210001	17	0	0			0
Stool_refseq	1449	Amphibacillus_xylanus	2569486	10	2	0.2	100	42	0.00470911
Stool_refseq	1450	Alicyclobacillus_acidoterrestris	4346939	13	0	0			0
Stool_refseq	1451	Paenibacillus_amylolyticus	7361451	71	0	0			0
Stool_refseq	1452	Bacillus_atrophaeus	4292910	25372	0	0			0
Stool_refseq	1454	Schinkia_azotoformans	4472104	30	0	0			0
Stool_refseq	1455	Bacillus_badius	3963196	69	0	0			0
Stool_refseq	1456	Bacillus_benzoevorans	4701532	64	0	0			0
Stool_refseq	1458	Metabacillus_fastidiosus	4410645	34	4	0.117647	92.3747	3	0.001315
Stool_refseq	1459	Sporosarcina_globispora	5673948	7	0	0			0
Stool_refseq	1461	Psychrobacillus_insolitus	3288307	7	0	0			0
Stool_refseq	1462	Geobacillus_kaustophilus	3592666	15	0	0			0
Stool_refseq	1464	Paenibacillus_larvae	4378174	40	0	0			0
Stool_refseq	1465	Brevibacillus_laterosporus	5400144	42	0	0			0
Stool_refseq	1467	Lederbergia_lenta	4384366	3	0	0			0
Stool_refseq	1471	Bacillus_methanolicus	3426513	96	0	0			0
Stool_refseq	1472	Paenibacillus_pabuli	7329063	154	1	0.00649351	90.9091	3	0.000764081
Stool_refseq	1473	Virgibacillus_pantothenticus	4761851	12	0	0			0
Stool_refseq	1474	Sporosarcina_pasteurii	3298318	9	0	0			0
Stool_refseq	1478	Peribacillus_simplex	5645783	35	0	0			0
Stool_refseq	1479	Bacillus_smithii	3381292	12	0	0			0
Stool_refseq	1482	Virgibacillus_halodenitrificans	3917759	99	0	0			0
Stool_refseq	1484	Hydrogenibacillus_schlegelii	2608908	1	0	0			0
Stool_refseq	1488	Clostridium_acetobutylicum	4145581	16	0	0			0
Stool_refseq	1490	Paraclostridium_bifermentans	3566216	190	2	0.0105263	98.7805	17	0.0023274
Stool_refseq	1491	Clostridium_botulinum	3903260	514	1	0.00194553	92.0792	3	0.0026132
Stool_refseq	1492	Clostridium_butyricum	4705596	335	0	0			0
Stool_refseq	1493	Clostridium_cellulovorans	5262222	160	0	0			0
Stool_refseq	1494	Clostridium_cochlearium	2435419	105	2	0.0190476	98.0198	41	0.00747305
Stool_refseq	1495	Clostridium_cylindrosporum	2735032	33	0	0			0
Stool_refseq	1496	Clostridioides_difficile	4095894	18823	87	0.004622	96.5473	15.6322	0.120389
Stool_refseq	1497	Clostridium_formicaceticum	4586728	117	0	0			0
Stool_refseq	1498	Hathewaya_histolytica	2740791	86	0	0			0
Stool_refseq	1499	Ruminiclostridium_josui	4469680	145	0	0			0
Stool_refseq	1501	Clostridium_pasteurianum	4352852	145	0	0			0
Stool_refseq	1502	Clostridium_perfringens	3355233	2179	336	0.154199	97.6266	35.5595	0.493885
Stool_refseq	1503	Gottschalkia_purinilytica	3397304	48	0	0			0
Stool_refseq	1504	Clostridium_septicum	3404718	113	6	0.0530973	94.5376	10.3333	0.00898753
Stool_refseq	1505	Paeniclostridium_sordellii	3534945	536	21	0.0391791	95.9595	27.4286	0.011061
Stool_refseq	1509	Clostridium_sporogenes	4141984	287	0	0			0
Stool_refseq	1510	Thermoclostridium_stercorarium	2974379	176	0	0			0
Stool_refseq	1511	Acetoanaerobium_sticklandii	2715461	108	0	0			0
Stool_refseq	1512	#NAME?	5072209	57528	41258	0.717181	99.4049	40.5286	37.3738
Stool_refseq	1513	Clostridium_tetani	2873333	170	0	0			0
Stool_refseq	1515	Acetivibrio_thermocellus	3843301	308	0	0			0
Stool_refseq	1516	Thermoanaerobacter_thermohydrosulfuricus	2683588	3	0	0			0
Stool_refseq	1517	Thermoanaerobacterium_thermosaccharolyticum	2785752	61	0	0			0
Stool_refseq	1519	Clostridium_tyrobutyricum	3134437	328	0	0			0
Stool_refseq	1520	Clostridium_beijerinckii	5950247	359	0	0			0
Stool_refseq	1521	Ruminiclostridium_cellulolyticum	4068724	190	0	0			0
Stool_refseq	1522	#NAME?	4513882	13435	1698	0.126386	96.9012	31.7538	1.74725
Stool_refseq	1525	Moorella_thermoacetica	2623349	58	0	0			0
Stool_refseq	1526	#NAME?	3113820	2137	119	0.0556855	94.7971	19.521	0.110957
Stool_refseq	1527	Anaerocolumna_aminovalerica	4630141	1141	193	0.16915	96.3067	30.7098	0.0356145
Stool_refseq	1528	Eubacterium_barkeri	2954329	205	8	0.0390244	96.4816	33.75	0.00690512
Stool_refseq	1529	Clostridium_cadaveris	3625784	755	607	0.803974	99.2851	40.6969	0.437561
Stool_refseq	1530	Clostridium_carnis	5168057	41	34	0.829268	99.0749	39.3824	0.025677
Stool_refseq	1531	Enterocloster_clostridioformis	5539047	33796	21753	0.643656	99.4134	39.2946	20.8606
Stool_refseq	1532	Blautia_coccoides	6097890	1082	70	0.064695	98.3451	33.6857	0.0671872
Stool_refseq	1533	Clostridium_fallax	2747337	53	6	0.113208	96.9231	40	0.00240233
Stool_refseq	1534	Clostridium_kluyveri	3955303	134	0	0			0
Stool_refseq	1537	Romboutsia_lituseburensis	3782458	257	15	0.0583658	95.1838	23.8	0.0173432
Stool_refseq	1538	Clostridium_ljungdahlii	4630065	41	0	0			0
Stool_refseq	1540	Clostridioides_mangenotii	2960967	197	0	0			0
Stool_refseq	1541	Terrisporobacter_mayombei	4064271	89	13	0.146067	95.0724	21.9231	0.0197083
Stool_refseq	1542	Clostridium_novyi	2499078	127	0	0			0
Stool_refseq	1544	Faecalicatena_orotica	5187896	421	10	0.023753	93.943	13.7	0.012028
Stool_refseq	1547	Erysipelatoclostridium_ramosum	3543719	1874	219	0.116862	98.4481	37.2922	0.292715
Stool_refseq	1548	Clostridium_scatologenes	5749410	11	0	0			0
Stool_refseq	1553	Clostridium_tetanomorphum	4475070	51	0	0			0
Stool_refseq	1556	Gottschalkia_acidurici	3108248	70	0	0			0
Stool_refseq	1557	Peptoclostridium_litorale	3404633	65	0	0			0
Stool_refseq	1559	Clostridium_tertium	3874184	87	1	0.0114943	93.0693	8	0.00263281
Stool_refseq	1561	Clostridium_baratii	3211717	202	9	0.0445545	96.8351	35	0.0117383
Stool_refseq	1563	Desulfosporosinus_orientis	5863081	43	0	0			0
Stool_refseq	1564	Desulforamulus_ruminis	3969014	45	0	0			0
Stool_refseq	1565	Desulfotomaculum_nigrificans	2892255	51	0	0			0
Stool_refseq	1566	Desulfofundulus_australicus	2881643	1	0	0			0
Stool_refseq	1570	Halobacillus_halophilus	4170008	6	0	0			0
Stool_refseq	1571	Sporosarcina_ureae	3362333	11	0	0			0
Stool_refseq	1575	Leifsonia_xyli	2686418	1	0	0			0
Stool_refseq	1579	Lactobacillus_acidophilus	1978847	13	4	0.307692	100	42	0.00813605
Stool_refseq	1580	Levilactobacillus_brevis	2494328	52	0	0			0
Stool_refseq	1581	Lentilactobacillus_buchneri	2537205	45	1	0.0222222	92.8571	3	0.0032319
Stool_refseq	1582	Lacticaseibacillus_casei	2952961	12	6	0.5	97.6898	14.6667	0.0102609
Stool_refseq	1583	Weissella_confusa	2216758	323	11	0.0340557	99.64	42	0.0339234
Stool_refseq	1584	Lactobacillus_delbrueckii	1891796	60	13	0.216667	96.8916	30.6154	0.0353104
Stool_refseq	1587	Lactobacillus_helveticus	2055814	660	24	0.0363636	92.8132	10.8333	0.0454808
Stool_refseq	1588	Lentilactobacillus_hilgardii	3190226	22	0	0			0
Stool_refseq	1589	Lactiplantibacillus_pentosus	3671373	822	3	0.00364964	91.4555	3	0.00454871
Stool_refseq	1590	Lactiplantibacillus_plantarum	3223643	109	2	0.0183486	98.2456	1	0.00359841
Stool_refseq	1596	Lactobacillus_gasseri	1894360	2124	352	0.165725	96.0043	27.8182	0.88262
Stool_refseq	1597	Lacticaseibacillus_paracasei	3025352	187	60	0.320856	97.4573	35.6833	0.0940056
Stool_refseq	1598	Limosilactobacillus_reuteri	2220255	308	87	0.282468	97.4997	33.6437	0.0987724
Stool_refseq	1599	Latilactobacillus_sakei	2018071	11	2	0.181818	92.0792	3	0.00505433
Stool_refseq	1600	Lactobacillus_acetotolerans	1683905	61	0	0			0
Stool_refseq	1601	Ligilactobacillus_agilis	2162388	165	3	0.0181818	95.576	28.6667	0.00864785
Stool_refseq	1602	Companilactobacillus_alimentarius	2401923	11	0	0			0
Stool_refseq	1604	Lactobacillus_amylovorus	1977087	8	0	0			0
Stool_refseq	1605	Ligilactobacillus_animalis	1906794	5	0	0			0
Stool_refseq	1606	Ligilactobacillus_aviarius	1680526	6	0	0			0
Stool_refseq	1607	Loigolactobacillus_bifermentans	3274863	14	0	0			0
Stool_refseq	1610	Loigolactobacillus_coryniformis	2951508	28	0	0			0
Stool_refseq	1612	Companilactobacillus_farciminis	2551839	4	0	0			0
Stool_refseq	1613	Limosilactobacillus_fermentum	2103331	1670	833	0.498802	99.0421	39.5906	1.8175
Stool_refseq	1614	Fructilactobacillus_fructivorans	1332231	22	0	0			0
Stool_refseq	1615	Weissella_halotolerans	1358385	1	0	0			0
Stool_refseq	1616	Weissella_kandleri	1334438	141	0	0			0
Stool_refseq	1618	Liquorilactobacillus_mali	2611959	23	0	0			0
Stool_refseq	1620	Weissella_minor	1768499	48	0	0			0
Stool_refseq	1622	Ligilactobacillus_murinus	2290452	140	5	0.0357143	92.8444	7.4	0.00602501
Stool_refseq	1623	Ligilactobacillus_ruminis	2066652	4002	24	0.005997	95.9639	28.625	0.0248228
Stool_refseq	1624	Ligilactobacillus_salivarius	2071255	344	0	0			0
Stool_refseq	1625	Fructilactobacillus_sanfranciscensis	1360847	5	2	0.4	98.1818	42	0.00411508
Stool_refseq	1626	Lacticaseibacillus_sharpeae	2444304	41	0	0			0
Stool_refseq	1629	Weissella_viridescens	1593241	32	0	0			0
Stool_refseq	1630	Kandleria_vitulina	2126709	351	23	0.0655271	93.9236	5.3913	0.0195137
Stool_refseq	1631	Fructobacillus_fructosus	1401260	13	0	0			0
Stool_refseq	1632	Limosilactobacillus_oris	2007883	1666	1157	0.694478	97.3736	35.0787	2.81819
Stool_refseq	1633	Limosilactobacillus_vaginalis	1883554	33	2	0.0606061	100	42	0.00292001
Stool_refseq	1638	Listeria_ivanovii	2919548	3	0	0			0
Stool_refseq	1639	Listeria_monocytogenes	2944528	211	5	0.0236967	95.9973	1	0.0114789
Stool_refseq	1640	Listeria_seeligeri	2797636	37	0	0			0
Stool_refseq	1641	Listeria_grayi	2751104	16	1	0.0625	91.1392	2	0.00276253
Stool_refseq	1642	Listeria_innocua	2887185	57	0	0			0
Stool_refseq	1643	Listeria_welshimeri	2814137	10	0	0			0
Stool_refseq	1646	Renibacterium_salmoninarum	3155250	3	0	0			0
Stool_refseq	1648	Erysipelothrix_rhusiopathiae	1787941	7	0	0			0
Stool_refseq	1650	Kurthia_zopfii	2991625	14	0	0			0
Stool_refseq	1652	Alloiococcus_otitis	1806596	22	2	0.0909091	100	42	0.00326581
Stool_refseq	1655	Actinomyces_naeslundii	3152123	62	40	0.645161	98.1094	37.15	0.0701432
Stool_refseq	1656	Actinomyces_viscosus	3491241	10	0	0			0
Stool_refseq	1657	Actinobaculum_suis	2368602	1	0	0			0
Stool_refseq	1658	Actinomyces_bovis	2595566	31	0	0			0
Stool_refseq	1659	Actinomyces_israelii	3980311	11	5	0.454545	98.5197	41.6	0.00721049
Stool_refseq	1660	Schaalia_odontolytica	2455831	1267	196	0.154696	94.9241	20.4796	0.486923
Stool_refseq	1661	Trueperella_pyogenes	2295822	289	3	0.0103806	95.0206	18.6667	0.00714341
Stool_refseq	1664	Arthrobacter_glacialis	4249516	4	0	0			0
Stool_refseq	1665	Arthrobacter_globiformis	4954410	21	0	0			0
Stool_refseq	1670	Arthrobacter_citreus	3553729	7	0	0			0
Stool_refseq	1672	Arthrobacter_ramosus	5251250	1	0	0			0
Stool_refseq	1673	Rhizobium_viscosum	7069622	2	0	0			0
Stool_refseq	1677	Arthrobacter_pascens	4634886	6	0	0			0
Stool_refseq	1680	Bifidobacterium_adolescentis	2089645	49203	21780	0.442656	98.0048	37.5402	29.4434
Stool_refseq	1681	Bifidobacterium_bifidum	2193720	126131	116299	0.922049	99.1053	40.7104	85.5228
Stool_refseq	1683	Bifidobacterium_angulatum	2021974	55	29	0.527273	97.7368	36.0345	0.0743333
Stool_refseq	1684	Bifidobacterium_asteroides	2190368	25	2	0.08	95.6044	24	0.00420021
Stool_refseq	1685	Bifidobacterium_breve	2269415	55152	33412	0.605817	98.3645	38.8643	25.3055
Stool_refseq	1686	Bifidobacterium_catenulatum	2079525	1360	493	0.3625	98.1371	37.1846	0.718001
Stool_refseq	1688	Bifidobacterium_cuniculi	2531592	12	1	0.0833333	94	23	0.00398958
Stool_refseq	1689	Bifidobacterium_dentium	2635669	4818	3610	0.749274	98.3814	39.8025	8.08774
Stool_refseq	1692	Bifidobacterium_magnum	1825255	131	4	0.0305344	91.8028	3	0.00936855
Stool_refseq	1693	Bifidobacterium_minimum	1867315	12	0	0			0
Stool_refseq	1694	Bifidobacterium_pseudolongum	1978157	231	79	0.341991	99.0486	40.7342	0.0237595
Stool_refseq	1697	Corynebacterium_ammoniagenes	2790185	13	1	0.0769231	97.0297	40	0.00365567
Stool_refseq	1698	Brevibacterium_epidermidis	3703261	1	0	0			0
Stool_refseq	1703	Brevibacterium_linens	3814300	1	0	0			0
Stool_refseq	1705	Corynebacterium_stationis	2862233	1	0	0			0
Stool_refseq	1708	Cellulomonas_fimi	4266344	11	0	0			0
Stool_refseq	1709	Cellulomonas_biazotea	4407465	6	0	0			0
Stool_refseq	1710	Cellulosimicrobium_cellulans	4411608	21	0	0			0
Stool_refseq	1711	Cellulomonas_flavigena	4123179	18	0	0			0
Stool_refseq	1714	Cellulomonas_uda	3567340	2	0	0			0
Stool_refseq	1717	Corynebacterium_diphtheriae	2463666	9	0	0			0
Stool_refseq	1718	Corynebacterium_glutamicum	3309401	16	2	0.125	100	42	0.00277996
Stool_refseq	1719	Corynebacterium_pseudotuberculosis	2337763	22	0	0			0
Stool_refseq	1721	Corynebacterium_callunae	2928683	1	0	0			0
Stool_refseq	1724	Corynebacterium_renale	2335089	7	0	0			0
Stool_refseq	1725	Corynebacterium_xerosis	2686219	10	0	0			0
Stool_refseq	1727	Corynebacterium_variabile	3192709	7	0	0			0
Stool_refseq	1731	Peptoclostridium_acidaminophilum	3055036	271	0	0			0
Stool_refseq	1732	Eubacterium_oxidoreducens	2912287	1572	264	0.167939	94.8277	19.9886	0.0556264
Stool_refseq	1735	Holdemanella_biformis	2477128	1974	363	0.183891	96.3385	29.3939	0.610061
Stool_refseq	1736	Eubacterium_limosum	4422837	248	3	0.0120968	98.9233	42	0.00644383
Stool_refseq	1737	#NAME?	2943107	33	2	0.0606061	97.0297	40	0.00346573
Stool_refseq	1744	Propionibacterium_freudenreichii	2507188	14	0	0			0
Stool_refseq	1747	Cutibacterium_acnes	2494738	1475	1173	0.795254	98.6042	38.5388	2.36867
Stool_refseq	1748	Acidipropionibacterium_acidipropionici	3651382	11	0	0			0
Stool_refseq	1749	Acidipropionibacterium_jensenii	2999408	16	0	0			0
Stool_refseq	1750	Arachnia_propionica	3402349	71	46	0.647887	99.4336	41.1739	0.0474966
Stool_refseq	1751	Acidipropionibacterium_thoenii	2938072	6	0	0			0
Stool_refseq	1764	Mycobacterium_avium	5173839	20	0	0			0
Stool_refseq	1766	Mycolicibacterium_fortuitum	6406072	10	0	0			0
Stool_refseq	1767	Mycobacterium_intracellulare	5645778	3	0	0			0
Stool_refseq	1768	Mycobacterium_kansasii	6577228	2	0	0			0
Stool_refseq	1769	Mycobacterium_leprae	3187112	3	0	0			0
Stool_refseq	1771	Mycolicibacterium_phlei	5313907	3	0	0			0
Stool_refseq	1772	Mycolicibacterium_smegmatis	6895172	4	0	0			0
Stool_refseq	1773	Mycobacterium_tuberculosis	4411532	73	2	0.0273973	94.2473	23.5	0.00172276
Stool_refseq	1774	Mycobacteroides_chelonae	5029817	6	0	0			0
Stool_refseq	1775	Mycobacterium_cookii	5318517	7	0	0			0
Stool_refseq	1776	Mycolicibacterium_flavescens	5973602	8	0	0			0
Stool_refseq	1778	Mycobacterium_gordonae	7601632	23	4	0.173913	99.6324	42	0.0009077
Stool_refseq	1780	Mycobacterium_malmoense	5319859	8	0	0			0
Stool_refseq	1781	Mycobacterium_marinum	6450522	3	0	0			0
Stool_refseq	1782	Mycolicibacter_nonchromogenicus	4465329	11	0	0			0
Stool_refseq	1783	Mycobacterium_scrofulaceum	6170273	22	0	0			0
Stool_refseq	1784	Mycobacterium_simiae	5788994	35	0	0			0
Stool_refseq	1786	Mycolicibacterium_sphagni	6066978	5	0	0			0
Stool_refseq	1787	Mycobacterium_szulgai	6672659	2	0	0			0
Stool_refseq	1788	Mycolicibacter_terrae	4566186	1	0	0			0
Stool_refseq	1789	Mycobacterium_xenopi	5251936	7	0	0			0
Stool_refseq	1790	Mycobacterium_asiaticum	5969538	43	0	0			0
Stool_refseq	1791	Mycolicibacterium_aurum	6035584	4	0	0			0
Stool_refseq	1792	Mycolicibacterium_chitae	5461769	3	0	0			0
Stool_refseq	1793	Mycolicibacterium_fallax	4156821	7	0	0			0
Stool_refseq	1795	Mycolicibacterium_neoaurum	5421267	38	0	0			0
Stool_refseq	1797	Mycolicibacterium_thermoresistibile	4950685	9	0	0			0
Stool_refseq	1798	Mycolicibacillus_trivialis	3591083	6	0	0			0
Stool_refseq	1799	Mycolicibacterium_aichiense	5925482	1	0	0			0
Stool_refseq	1800	Mycolicibacterium_chubuense	6021188	6	0	0			0
Stool_refseq	1801	Mycobacterium_diernhoferi	5998503	3	0	0			0
Stool_refseq	1807	Mycolicibacterium_obuense	5599206	21	17	0.809524	99.5261	42	0.0110194
Stool_refseq	1810	Mycolicibacterium_vaccae	6235754	10	0	0			0
Stool_refseq	1814	Amycolatopsis_methanolica	7237391	1	0	0			0
Stool_refseq	1816	Actinokineospora_fastidiosa	7042850	1	0	0			0
Stool_refseq	1822	Nocardia_vaccinii	9224040	19	0	0			0
Stool_refseq	1823	Nocardia_otitidiscaviarum	7687583	49	0	0			0
Stool_refseq	1824	Nocardia_asteroides	6983363	108	0	0			0
Stool_refseq	1828	Rhodococcus_fascians	5519954	14	0	0			0
Stool_refseq	1829	Rhodococcus_rhodochrous	5612657	2	0	0			0
Stool_refseq	1830	Rhodococcus_ruber	5698851	11	0	0			0
Stool_refseq	1833	Rhodococcus_erythropolis	6806506	1	0	0			0
Stool_refseq	1836	Saccharopolyspora_erythraea	8212805	13	0	0			0
Stool_refseq	1837	Saccharopolyspora_hirsuta	7549392	7	0	0			0
Stool_refseq	1838	Saccharopolyspora_hordei	5783988	2	0	0			0
Stool_refseq	1841	Nocardioides_albus	5655249	2	0	0			0
Stool_refseq	1843	Nocardioides_jensenii	5102139	1	0	0			0
Stool_refseq	1844	Nocardioides_luteus	4956498	10	0	0			0
Stool_refseq	1848	Pseudonocardia_thermophila	6098214	24	2	0.0833333	92.5227	3	0.000901903
Stool_refseq	1850	Actinopolyspora_halophila	5353291	2	0	0			0
Stool_refseq	1852	Saccharomonospora_viridis	4308349	2	0	0			0
Stool_refseq	1861	Geodermatophilus_obscurus	5322497	12	0	0			0
Stool_refseq	1863	Dermatophilus_congolensis	2627820	5	0	0			0
Stool_refseq	1866	Actinoplanes_missouriensis	8773466	15	0	0			0
Stool_refseq	1867	Actinoplanes_teichomyceticus	8287152	18	0	0			0
Stool_refseq	1868	Actinoplanes_digitatis	9128557	22	0	0			0
Stool_refseq	1869	Actinoplanes_utahensis	9417079	11	0	0			0
Stool_refseq	1874	Micromonospora_chalcea	6861996	5	0	0			0
Stool_refseq	1877	Micromonospora_echinospora	7125866	10	0	0			0
Stool_refseq	1880	Micromonospora_olivasterospora	7071760	10	0	0			0
Stool_refseq	1881	Micromonospora_viridifaciens	7073985	4	0	0			0
Stool_refseq	1885	Streptomyces_actuosus	8451480	6	0	0			0
Stool_refseq	1886	Streptomyces_albidoflavus	7215712	8	0	0			0
Stool_refseq	1888	Streptomyces_albus	8033415	42	0	0			0
Stool_refseq	1889	Streptomyces_ambofaciens	8393598	10	0	0			0
Stool_refseq	1890	Streptomyces_antibioticus	7978920	3	0	0			0
Stool_refseq	1892	Streptomyces_anulatus	8847108	16	0	0			0
Stool_refseq	1893	Streptomyces_atratus	9641288	17	0	0			0
Stool_refseq	1894	Kitasatospora_aureofaciens	8323899	21	0	0			0
Stool_refseq	1895	Streptomyces_avidinii	9032248	6	0	0			0
Stool_refseq	1896	Streptomyces_bikiniensis	7391008	11	0	0			0
Stool_refseq	1898	Streptomyces_cacaoi	8443444	2	0	0			0
Stool_refseq	1901	Streptomyces_clavuligerus	8544086	4	0	0			0
Stool_refseq	1904	Streptomyces_cyaneus	9833661	2	0	0			0
Stool_refseq	1905	Streptomyces_exfoliatus	7874957	26	0	0			0
Stool_refseq	1907	Streptomyces_glaucescens	8426988	34	0	0			0
Stool_refseq	1908	Streptomyces_globisporus	7783599	4	0	0			0
Stool_refseq	1911	Streptomyces_griseus	8328034	14	0	0			0
Stool_refseq	1912	Streptomyces_hygroscopicus	9682870	11	0	0			0
Stool_refseq	1914	Streptomyces_lavendulae	8932792	11	0	0			0
Stool_refseq	1915	Streptomyces_lincolnensis	10319054	4	0	0			0
Stool_refseq	1919	Streptomyces_microflavus	8452583	8	0	0			0
Stool_refseq	1920	Streptomyces_nigrescens	9534571	6	0	0			0
Stool_refseq	1923	Streptomyces_phaeochromogenes	11713170	2	0	0			0
Stool_refseq	1924	Streptomyces_purpurascens	9188115	5	0	0			0
Stool_refseq	1927	Streptomyces_rimosus	9643891	16	0	0			0
Stool_refseq	1930	Streptomyces_scabiei	10148695	8	0	0			0
Stool_refseq	1932	Streptomyces_tendae	8887909	102	87	0.852941	97.4727	32.931	0.0183508
Stool_refseq	1933	Streptoalloteichus_tenebrarius	7099767	5	0	0			0
Stool_refseq	1938	Streptomyces_viridochromogenes	7827744	10	0	0			0
Stool_refseq	1940	Streptomyces_albireticuli	8564494	18	0	0			0
Stool_refseq	1943	Streptomyces_griseoruber	10217879	20	0	0			0
Stool_refseq	1944	Streptomyces_halstedii	7849026	2	0	0			0
Stool_refseq	1945	Streptomyces_jumonjinensis	8465075	13	0	0			0
Stool_refseq	1946	Streptomyces_kasugaensis	9262443	2	0	0			0
Stool_refseq	1950	Streptomyces_peucetius	9528656	18	0	0			0
Stool_refseq	1951	Streptomyces_purpureus	7458334	5	0	0			0
Stool_refseq	1954	Streptomyces_brasiliensis	10696112	8	0	0			0
Stool_refseq	1956	Streptomyces_diastaticus	6982337	1	0	0			0
Stool_refseq	1960	Streptomyces_vinaceus	7673509	4	0	0			0
Stool_refseq	1963	Streptomyces_olivochromogenes	11669312	35	0	0			0
Stool_refseq	1967	Streptomyces_kanamyceticus	10133897	5	0	0			0
Stool_refseq	1968	Streptomyces_cellulosae	10063079	3	0	0			0
Stool_refseq	1969	Streptomyces_chartreusis	9912098	4	0	0			0
Stool_refseq	1971	Streptomyces_noursei	9857535	5	0	0			0
Stool_refseq	1990	Actinomadura_atramentaria	6710579	23	0	0			0
Stool_refseq	1992	Thermomonospora_echinospora	8649739	41	0	0			0
Stool_refseq	1993	Actinomadura_madurae	10255144	65	0	0			0
Stool_refseq	1997	Microtetraspora_fusca	9024887	6	0	0			0
Stool_refseq	1999	Planomonospora_venezuelensis	8185542	3	0	0			0
Stool_refseq	2001	Streptosporangium_roseum	10369518	12	0	0			0
Stool_refseq	2002	Streptosporangium_amethystogenes	10087134	22	0	0			0
Stool_refseq	2006	Thermobispora_bispora	4189976	72	0	0			0
Stool_refseq	2014	Nocardiopsis_dassonvillei	6541269	5	0	0			0
Stool_refseq	2017	Streptoalloteichus_hindustanus	7279383	24	0	0			0
Stool_refseq	2020	Thermomonospora_curvata	5639016	2	2	1	100	42	0.000975347
Stool_refseq	2021	Thermobifida_fusca	3642249	9	0	0			0
Stool_refseq	2024	Thermoactinomyces_intermedius	2756565	1	0	0			0
Stool_refseq	2030	Kibdelosporangium_aridum	12276125	31	0	0			0
Stool_refseq	2033	Microbacterium_testaceum	3590404	22	0	0			0
Stool_refseq	2035	Curtobacterium_flaccumfaciens	3745652	28	0	0			0
Stool_refseq	2039	Tropheryma_whipplei	925938	4	0	0			0
Stool_refseq	2041	Aeromicrobium_erythreum	3629239	1	0	0			0
Stool_refseq	2045	Pimelobacter_simplex	5637360	7	0	0			0
Stool_refseq	2047	Rothia_dentocariosa	2506025	222	176	0.792793	96.5896	31.2386	0.505222
Stool_refseq	2051	Mobiluncus_curtisii	2146480	38	0	0			0
Stool_refseq	2052	Mobiluncus_mulieris	2481783	112	0	0			0
Stool_refseq	2054	Gordonia_bronchialis	5290012	29	18	0.62069	99.7221	42	0.0175047
Stool_refseq	2055	Gordonia_terrae	5701501	3	0	0			0
Stool_refseq	2057	Sphaerobacter_thermophilus	3993764	14	0	0			0
Stool_refseq	2061	Tsukamurella_paurometabola	4479724	11	0	0			0
Stool_refseq	2064	Kitasatospora_griseola	8578408	6	0	0			0
Stool_refseq	2065	Kitasatospora_phosalacinea	7620895	6	0	0			0
Stool_refseq	2072	Saccharothrix_australiensis	7861373	21	0	0			0
Stool_refseq	2074	Pseudonocardia_autotrophica	7535285	9	0	0			0
Stool_refseq	2078	Sporolactobacillus_inulinus	3139478	6	0	0			0
Stool_refseq	2088	Anaeroplasma_bactoclasticum	2199979	34	1	0.0294118	92.8571	8	0.00259093
Stool_refseq	2095	Mycoplasma_capricolum	1010023	8	0	0			0
Stool_refseq	2096	Mycoplasma_gallisepticum	981408	1	0	0			0
Stool_refseq	2097	Mycoplasma_genitalium	580076	1	0	0			0
Stool_refseq	2098	Metamycoplasma_hominis	715165	16	0	0			0
Stool_refseq	2099	Mesomycoplasma_hyopneumoniae	897405	10	0	0			0
Stool_refseq	2100	Mesomycoplasma_hyorhinis	838863	2	0	0			0
Stool_refseq	2102	Mycoplasma_mycoides	1035494	13	2	0.153846	98.3607	1	0.011975
Stool_refseq	2104	Mycoplasma_pneumoniae	823017	5	0	0			0
Stool_refseq	2107	Mycoplasmopsis_pulmonis	962791	2	0	0			0
Stool_refseq	2109	Mycoplasmopsis_synoviae	846495	1	0	0			0
Stool_refseq	2110	Mycoplasmopsis_agalactiae	877438	9	0	0			0
Stool_refseq	2111	Metamycoplasma_arthritidis	806209	3	0	0			0
Stool_refseq	2112	Mycoplasmopsis_bovigenitalium	841512	13	0	0			0
Stool_refseq	2113	Mycoplasmopsis_californica	793841	2	0	0			0
Stool_refseq	2115	Mycoplasmopsis_fermentans	1118751	2	0	0			0
Stool_refseq	2116	Malacoplasma_iowae	1278574	86	0	0			0
Stool_refseq	2118	Mesomycoplasma_mobile	777079	11	0	0			0
Stool_refseq	2120	Mesomycoplasma_neurolyticum	1040908	5	0	0			0
Stool_refseq	2122	Mycoplasma_pirum	839829	5	0	0			0
Stool_refseq	2123	Mycoplasma_putrefaciens	832598	1	0	0			0
Stool_refseq	2124	Metamycoplasma_salivarium	728347	2	0	0			0
Stool_refseq	2127	Mesomycoplasma_collis	902877	1	0	0			0
Stool_refseq	2130	Ureaplasma_urealyticum	881828	5	0	0			0
Stool_refseq	2136	Spiroplasma_monobiae	891575	1	0	0			0
Stool_refseq	2137	Spiroplasma_apis	1160554	2	0	0			0
Stool_refseq	2138	Spiroplasma_poulsonii	1966068	1	0	0			0
Stool_refseq	2139	Spiroplasma_clarkii	1560007	6	0	0			0
Stool_refseq	2148	Acholeplasma_laidlawii	1496992	24	0	0			0
Stool_refseq	2150	Haploplasma_modicum	1219180	6	0	0			0
Stool_refseq	2151	Mesoplasma_florum	793224	98	0	0			0
Stool_refseq	2162	Methanobacterium_formicicum	2494510	15	0	0			0
Stool_refseq	2173	Methanobrevibacter_smithii	1853160	181	117	0.646409	97.3736	36.7521	0.35453
Stool_refseq	2176	Methanohalophilus_mahii	2012424	1	0	0			0
Stool_refseq	2177	Methanohalophilus_halophilus	2022959	2	0	0			0
Stool_refseq	2186	Methanothermococcus_thermolithotrophicus	1706496	12	0	0			0
Stool_refseq	2187	Methanococcus_vannielii	1720048	13	0	0			0
Stool_refseq	2188	Methanococcus_voltae	1780593	4	0	0			0
Stool_refseq	2189	Methanotorris_igneus	1854197	4	0	0			0
Stool_refseq	2190	Methanocaldococcus_jannaschii	1739927	1	0	0			0
Stool_refseq	2198	Methanoculleus_marisnigri	2478101	2	0	0			0
Stool_refseq	2201	Methanofollis_liminatans	2475100	4	0	0			0
Stool_refseq	2203	Methanospirillum_hungatei	3544738	2	0	0			0
Stool_refseq	2208	Methanosarcina_barkeri	4574907	11	0	0			0
Stool_refseq	2209	Methanosarcina_mazei	4142816	8	0	0			0
Stool_refseq	2214	Methanosarcina_acetivorans	5751492	1	0	0			0
Stool_refseq	2221	Methanolobus_tindarius	3151883	6	0	0			0
Stool_refseq	2223	Methanothrix_soehngenii	3026645	2	0	0			0
Stool_refseq	2226	Methanococcoides_methylutens	2508511	19	0	0			0
Stool_refseq	2242	Halobacterium_salinarum	2429680	8	0	0			0
Stool_refseq	2248	Halorubrum_saccharovorum	3423703	1	0	0			0
Stool_refseq	2264	Thermococcus_celer	1866819	3	0	0			0
Stool_refseq	2265	Thermococcus_litoralis	2215172	37	0	0			0
Stool_refseq	2269	Thermofilum_pendens	1813393	1	0	0			0
Stool_refseq	2285	Sulfolobus_acidocaldarius	2225959	1	0	0			0
Stool_refseq	2287	Saccharolobus_solfataricus	2658139	3	0	0			0
Stool_refseq	2290	Desulfobacter_curvatus	5644283	5	0	0			0
Stool_refseq	2291	Desulfobacter_hydrogenophilus	5157696	5	0	0			0
Stool_refseq	2292	Desulfobacter_latus	4317866	11	0	0			0
Stool_refseq	2293	Desulfobacter_postgatei	3974658	38	0	0			0
Stool_refseq	2296	Desulforapulum_autotrophicum	5657782	13	0	0			0
Stool_refseq	2298	Desulfocicer_vacuolatum	5035799	32	0	0			0
Stool_refseq	2317	Methanosphaera_stadtmanae	1767403	1	0	0			0
Stool_refseq	2320	Methanopyrus_kandleri	1694969	1	0	0			0
Stool_refseq	2322	Methanohalobium_evestigatum	2406232	8	0	0			0
Stool_refseq	2325	Thermoanaerobacter_kivui	2397824	4	0	0			0
Stool_refseq	2331	Halanaerobium_praevalens	2309262	5	0	0			0
Stool_refseq	2337	Thermotoga_neapolitana	1884562	5	0	0			0
Stool_refseq	2340	Solemya_velum_gill_symbiont	2629178	4	0	0			0
Stool_refseq	2350	Haliscomenobacter_hydrossis	8771651	87	1	0.0114943	96.0396	1	0.00116284
Stool_refseq	2352	Flexistipes_sinusarabici	2526590	123	0	0			0
Stool_refseq	2355	unidentified_bacterial_endosymbiont	1661850	12	0	0			0
Stool_refseq	2358	Desulfomonile_tiedjei	6527027	3	0	0			0
Stool_refseq	2360	Bathymodiolus_thermophilus_thioautotrophic_gill_symbiont	2832685	7	0	0			0
Stool_refseq	2369	Arhodomonas_aquaeolei	3957769	12	0	0			0
Stool_refseq	2371	Xylella_fastidiosa	2600197	7	0	0			0
Stool_refseq	2374	Acetonema_longum	4323011	105	0	0			0
Stool_refseq	2377	Sporomusa_termitida	5316008	50	0	0			0
Stool_refseq	2378	Sporomusa_ovata	5433971	29	0	0			0
Stool_refseq	2382	Acetitomaculum_ruminis	3082721	1056	30	0.0284091	93.3361	12.7	0.0320172
Stool_refseq	2421	Thermosipho_africanus	2016657	8	0	0			0
Stool_refseq	2424	Fervidobacterium_nodosum	1948941	1	0	0			0
Stool_refseq	2426	Teredinibacter_turnerae	5348823	27	0	0			0
Stool_refseq	2434	Roseobacter_denitrificans	4308791	4	0	0			0
Stool_refseq	2698	Heliobacterium_chlorum	4147899	36	0	0			0
Stool_refseq	2699	Heliomicrobium_gestii	3685747	82	0	0			0
Stool_refseq	2702	Gardnerella_vaginalis	1667406	200	4	0.02	94.6937	23.25	0.0156531
Stool_refseq	2718	Cardiobacterium_hominis	2670755	136	69	0.507353	98.2796	35.3623	0.171262
Stool_refseq	2724	Hirschia_baltica	3540114	7	0	0			0
Stool_refseq	2734	Symbiobacterium_thermophilum	3566135	40	0	0			0
Stool_refseq	2736	Verrucomicrobium_spinosum	8220857	34	0	0			0
Stool_refseq	2738	Vagococcus_fluvialis	2651514	51	0	0			0
Stool_refseq	2739	Vagococcus_salmoninarum	3104446	2	0	0			0
Stool_refseq	2741	Peptococcus_niger	1968473	48	2	0.0416667	93.7669	13.5	0.00518168
Stool_refseq	2743	Marinobacter_nauticus	3989480	11	0	0			0
Stool_refseq	2746	Halomonas_elongata	4061825	20	0	0			0
Stool_refseq	2748	Carnobacterium_divergens	2629627	17	0	0			0
Stool_refseq	2749	Carnobacterium_gallinarum	4041428	3	0	0			0
Stool_refseq	2750	Carnobacterium_mobile	2632867	26	0	0			0
Stool_refseq	2751	Carnobacterium_maltaromaticum	3502975	63	0	0			0
Stool_refseq	2752	Carnobacterium_funditum	2352439	1	0	0			0
Stool_refseq	2754	Synergistes_jonesii	2741240	39	0	0			0
Stool_refseq	2756	Brochothrix_thermosphacta	2578375	16	0	0			0
Stool_refseq	2757	Brochothrix_campestris	2324176	8	0	0			0
Stool_refseq	12917	Acidovorax_facilis	6424669	2	2	1	99.505	42	0.00317526
Stool_refseq	13076	Globicatella_sanguinis	2622382	1	0	0			0
Stool_refseq	13160	Brevundimonas_bullata	3484100	2	0	0			0
Stool_refseq	13243	Rarobacter_faecitabidus	2804931	4	0	0			0
Stool_refseq	13264	Brachyspira_innocens	3281611	60	0	0			0
Stool_refseq	13276	Suttonella_indologenes	2507163	1	0	0			0
Stool_refseq	13335	Anaerobiospirillum_succiniciproducens	3804739	53	4	0.0754717	96.3636	24	0.00147185
Stool_refseq	13373	Burkholderia_mallei	5834748	3	0	0			0
Stool_refseq	13656	Rhizorhapis_suberifaciens	3360228	6	0	0			0
Stool_refseq	13690	Sphingobium_yanoikuyae	5532633	26	6	0.230769	96.7785	35	0.00477169
Stool_refseq	13725	Thiocystis_violacea	5368928	23	0	0			0
Stool_refseq	13773	Pyrobaculum_aerophilum	2222430	2	0	0			0
Stool_refseq	28025	Bifidobacterium_animalis	1938483	1001	36	0.035964	99.4499	39.8333	0.134538
Stool_refseq	28026	Bifidobacterium_pseudocatenulatum	2313752	29429	20027	0.680519	98.5409	38.099	24.3018
Stool_refseq	28028	Corynebacterium_flavescens	2758653	4	0	0			0
Stool_refseq	28031	Lysinibacillus_fusiformis	4843789	19	0	0			0
Stool_refseq	28034	Sulfobacillus_thermosulfidooxidans	3861015	14	0	0			0
Stool_refseq	28037	Streptococcus_mitis	1906344	1686	421	0.249703	95.2703	23.4513	1.24657
Stool_refseq	28038	Latilactobacillus_curvatus	1916521	31	9	0.290323	99.3211	42	0.0195145
Stool_refseq	28042	Saccharopolyspora_rectivirgula	3961468	9	0	0			0
Stool_refseq	28044	Streptomyces_longisporoflavus	9802249	593	290	0.489039	95.0781	23.0759	0.00499885
Stool_refseq	28047	Mycolicibacterium_confluentis	5876557	12	0	0			0
Stool_refseq	28051	Lachnospira_multipara	2871860	2157	215	0.0996755	96.3142	27.6047	0.126294
Stool_refseq	28052	Lachnospira_pectinoschiza	2704308	698014	2835	0.00406152	93.7629	14.5601	1.37033
Stool_refseq	28064	Heliobacterium_mobile	4116862	41	0	0			0
Stool_refseq	28066	Rhodoferax_fermentans	4467741	2	0	0			0
Stool_refseq	28068	Rubrivivax_gelatinosus	5075359	35	0	0			0
Stool_refseq	28072	Nostoc_sp._PCC_7524	6718869	5	0	0			0
Stool_refseq	28077	Nitrospirillum_amazonense	6874351	57	0	0			0
Stool_refseq	28080	Campylobacter_upsaliensis	1628950	36	0	0			0
Stool_refseq	28082	Legionella_anisa	4362280	2	0	0			0
Stool_refseq	28083	Legionella_birminghamensis	3789238	45	0	0			0
Stool_refseq	28085	Legionella_cincinnatiensis	4098995	4	0	0			0
Stool_refseq	28087	Legionella_sainthelensi	4597280	13	0	0			0
Stool_refseq	28088	Legionella_wadsworthii	3602617	7	0	0			0
Stool_refseq	28090	Acinetobacter_lwoffii	3528101	573	0	0			0
Stool_refseq	28091	Neisseria_weaveri	2238481	12	0	0			0
Stool_refseq	28092	Robbsia_andropogonis	6828120	8	0	0			0
Stool_refseq	28094	Trinickia_caryophylli	6589281	16	0	0			0
Stool_refseq	28095	Burkholderia_gladioli	8201484	54	0	0			0
Stool_refseq	28099	Agrobacterium_rubi	5293384	6	0	0			0
Stool_refseq	28101	Phyllobacterium_myrsinacearum	5424106	22	0	0			0
Stool_refseq	28104	Mesorhizobium_huakuii	7212699	1	0	0			0
Stool_refseq	28107	Pseudoalteromonas_espejiana	4500451	1	0	0			0
Stool_refseq	28108	Alteromonas_macleodii	4867393	16	0	0			0
Stool_refseq	28109	Pseudoalteromonas_nigrifaciens	4274777	1	0	0			0
Stool_refseq	28110	Francisella_philomiragia	2017543	130	0	0			0
Stool_refseq	28111	Bacteroides_eggerthii	4206509	1020036	765765	0.750724	98.9123	40.0552	50.4037
Stool_refseq	28112	Tannerella_forsythia	3405521	220	1	0.00454545	93.9394	23	0.00293641
Stool_refseq	28113	Bacteroides_heparinolyticus	3608975	4951	697	0.14078	94.2164	14.3816	0.355226
Stool_refseq	28114	Porphyromonas_levii	2261978	2443	780	0.31928	98.092	36.2	0.401153
Stool_refseq	28115	Porphyromonas_macacae	2214526	157	2	0.0127389	93.6895	13.5	0.0067283
Stool_refseq	28116	Bacteroides_ovatus	6472489	681090	262368	0.385218	97.3116	34.5832	32.5255
Stool_refseq	28117	Alistipes_putredinis	2550678	3529930	3285055	0.930629	99.3271	40.3308	85.3035
Stool_refseq	28118	Odoribacter_splanchnicus	4392177	816319	657354	0.805266	99.4073	40.4576	89.0087
Stool_refseq	28119	Bacteroides_zoogleoformans	3361794	3092	349	0.112872	94.9779	17.5587	0.291273
Stool_refseq	28123	Porphyromonas_asaccharolytica	2186370	998	737	0.738477	96.385	27.8915	2.0964
Stool_refseq	28124	Porphyromonas_endodontalis	2102930	23	0	0			0
Stool_refseq	28125	Prevotella_bivia	2521238	872	330	0.37844	97.6259	38.6182	0.200774
Stool_refseq	28126	Prevotella_buccae	3284105	86	22	0.255814	95.8909	27.7273	0.0419292
Stool_refseq	28127	Prevotella_buccalis	3307707	7688	6788	0.882934	98.9356	38.2652	2.28536
Stool_refseq	28128	Prevotella_corporis	2800206	785	651	0.829299	98.9725	34.9462	1.18073
Stool_refseq	28129	Prevotella_denticola	3106544	379	30	0.0791557	95.1505	11.1333	0.0588435
Stool_refseq	28130	Prevotella_disiens	3051352	3347	3031	0.905587	99.0772	39.6763	4.63794
Stool_refseq	28131	Prevotella_intermedia	2674170	1758	15	0.00853242	95.7425	13	0.0517544
Stool_refseq	28132	Prevotella_melaninogenica	3168282	2725	126	0.0462385	95.7771	12.9841	0.0928895
Stool_refseq	28133	Prevotella_nigrescens	2887107	70	10	0.142857	97.3145	27.8	0.0189117
Stool_refseq	28134	Prevotella_oralis	2839537	56	40	0.714286	99.2386	40.975	0.044303
Stool_refseq	28135	Prevotella_oris	3168212	243	7	0.0288066	94.1909	18.2857	0.0142667
Stool_refseq	28136	Prevotella_oulorum	2805893	105	4	0.0380952	95.6408	31.5	0.00923057
Stool_refseq	28137	Prevotella_veroralis	2990547	2299	19	0.00826446	95.4233	16.6842	0.0192273
Stool_refseq	28139	Rikenella_microfusus	2880076	771	599	0.776913	96.8119	31.9366	0.329019
Stool_refseq	28141	Cronobacter_sakazakii	4437993	258	0	0			0
Stool_refseq	28151	Serratia_proteamaculans	5525200	37	0	0			0
Stool_refseq	28152	Yersinia_kristensenii	4733508	9	0	0			0
Stool_refseq	28156	Spirabiliibacterium_mucosae	2151200	2	0	0			0
Stool_refseq	28159	Caviibacterium_pharyngocola	2486286	11	0	0			0
Stool_refseq	28161	Conservatibacter_flavescens	2607477	3	1	0.333333	97.0297	40	0.00391183
Stool_refseq	28169	Vibrio_pelagius	4963975	18	0	0			0
Stool_refseq	28171	Vibrio_aestuarianus	4144461	2	0	0			0
Stool_refseq	28172	Vibrio_metschnikovii	3831334	65	0	0			0
Stool_refseq	28173	Vibrio_nigripulchritudo	6389377	7	0	0			0
Stool_refseq	28174	Vibrio_ordalii	3894846	3	0	0			0
Stool_refseq	28175	Vibrio_orientalis	4698244	1	0	0			0
Stool_refseq	28176	Candidatus_Photodesmus_katoptron	1000156	22	0	0			0
Stool_refseq	28181	Magnetovibrio_blakemorei	3638804	54	0	0			0
Stool_refseq	28182	Leptospira_noguchii	4710917	37	1	0.027027	94.0594	23	0.00216518
Stool_refseq	28183	Leptospira_santarosai	3983611	2	0	0			0
Stool_refseq	28184	Leptospira_weilii	4381393	16	0	0			0
Stool_refseq	28187	Acetohalobium_arabaticum	2469596	22	0	0			0
Stool_refseq	28188	Capnocytophaga_canimorsus	2414275	14	1	0.0714286	96.4286	1	0.00236096
Stool_refseq	28189	Capnocytophaga_cynodegmi	2640475	15	0	0			0
Stool_refseq	28195	Thermonema_lapsum	2693118	4	0	0			0
Stool_refseq	28197	Aliarcobacter_butzleri	2341251	266	0	0			0
Stool_refseq	28198	Aliarcobacter_cryaerophilus	2108340	94	0	0			0
Stool_refseq	28200	Aliarcobacter_skirrowii	1969846	19	0	0			0
Stool_refseq	28210	Chelatococcus_asaccharovorans	7299678	25	0	0			0
Stool_refseq	28213	Sphingomonas_parapaucimobilis	3994522	4	0	0			0
Stool_refseq	28220	Brachymonas_denitrificans	2712870	12	0	0			0
Stool_refseq	28223	Desulfobacula_toluolica	5197905	2	0	0			0
Stool_refseq	28227	Malacoplasma_penetrans	1358633	1	0	0			0
Stool_refseq	28229	Colwellia_psychrerythraea	5373180	104	0	0			0
Stool_refseq	28230	Carnobacterium_alterfunditum	2548842	13	0	0			0
Stool_refseq	28232	Geobacter_metallireducens	4011182	4	0	0			0
Stool_refseq	28234	Geotoga_petraea	2150220	111	0	0			0
Stool_refseq	28251	Ornithobacterium_rhinotracheale	2399175	145	0	0			0
Stool_refseq	28252	Halomonas_halodenitrificans	3464094	10	0	0			0
Stool_refseq	28254	Marinomonas_communis	3854463	2	0	0			0
Stool_refseq	28258	Cobetia_marina	4176400	1	0	0			0
Stool_refseq	28264	Arcanobacterium_haemolyticum	1988850	6	3	0.5	92.9553	6.33333	0.0101566
Stool_refseq	28444	Herbidospora_cretacea	8282092	13	0	0			0
Stool_refseq	28445	Mycobacterium_intermedium	6885661	11	0	0			0
Stool_refseq	28446	Anaerotignum_propionicum	3120417	530	7	0.0132075	93.494	13	0.00467886
Stool_refseq	28447	Clavibacter_michiganensis	3377556	53	12	0.226415	96.2464	29.6667	0.0115468
Stool_refseq	28448	Komagataeibacter_xylinus	3727795	18	0	0			0
Stool_refseq	28449	Neisseria_subflava	2195659	85	18	0.211765	98.8214	40.8889	0.0471385
Stool_refseq	28450	Burkholderia_pseudomallei	7081111	36	0	0			0
Stool_refseq	28454	Sphingobacterium_multivorum	5965850	3	0	0			0
Stool_refseq	28887	Planobispora_longispora	8845392	18	0	0			0
Stool_refseq	28893	Streptomyces_pilosus	7585172	4	0	0			0
Stool_refseq	28894	Streptomyces_nitrosporeus	7581562	1	0	0			0
Stool_refseq	28896	Thermoanaerobacterium_saccharolyticum	2837411	14	0	0			0
Stool_refseq	28898	Campylobacter_helveticus	1871495	4	0	0			0
Stool_refseq	28901	Salmonella_enterica	4951383	18104	35	0.00193327	96.3567	13.1429	0.0578424
Stool_refseq	28903	Mycoplasmopsis_bovis	1003404	22	0	0			0
Stool_refseq	28907	Caedibacter_taeniospiralis	1323505	1	0	0			0
Stool_refseq	29282	Haloarcula_japonica	4279145	9	0	0			0
Stool_refseq	29284	Halorubrum_trapanicum	3080988	1	0	0			0
Stool_refseq	29288	Natronococcus_occultus	4314118	1	0	0			0
Stool_refseq	29299	Nocardioides_plantarum	4681321	40	0	0			0
Stool_refseq	29303	Streptomyces_cattleya	8092553	7	0	0			0
Stool_refseq	29305	Streptomyces_griseoincarnatus	7707382	2	0	0			0
Stool_refseq	29306	Streptomyces_griseoluteus	6664735	2	0	0			0
Stool_refseq	29311	Mycobacterium_haemophilum	4235765	1	0	0			0
Stool_refseq	29314	Mycolicibacter_hiberniae	4396654	2	0	0			0
Stool_refseq	29316	Schaalia_hyovaginalis	2346665	45	0	0			0
Stool_refseq	29320	Paenarthrobacter_nicotinovorans	4481325	4	0	0			0
Stool_refseq	29321	Corynebacterium_otitidis	2118285	34	26	0.764706	99.0946	40.5769	0.0585379
Stool_refseq	29322	#NAME?	3331935	1327	48	0.0361718	93.6809	13.2292	0.0168071
Stool_refseq	29324	Caldicellulosiruptor_naganoensis	2494610	15	0	0			0
Stool_refseq	29329	Thermoanaerobacterium_xylanolyticum	2534358	4	0	0			0
Stool_refseq	29332	Domibacillus_aminovorans	3731130	20	0	0			0
Stool_refseq	29341	Clostridium_argentinense	4803058	112	0	0			0
Stool_refseq	29344	Caloramator_fervidus	1763241	61	0	0			0
Stool_refseq	29345	Sedimentibacter_hydroxybenzoicus	3809287	205	1	0.00487805	91.9355	3	0.00165385
Stool_refseq	29347	#NAME?	3658040	7106	2543	0.357867	97.0894	32.6072	2.46107
Stool_refseq	29348	#NAME?	2528470	5570	4517	0.810952	99.023	37.6712	8.29407
Stool_refseq	29350	Thermoanaerobacter_thermocopriae	2455744	2	0	0			0
Stool_refseq	29354	Lacrimispora_celerecrescens	5272838	1098	7	0.00637523	95.0495	19.4286	0.00834465
Stool_refseq	29355	Ruminiclostridium_cellobioparum	6132222	463	4	0.00863931	93.6988	13.25	0.0053488
Stool_refseq	29357	Clostridium_collagenovorans	3482404	138	4	0.0289855	93.3299	8.25	0.00806914
Stool_refseq	29358	Paeniclostridium_ghonii	3657532	46	7	0.152174	94.4767	14.4286	0.00847566
Stool_refseq	29359	Asaccharospora_irregularis	2622699	181	5	0.0276243	95.0495	18.6	0.0116674
Stool_refseq	29360	Cellulosilyticum_lentocellum	4714237	15	0	0			0
Stool_refseq	29362	Ruminiclostridium_papyrosolvens	5027861	457	0	0			0
Stool_refseq	29363	Clostridium_paraputrificum	3561289	5417	4228	0.780506	99.2413	40.1715	6.87156
Stool_refseq	29364	#NAME?	3458343	1046	22	0.0210325	94.1142	15.5455	0.0163084
Stool_refseq	29365	Hathewaya_proteolytica	2818024	183	3	0.0163934	92.0792	3	0.00723912
Stool_refseq	29367	Clostridium_puniceum	6082167	159	2	0.0125786	94.4444	23	0.00120023
Stool_refseq	29369	Clostridium_sardiniense	3942322	215	2	0.00930233	92.3077	3	0.00167414
Stool_refseq	29370	Lacrimispora_sphenoides	5309474	637	45	0.0706436	92.7286	6.31111	0.00992565
Stool_refseq	29372	Clostridium_thermobutyricum	3505620	218	3	0.0137615	95.1808	17	0.00522019
Stool_refseq	29373	Clostridium_thermopalmarium	2819317	4	0	0			0
Stool_refseq	29376	Desulfofundulus_thermobenzoicus	3716015	28	0	0			0
Stool_refseq	29378	Staphylococcus_arlettae	2706864	3	0	0			0
Stool_refseq	29379	Staphylococcus_auricularis	2216575	23	16	0.695652	98.517	39.25	0.0312645
Stool_refseq	29380	Staphylococcus_caprae	2598513	6	0	0			0
Stool_refseq	29382	Staphylococcus_cohnii	2694244	8	0	0			0
Stool_refseq	29384	Staphylococcus_kloosii	2639038	24	0	0			0
Stool_refseq	29385	Staphylococcus_saprophyticus	2577899	109	0	0			0
Stool_refseq	29388	Staphylococcus_capitis	2497742	31	7	0.225806	97.6692	41.1429	0.0113302
Stool_refseq	29389	Streptococcus_alactolyticus	1832198	31	0	0			0
Stool_refseq	29391	Gemella_morbillorum	1760930	86	65	0.755814	97.0958	32.6615	0.0956313
Stool_refseq	29394	Dolosigranulum_pigrum	1862135	231	22	0.0952381	96.7523	34.3182	0.0430151
Stool_refseq	29405	Microlunatus_phosphovorus	5683123	87	0	0			0
Stool_refseq	29408	Rhodoplanes_elegans	6538588	3	0	0			0
Stool_refseq	29409	Rhodoplanes_roseus	6879536	9	0	0			0
Stool_refseq	29419	Helicobacter_canis	1930063	32	0	0			0
Stool_refseq	29421	Nitrobacter_vulgaris	4293395	2	0	0			0
Stool_refseq	29422	Legionella_brunensis	3750738	5	0	0			0
Stool_refseq	29423	Legionella_oakridgensis	2668211	23	0	0			0
Stool_refseq	29427	Methylorubrum_rhodesianum	5873985	2	0	0			0
Stool_refseq	29428	Methylorubrum_rhodinum	5406054	21	0	0			0
Stool_refseq	29429	Methylorubrum_zatmanii	5389031	4	0	0			0
Stool_refseq	29430	Acinetobacter_haemolyticus	3441166	8	4	0.5	100	42	0.00258633
Stool_refseq	29432	Psychrobacter_phenylpyruvicus	3275513	3	0	0			0
Stool_refseq	29433	Moraxella_ovis	2306095	1	0	0			0
Stool_refseq	29435	Pseudomonas_flavescens	5849540	3	0	0			0
Stool_refseq	29438	Pseudomonas_savastanoi	5999881	7	0	0			0
Stool_refseq	29442	Pseudomonas_tolaasii	6792797	8	0	0			0
Stool_refseq	29443	Paucimonas_lemoignei	4215120	3	0	0			0
Stool_refseq	29446	Xanthomonas_sp.	5069976	2	0	0			0
Stool_refseq	29447	Xanthomonas_albilineans	3756117	7	0	0			0
Stool_refseq	29448	Bradyrhizobium_elkanii	9518205	14	0	0			0
Stool_refseq	29449	Rhizobium_etli	6530228	10	0	0			0
Stool_refseq	29450	Rhizobium_leucaenae	6679728	5	0	0			0
Stool_refseq	29459	Brucella_melitensis	3294931	3	0	0			0
Stool_refseq	29461	Brucella_suis	3315175	2	0	0			0
Stool_refseq	29466	Veillonella_parvula	2132142	170622	26702	0.156498	96.884	31.8183	41.7849
Stool_refseq	29471	Pectobacterium_atrosepticum	5024250	4	0	0			0
Stool_refseq	29483	Yersinia_aldovae	4471090	5	0	0			0
Stool_refseq	29484	Yersinia_frederiksenii	4941872	6	0	0			0
Stool_refseq	29485	Yersinia_rohdei	4372253	14	0	0			0
Stool_refseq	29486	Yersinia_ruckeri	3894226	39	2	0.0512821	100	42	0.00154074
Stool_refseq	29488	Photorhabdus_luminescens	5464970	6	0	0			0
Stool_refseq	29489	Aeromonas_enteropelogenes	4392400	5	0	0			0
Stool_refseq	29494	Vibrio_furnissii	4993326	35	0	0			0
Stool_refseq	29495	Vibrio_navarrensis	4439391	20	0	0			0
Stool_refseq	29497	Vibrio_splendidus	5449819	37	0	0			0
Stool_refseq	29498	Vibrio_tubiashii	5540337	8	0	0			0
Stool_refseq	29503	Desulfomicrobium_escambiense	3782107	38	2	0.0526316	91.4634	3	0.00219454
Stool_refseq	29506	Leptospira_inadai	4457871	39	0	0			0
Stool_refseq	29507	Leptospira_kirschneri	4409424	7	0	0			0
Stool_refseq	29508	Leptospira_meyeri	4237206	36	0	0			0
Stool_refseq	29510	Turneriella_parva	4409302	15	0	0			0
Stool_refseq	29511	Leptospira_wolbachii	4081981	1	0	0			0
Stool_refseq	29519	Borreliella_garinii	905692	10	0	0			0
Stool_refseq	29522	Brachyspira_aalborgi	2609344	95	0	0			0
Stool_refseq	29524	Porphyromonas_circumdentaria	2033794	39	0	0			0
Stool_refseq	29528	Flammeovirga_aprica	9310590	10	0	0			0
Stool_refseq	29529	Chitinophaga_arvensicola	8316369	37	0	0			0
Stool_refseq	29530	Cytophaga_aurantiaca	4425125	49	0	0			0
Stool_refseq	29533	Flavobacterium_pectinovorum	5610979	40	0	0			0
Stool_refseq	29534	Flavobacterium_saccharophilum	5209309	9	0	0			0
Stool_refseq	29536	Flavobacterium_succinicans	3664904	7	0	0			0
Stool_refseq	29539	Thermoleophilum_album	2207191	10	0	0			0
Stool_refseq	29542	Syntrophotalea_acetylenica	3176363	25	0	0			0
Stool_refseq	29543	Pelobacter_propionicus	4241119	11	0	0			0
Stool_refseq	29545	Azoarcus_indigens	5464470	13	0	0			0
Stool_refseq	29549	Rhodothermus_marinus	3386737	43	0	0			0
Stool_refseq	29552	Haploplasma_axanthum	1883099	18	0	0			0
Stool_refseq	29553	Mycoplasmopsis_bovirhinis	922012	970	0	0			0
Stool_refseq	29554	Metamycoplasma_canadense	693241	3	0	0			0
Stool_refseq	29555	Mycoplasmopsis_canis	897443	26	0	0			0
Stool_refseq	29556	Mycoplasmopsis_gallinacea	1074838	2	0	0			0
Stool_refseq	29557	Mycoplasmopsis_gallinarum	834674	40	0	0			0
Stool_refseq	29559	Metamycoplasma_hyosynoviae	889181	4	0	0			0
Stool_refseq	29560	Mycoplasma_imitans	922439	18	0	0			0
Stool_refseq	29561	Mycoplasmopsis_meleagridis	644173	26	0	0			0
Stool_refseq	29562	Mesomycoplasma_ovipneumoniae	1081520	192	0	0			0
Stool_refseq	29563	Halanaerobium_salsuginis	2991186	36	0	0			0
Stool_refseq	29571	Halomonas_subglaciescola	3110197	2	0	0			0
Stool_refseq	29573	Halomonas_halophila	3563217	4	0	0			0
Stool_refseq	29575	Taylorella_equigenitalis	1704267	7	0	0			0
Stool_refseq	29581	Janthinobacterium_lividum	6373589	25	0	0			0
Stool_refseq	31899	Caldicellulosiruptor_bescii	2931662	44	0	0			0
Stool_refseq	31909	Halothermothrix_orenii	2578146	14	0	0			0
Stool_refseq	31910	Halovibrio_variabilis	3729154	2	0	0			0
Stool_refseq	31943	Brevibacterium_iodinum	3614741	4	0	0			0
Stool_refseq	31958	Amycolatopsis_orientalis	9490992	45	0	0			0
Stool_refseq	31962	Actinomadura_rifamycini	8385432	4	0	0			0
Stool_refseq	31971	Amedibacillus_dolichus	2191053	445	91	0.204494	96.8302	23.9341	0.165856
Stool_refseq	31973	Eggerthia_catenaformis	1945158	228	15	0.0657895	94.7472	20.6	0.0367065
Stool_refseq	31998	Methylobacterium_radiotolerans	6899110	1	0	0			0
Stool_refseq	32002	Achromobacter_denitrificans	6736870	13	0	0			0
Stool_refseq	32013	Comamonas_terrigena	4673011	2	0	0			0
Stool_refseq	32025	Helicobacter_hepaticus	1799146	1	0	0			0
Stool_refseq	32040	Acidovorax_konjaci	5077528	7	0	0			0
Stool_refseq	32046	Synechococcus_elongatus	2749599	11	0	0			0
Stool_refseq	32052	Synechococcus_sp._WH_8020	2661166	2	0	0			0
Stool_refseq	32053	Thermostichus_vulcanus	3717564	5	0	0			0
Stool_refseq	32056	Dulcicalothrix_desertica	11416284	14	0	0			0
Stool_refseq	32062	Deinococcus_radiophilus	2827165	2	0	0			0
Stool_refseq	33007	Winkia_neuii	2270293	3	0	0			0
Stool_refseq	33010	Cutibacterium_avidum	2526138	32	7	0.21875	99.0099	39.2857	0.01243
Stool_refseq	33011	Cutibacterium_granulosum	2179712	315	276	0.87619	98.2967	38.2645	0.602052
Stool_refseq	33012	Propionimicrobium_lymphophilum	2035623	2	0	0			0
Stool_refseq	33018	Sporolactobacillus_laevolacticus	3590176	7	0	0			0
Stool_refseq	33025	Phascolarctobacterium_faecium	2454371	581261	511402	0.879815	99.245	40.7934	86.8584
Stool_refseq	33028	Staphylococcus_saccharolyticus	2346516	58	8	0.137931	100	42	0.0156402
Stool_refseq	33029	Anaerococcus_hydrogenalis	1908330	14	0	0			0
Stool_refseq	33030	Peptoniphilus_indolicus	2247968	24	0	0			0
Stool_refseq	33031	Peptoniphilus_lacrimalis	1883562	34	5	0.147059	99.0079	42	0.01752
Stool_refseq	33032	Anaerococcus_lactolyticus	1936866	66	3	0.0454545	92.2634	4.66667	0.00975803
Stool_refseq	33033	Parvimonas_micra	1677398	184	114	0.619565	99.1207	37.1491	0.388757
Stool_refseq	33034	Anaerococcus_prevotii	1998633	116	2	0.0172414	94.7368	23	0.00385263
Stool_refseq	33035	Blautia_producta	6197116	2571	200	0.0777907	96.584	26.49	0.132546
Stool_refseq	33036	Anaerococcus_tetradius	1725895	99	0	0			0
Stool_refseq	33037	Anaerococcus_vaginalis	1893964	26	2	0.0769231	97.0297	40	0.00549113
Stool_refseq	33038	#NAME?	3549191	142926	99880	0.698823	99.2286	40.2233	62.5303
Stool_refseq	33039	#NAME?	2979783	43828	28523	0.650794	99.6428	40.6886	36.0097
Stool_refseq	33040	Streptococcus_milleri	1943143	12	0	0			0
Stool_refseq	33043	Coprococcus_eutactus	3112919	17234	2683	0.155681	96.4413	29.6057	2.52734
Stool_refseq	33045	Bartonella_grahamii	2369520	2	0	0			0
Stool_refseq	33046	Bartonella_taylorii	1948309	9	0	0			0
Stool_refseq	33047	Bartonella_vinsonii	1995085	17	0	0			0
Stool_refseq	33049	Phaeovulum_veldkampii	3268293	15	0	0			0
Stool_refseq	33050	Sphingopyxis_macrogoltabida	5748623	8	0	0			0
Stool_refseq	33051	Sphingomonas_sanguinis	4053092	11	0	0			0
Stool_refseq	33052	Sphingopyxis_terrae	3570894	1	0	0			0
Stool_refseq	33053	Neisseria_perflava	2266113	34	4	0.117647	95.8409	28	0.00741358
Stool_refseq	33056	Candidatus_Kinetoplastibacterium_crithidii	821930	4	0	0			0
Stool_refseq	33059	Acidithiobacillus_caldus	3237599	15	0	0			0
Stool_refseq	33060	Yersinia_mollaretii	4603534	5	0	0			0
Stool_refseq	33069	Pseudomonas_viridiflava	6093513	93	0	0			0
Stool_refseq	33070	Thermostichus_lividus	2659739	20	0	0			0
Stool_refseq	33072	Gloeobacter_violaceus	4659019	4	0	0			0
Stool_refseq	33074	Zymobacter_palmae	3028543	8	0	0			0
Stool_refseq	33075	Acidobacterium_capsulatum	4127356	21	0	0			0
Stool_refseq	33865	Methanoplanus_endosymbiosus	3163021	10	0	0			0
Stool_refseq	33871	Coriobacterium_glomerans	2115681	85	0	0			0
Stool_refseq	33876	Catenuloplanes_japonicus	10971538	16	0	0			0
Stool_refseq	33878	Agromyces_cerinus	4187509	4	0	0			0
Stool_refseq	33879	Agromyces_ramosus	3838279	2	0	0			0
Stool_refseq	33881	Curtobacterium_luteum	3620063	11	0	0			0
Stool_refseq	33883	Microbacterium_arborescens	3370341	1	0	0			0
Stool_refseq	33884	Microbacterium_imperiale	3082772	12	0	0			0
Stool_refseq	33887	Rathayibacter_rathayi	3103889	7	0	0			0
Stool_refseq	33888	Rathayibacter_tritici	3354681	1	0	0			0
Stool_refseq	33895	Mycobacterium_interjectum	5929237	9	0	0			0
Stool_refseq	33897	Streptomyces_bluensis	9022007	5	0	0			0
Stool_refseq	33898	Streptomyces_galbus	7836436	25	12	0.48	98.3473	38.75	0.00401968
Stool_refseq	33899	Streptomyces_galilaeus	9317583	3	0	0			0
Stool_refseq	33900	Streptomyces_murinus	8349858	11	0	0			0
Stool_refseq	33904	Streptomyces_mashuensis	7237780	5	0	0			0
Stool_refseq	33905	Bifidobacterium_thermophilum	2316133	15	0	0			0
Stool_refseq	33906	Actinopolyspora_mortivallis	4233350	14	0	0			0
Stool_refseq	33907	Pseudonocardia_alni	6242493	6	0	0			0
Stool_refseq	33910	Amycolatopsis_mediterranei	10236779	10	0	0			0
Stool_refseq	33914	Saccharopolyspora_gregorii	6344421	9	0	0			0
Stool_refseq	33919	Saccharothrix_coeruleofusca	7778610	15	0	0			0
Stool_refseq	33923	Mycoplasmopsis_felis	958349	4	0	0			0
Stool_refseq	33932	Sutcliffiella_cohnii	4899141	13	0	0			0
Stool_refseq	33934	Anoxybacillus_flavithermus	2846746	25	0	0			0
Stool_refseq	33935	Lysinibacillus_macroides	4862621	6	0	0			0
Stool_refseq	33936	Aeribacillus_pallidus	3903800	6	1	0.166667	96.1538	24	0.00135765
Stool_refseq	33940	Geobacillus_thermodenitrificans	3505276	3	0	0			0
Stool_refseq	33943	Kyrpidia_tusciae	3384766	6	0	0			0
Stool_refseq	33945	Enterococcus_avium	4537641	61	0	0			0
Stool_refseq	33946	Kurthia_gibsonii	2778614	3	2	0.666667	97.0297	32.5	0.00478656
Stool_refseq	33952	Acetobacterium_woodii	4044777	60	0	0			0
Stool_refseq	33953	Clostridium_aminobutyricum	3219148	335	6	0.0179104	91.618	3.83333	0.00192598
Stool_refseq	33954	Clostridium_magnum	6472246	65	0	0			0
Stool_refseq	33959	Lactobacillus_johnsonii	1951416	191	37	0.193717	95.0551	21.8649	0.10372
Stool_refseq	33960	Secundilactobacillus_collinoides	3616190	6	1	0.166667	97.5	11	0.00223993
Stool_refseq	33962	Lentilactobacillus_kefiri	2489034	96	0	0			0
Stool_refseq	33964	Leuconostoc_citreum	1903250	9	0	0			0
Stool_refseq	33968	Leuconostoc_pseudomesenteroides	2114657	8	0	0			0
Stool_refseq	33970	Melissococcus_plutonius	2067831	1	0	0			0
Stool_refseq	33977	Caryophanon_latum	3590595	4	0	0			0
Stool_refseq	33978	Caryophanon_tenue	3340962	1	0	0			0
Stool_refseq	33984	Luteococcus_japonicus	3452849	5	0	0			0
Stool_refseq	33987	Exiguobacterium_aurantiacum	3037601	34	0	0			0
Stool_refseq	33989	Rickettsia_amblyommatis	1456213	1	0	0			0
Stool_refseq	33994	Neorickettsia_helminthoeca	884232	2	0	0			0
Stool_refseq	33995	Komagataeibacter_europaeus	3797909	10	0	0			0
Stool_refseq	33996	Gluconacetobacter_diazotrophicus	3914947	12	0	0			0
Stool_refseq	33998	Acidocella_aminolytica	3964820	5	0	0			0
Stool_refseq	34002	Paracoccus_alcaliphilus	4772712	3	0	0			0
Stool_refseq	34004	Paracoccus_aminovorans	4038130	15	0	0			0
Stool_refseq	34006	Paracoccus_thiocyanatus	3524418	6	0	0			0
Stool_refseq	34007	Paracoccus_versutus	4969440	8	0	0			0
Stool_refseq	34010	Azospirillum_halopraeferens	6512377	8	0	0			0
Stool_refseq	34011	Niveispirillum_irakense	5455784	14	0	0			0
Stool_refseq	34015	Blastomonas_natatoria	4045865	3	0	0			0
Stool_refseq	34017	Rhodobium_orientis	5189386	18	0	0			0
Stool_refseq	34018	Rhodospirillum_centenum	4355543	13	0	0			0
Stool_refseq	34020	Candidatus_Liberibacter_africanus	1192232	2	0	0			0
Stool_refseq	34021	Candidatus_Liberibacter_asiaticus	1230251	4	0	0			0
Stool_refseq	34022	Candidatus_Liberibacter_sp.	1408989	2	1	0.5	97.0297	40	0.00723923
Stool_refseq	34027	Aromatoleum_tolulyticum	5110391	9	0	0			0
Stool_refseq	34029	Leptothrix_cholodnii	4909403	2	0	0			0
Stool_refseq	34031	Desulfobacter_vibrioformis	4466775	9	0	0			0
Stool_refseq	34032	Desulfobulbus_rhabdoformis	5266585	9	0	0			0
Stool_refseq	34038	Rahnella_aquatilis	5448900	7	0	0			0
Stool_refseq	34059	Moraxella_atlantae	2501639	3	0	0			0
Stool_refseq	34060	Moraxella_caviae	2736043	1	0	0			0
Stool_refseq	34061	Moraxella_cuniculi	2202865	15	0	0			0
Stool_refseq	34062	Moraxella_osloensis	2649137	107	43	0.401869	96.1396	28.7907	0.0866697
Stool_refseq	34068	Cycloclasticus_pugetii	2383924	1	0	0			0
Stool_refseq	34071	Telluria_mixta	7444617	102	0	0			0
Stool_refseq	34073	Variovorax_paradoxus	7079721	69	0	0			0
Stool_refseq	34078	Scytonema_hofmannii	12294410	10	0	0			0
Stool_refseq	34085	Riemerella_anatipestifer	2155121	104	0	0			0
Stool_refseq	34086	Pedobacter_antarcticus	4422181	9	0	0			0
Stool_refseq	34087	Sphingobacterium_faecium	5296794	4	0	0			0
Stool_refseq	34090	Pelodictyon_phaeoclathratiforme	3018238	39	0	0			0
Stool_refseq	34095	Borreliella_japonica	1017684	1	0	0			0
Stool_refseq	34097	Brevinema_andersonii	1501400	4	0	0			0
Stool_refseq	34101	Sporosarcina_limicola	4301636	35	0	0			0
Stool_refseq	34103	Sphaerotilus_natans	4630083	21	0	0			0
Stool_refseq	34105	Streptobacillus_moniliformis	1673280	78	1	0.0128205	92.0792	3	0.00609581
Stool_refseq	35519	Mogibacterium_timidum	1806210	20	5	0.25	95.4764	23.6	0.0139519
Stool_refseq	35554	Geobacter_sulfurreducens	3814128	41	0	0			0
Stool_refseq	35619	Streptomyces_griseoflavus	7580440	6	0	0			0
Stool_refseq	35620	Streptomyces_hirsutus	8843894	3	0	0			0
Stool_refseq	35621	Streptomyces_mobaraensis	7668063	3	0	0			0
Stool_refseq	35622	Thermostaphylospora_chromogena	5988017	15	0	0			0
Stool_refseq	35623	Acholeplasma_oculi	1600576	3	0	0			0
Stool_refseq	35700	Heliophilum_fasciatum	3142229	10	0	0			0
Stool_refseq	35701	Heliomicrobium_modesticaldum	3075407	53	0	0			0
Stool_refseq	35703	Citrobacter_amalonaticus	5071999	86	1	0.0116279	92.0792	3	0.00201104
Stool_refseq	35743	Halorubrum_sodomense	3030553	4	0	0			0
Stool_refseq	35751	Sporichthya_polymorpha	5500153	12	0	0			0
Stool_refseq	35752	Actinoplanes_philippinensis	10381230	19	0	0			0
Stool_refseq	35754	Dactylosporangium_aurantiacum	11523879	21	0	0			0
Stool_refseq	35755	Corynebacterium_kutscheri	2354065	5	0	0			0
Stool_refseq	35756	Corynebacterium_pilosum	2593653	1	1	1	92.0792	3	0.00393268
Stool_refseq	35757	Corynebacterium_cystitidis	3011567	19	0	0			0
Stool_refseq	35760	Bifidobacterium_choerinum	2257294	10	0	0			0
Stool_refseq	35761	Nocardioides_sp.	4665855	5	0	0			0
Stool_refseq	35762	Planobispora_rosea	8559326	13	0	0			0
Stool_refseq	35763	Acrocarpospora_corrugata	9271625	5	0	0			0
Stool_refseq	35765	Streptosporangium_pseudovulgare	8586701	7	0	0			0
Stool_refseq	35768	Mycoplasmopsis_felifaucium	764934	1	0	0			0
Stool_refseq	35773	Candidatus_Phytoplasma_luffae	769143	1	0	0			0
Stool_refseq	35786	Coprothermobacter_proteolyticus	1424912	16	0	0			0
Stool_refseq	35787	Limosilactobacillus_pontis	1714771	71	0	0			0
Stool_refseq	35791	Rickettsia_massiliae	1376184	1	0	0			0
Stool_refseq	35797	Nitrococcus_mobilis	3623681	2	0	0			0
Stool_refseq	35799	Nitrosospira_briensis	3210113	4	0	0			0
Stool_refseq	35801	Nitrospina_gracilis	3077713	20	0	0			0
Stool_refseq	35804	Rhodovulum_adriaticum	3350627	3	0	0			0
Stool_refseq	35805	Rhodovulum_euryhalinum	3789126	2	0	0			0
Stool_refseq	35806	Rhodovulum_sulfidophilum	4347929	10	0	0			0
Stool_refseq	35811	Erythrobacter_ramosus	3342622	7	0	0			0
Stool_refseq	35813	Roseococcus_thiosulfatophilus	4091248	12	0	0			0
Stool_refseq	35814	Bordetella_holmesii	3688120	3	0	0			0
Stool_refseq	35817	Helicobacter_heilmannii	1638988	52	0	0			0
Stool_refseq	35818	Helicobacter_pullorum	1733410	20	0	0			0
Stool_refseq	35825	Pseudobacteroides_cellulosolvens	6878816	261	0	0			0
Stool_refseq	35830	Acetivibrio_cellulolyticus	6156735	266	0	0			0
Stool_refseq	35833	Bilophila_wadsworthia	4391194	113127	98544	0.871092	98.9402	39.7706	61.4574
Stool_refseq	35835	Hydrogenobacter_hydrogenophilus	1601489	1	0	0			0
Stool_refseq	35837	Desulfacinum_infernum	4239823	21	0	0			0
Stool_refseq	35839	Holophaga_foetida	4127237	15	1	0.0666667	92.0792	3	0.00247139
Stool_refseq	35841	Caldibacillus_thermoamylovorans	3707071	1	0	0			0
Stool_refseq	36738	Halococcus_salifodinae	4199784	4	0	0			0
Stool_refseq	36740	Dermabacter_hominis	2155270	7	5	0.714286	97.9547	34.8	0.013177
Stool_refseq	36742	Mycoplasma_leonicaptivi	901123	5	0	0			0
Stool_refseq	36744	Mycoplasma_simbae	852572	25	0	0			0
Stool_refseq	36745	Clostridium_saccharoperbutylacetonicum	6666445	37	0	0			0
Stool_refseq	36746	Pseudomonas_cichorii	5984143	9	0	0			0
Stool_refseq	36805	Microbacterium_aurum	3424892	13	2	0.153846	98.9432	42	0.00347456
Stool_refseq	36807	Microbacterium_laevaniformans	3031132	2	0	0			0
Stool_refseq	36808	Corynebacterium_bovis	2666089	12	0	0			0
Stool_refseq	36809	Mycobacteroides_abscessus	5090491	33	0	0			0
Stool_refseq	36811	Mycolicibacterium_agri	7297392	15	0	0			0
Stool_refseq	36814	Mycolicibacterium_rhodesiae	6009003	5	0	0			0
Stool_refseq	36816	Streptomyces_caelestis	8936092	3	0	0			0
Stool_refseq	36817	Streptomyces_pseudogriseolus	7363847	2	0	0			0
Stool_refseq	36818	Streptomyces_subrutilus	7604974	11	0	0			0
Stool_refseq	36819	Amycolatopsis_azurea	9217912	8	0	0			0
Stool_refseq	36820	Gordonia_aichiensis	5092029	6	4	0.666667	100	42	0.00200313
Stool_refseq	36821	Gordonia_amarae	5289363	7	0	0			0
Stool_refseq	36822	Gordonia_rubripertincta	5263177	4	0	0			0
Stool_refseq	36823	Gordonia_sputi	4952979	4	0	0			0
Stool_refseq	36832	Lacrimispora_aerotolerans	4732373	1319	22	0.0166793	93.1406	9.95455	0.0101218
Stool_refseq	36834	Clostridium_celatum	3639821	427	139	0.325527	96.6074	28.7122	0.215972
Stool_refseq	36835	#NAME?	2035557	158	9	0.056962	97.5798	1	0.0203875
Stool_refseq	36839	Clostridium_felsineum	5242194	14	0	0			0
Stool_refseq	36841	Terrisporobacter_glycolicus	4060596	83	13	0.156627	94.9938	23.3077	0.0196523
Stool_refseq	36842	Maledivibacter_halophilus	5802910	73	0	0			0
Stool_refseq	36844	Clostridium_homopropionicum	3644832	79	0	0			0
Stool_refseq	36845	Clostridium_intestinale	4686421	120	1	0.00833333	96.0396	24	0.0021765
Stool_refseq	36847	Anaerotignum_neopropionicum	3194881	246	18	0.0731707	95.9459	29.4444	0.0164638
Stool_refseq	36849	Oxobacter_pfennigii	4510552	209	3	0.0143541	92.7701	4.66667	0.00239439
Stool_refseq	36854	Desulfitobacterium_dehalogenans	4321753	3	0	0			0
Stool_refseq	36856	Sinorhizobium_saheli	5994348	1	0	0			0
Stool_refseq	36861	Thiobacillus_denitrificans	3609948	25	0	0			0
Stool_refseq	36863	Ideonella_dechloratans	4544016	1	0	0			0
Stool_refseq	36873	Paraburkholderia_xenovorans	9731138	9	0	0			0
Stool_refseq	36874	Porphyromonas_cangingivalis	2404857	19	0	0			0
Stool_refseq	36875	Porphyromonas_canoris	2308674	38	32	0.842105	95.1358	20.875	0.0108287
Stool_refseq	37326	Nocardia_brasiliensis	8935513	62	0	0			0
Stool_refseq	37327	Nocardia_brevicatena	7007170	11	0	0			0
Stool_refseq	37328	Nocardia_carnea	7492940	11	0	0			0
Stool_refseq	37329	Nocardia_farcinica	6292344	8	0	0			0
Stool_refseq	37330	Nocardia_nova	7959976	5	0	0			0
Stool_refseq	37331	Pseudonocardia_petroleophila	6490139	20	0	0			0
Stool_refseq	37332	Nocardia_seriolae	8134318	9	0	0			0
Stool_refseq	37333	Nocardia_transvalensis	8398323	13	0	0			0
Stool_refseq	37372	Helicobacter_bilis	2559659	32	0	0			0
Stool_refseq	37448	Polaromonas_vacuolata	3837686	2	0	0			0
Stool_refseq	37482	Laceyella_sacchari	3383707	10	0	0			0
Stool_refseq	37487	Marichromatium_purpuratum	3779112	9	0	0			0
Stool_refseq	37625	Desulfuromusa_kysingii	3744894	116	0	0			0
Stool_refseq	37633	Kineococcus_aurantiacus	5027298	10	0	0			0
Stool_refseq	37636	Thermus_scotoductus	2070699	7	0	0			0
Stool_refseq	37637	Corynebacterium_pseudodiphtheriticum	2261008	18	4	0.222222	95.2822	24	0.00919944
Stool_refseq	37658	#NAME?	4222819	348	3	0.00862069	94.96	23.3333	0.0038363
Stool_refseq	37659	Clostridium_algidicarnis	3060291	137	0	0			0
Stool_refseq	37692	Candidatus_Phytoplasma_mali	601943	3	0	0			0
Stool_refseq	37734	Enterococcus_casseliflavus	3427276	83	0	0			0
Stool_refseq	37752	Flavobacterium_hibernum	5283672	6	0	0			0
Stool_refseq	37915	Dietzia_maris	4037770	4	0	0			0
Stool_refseq	37916	Mycolicibacterium_chlorophenolicum	7330216	3	0	0			0
Stool_refseq	37919	Rhodococcus_opacus	9166298	17	0	0			0
Stool_refseq	37921	Arthrobacter_agilis	3786308	5	0	0			0
Stool_refseq	37923	Rothia_kristinae	2377741	3	0	0			0
Stool_refseq	37925	Thermocrispum_agreste	4196086	6	0	0			0
Stool_refseq	37926	Thermocrispum_municipale	4526423	20	0	0			0
Stool_refseq	37927	Sinomonas_atrocyanea	4492204	6	0	0			0
Stool_refseq	37928	Arthrobacter_crystallopoietes	5032705	10	0	0			0
Stool_refseq	37930	Glutamicibacter_protophormiae	3933924	11	0	0			0
Stool_refseq	37931	Paenarthrobacter_ureafaciens	4724281	6	0	0			0
Stool_refseq	38023	Methanolobus_bombayensis	3122090	37	0	0			0
Stool_refseq	38026	Methanolobus_vulcani	2947907	100	0	0			0
Stool_refseq	38027	Methanosarcina_siciliae	5017558	18	0	0			0
Stool_refseq	38284	Corynebacterium_accolens	2465625	51	15	0.294118	97.8878	38.0667	0.0489531
Stool_refseq	38286	Corynebacterium_afermentans	2353801	62	29	0.467742	95.665	27.1034	0.0703543
Stool_refseq	38288	Corynebacterium_genitalium	2337040	35	9	0.257143	99.0559	42	0.0172868
Stool_refseq	38289	Corynebacterium_jeikeium	2524840	25	0	0			0
Stool_refseq	38290	Corynebacterium_macginleyi	2493537	15	10	0.666667	98.2945	41.6	0.0133545
Stool_refseq	38293	Photobacterium_damselae	4498533	37	3	0.0810811	97.0708	1	0.00522393
Stool_refseq	38300	Streptomyces_pristinaespiralis	8112061	7	0	0			0
Stool_refseq	38301	Corynebacterium_minutissimum	2695970	80	24	0.3	97.6542	35.0417	0.0492216
Stool_refseq	38303	Corynebacterium_pseudogenitalium	2389603	31	1	0.0322581	97.0297	40	0.00426849
Stool_refseq	38304	Corynebacterium_tuberculostearicum	2451854	221	161	0.728507	96.5158	30.2174	0.343781
Stool_refseq	38305	Corynebacterium_vitaeruminis	2931780	8	0	0			0
Stool_refseq	38307	Gluconobacter_cerinus	3467487	11	0	0			0
Stool_refseq	38308	Gluconobacter_frateurii	3309380	11	0	0			0
Stool_refseq	38311	Rhodococcus_marinonascens	4924407	1	0	0			0
Stool_refseq	38312	Rhodococcus_rhodnii	4491802	4	0	0			0
Stool_refseq	38313	Shewanella_algae	4924764	17	0	0			0
Stool_refseq	38402	Erysipelothrix_tonsillarum	1931022	3	0	0			0
Stool_refseq	38502	Blastococcus_aggregatus	4620309	10	0	0			0
Stool_refseq	38815	Desulfuromonas_acetexigens	3683125	26	0	0			0
Stool_refseq	38875	Heyndrickxia_oleronia	5371064	5	0	0			0
Stool_refseq	38986	Alteracholeplasma_palmae	1554229	250	1	0.004	97.0297	1	0.00656274
Stool_refseq	39029	Megasphaera_cerevisiae	3152696	127	3	0.023622	93.2477	11.3333	0.00884957
Stool_refseq	39047	Mycoplasmopsis_sturni	813344	1	0	0			0
Stool_refseq	39060	Desulfoscipio_geothermicus	3652244	32	0	0			0
Stool_refseq	39122	Skermania_piniformis	4230116	21	0	0			0
Stool_refseq	39152	Methanococcus_maripaludis	1714918	25	0	0			0
Stool_refseq	39441	Methanobrevibacter_arboriphilus	2445031	1	0	0			0
Stool_refseq	39480	Andreesenia_angusta	2343503	32	0	0			0
Stool_refseq	39482	Faecalicatena_contorta	5055003	8042	265	0.032952	95.5176	24.634	0.183066
Stool_refseq	39483	Faecalitalea_cylindroides	1882013	726	3	0.00413223	95.3663	24	0.0128054
Stool_refseq	39484	Agathobaculum_desmolans	2646896	3225	2118	0.656744	98.2924	37.0331	2.07405
Stool_refseq	39485	Lachnospira_eligens	2831389	259565	152524	0.587614	97.8305	36.0532	67.3434
Stool_refseq	39486	Dorea_formicigenerans	3188304	25617	8435	0.329274	97.7836	35.9412	10.9207
Stool_refseq	39487	Atopobium_fossor	1657369	19	0	0			0
Stool_refseq	39488	Anaerobutyricum_hallii	3455681	101807	82381	0.809188	99.2753	39.5741	63.9794
Stool_refseq	39489	Clostridium_moniliforme	2605467	95	4	0.0421053	93.0187	9.25	0.0044138
Stool_refseq	39490	Eubacterium_ramulus	3378009	30928	22242	0.719154	98.865	39.1615	27.0253
Stool_refseq	39493	Clostridium_tarantellae	3979886	85	2	0.0235294	95.0495	23.5	0.00263827
Stool_refseq	39495	Eubacterium_uniforme	2872342	1107	186	0.168022	96.2912	29.4194	0.129058
Stool_refseq	39496	Eubacterium_ventriosum	2761423	136690	101962	0.745936	98.8073	39.9277	66.8955
Stool_refseq	39497	Eubacterium_xylanophilum	2579248	1216	125	0.102796	93.7598	13.856	0.0635844
Stool_refseq	39650	Cellvibrio_mixtus	4773886	27	0	0			0
Stool_refseq	39669	Methanosalsum_zhilinae	2138444	2	0	0			0
Stool_refseq	39687	Mycolicibacterium_austroafricanum	6287627	10	0	0			0
Stool_refseq	39688	Mycolicibacterium_duvalii	5657388	7	0	0			0
Stool_refseq	39691	Mycolicibacterium_moriokaense	6225779	8	0	0			0
Stool_refseq	39692	Mycolicibacterium_parafortuitum	6044196	19	0	0			0
Stool_refseq	39694	Mycolicibacterium_poriferae	5929171	3	0	0			0
Stool_refseq	39765	Hydrogenovibrio_crunogenus	2453259	20	0	0			0
Stool_refseq	39766	Sulfurimonas_denitrificans	2201561	54	1	0.0185185	90.7407	3	0.00249823
Stool_refseq	39774	Methylomicrobium_agile	4526071	3	0	0			0
Stool_refseq	39777	Veillonella_atypica	2071607	45913	27205	0.592534	96.3943	30.758	38.5714
Stool_refseq	39778	Veillonella_dispar	2116915	53260	25708	0.482689	96.5223	29.9165	22.6632
Stool_refseq	39791	Corynebacterium_glucuronolyticum	2866769	32	22	0.6875	98.9759	41.8182	0.0324756
Stool_refseq	39841	Thermodesulforhabdus_norvegica	2808342	3	1	0.333333	92.0792	3	0.00363204
Stool_refseq	39844	Mesorhizobium_tianshanense	7864668	8	0	0			0
Stool_refseq	39950	Dialister_pneumosintes	1247407	180	9	0.05	99.4828	32.8889	0.0408046
Stool_refseq	39956	Methylobacterium_mesophilicum	5902708	15	0	0			0
Stool_refseq	39960	Erythrobacter_litoralis	3251353	7	0	0			0
Stool_refseq	40091	Helcococcus_kunzii	2096464	21	0	0			0
Stool_refseq	40137	Afipia_carboxidovorans	3896074	10	0	0			0
Stool_refseq	40214	Acinetobacter_johnsonii	3540498	34	0	0			0
Stool_refseq	40215	Acinetobacter_junii	3438557	16	6	0.375	98.1818	42	0.00162859
Stool_refseq	40216	Acinetobacter_radioresistens	3089777	4	0	0			0
Stool_refseq	40269	Aliivibrio_salmonicida	4655660	4	0	0			0
Stool_refseq	40318	Streptomyces_nodosus	7772587	9	0	0			0
Stool_refseq	40324	Stenotrophomonas_maltophilia	5004261	205	0	0			0
Stool_refseq	40335	Legionella_tucsonensis	3357159	1	0	0			0
Stool_refseq	40414	Desulforhopalus_vacuolatus	3830687	32	2	0.0625	95.4545	24	0.00174903
Stool_refseq	40516	Gordonia_hydrophobica	4632341	5	0	0			0
Stool_refseq	40518	Ruminococcus_bromii	1849782	47277	13349	0.282357	96.7815	32.4979	24.4286
Stool_refseq	40519	Ruminococcus_callidus	3165429	130893	20093	0.153507	97.0357	24.6776	14.0223
Stool_refseq	40520	Blautia_obeum	3649956	91571	41784	0.456302	98.5072	38.1654	35.9593
Stool_refseq	40542	Leptotrichia_buccalis	2465610	17	0	0			0
Stool_refseq	40543	Sneathia_sanguinegens	1259487	167	122	0.730539	98.7718	39.0164	0.466777
Stool_refseq	40545	Sutterella_wadsworthensis	3026517	683541	610318	0.892877	98.625	37.9909	93.8338
Stool_refseq	40571	Lentzea_albidocapillata	8639486	10	0	0			0
Stool_refseq	40575	Clostridium_grantii	4474501	32	0	0			0
Stool_refseq	40576	Xenorhabdus_bovienii	4674198	17	0	0			0
Stool_refseq	40577	Xenorhabdus_poinarii	3659523	3	0	0			0
Stool_refseq	40578	Xenorhabdus_beddingii	4096854	1	0	0			0
Stool_refseq	40681	Sphingomonas_asaccharolytica	4608803	3	0	0			0
Stool_refseq	40682	Sphingomonas_mali	5228377	4	0	0			0
Stool_refseq	40835	Borrelia_hispanica	1783846	1	0	0			0
Stool_refseq	40841	Succiniclasticum_ruminis	2539887	206	0	0			0
Stool_refseq	40983	Geobacter_hydrogenophilus	4043428	5	0	0			0
Stool_refseq	40988	Saccharomonospora_azurea	4763852	7	0	0			0
Stool_refseq	40989	Saccharomonospora_cyanea	5408301	8	0	0			0
Stool_refseq	40990	Saccharomonospora_glauca	4564108	3	0	0			0
Stool_refseq	41170	Exiguobacterium_acetylicum	3396606	1	0	0			0
Stool_refseq	41202	Ewingella_americana	4910581	19	0	0			0
Stool_refseq	41276	Brevundimonas_vesicularis	3345527	6	4	0.666667	94.5396	23	0.00427436
Stool_refseq	41673	Acidianus_brierleyi	2947244	1	0	0			0
Stool_refseq	41899	Burkholderia_plantarii	8081051	3	0	0			0
Stool_refseq	41950	Candidatus_Microthrix_parvicella	4211496	4	0	0			0
Stool_refseq	41976	Porphyromonas_catoniae	2040170	50	0	0			0
Stool_refseq	41977	Azoarcus_communis	5004685	52	0	0			0
Stool_refseq	41986	Agromyces_mediolanus	3861601	11	0	0			0
Stool_refseq	41988	Cryobacterium_psychrophilum	3677616	6	0	0			0
Stool_refseq	41997	Enterococcus_saccharolyticus	2622437	61	0	0			0
Stool_refseq	42055	Chromohalobacter_marismortui	3553220	11	0	0			0
Stool_refseq	42092	Ureaplasma_canigenitalium	835388	1	0	0			0
Stool_refseq	42094	Ureaplasma_diversum	973501	59	0	0			0
Stool_refseq	42197	Actinosynnema_pretiosum	8131572	7	0	0			0
Stool_refseq	42233	Spirilliplanes_yamanashiensis	6544939	11	0	0			0
Stool_refseq	42234	Streptomyces_acidiscabies	11002003	16	0	0			0
Stool_refseq	42236	Streptomyces_diastatochromogenes	10520052	3	0	0			0
Stool_refseq	42238	Streptomyces_neyagawaensis	9979945	3	0	0			0
Stool_refseq	42252	Cupidesulfovibrio_termitidis	4257954	12	2	0.166667	97.0297	1	0.00479103
Stool_refseq	42253	Nitrospira_moscoviensis	4589485	5	0	0			0
Stool_refseq	42256	Rubrobacter_radiotolerans	3398074	17	0	0			0
Stool_refseq	42322	Eubacterium_ruminantium	2841101	1541	145	0.0940947	92.9851	8.86207	0.0293548
Stool_refseq	42354	Nitrosomonas_oligotropha	3119926	12	0	0			0
Stool_refseq	42422	Halobacteroides_halobius	2649255	24	3	0.125	94.4412	11	0.00581295
Stool_refseq	42443	Roseobacter_litoralis	4745450	2	0	0			0
Stool_refseq	42444	Marinovum_algicola	5396756	10	0	0			0
Stool_refseq	42471	Desulfofundulus_thermocisternus	2654868	18	0	0			0
Stool_refseq	42565	Halomonas_salina	3529351	2	0	0			0
Stool_refseq	42566	Halomonas_eurihalina	3842566	7	0	0			0
Stool_refseq	42684	Streptomyces_collinus	8867154	32	0	0			0
Stool_refseq	42817	Corynebacterium_argentoratense	2031902	119	102	0.857143	99.2662	41.3529	0.225749
Stool_refseq	42838	Ammonifex_degensii	2157067	24	0	0			0
Stool_refseq	42858	Mammaliicoccus_lentus	2802382	15	0	0			0
Stool_refseq	42879	Methanococcus_aeolicus	1569500	3	0	0			0
Stool_refseq	42881	Streptomyces_chromofuscus	7483282	3	0	0			0
Stool_refseq	42906	Serratia_entomophila	5147822	19	0	0			0
Stool_refseq	43064	Trichococcus_pasteurii	3234289	6	0	0			0
Stool_refseq	43080	Sulfolobus_islandicus	2586647	1	0	0			0
Stool_refseq	43131	Tissierella_praeacuta	3206559	36	0	0			0
Stool_refseq	43263	Pseudomonas_alcaligenes	4406305	16	1	0.0625	98.2143	42	0.0012936
Stool_refseq	43304	Mycolicibacterium_peregrinum	7050152	17	0	0			0
Stool_refseq	43305	Butyrivibrio_proteoclasticus	4404886	3790	169	0.044591	95.4452	24.8047	0.0412269
Stool_refseq	43354	Prauserella_rugosa	5279998	9	0	0			0
Stool_refseq	43355	Crossiella_cryophila	10058141	10	0	0			0
Stool_refseq	43357	Kutzneria_albida	9874926	25	0	0			0
Stool_refseq	43595	Halanaerobium_saccharolyticum	2873865	99	0	0			0
Stool_refseq	43617	Mesorhizobium_mediterraneum	7256878	9	0	0			0
Stool_refseq	43654	Pseudoalteromonas_aurantia	5602374	32	0	0			0
Stool_refseq	43655	Pseudoalteromonas_citrea	5434598	42	0	0			0
Stool_refseq	43656	Pseudoalteromonas_denitrificans	6094166	9	0	0			0
Stool_refseq	43657	Pseudoalteromonas_luteoviolacea	6043625	93	0	0			0
Stool_refseq	43658	Pseudoalteromonas_rubra	6143755	106	0	0			0
Stool_refseq	43661	Shewanella_benthica	4034511	5	0	0			0
Stool_refseq	43662	Pseudoalteromonas_piscicida	5380608	2	0	0			0
Stool_refseq	43663	Paenarthrobacter_aurescens	4355454	12	0	0			0
Stool_refseq	43664	Paenarthrobacter_histidinolovorans	4652823	22	0	0			0
Stool_refseq	43665	Paenarthrobacter_ilicis	3973023	6	0	0			0
Stool_refseq	43667	Glutamicibacter_uratoxydans	3786014	17	0	0			0
Stool_refseq	43670	Cellulomonas_cellasea	4734929	2	0	0			0
Stool_refseq	43671	Actinotalea_fermentans	3737518	4	0	0			0
Stool_refseq	43674	Jonesia_denitrificans	2749647	5	0	0			0
Stool_refseq	43675	Rothia_mucilaginosa	2255158	286	116	0.405594	95.5503	25.7759	0.233864
Stool_refseq	43677	Promicromonospora_citrea	5016341	11	0	0			0
Stool_refseq	43765	Corynebacterium_amycolatum	2474943	6	0	0			0
Stool_refseq	43767	Prescottella_equi	5438826	12	0	0			0
Stool_refseq	43768	Corynebacterium_matruchotii	2855988	74	29	0.391892	97.8271	37.7931	0.0596991
Stool_refseq	43769	Corynebacterium_propinquum	2480127	92	64	0.695652	98.4496	38.625	0.137251
Stool_refseq	43770	Corynebacterium_striatum	2904831	9	0	0			0
Stool_refseq	43771	Corynebacterium_urealyticum	2377532	23	0	0			0
Stool_refseq	43772	Rhodococcus_zopfii	6297215	7	0	0			0
Stool_refseq	43775	Syntrophus_gentianae	3716692	8	0	0			0
Stool_refseq	43928	Halobaculum_gomorrense	3208246	2	0	0			0
Stool_refseq	43948	Tolumonas_auensis	3471292	8	0	0			0
Stool_refseq	43990	Corynebacterium_segmentosum	2373440	3	3	1	99.67	42	0.00745753
Stool_refseq	43992	Bradyrhizobium_liaoningense	7899289	22	0	0			0
Stool_refseq	43995	Johnsonella_ignava	2687075	580	53	0.0913793	96.3985	30.1321	0.0907306
Stool_refseq	43997	Catonella_morbi	3479204	1642	106	0.0645554	94.3295	14.9151	0.0577431
Stool_refseq	44001	Caldicellulosiruptor_saccharolyticus	2970275	5	0	0			0
Stool_refseq	44007	Enterococcus_pseudoavium	2731874	12	0	0			0
Stool_refseq	44008	Enterococcus_cecorum	2421598	523	127	0.24283	97.5835	8.46457	0.0555831
Stool_refseq	44009	Enterococcus_dispar	2822228	9	0	0			0
Stool_refseq	44010	Mycobacterium_conspicuum	6237139	4	0	0			0
Stool_refseq	44012	Ferrimonas_balearica	4279159	45	0	0			0
Stool_refseq	44060	Streptomyces_megasporus	5850061	2	0	0			0
Stool_refseq	44061	Streptomyces_thermodiastaticus	6105542	6	0	0			0
Stool_refseq	44250	Paenibacillus_alvei	6582090	113	2	0.0176991	91.6667	3	0.000926757
Stool_refseq	44251	Paenibacillus_durus	6053498	52	0	0			0
Stool_refseq	44252	Paenibacillus_macerans	7390297	122	0	0			0
Stool_refseq	44253	Paenibacillus_validus	5535087	1	0	0			0
Stool_refseq	44255	Bradyrhizobium_oligotrophicum	8264165	2	0	0			0
Stool_refseq	44256	Caldanaerobius_polysaccharolyticus	2499862	32	0	0			0
Stool_refseq	44448	Borrelia_persica	1784977	2	0	0			0
Stool_refseq	44467	Mycobacterium_tilburgii	3238528	5	0	0			0
Stool_refseq	44574	Nitrosomonas_communis	4067838	15	0	0			0
Stool_refseq	44575	Nitrosomonas_cryotolerans	2928185	2	0	0			0
Stool_refseq	44576	Nitrosomonas_halophila	3211662	15	0	0			0
Stool_refseq	44577	Nitrosomonas_ureae	3307820	43	0	0			0
Stool_refseq	44671	Geobacter_chapellei	3916219	10	0	0			0
Stool_refseq	44674	Sulfurospirillum_barnesii	2510109	1	0	0			0
Stool_refseq	44676	Geothrix_fermentans	3289813	11	0	0			0
Stool_refseq	44742	Desulfovibrio_fairfieldensis	3699310	964	893	0.926349	98.4119	37.5185	1.35904
Stool_refseq	44749	Sporobacter_termitidis	4198214	918	97	0.105664	95.3363	23.5052	0.0538086
Stool_refseq	44752	Rhodococcus_wratislaviensis	9235301	4	0	0			0
Stool_refseq	44753	Tsukamurella_spumae	4461018	5	0	0			0
Stool_refseq	44754	Fervidobacterium_gondwanense	2146020	3	0	0			0
Stool_refseq	44933	Halomonas_cupida	4957973	4	0	0			0
Stool_refseq	44935	Halomonas_venusta	4437754	1	0	0			0
Stool_refseq	45064	Legionella_fairfieldensis	2664434	8	0	0			0
Stool_refseq	45065	Legionella_geestiana	2666749	12	0	0			0
Stool_refseq	45068	Legionella_londiniensis	2452973	34	0	0			0
Stool_refseq	45070	Legionella_nautarum	3649429	1	0	0			0
Stool_refseq	45072	Legionella_quateirensis	4281523	3	0	0			0
Stool_refseq	45073	Legionella_quinlivanii	3546255	11	0	0			0
Stool_refseq	45074	Legionella_santicrucis	4820916	1	0	0			0
Stool_refseq	45075	Legionella_shakespearei	3507052	6	0	0			0
Stool_refseq	45242	Capnocytophaga_granulosa	2843797	15	0	0			0
Stool_refseq	45243	Capnocytophaga_haemolytica	2688499	4	0	0			0
Stool_refseq	45248	Leucothrix_mucor	5185674	7	0	0			0
Stool_refseq	45254	Dysgonomonas_capnocytophagoides	4784336	103	20	0.194175	99.6322	39.8	0.0282171
Stool_refseq	45361	Mesomycoplasma_conjunctivae	846214	8	0	0			0
Stool_refseq	45363	Metamycoplasma_alkalescens	821059	2	0	0			0
Stool_refseq	45398	Streptomyces_griseoviridis	7872322	2	0	0			0
Stool_refseq	45462	Brevibacillus_borstelensis	5602664	59	0	0			0
Stool_refseq	45465	Vogesella_indigofera	3621567	1	0	0			0
Stool_refseq	45496	Methylophaga_sulfidovorans	3006884	15	0	0			0
Stool_refseq	45497	Schnuerera_ultunensis	3216692	11	0	0			0
Stool_refseq	45498	Helicobacter_cholecystus	1420261	1	0	0			0
Stool_refseq	45610	Psychrobacter_urativorans	3458123	119	0	0			0
Stool_refseq	45611	Psychrobacter_frigidicola	2846672	11	0	0			0
Stool_refseq	45634	Streptococcus_cristatus	2000351	207	43	0.207729	95.771	24.1395	0.123728
Stool_refseq	45655	Desulfonema_magnum	8027777	55	2	0.0363636	94.3396	23	0.000672664
Stool_refseq	45656	Desulfonema_limicola	6908045	144	0	0			0
Stool_refseq	45657	Desulfonema_ishimotonii	6638737	22	0	0			0
Stool_refseq	45663	Desulfohalobium_retbaense	2909567	11	0	0			0
Stool_refseq	45668	Halobacillus_litoralis	4001992	127	0	0			0
Stool_refseq	45670	Salinicoccus_roseus	2557957	35	0	0			0
Stool_refseq	45677	Azohydromonas_lata	7784779	10	2	0.2	98.0392	42	0.00066797
Stool_refseq	45851	Butyrivibrio_crossotus	2521323	5055	2279	0.450841	97.0905	30.9627	1.12861
Stool_refseq	45972	Staphylococcus_pasteuri	2484808	26	0	0			0
Stool_refseq	45979	Nocardia_pseudobrasiliensis	8407941	20	0	0			0
Stool_refseq	46124	Granulicatella_adiacens	1965420	193	121	0.626943	96.5749	29.6116	0.376968
Stool_refseq	46125	Abiotrophia_defectiva	2046826	72	66	0.916667	97.5493	31.7879	0.198112
Stool_refseq	46126	Staphylococcus_chromogenes	2394574	3	0	0			0
Stool_refseq	46127	Staphylococcus_felis	2479423	71	1	0.0140845	93.0693	2	0.00411386
Stool_refseq	46158	Actinomadura_citrea	8992310	7	0	0			0
Stool_refseq	46159	Actinomadura_coerulea	8190213	6	0	0			0
Stool_refseq	46161	Actinomadura_kijaniata	10258935	23	0	0			0
Stool_refseq	46164	Actinomadura_macra	9046351	5	0	0			0
Stool_refseq	46165	Actinomadura_verrucosospora	9018103	6	0	0			0
Stool_refseq	46171	Nonomuraea_africana	9694534	4	0	0			0
Stool_refseq	46172	Nonomuraea_angiospora	13093168	4	0	0			0
Stool_refseq	46175	Microtetraspora_niveoalba	8469978	7	0	0			0
Stool_refseq	46176	Nonomuraea_polychroma	11519774	4	0	0			0
Stool_refseq	46177	Nonomuraea_pusilla	8992127	13	0	0			0
Stool_refseq	46180	Nonomuraea_rubra	12876814	7	0	0			0
Stool_refseq	46182	Nonomuraea_spiralis	11470535	10	0	0			0
Stool_refseq	46206	Pseudobutyrivibrio_ruminis	3020378	5480	120	0.0218978	93.0504	9.4	0.044895
Stool_refseq	46223	Thermoflavimicrobium_dichotomicum	3852792	2	0	0			0
Stool_refseq	46224	Heyndrickxia_sporothermodurans	3857089	18	0	0			0
Stool_refseq	46228	#NAME?	2733858	206232	178100	0.863591	99.3306	39.803	84.6831
Stool_refseq	46240	Paenibacillus_apiarius	6578323	20	0	0			0
Stool_refseq	46256	Weissella_hellenica	1818703	5	0	0			0
Stool_refseq	46257	Pseudomonas_avellanae	5921932	3	0	0			0
Stool_refseq	46351	Mycolicibacterium_hassiacum	5269097	11	0	0			0
Stool_refseq	46353	Agrococcus_jenensis	2962035	2	0	0			0
Stool_refseq	46355	Spirochaeta_africana	3285855	9	0	0			0
Stool_refseq	46356	Alkalispirochaeta_alkalica	3358314	1	0	0			0
Stool_refseq	46429	Sphingobium_chlorophenolicum	4796122	14	0	0			0
Stool_refseq	46469	Orenia_marismortui	3459766	19	0	0			0
Stool_refseq	46503	Parabacteroides_merdae	4403124	947046	789944	0.834114	99.1281	39.8625	63.2356
Stool_refseq	46506	Bacteroides_stercoris	4009829	17233678	14031092	0.814167	98.8338	39.9526	78.9543
Stool_refseq	46507	Ezakiella_coagulans	1806048	172	82	0.476744	97.832	34.5	0.207857
Stool_refseq	46541	Thermosipho_melanesiensis	1915238	2	0	0			0
Stool_refseq	46609	Clostridium_pascui	3828744	21	0	0			0
Stool_refseq	46632	Picrophilus_oshimae	1545895	1	0	0			0
Stool_refseq	46677	Pseudomonas_agarici	5502003	2	0	0			0
Stool_refseq	46680	Pseudomonas_nitroreducens	6229472	19	0	0			0
Stool_refseq	46867	Clostridium_chauvoei	2889569	47	2	0.0425532	100	42	0.00207643
Stool_refseq	46914	Devosia_riboflavina	5052234	2	0	0			0
Stool_refseq	47055	Dethiosulfovibrio_peptidovorans	2576359	1	0	0			0
Stool_refseq	47157	Maridesulfovibrio_bastinii	3909169	22	0	0			0
Stool_refseq	47158	Paucidesulfovibrio_gracilis	3179481	19	0	0			0
Stool_refseq	47229	Massilia_timonae	5969261	5	0	0			0
Stool_refseq	47311	Methanobrevibacter_cuticularis	2608702	4	0	0			0
Stool_refseq	47312	Tsukamurella_pulmonis	4773464	1	0	0			0
Stool_refseq	47421	Hydrogenophaga_pseudoflava	4905973	10	0	0			0
Stool_refseq	47466	Borrelia_miyamotoi	906165	6	0	0			0
Stool_refseq	47479	Streptosporangium_album	9022456	20	0	0			0
Stool_refseq	47492	Xanthobacter_agilis	4827619	12	0	0			0
Stool_refseq	47493	Limosilactobacillus_panis	2006512	32	0	0			0
Stool_refseq	47500	Aneurinibacillus_migulanus	6348994	50	0	0			0
Stool_refseq	47671	Lautropia_mirabilis	3172010	285	269	0.94386	98.1233	37.29	0.383038
Stool_refseq	47678	Bacteroides_caccae	5499725	2460287	2256675	0.917241	99.5879	41.1345	79.1091
Stool_refseq	47679	Sporomusa_sphaeroides	5015343	27	0	0			0
Stool_refseq	47687	Mycoplasmopsis_alligatoris	973030	1	0	0			0
Stool_refseq	47715	Lacticaseibacillus_rhamnosus	2941522	68902	1393	0.0202171	99.5479	40.5707	2.48674
Stool_refseq	47716	Streptomyces_olivaceus	8458055	20	0	0			0
Stool_refseq	47735	Bibersteinia_trehalosi	2340975	24	1	0.0416667	96	40	0.00431444
Stool_refseq	47759	Streptomyces_tubercidicus	8284047	3	0	0			0
Stool_refseq	47760	Streptomyces_aurantiacus	9428393	10	0	0			0
Stool_refseq	47761	Streptomyces_ochraceiscleroticus	8408570	6	0	0			0
Stool_refseq	47763	Streptomyces_lydicus	8243179	17	0	0			0
Stool_refseq	47770	Lactobacillus_crispatus	2039404	264	79	0.299242	97.369	35.5316	0.18981
Stool_refseq	47834	Spiroplasma_kunkelii	1514561	1	0	0			0
Stool_refseq	47839	Mycobacterium_triplex	6366285	4	0	0			0
Stool_refseq	47847	Brachybacterium_nesterenkovii	3021972	5	2	0.4	98.9515	42	0.00562547
Stool_refseq	47848	Brachybacterium_tyrofermentans	4407399	9	0	0			0
Stool_refseq	47850	Micromonospora_aurantiaca	7025559	5	0	0			0
Stool_refseq	47853	Micromonospora_carbonacea	7528335	5	0	0			0
Stool_refseq	47854	Micromonospora_chersina	6683691	1	0	0			0
Stool_refseq	47855	Micromonospora_citrea	7208999	12	0	0			0
Stool_refseq	47857	Micromonospora_echinaurantiaca	7203233	5	0	0			0
Stool_refseq	47858	Micromonospora_echinofusca	7002627	27	0	0			0
Stool_refseq	47864	Micromonospora_halophytica	6275885	5	0	0			0
Stool_refseq	47865	Micromonospora_inositola	6708094	7	0	0			0
Stool_refseq	47866	Micromonospora_inyonensis	6923970	2	0	0			0
Stool_refseq	47871	Micromonospora_peucetia	7365767	4	0	0			0
Stool_refseq	47872	Micromonospora_purpureochromogenes	6674234	10	0	0			0
Stool_refseq	47874	Micromonospora_rosaria	7383286	11	0	0			0
Stool_refseq	47875	Micromonospora_sagamiensis	6930736	3	0	0			0
Stool_refseq	47877	Pseudomonas_amygdali	6201720	3	0	0			0
Stool_refseq	47878	Pseudomonas_azotoformans	6727386	3	0	0			0
Stool_refseq	47879	Pseudomonas_corrugata	6124363	6	0	0			0
Stool_refseq	47880	Pseudomonas_fulva	5398139	11	0	0			0
Stool_refseq	47882	Pseudomonas_straminea	4992198	1	0	0			0
Stool_refseq	47883	Pseudomonas_synxantha	6562330	5	0	0			0
Stool_refseq	47884	Pseudomonas_taetrolens	4843871	19	0	0			0
Stool_refseq	47885	Pseudomonas_oryzihabitans	4986278	6	0	0			0
Stool_refseq	47886	Pseudomonas_luteola	5901383	1	0	0			0
Stool_refseq	47917	Serratia_fonticola	6000511	27	0	0			0
Stool_refseq	47920	Acidovorax_delafieldii	5022177	13	0	0			0
Stool_refseq	47951	Vibrio_cyclitrophicus	5074401	1	0	0			0
Stool_refseq	47958	Methylorubrum_thiocyanatum	5637136	1	0	0			0
Stool_refseq	47960	Guyparkeria_halophila	2452836	2	0	0			0
Stool_refseq	47988	Actinoplanes_auranticolor	9878734	13	0	0			0
Stool_refseq	47989	Dactylosporangium_roseum	8220997	18	0	0			0
Stool_refseq	47994	Leptothrix_mobilis	4651965	2	0	0			0
Stool_refseq	48003	Mycoplasmopsis_pullorum	953874	13	0	0			0
Stool_refseq	48074	Microbulbifer_hydrolyticus	4209307	2	0	0			0
Stool_refseq	48076	Marinobacterium_georgiense	4053293	9	0	0			0
Stool_refseq	48256	Ruminiclostridium_hungatei	4901053	290	2	0.00689655	93.0081	8	0.00185674
Stool_refseq	48292	Hyphomicrobium_zavarzinii	4651795	7	0	0			0
Stool_refseq	48296	Acinetobacter_pittii	3862530	53	1	0.0188679	100	42	0.00264076
Stool_refseq	48464	Prosthecobacter_fusiformis	5828112	14	0	0			0
Stool_refseq	48465	Prosthecobacter_dejongeii	5995932	96	0	0			0
Stool_refseq	48466	Prosthecobacter_vanneervenii	6662711	28	0	0			0
Stool_refseq	48467	Prosthecobacter_debontii	6292356	9	0	0			0
Stool_refseq	48664	Xanthomonas_fragariae	4328441	9	2	0.222222	100	42	0.00325752
Stool_refseq	48729	Rhabdochromatium_marinum	4363877	3	0	0			0
Stool_refseq	48782	Leptospira_fainei	4287324	8	0	0			0
Stool_refseq	48935	Novosphingobium_aromaticivorans	4233314	2	0	0			0
Stool_refseq	49186	Marinobacterium_stanieri	4680330	7	0	0			0
Stool_refseq	49280	Gelidibacter_algens	4459459	33	0	0			0
Stool_refseq	49283	Paenibacillus_thiaminolyticus	6612542	86	0	0			0
Stool_refseq	49319	Rubrobacter_xylanophilus	3225748	18	0	0			0
Stool_refseq	49338	Desulfitobacterium_hafniense	5279134	106	0	0			0
Stool_refseq	49447	Halochromatium_salexigens	3828867	12	0	0			0
Stool_refseq	49547	Methanobrevibacter_curvatus	2414608	4	0	0			0
Stool_refseq	49897	Mycobacterium_hodleri	6529154	12	0	0			0
Stool_refseq	49900	Thermococcus_stetteri	2034780	5	0	0			0
Stool_refseq	50052	Mycoplasma_crocodyli	934379	1	0	0			0
Stool_refseq	50338	Rhizobium_sullae	7595929	11	0	0			0
Stool_refseq	50715	Acidisphaera_rubrifaciens	3862273	14	1	0.0714286	97.0588	40	0.00178651
Stool_refseq	50719	Vibrio_diabolicus	5108924	49	0	0			0
Stool_refseq	50960	Helicobacter_trogontum	2446321	6	0	0			0
Stool_refseq	51047	Actinobacillus_minor	2425264	13	0	0			0
Stool_refseq	51048	Actinobacillus_porcinus	2276241	11	0	0			0
Stool_refseq	51049	Actinobacillus_indolicus	2251645	10	0	0			0
Stool_refseq	51101	Brevibacillus_agri	5374818	8	0	0			0
Stool_refseq	51160	Treponema_maltophilum	2530388	11	4	0.363636	93.0233	4.25	0.00339869
Stool_refseq	51161	Actinobacillus_delphinicola	1837244	8	4	0.5	92.7612	6.75	0.0113757
Stool_refseq	51173	Ureibacillus_thermosphaericus	3488104	130	0	0			0
Stool_refseq	51195	Desulfofustis_glycolicus	4977298	15	0	0			0
Stool_refseq	51197	Syntrophobotulus_glycolicus	3406739	63	2	0.031746	96.7213	40	0.00181992
Stool_refseq	51201	Streptomyces_griseocarneus	7375626	3	0	0			0
Stool_refseq	51288	Kluyvera_ascorbata	5062542	18	2	0.111111	98.7179	42	0.00156048
Stool_refseq	51363	Metamycoplasma_auris	750874	3	0	0			0
Stool_refseq	51364	Mycoplasma_cottewii	1016659	1	0	0			0
Stool_refseq	51365	Mycoplasma_yeatsii	895051	2	0	0			0
Stool_refseq	51367	Salinivibrio_costicola	3381657	4	0	0			0
Stool_refseq	51515	Dehalobacterium_formicoaceticum	3766545	141	0	0			0
Stool_refseq	51589	Haloarcula_hispanica	3890005	2	0	0			0
Stool_refseq	51616	Desulfitobacterium_chlororespirans	5606984	25	0	0			0
Stool_refseq	51642	Nitrosomonas_mobilis	3082864	18	0	0			0
Stool_refseq	51663	Pediococcus_damnosus	2173661	2	0	0			0
Stool_refseq	51664	Lapidilactobacillus_dextrinicus	1836976	16	0	0			0
Stool_refseq	51665	Aerococcus_urinaeequi	2013339	29	2	0.0689655	93.9994	23	0.00506621
Stool_refseq	51669	Tetragenococcus_halophilus	2389470	52	0	0			0
Stool_refseq	51670	Hyphomicrobium_facile	4425354	7	0	0			0
Stool_refseq	52004	Natroniella_acetigena	2625838	56	0	0			0
Stool_refseq	52021	Halomonas_desiderata	4737211	10	0	0			0
Stool_refseq	52022	Meiothermus_silvanus	3721669	22	18	0.818182	98.8094	42	0.0147783
Stool_refseq	52131	Rhizobium_hainanense	7252624	4	0	0			0
Stool_refseq	52133	Acinetobacter_venetianus	3458264	2	0	0			0
Stool_refseq	52226	Mitsuokella_multacida	2577056	313	5	0.0159744	93.7554	13.8	0.00791601
Stool_refseq	52227	Prevotella_dentalis	3350206	36	3	0.0833333	95.6496	23	0.00498477
Stool_refseq	52229	Hallella_seregens	3266753	42	5	0.119048	94.2611	15.8	0.00860181
Stool_refseq	52242	Lactobacillus_gallinarum	2020091	2	0	0			0
Stool_refseq	52259	Streptomyces_humidus	9711080	14	0	0			0
Stool_refseq	52441	Nitrosomonas_aestuarii	3442742	52	0	0			0
Stool_refseq	52442	Nitrosomonas_nitrosa	3420013	25	0	0			0
Stool_refseq	52443	Vibrio_tapetis	5198666	6	0	0			0
Stool_refseq	52560	Desulfomicrobium_apsheronum	4254075	10	0	0			0
Stool_refseq	52561	Desulfomicrobium_norvegicum	4352996	5	0	0			0
Stool_refseq	52584	Brachyspira_pilosicoli	2586443	105	10	0.0952381	97.8835	39.9	0.0262523
Stool_refseq	52598	Sulfitobacter_sp._EE-36	3548498	1	0	0			0
Stool_refseq	52603	Sagittula_stellata	5290610	6	0	0			0
Stool_refseq	52689	Acetobacterium_bakii	4319181	117	2	0.017094	93.1034	8	0.001366
Stool_refseq	52691	Acetobacterium_fimetarium	3237487	178	0	0			0
Stool_refseq	52692	Acetobacterium_malicum	4077227	45	0	0			0
Stool_refseq	52693	Acetobacterium_paludosum	3691131	67	1	0.0149254	93.2039	3	0.00281756
Stool_refseq	52694	Acetobacterium_wieringae	3711234	189	2	0.010582	94.1176	23	0.00140115
Stool_refseq	52695	Actinoplanes_brasiliensis	9750342	20	0	0			0
Stool_refseq	52696	Actinoplanes_cyaneus	10358347	16	0	0			0
Stool_refseq	52697	Actinoplanes_regularis	10031706	11	0	0			0
Stool_refseq	52698	Saccharomonospora_iraqiensis	4669397	16	0	0			0
Stool_refseq	52699	Aeromicrobium_fastidiosum	3925785	10	0	0			0
Stool_refseq	52704	Clostridium_vincentii	3505833	157	0	0			0
Stool_refseq	52764	Bartonella_alsatica	1659117	21	0	0			0
Stool_refseq	52768	Schaalia_georgiae	2498023	22	10	0.454545	98.1702	34.2	0.0140511
Stool_refseq	52769	Actinomyces_gerencseriae	3420019	25	15	0.6	98.1269	37.0667	0.0238888
Stool_refseq	52770	Buchananella_hordeovulneris	2521171	9	0	0			0
Stool_refseq	52771	Actinomyces_howellii	3148934	5	0	0			0
Stool_refseq	52773	Schaalia_meyeri	2033037	42	3	0.0714286	92.2051	3	0.00821431
Stool_refseq	52774	Actinomyces_slackii	3220508	3	0	0			0
Stool_refseq	53245	Desulfonatronovibrio_hydrogenovorans	2939696	1	0	0			0
Stool_refseq	53254	Bosea_thiooxidans	5369373	1	0	0			0
Stool_refseq	53329	Desulfospira_joergensenii	6119470	19	1	0.0526316	94	23	0.000833406
Stool_refseq	53332	Desulfobulbus_elongatus	3961953	57	0	0			0
Stool_refseq	53336	Tatumella_citrea	4491252	4	0	0			0
Stool_refseq	53341	Xenorhabdus_japonica	3561198	2	0	0			0
Stool_refseq	53342	Caloramator_proteoclasticus	2655018	11	0	0			0
Stool_refseq	53343	Desulforamulus_aeronauticus	4020963	16	0	0			0
Stool_refseq	53344	Staphylococcus_delphini	2616750	51	0	0			0
Stool_refseq	53345	Enterococcus_durans	2988928	369	0	0			0
Stool_refseq	53346	Enterococcus_mundtii	3504528	10	0	0			0
Stool_refseq	53358	Intrasporangium_calvum	4024382	1	0	0			0
Stool_refseq	53359	Dactylosporangium_fulvum	10494953	33	0	0			0
Stool_refseq	53360	Dactylosporangium_matsuzakiense	11766240	8	0	0			0
Stool_refseq	53362	Dactylosporangium_vinaceum	11959907	12	0	0			0
Stool_refseq	53363	Brevibacterium_mcbrellneri	2561804	1	0	0			0
Stool_refseq	53366	Catellatospora_citrea	9360966	14	0	0			0
Stool_refseq	53367	Asanoa_ferruginea	9071909	12	0	0			0
Stool_refseq	53368	Hamadaea_tsunoensis	9478888	27	0	0			0
Stool_refseq	53371	Pilimelia_anulata	5160904	6	0	0			0
Stool_refseq	53372	Pilimelia_terevasa	4535755	56	0	0			0
Stool_refseq	53374	Corynebacterium_coyleae	2510261	3	1	0.333333	94.0594	23	0.00406332
Stool_refseq	53376	Mycobacterium_heidelbergense	5050576	4	0	0			0
Stool_refseq	53378	Mycobacterium_paraffinicum	5402488	8	0	0			0
Stool_refseq	53399	Hyphomicrobium_denitrificans	3638969	4	0	0			0
Stool_refseq	53406	Pseudomonas_anguilliseptica	5229617	1	0	0			0
Stool_refseq	53408	Pseudomonas_citronellolis	6951444	2	0	0			0
Stool_refseq	53409	Pseudomonas_coronafaciens	5714458	10	0	0			0
Stool_refseq	53412	Pseudomonas_resinovorans	6027681	7	0	0			0
Stool_refseq	53413	Xanthomonas_axonopodis	4919079	2	0	0			0
Stool_refseq	53414	Xanthomonas_populi	4338173	1	0	0			0
Stool_refseq	53417	Lonepinella_koalarum	2550855	9	2	0.222222	98.5915	42	0.00282258
Stool_refseq	53419	Treponema_socranskii	2805741	45	0	0			0
Stool_refseq	53422	Thermobrachium_celere	2644756	119	1	0.00840336	93.9394	23	0.00378107
Stool_refseq	53423	Thermodesulfovibrio_islandicus	2048874	2	0	0			0
Stool_refseq	53427	Gordonia_hirsuta	3489460	1	0	0			0
Stool_refseq	53428	Nocardia_crassostreae	8293148	17	0	0			0
Stool_refseq	53429	Nocardia_flavorosea	7440171	27	0	0			0
Stool_refseq	53432	Nocardia_uniformis	8766665	21	0	0			0
Stool_refseq	53437	Nocardiopsis_alba	5861114	2	0	0			0
Stool_refseq	53441	Nocardiopsis_lucentensis	6325274	10	0	0			0
Stool_refseq	53442	Eubacterium_callanderi	4316707	1413	97	0.0686483	97.8893	33.4433	0.131559
Stool_refseq	53443	Blautia_hydrogenotrophica	3597785	3596	1227	0.341212	99.2443	38.3293	1.83085
Stool_refseq	53444	Fructilactobacillus_lindneri	1389742	28	0	0			0
Stool_refseq	53446	Streptomyces_cinnamoneus	6662690	53	0	0			0
Stool_refseq	53458	Janibacter_limosus	3378259	10	2	0.2	96.1538	24	0.00156886
Stool_refseq	53461	Nakamurella_multipartita	6060298	9	0	0			0
Stool_refseq	53462	Mycolicibacterium_mageritense	8006721	24	0	0			0
Stool_refseq	53463	Paracoccus_solventivorans	3377602	1	0	0			0
Stool_refseq	53483	Polaribacter_filamentus	4281931	3	0	0			0
Stool_refseq	53522	Thermobifida_alba	4903256	12	0	0			0
Stool_refseq	53635	Acidimicrobium_ferrooxidans	2158157	10	0	0			0
Stool_refseq	53953	Pyrococcus_horikoshii	1738505	4	0	0			0
Stool_refseq	53972	Rhodococcus_corynebacterioides	3977374	7	0	0			0
Stool_refseq	54005	Peptoniphilus_harei	1929566	48	3	0.0625	98.451	42	0.00922487
Stool_refseq	54006	Peptoniphilus_ivorii	1621107	63	0	0			0
Stool_refseq	54007	Anaerococcus_octavius	1914290	23	6	0.26087	99.5935	42	0.00757461
Stool_refseq	54010	Pseudonocardia_asaccharolytica	5056835	13	0	0			0
Stool_refseq	54011	Pseudonocardia_sulfidoxydans	6576285	1	0	0			0
Stool_refseq	54062	Pediococcus_parvulus	2163309	10	0	0			0
Stool_refseq	54067	Xylophilus_ampelinus	3731505	12	0	0			0
Stool_refseq	54076	Thermococcus_zilligii	1764559	2	0	0			0
Stool_refseq	54120	Methanolacinia_petrolearia	2843290	2	0	0			0
Stool_refseq	54121	Halanaerobium_congolense	2831374	50	0	0			0
Stool_refseq	54254	Thermosphaera_aggregans	1316595	2	0	0			0
Stool_refseq	54261	Ferroglobus_placidus	2196266	2	0	0			0
Stool_refseq	54265	Carboxydothermus_ferrireducens	2441992	7	0	0			0
Stool_refseq	54291	Raoultella_ornithinolytica	5952440	39	12	0.307692	98.3041	38.3333	0.00265437
Stool_refseq	54294	Thermosyntropha_lipolytica	2169229	13	0	0			0
Stool_refseq	54297	Limnospira_fusiformis	5209155	3	0	0			0
Stool_refseq	54306	Planktothrix_mougeotii	6226999	10	0	0			0
Stool_refseq	54398	endosymbiont_of_Ridgeia_piscesae	3442017	8	0	0			0
Stool_refseq	54571	Streptomyces_venezuelae	8223505	45	0	0			0
Stool_refseq	54736	Salmonella_bongori	4460105	29	0	0			0
Stool_refseq	54767	Oceanidesulfovibrio_indonesiensis	4286425	18	1	0.0555556	94.0594	23	0.00237961
Stool_refseq	54910	Brevibacillus_centrosporus	6242354	11	0	0			0
Stool_refseq	54911	Brevibacillus_choshinensis	6279095	72	0	0			0
Stool_refseq	54913	Brevibacillus_formosus	6215362	44	0	0			0
Stool_refseq	54914	Brevibacillus_parabrevis	6088079	14	0	0			0
Stool_refseq	54915	Brevibacillus_reuszeri	6986486	279	0	0			0
Stool_refseq	55085	Streptococcus_thoraltensis	2385218	5	0	0			0
Stool_refseq	55148	Deinococcus_proteolyticus	2886836	14	0	0			0
Stool_refseq	55197	Flavobacterium_branchiophilum	3563292	20	0	0			0
Stool_refseq	55205	Caldicellulosiruptor_owensensis	2428903	4	0	0			0
Stool_refseq	55206	Sediminispirochaeta_smaragdinae	4653970	12	0	0			0
Stool_refseq	55207	Pectobacterium_betavasculorum	4685213	1	0	0			0
Stool_refseq	55209	Pantoea_cypripedii	6553825	28	0	0			0
Stool_refseq	55211	Erwinia_persicina	4802925	79	0	0			0
Stool_refseq	55213	Brenneria_rubrifaciens	4133520	8	0	0			0
Stool_refseq	55214	Brenneria_salicis	4045881	4	0	0			0
Stool_refseq	55218	Ruegeria_lacuscaerulensis	4593455	10	0	0			0
Stool_refseq	55395	Bradyrhizobium_sp._NC92	8355732	1	0	0			0
Stool_refseq	55404	Streptomyces_netropsis	8144008	1	0	0			0
Stool_refseq	55504	Sporomusa_silvacetica	6046356	18	0	0			0
Stool_refseq	55505	Thermonema_rossianum	2954967	2	0	0			0
Stool_refseq	55507	Schwartzia_succinivorans	2659575	153	3	0.0196078	94.8092	22.6667	0.004324
[truncated: 105,322 more rows]

## Sheet: S4B Marine
Table S4B. Genome Coverage Checker output for Marine samples. Marine_refseq refers to the reads from all samples combined.
Sample	taxid	Species name	Reference genome length (bp)	Kraken reads assigned	Bowtie2 reads mapped	Proportion kraken reads mapped with Bowtie2	Bowtie2 mean identity of mapped reads (%)	Bowtie2 mean MAPQ of mapped reads	Bowtie2 genome fraction (%)
Marine_refseq	9	Buchnera_aphidicola	641454	396323	78	0.000196809	93.1419	8.66667	0.223555
Marine_refseq	11	Cellulomonas_gilvus	3526441	601	2	0.00332779	100	42	0.00482072
Marine_refseq	14	Dictyoglomus_thermophilum	1959987	6135	0	0			0
Marine_refseq	17	Methylophilus_methylotrophus	2860219	953	2	0.00209864	94.765	21.5	0.00748194
Marine_refseq	19	Syntrophotalea_carbinolica	3665893	1344	0	0			0
Marine_refseq	21	Phenylobacterium_immobile	3328570	567	7	0.0123457	97.4771	27.5714	0.0179957
Marine_refseq	23	Shewanella_colwelliana	4642543	2648	0	0			0
Marine_refseq	24	Shewanella_putrefaciens	4386330	3302	1	0.000302847	94.0594	8	0.00232541
Marine_refseq	25	Shewanella_hanedai	5939027	3273	5	0.00152765	95.3409	23.2	0.00777905
Marine_refseq	33	Myxococcus_fulvus	10824667	787	0	0			0
Marine_refseq	34	Myxococcus_xanthus	9139763	1343	0	0			0
Marine_refseq	35	Corallococcus_macrosporus	8973512	1564	1	0.000639386	93.0693	3	0.00113668
Marine_refseq	41	Stigmatella_aurantiaca	9365767	1572	0	0			0
Marine_refseq	43	Cystobacter_fuscus	12282374	1760	0	0			0
Marine_refseq	48	Archangium_gephyra	12489432	1268	0	0			0
Marine_refseq	51	Chondromyces_apiculatus	11577721	3298	7	0.0021225	92.9825	9	0.00496644
Marine_refseq	52	Chondromyces_crocatus	11388132	2729	8	0.00293148	92.8518	9.375	0.00434663
Marine_refseq	54	Nannocystis_exedens	12059053	2803	4	0.00142704	91.6133	4	0.00296872
Marine_refseq	56	Sorangium_cellulosum	13033779	15504	29	0.00187049	94.1745	15.4138	0.0120073
Marine_refseq	61	Vitreoscilla_stercoraria	2661781	1466	0	0			0
Marine_refseq	63	Vitreoscilla_filiformis	3787551	411	0	0			0
Marine_refseq	69	Lysobacter_enzymogenes	6096022	3436	0	0			0
Marine_refseq	72	Simonsiella_muelleri	2469862	2306	1	0.000433651	92.1569	3	0.00210538
Marine_refseq	84	Hyphomicrobium_methylovorum	3445405	824	2	0.00242718	93.2121	13.5	0.00449875
Marine_refseq	86	Hyphomonas_jannaschiana	3640843	13228	4482	0.338827	95.3029	22.9478	9.81657
Marine_refseq	94	Stella_humosa	5832650	3581	70	0.0195476	95.0141	4.32857	0.0350784
Marine_refseq	100	Ancylobacter_aquaticus	4831989	638	0	0			0
Marine_refseq	102	Polaribacter_glomeratus	4064562	11103	4	0.000360263	95.5446	26.75	0.010038
Marine_refseq	103	Flectobacillus_major	6221030	4494	0	0			0
Marine_refseq	104	Cyclobacterium_marinum	6221273	13465	1148	0.0852581	99.0054	39.2909	1.50143
Marine_refseq	106	Runella_slithyformis	6919729	2657	0	0			0
Marine_refseq	114	Gemmata_obscuriglobus	8998893	1273	0	0			0
Marine_refseq	119	Rubinisphaera_brasiliensis	6006602	28086	15418	0.548957	98.7049	39.2253	20.0875
Marine_refseq	120	Planctopirus_limnophila	5460085	1146	1	0.0008726	92.5926	23	0.00100731
Marine_refseq	122	Gimesia_maris	7816689	3804	83	0.0218191	97.1689	32.6145	0.0956287
Marine_refseq	124	Blastopirellula_marina	6663851	5863	2	0.000341122	95.0198	23.5	0.00304629
Marine_refseq	128	Isosphaera_pallida	5529304	1201	3	0.00249792	95.6465	1.66667	0.00363518
Marine_refseq	134	Methylocystis_parvus	4529117	824	0	0			0
Marine_refseq	139	Borreliella_burgdorferi	1321434	3319	0	0			0
Marine_refseq	140	Borrelia_hermsii	1161689	3365	0	0			0
Marine_refseq	141	Borrelia_parkeri	1030684	708	0	0			0
Marine_refseq	143	Borrelia_anserina	1042690	1489	0	0			0
Marine_refseq	144	Borrelia_coriaceae	1787333	2514	0	0			0
Marine_refseq	148	Sediminispirochaeta_bajacaliforniensis	4576607	588	0	0			0
Marine_refseq	150	Spirochaeta_isovalerica	4875193	3793	0	0			0
Marine_refseq	154	Spirochaeta_thermophila	2560222	923	1	0.00108342	91.8033	3	0.00242166
Marine_refseq	156	Treponema_zuelzerae	3621248	474	0	0			0
Marine_refseq	158	Treponema_denticola	2843201	6982	1	0.000143225	94.1748	23	0.00365785
Marine_refseq	159	Brachyspira_hyodysenteriae	3085162	9019	22	0.00243929	94.7787	20.1818	0.00962672
Marine_refseq	162	Treponema_phagedenis	3372116	2197	0	0			0
Marine_refseq	163	Treponema_bryantii	3516600	5909	0	0			0
Marine_refseq	164	Treponema_pectinovorum	2224027	3206	1	0.000311915	96.0396	24	0.00458628
Marine_refseq	165	Treponema_saccharophilum	3459320	867	3	0.00346021	93.9281	18	0.00638854
Marine_refseq	167	Treponema_succinifaciens	2897425	2078	0	0			0
Marine_refseq	172	Leptospira_biflexa	3951448	4420	0	0			0
Marine_refseq	173	Leptospira_interrogans	4630763	6917	1	0.000144571	98.1481	1	0.00235382
Marine_refseq	174	Leptospira_borgpetersenii	3992782	2000	0	0			0
Marine_refseq	180	Leptospirillum_ferrooxidans	2559538	1614	0	0			0
Marine_refseq	183	Leptonema_illini	4522760	886	11	0.0124153	98.1388	1.18182	0.00756175
Marine_refseq	188	Magnetospirillum_magnetotacticum	4523935	1298	1	0.000770416	93	3	0.00223257
Marine_refseq	189	Novispirillum_itersonii	4290651	3371	4	0.00118659	93.1119	13	0.0075513
Marine_refseq	190	Aquaspirillum_serpens	2612795	1719	1	0.000581734	92.3077	3	0.00302358
Marine_refseq	192	Azospirillum_brasilense	7030811	4395	1	0.000227531	94.3396	23	0.000768048
Marine_refseq	193	Azospirillum_lipoferum	7987183	1630	7	0.00429448	94.4331	20.7143	0.00527094
Marine_refseq	195	Campylobacter_coli	1716536	28949	0	0			0
Marine_refseq	196	Campylobacter_fetus	1804582	9737	0	0			0
Marine_refseq	197	Campylobacter_jejuni	1641481	21139	9	0.000425753	96.5923	1	0.0287545
Marine_refseq	198	Campylobacter_hyointestinalis	1808149	8095	0	0			0
Marine_refseq	199	Campylobacter_concisus	1840041	41174	1	2.42872e-05	95.5224	24	0.00369557
Marine_refseq	200	Campylobacter_curvus	1974918	1885	0	0			0
Marine_refseq	201	Campylobacter_lari	1488515	23002	0	0			0
Marine_refseq	202	Campylobacter_mucosalis	1773478	4487	0	0			0
Marine_refseq	203	Campylobacter_rectus	2571679	947	4	0.00422386	98.7767	24	0.0120155
Marine_refseq	204	Campylobacter_showae	2097887	2538	5	0.00197006	95.7617	26.8	0.0211642
Marine_refseq	206	Campylobacter_sputorum	1753386	6701	0	0			0
Marine_refseq	210	Helicobacter_pylori	1696601	51236	59	0.00115153	96.8321	1.0339	0.0534009
Marine_refseq	212	Helicobacter_acinonychis	1557588	481	0	0			0
Marine_refseq	213	Helicobacter_cinaedi	2101402	3590	0	0			0
Marine_refseq	214	Helicobacter_felis	1672681	1738	0	0			0
Marine_refseq	215	Helicobacter_fennelliae	2223074	2827	0	0			0
Marine_refseq	216	Helicobacter_muridarum	2263336	4740	1	0.00021097	94.0594	8	0.00450662
Marine_refseq	217	Helicobacter_mustelae	1576607	1323	1	0.000755858	90.4762	3	0.00374221
Marine_refseq	227	Pseudoalteromonas_carrageenovora	4584980	1164	154	0.132302	96.5462	28.039	0.252586
Marine_refseq	238	Elizabethkingia_meningoseptica	3874791	6221	4	0.000642983	93.0689	2.25	0.00536803
Marine_refseq	244	Planomicrobium_okeanokoites	3434210	727	13	0.0178817	98.0153	40.0769	0.0356414
Marine_refseq	245	Flavobacterium_aquatile	3490856	8736	11	0.00125916	97.0826	28.2727	0.0233467
Marine_refseq	246	Chryseobacterium_balustinum	4974086	929	0	0			0
Marine_refseq	247	Empedobacter_brevis	3792478	7856	6	0.000763747	97.3219	33.3333	0.0119711
Marine_refseq	249	Terrimonas_ferruginea	4686152	1028	3	0.00291829	87.8712	2.33333	0.00356369
Marine_refseq	250	Chryseobacterium_gleum	5643321	3885	0	0			0
Marine_refseq	251	Psychroflexus_gondwanensis	3311768	9098	4	0.000439657	93.8091	11.75	0.0123197
Marine_refseq	252	Halomonas_halmophila	3253825	1036	10	0.00965251	93.5019	13.6	0.0243406
Marine_refseq	253	Chryseobacterium_indologenes	4929686	8424	0	0			0
Marine_refseq	254	Chryseobacterium_indoltheticum	4253895	6107	3	0.00049124	94.3762	16.6667	0.0071699
Marine_refseq	256	Myroides_odoratus	4242475	13482	3	0.000222519	92.509	2.66667	0.00478494
Marine_refseq	258	Sphingobacterium_spiritivorum	5138280	11056	2	0.000180897	89.3998	2	0.00389235
Marine_refseq	259	Sphingobacterium_thalpophilum	5962893	2344	0	0			0
Marine_refseq	263	Francisella_tularensis	1870206	8143	4	0.000491219	94.1031	8	0.0137953
Marine_refseq	266	Paracoccus_denitrificans	5242327	1434	73	0.0509066	95.6885	21.2466	0.0928977
Marine_refseq	267	Paracoccus_sp.	3284009	116	0	0			0
Marine_refseq	271	Thermus_aquaticus	2338641	454	0	0			0
Marine_refseq	274	Thermus_thermophilus	2116056	1288	4	0.00310559	98.6121	31.75	0.0171546
Marine_refseq	276	Thermus_filiformis	2386081	347	1	0.00288184	91.5493	3	0.0030175
Marine_refseq	277	Meiothermus_ruber	3097457	443	1	0.00225734	99	42	0.00326074
Marine_refseq	280	Xanthobacter_autotrophicus	5013287	1093	0	0			0
Marine_refseq	281	Xanthobacter_flavus	5768244	1237	78	0.0630558	95.2231	23.5641	0.119828
Marine_refseq	285	Comamonas_testosteroni	5497097	2063	1	0.000484731	95.0495	23	0.00185552
Marine_refseq	287	Pseudomonas_aeruginosa	6264404	30981	94	0.00303412	96.723	2.61702	0.0675244
Marine_refseq	292	Burkholderia_cepacia	8366868	5102	22	0.00431203	96.6368	2.54545	0.00565325
Marine_refseq	293	Brevundimonas_diminuta	3438815	2170	36	0.0165899	95.5017	24.9444	0.0882862
Marine_refseq	294	Pseudomonas_fluorescens	6511547	17261	15	0.000869011	94.8735	12.2	0.0164938
Marine_refseq	296	Pseudomonas_fragi	5077209	2818	11	0.00390348	96.9777	30.6364	0.0162688
Marine_refseq	297	Hydrogenophilus_thermoluteolus	2288780	604	0	0			0
Marine_refseq	298	Pseudomonas_marginalis	6799674	825	1	0.00121212	99.0741	42	0.00160302
Marine_refseq	300	Pseudomonas_mendocina	5372474	4417	36	0.00815033	93.7569	12.8333	0.0513171
Marine_refseq	301	Pseudomonas_oleovorans	4686340	1767	42	0.0237691	95.4512	21.7857	0.0568674
Marine_refseq	303	Pseudomonas_putida	6156701	11681	18	0.00154096	96.3517	24.6667	0.0278396
Marine_refseq	304	Pelomonas_saccharophila	5771016	897	10	0.0111483	95.4682	21.8	0.0146941
Marine_refseq	305	Ralstonia_solanacearum	5530249	3098	0	0			0
Marine_refseq	316	Stutzerimonas_stutzeri	4545686	45206	388	0.00858293	94.4624	16.4639	0.722729
Marine_refseq	317	Pseudomonas_syringae	5868373	29889	21	0.0007026	97.3966	4.47619	0.013888
Marine_refseq	329	Ralstonia_pickettii	5254771	1606	351	0.218555	96.9888	32.9544	0.610588
Marine_refseq	337	Burkholderia_glumae	6820727	1248	0	0			0
Marine_refseq	339	Xanthomonas_campestris	4942039	4868	28	0.00575185	96.902	28.6429	0.0382433
Marine_refseq	343	Xanthomonas_translucens	4649333	2057	9	0.0043753	97.5491	1.55556	0.0106682
Marine_refseq	346	Xanthomonas_citri	5222255	881	0	0			0
Marine_refseq	347	Xanthomonas_oryzae	4846413	1798	1	0.000556174	89.8551	2	0.00144437
Marine_refseq	350	Zoogloea_ramigera	4605859	1081	0	0			0
Marine_refseq	353	Azotobacter_chroococcum	5023055	1786	3	0.00167973	93.7159	11.6667	0.00527567
Marine_refseq	354	Azotobacter_vinelandii	5365318	713	2	0.00280505	95.2199	22.5	0.00305667
Marine_refseq	358	Agrobacterium_tumefaciens	6002464	9362	23	0.00245674	94.7199	18.087	0.0339694
Marine_refseq	359	Agrobacterium_rhizogenes	6215524	3046	0	0			0
Marine_refseq	373	Agrobacterium_vitis	5754491	11427	5	0.00043756	92.1027	11	0.00424017
Marine_refseq	375	Bradyrhizobium_japonicum	9226248	3411	4	0.00117268	93.925	14.5	0.00389107
Marine_refseq	380	Sinorhizobium_fredii	6810864	2217	1	0.00045106	91.0891	3	0.00149761
Marine_refseq	381	Mesorhizobium_loti	7451806	3192	4	0.00125313	93.4495	15.5	0.00366354
Marine_refseq	382	Sinorhizobium_meliloti	6926935	4778	14	0.0029301	95.9504	2.78571	0.0135702
Marine_refseq	384	Rhizobium_leguminosarum	7598116	15830	21	0.0013266	93.1988	7.42857	0.0206762
Marine_refseq	396	Rhizobium_phaseoli	6726041	1133	3	0.00264784	93.0462	4.66667	0.00224501
Marine_refseq	398	Rhizobium_tropici	6686334	873	1	0.00114548	94.0594	8	0.0015255
Marine_refseq	399	Neorhizobium_galegae	6455027	4551	8	0.00175786	93.5887	11.875	0.0119907
Marine_refseq	405	Methylobacillus_flagellatus	2971517	691	1	0.00144718	98.0198	42	0.00343259
Marine_refseq	406	Methylobacillus_glycogenes	3248999	991	1	0.00100908	94.3925	23	0.00329332
Marine_refseq	408	Methylorubrum_extorquens	6123851	1924	14	0.00727651	95.6684	19	0.0186321
Marine_refseq	410	Methylobacterium_organophilum	5319780	1116	2	0.00179211	91.7539	3	0.00325201
Marine_refseq	414	Methylococcus_capsulatus	3304561	1207	7	0.0057995	96.7139	1.28571	0.00683903
Marine_refseq	415	Methylobacter_luteus	5029135	3510	0	0			0
Marine_refseq	421	Methylomonas_methanica	5023270	3623	0	0			0
Marine_refseq	435	Acetobacter_aceti	3634414	2346	3	0.00127877	95.7497	24	0.00396212
Marine_refseq	436	Novacetimonas_hansenii	3549186	1314	0	0			0
Marine_refseq	437	Acidomonas_methanolica	3681251	1111	0	0			0
Marine_refseq	438	Acetobacter_pasteurianus	3403928	2532	0	0			0
Marine_refseq	442	Gluconobacter_oxydans	2882437	874	1	0.00114416	92.0792	3	0.00353867
Marine_refseq	446	Legionella_pneumophila	3409143	37262	6	0.000161022	96.2638	1.66667	0.0128771
Marine_refseq	447	Legionella_bozemanae	4232311	5971	2	0.000334952	94.5545	15.5	0.00482006
Marine_refseq	448	Legionella_erythra	3239140	2145	5	0.002331	92.6389	8	0.00367381
Marine_refseq	449	Legionella_hackeliae	3570857	6633	0	0			0
Marine_refseq	450	Legionella_longbeachae	4149158	6587	1	0.000151814	98.0198	1	0.00245833
Marine_refseq	451	Tatlockia_micdadei	3310028	6769	2	0.000295465	91.5044	3	0.00398788
Marine_refseq	452	Legionella_spiritensis	3348070	6513	421	0.06464	98.4866	36.6081	0.686814
Marine_refseq	453	Legionella_feeleii	3534250	5113	8	0.00156464	95.0347	21	0.0161845
Marine_refseq	454	Legionella_israelensis	3111640	9162	235	0.0256494	95.8589	23.4	0.498194
Marine_refseq	455	Legionella_jamestowniensis	3409712	7941	4	0.000503715	94.3249	19.75	0.0107047
Marine_refseq	456	Legionella_jordanis	3133723	5252	1	0.000190404	99	42	0.003223
Marine_refseq	458	Legionella_rubrilucens	3186910	1824	0	0			0
Marine_refseq	460	Legionella_steigerwaltii	3998094	5931	4	0.000674423	92.0873	7.5	0.00430205
Marine_refseq	463	Fluoribacter_dumoffii	3909670	6070	0	0			0
Marine_refseq	464	Fluoribacter_gormanii	3872652	5220	1	0.000191571	90.099	3	0.00263385
Marine_refseq	466	Legionella_maceachernii	3661065	5236	2	0.000381971	99	1	0.00554483
Marine_refseq	470	Acinetobacter_baumannii	3999136	39850	273	0.00685069	96.7132	18.2418	0.20902
Marine_refseq	471	Acinetobacter_calcoaceticus	3945682	13968	2	0.000143184	97.926	1	0.00501814
Marine_refseq	476	Moraxella_bovis	2807142	699	1	0.00143062	98.0198	1	0.00363359
Marine_refseq	477	Moraxella_lacunata	3178664	1156	0	0			0
Marine_refseq	478	Moraxella_nonliquefaciens	2343743	2806	100	0.0356379	99.1239	39.17	0.400385
Marine_refseq	480	Moraxella_catarrhalis	1994386	7763	5	0.000644081	98.3079	25.6	0.0244687
Marine_refseq	483	Neisseria_cinerea	1832904	610	0	0			0
Marine_refseq	486	Neisseria_lactamica	2200224	505	0	0			0
Marine_refseq	487	Neisseria_meningitidis	2181327	5890	12	0.00203735	96.4906	1.08333	0.0338785
Marine_refseq	488	Neisseria_mucosa	2654294	972	4	0.00411523	95.5446	6.25	0.0154843
Marine_refseq	489	Neisseria_polysaccharea	2029584	211	0	0			0
Marine_refseq	490	Neisseria_sicca	2566407	2146	10	0.00465983	95.4286	23.6	0.0384974
Marine_refseq	492	Neisseria_animalis	2236930	499	2	0.00400802	96.4286	1	0.00379985
Marine_refseq	493	Neisseria_canis	2569389	1478	0	0			0
Marine_refseq	495	Neisseria_elongata	2406516	1049	9	0.0085796	97.2846	35.3333	0.0310823
Marine_refseq	498	Psychrobacter_immobilis	3243066	34461	963	0.0279446	96.8104	28.5909	0.482599
Marine_refseq	500	Thermomicrobium_roseum	2920744	695	1	0.00143885	93.1034	3	0.00202003
Marine_refseq	502	Kingella_denitrificans	2220058	889	3	0.00337458	93.6884	15.3333	0.0111709
Marine_refseq	504	Kingella_kingae	2006553	1751	0	0			0
Marine_refseq	505	Kingella_oralis	2420532	852	27	0.0316901	98.9898	38.4074	0.102457
Marine_refseq	511	Alcaligenes_faecalis	4248684	2818	8	0.00283889	94.0812	18.625	0.0112976
Marine_refseq	518	Bordetella_bronchiseptica	5199761	2916	1	0.000342936	92.8571	8	0.0010962
Marine_refseq	521	Bordetella_avium	3721798	789	0	0			0
Marine_refseq	525	Acidocella_facilis	3403931	463	6	0.012959	97.4075	34.8333	0.0162165
Marine_refseq	529	Brucella_anthropi	4858647	2367	87	0.0367554	98.2408	37.7586	0.168174
Marine_refseq	531	Polaribacter_irgensii	2763458	10315	26	0.0025206	95.6441	2.76923	0.0351009
Marine_refseq	533	Beijerinckia_indica	4418616	1521	0	0			0
Marine_refseq	536	Chromobacterium_violaceum	4808040	1473	0	0			0
Marine_refseq	537	Iodobacter_fluviatilis	5098455	3096	0	0			0
Marine_refseq	539	Eikenella_corrodens	2192577	1342	1	0.000745156	92.5	8	0.00369428
Marine_refseq	542	Zymomonas_mobilis	2163236	12618	2	0.000158504	92.0446	5.5	0.00915295
Marine_refseq	545	Citrobacter_koseri	4735357	1137	1	0.000879507	99.0385	42	0.00221736
Marine_refseq	546	Citrobacter_freundii	5171093	7402	60	0.00810592	97.5411	35.55	0.0931911
Marine_refseq	548	Klebsiella_aerogenes	5281764	4565	0	0			0
Marine_refseq	549	Pantoea_agglomerans	4692018	4633	1	0.000215843	96.0784	24	0.00219522
Marine_refseq	550	Enterobacter_cloacae	5023439	4688	1	0.000213311	92.0792	3	0.00203048
Marine_refseq	552	Erwinia_amylovora	3832351	1664	7	0.00420673	96.5232	1.14286	0.0183438
Marine_refseq	553	Pantoea_ananatis	4867131	6687	14	0.00209361	97.1439	4.07143	0.0136014
Marine_refseq	554	Pectobacterium_carotovorum	4892225	25838	34	0.00131589	96.6196	1	0.00645923
Marine_refseq	556	Dickeya_chrysanthemi	4813854	867	1	0.0011534	88.1188	2	0.00211888
Marine_refseq	562	Escherichia_coli	5594605	109398	2977	0.0272126	96.9115	31.8025	0.385479
Marine_refseq	564	Escherichia_fergusonii	4645928	1336	39	0.0291916	99.216	1	0.0193718
Marine_refseq	565	Atlantibacter_hermannii	4554875	1584	4	0.00252525	99.7525	42	0.00794753
Marine_refseq	566	Pseudescherichia_vulneris	4398823	699	4	0.00572246	98.8083	42	0.00534234
Marine_refseq	569	Hafnia_alvei	4772047	3688	0	0			0
Marine_refseq	571	Klebsiella_oxytoca	5857964	2830	0	0			0
Marine_refseq	573	Klebsiella_pneumoniae	5682322	31940	1954	0.0611772	98.6877	1.85977	0.122274
Marine_refseq	575	Raoultella_planticola	5823931	1835	1	0.000544959	99.0099	42	0.00175139
Marine_refseq	577	Raoultella_terrigena	5598454	1273	0	0			0
Marine_refseq	580	Kluyvera_cryocrescens	4765584	568	0	0			0
Marine_refseq	582	Morganella_morganii	3889903	10098	5	0.000495148	96.5912	28.4	0.0121597
Marine_refseq	584	Proteus_mirabilis	4099895	9028	26	0.00287993	95.7105	24.1538	0.037318
Marine_refseq	585	Proteus_vulgaris	4035522	7018	0	0			0
Marine_refseq	587	Providencia_rettgeri	4641942	11250	6	0.000533333	97.8548	1	0.0104913
Marine_refseq	588	Providencia_stuartii	4487528	12749	0	0			0
Marine_refseq	614	Serratia_liquefaciens	5282719	1136	0	0			0
Marine_refseq	615	Serratia_marcescens	5160776	7086	5	0.000705617	95.9234	22	0.00891339
Marine_refseq	623	Shigella_flexneri	4828820	603	3	0.00497512	97.2354	14.6667	0.00546717
Marine_refseq	624	Shigella_sonnei	4994001	339	9	0.0265487	97.9584	33.1111	0.0138967
Marine_refseq	628	Xenorhabdus_nematophila	4587917	2101	0	0			0
Marine_refseq	630	Yersinia_enterocolitica	4625880	6194	2	0.000322893	96.2321	4.5	0.00456129
Marine_refseq	631	Yersinia_intermedia	4928910	1569	1	0.000637349	98.0198	1	0.00206942
Marine_refseq	633	Yersinia_pseudotuberculosis	4610200	854	3	0.00351288	96.6997	1.33333	0.00446835
Marine_refseq	636	Edwardsiella_tarda	3802888	1582	0	0			0
Marine_refseq	638	Arsenophonus_nasoniae	4987107	3259	0	0			0
Marine_refseq	644	Aeromonas_hydrophila	4744448	5594	3	0.000536289	94.0075	1.33333	0.00507962
Marine_refseq	645	Aeromonas_salmonicida	4954811	4412	7	0.00158658	95.1782	2.28571	0.00924354
Marine_refseq	646	Aeromonas_sobria	4683669	1328	0	0			0
Marine_refseq	648	Aeromonas_caviae	4586140	4464	0	0			0
Marine_refseq	650	Aeromonas_jandaei	4551079	2437	0	0			0
Marine_refseq	651	Aeromonas_media	4531033	1749	7	0.00400229	96.902	19.1429	0.0137938
Marine_refseq	652	Aeromonas_schubertii	4140228	796	0	0			0
Marine_refseq	654	Aeromonas_veronii	4561870	8651	1	0.000115594	94.7368	1	0.0016879
Marine_refseq	656	Aeromonas_allosaccharophila	4630407	1008	0	0			0
Marine_refseq	659	Photobacterium_phosphoreum	4550107	8138	13	0.00159744	95.8806	23.1538	0.0260873
Marine_refseq	661	Photobacterium_angustum	4882508	7765	794	0.102254	97.5141	34.5806	1.45298
Marine_refseq	663	Vibrio_alginolyticus	5150420	8337	456	0.0546959	97.9455	37.0877	0.727785
Marine_refseq	666	Vibrio_cholerae	4138412	14229	36	0.00253004	96.3949	25.4444	0.0443165
Marine_refseq	668	Aliivibrio_fischeri	4273718	18464	53	0.00287045	97.2056	33.9245	0.107798
Marine_refseq	669	Vibrio_harveyi	5869008	3560	27	0.00758427	96.0834	25.963	0.0427159
Marine_refseq	670	Vibrio_parahaemolyticus	5165770	63780	211	0.00330825	96.9023	2.88626	0.0811883
Marine_refseq	672	Vibrio_vulnificus	5007160	15540	27	0.00173745	96.212	3.14815	0.0476518
Marine_refseq	673	Grimontia_hollisae	3998439	2017	3	0.00148736	93.3955	9.66667	0.00700273
Marine_refseq	674	Vibrio_mimicus	4443087	4838	0	0			0
Marine_refseq	675	Vibrio_cincinnatiensis	3800816	6538	3	0.000458856	95.2843	16	0.00794566
Marine_refseq	676	Vibrio_fluvialis	4827733	5130	12	0.00233918	97.5151	37	0.0233236
Marine_refseq	680	Vibrio_campbellii	5425575	8013	1449	0.180831	97.1509	33.5459	2.23256
Marine_refseq	685	Vibrio_diazotrophicus	4820957	3242	0	0			0
Marine_refseq	687	Vibrio_gazogenes	4712479	6867	3	0.000436872	95.2026	27.6667	0.00445625
Marine_refseq	688	Aliivibrio_logei	4638003	732	2	0.00273224	95.5446	24	0.00439844
Marine_refseq	689	Vibrio_mediterranei	5651202	3758	31	0.00824907	97.0698	32.1935	0.0550325
Marine_refseq	691	Vibrio_natriegens	5175153	2852	2	0.000701262	97.1865	1	0.00314967
Marine_refseq	693	Vibrio_nereis	4085582	1322	2	0.00151286	93.5644	8	0.00499317
Marine_refseq	703	Plesiomonas_shigelloides	3860786	3316	11	0.00331725	94.8287	17.8182	0.0127694
Marine_refseq	714	Aggregatibacter_actinomycetemcomitans	2109143	4545	0	0			0
Marine_refseq	715	Actinobacillus_pleuropneumoniae	2318657	1659	1	0.000602773	94.7368	1	0.00250145
Marine_refseq	716	Actinobacillus_suis	2501598	835	0	0			0
Marine_refseq	717	Actinobacillus_capsulatus	2621135	1065	0	0			0
Marine_refseq	718	Actinobacillus_equuli	2451991	621	0	0			0
Marine_refseq	722	Actinobacillus_seminis	2467403	1872	0	0			0
Marine_refseq	723	Actinobacillus_ureae	2492689	883	0	0			0
Marine_refseq	726	Haemophilus_haemolyticus	1934644	11937	23	0.00192678	96.524	28.3043	0.104154
Marine_refseq	727	Haemophilus_influenzae	1890662	9220	5	0.000542299	96.2485	10.2	0.0211566
Marine_refseq	728	Avibacterium_paragallinarum	2521134	3880	1	0.000257732	96.8254	1	0.00253854
Marine_refseq	729	Haemophilus_parainfluenzae	2141704	10957	120	0.0109519	96.7746	30.0333	0.498295
Marine_refseq	730	#NAME?	1589620	4371	0	0			0
Marine_refseq	731	Histophilus_somni	2263857	9015	0	0			0
Marine_refseq	732	Aggregatibacter_aphrophilus	2337153	2570	2	0.00077821	94.0394	4	0.00522003
Marine_refseq	733	Canicola_haemoglobinophilus	2436406	4154	2	0.000481464	97.1014	33	0.00693645
Marine_refseq	734	Haemophilus_paracuniculus	2047249	1025	0	0			0
Marine_refseq	735	Haemophilus_parahaemolyticus	2093459	3206	6	0.00187149	98.5577	39	0.0300937
Marine_refseq	736	Haemophilus_paraphrohaemolyticus	2138467	1488	27	0.0181452	97.3249	15.2222	0.0867444
Marine_refseq	738	Glaesserella_parasuis	2313850	5577	5	0.000896539	97.211	1	0.0169847
Marine_refseq	739	Aggregatibacter_segnis	2022832	2424	4	0.00165017	95.4668	23.75	0.0207135
Marine_refseq	747	Pasteurella_multocida	2335516	9941	2	0.000201187	93.672	2	0.00736454
Marine_refseq	750	Gallibacterium_anatis	2408630	5490	2	0.000364299	97.0198	32	0.00456691
Marine_refseq	751	Avibacterium_avium	2205360	627	0	0			0
Marine_refseq	752	Pasteurella_bettyae	2253160	1912	0	0			0
Marine_refseq	753	Pasteurella_canis	2219635	1957	0	0			0
Marine_refseq	754	Pasteurella_dagmatis	2287213	447	0	0			0
Marine_refseq	755	Avibacterium_gallinarum	2342758	452	0	0			0
Marine_refseq	756	Pasteurella_langaaensis	1989693	1736	0	0			0
Marine_refseq	758	Rodentibacter_pneumotropicus	2434546	2882	0	0			0
Marine_refseq	761	Pasteurella_testudinis	3029577	867	0	0			0
Marine_refseq	769	Anaplasma_centrale	1206806	597	0	0			0
Marine_refseq	770	Anaplasma_marginale	1202435	1723	3	0.00174115	94.1363	3	0.00923127
Marine_refseq	774	Bartonella_bacilliformis	1445021	19128	0	0			0
Marine_refseq	777	Coxiella_burnetii	2032807	5102	64	0.0125441	94.2734	16.5156	0.091991
Marine_refseq	779	Ehrlichia_ruminantium	1516355	42920	3	6.98975e-05	93.1939	11.3333	0.0118706
Marine_refseq	781	Rickettsia_conorii	1268755	3661	0	0			0
Marine_refseq	782	Rickettsia_prowazekii	1109804	8067	1	0.000123962	97.0297	40	0.00919081
Marine_refseq	784	Orientia_tsutsugamushi	2078193	29557	4	0.000135332	93.1234	8	0.0154461
Marine_refseq	785	Rickettsia_typhi	1111496	6242	4	0.00064082	92.6341	8	0.014575
Marine_refseq	786	Rickettsia_akari	1231060	2267	2	0.000882223	96.3872	32	0.0160025
Marine_refseq	787	Rickettsia_australis	1323280	2459	0	0			0
Marine_refseq	788	Rickettsia_canadensis	1150228	6578	3	0.000456066	93.5634	11.3333	0.0222565
Marine_refseq	803	Bartonella_quintana	1588683	6719	2	0.000297663	92.6667	5.5	0.00478384
Marine_refseq	807	Bartonella_elizabethae	2018538	1059	0	0			0
Marine_refseq	813	Chlamydia_trachomatis	1042519	1407	1	0.000710732	100	42	0.004892
Marine_refseq	817	Bacteroides_fragilis	5241700	6067	11	0.00181309	97.3062	4.72727	0.0109506
Marine_refseq	818	Bacteroides_thetaiotaomicron	6304193	5180	1	0.00019305	96.0396	1	0.00161797
Marine_refseq	820	Bacteroides_uniformis	4920161	4404	3	0.000681199	98.1718	28.3333	0.00597541
Marine_refseq	821	Phocaeicola_vulgatus	5163189	3081	0	0			0
Marine_refseq	823	Parabacteroides_distasonis	5348976	3754	1	0.000266383	98.3051	1	0.00112171
Marine_refseq	824	Campylobacter_gracilis	2281652	766	18	0.0234987	95.5217	23.3889	0.0668375
Marine_refseq	826	Sebaldella_termitidis	4486650	4470	0	0			0
Marine_refseq	827	Campylobacter_ureolyticus	1820334	20064	9	0.000448565	95.9711	23.7778	0.0424647
Marine_refseq	831	Butyrivibrio_fibrisolvens	4934347	6692	0	0			0
Marine_refseq	833	Fibrobacter_succinogenes	3843004	843	0	0			0
Marine_refseq	837	Porphyromonas_gingivalis	2354886	1367	2	0.00146306	96.0959	25	0.0081108
Marine_refseq	839	Prevotella_ruminicola	3619559	3078	0	0			0
Marine_refseq	844	Wolinella_succinogenes	2150449	1147	1	0.00087184	96.0396	1	0.0047432
Marine_refseq	847	Oxalobacter_formigenes	2468871	2942	1	0.000339905	97.0297	1	0.00413144
Marine_refseq	849	Fusobacterium_gonidiaformans	1678881	914	0	0			0
Marine_refseq	850	Fusobacterium_mortiferum	2716766	12716	0	0			0
Marine_refseq	851	Fusobacterium_nucleatum	2180101	83610	6	7.17618e-05	95.8176	27.3333	0.0259621
Marine_refseq	852	Fusobacterium_perfoetens	2103008	18379	1	5.44099e-05	90.7407	3	0.0026153
Marine_refseq	853	Faecalibacterium_prausnitzii	3127383	7898	1	0.000126614	98.0198	42	0.00326151
Marine_refseq	854	Fusobacterium_russii	1941804	7033	0	0			0
Marine_refseq	856	Fusobacterium_varium	3346458	3941	0	0			0
Marine_refseq	858	Fusobacterium_necrogenes	2015236	5323	0	0			0
Marine_refseq	859	Fusobacterium_necrophorum	2288480	7371	2	0.000271334	98.2384	1	0.00511256
Marine_refseq	860	Fusobacterium_periodonticum	2615003	6517	1	0.000153445	95.1923	24	0.00401529
Marine_refseq	861	Fusobacterium_ulcerans	3537675	15077	0	0			0
Marine_refseq	863	Syntrophomonas_wolfei	2936195	2802	0	0			0
Marine_refseq	865	Pectinatus_frisingensis	2881049	5539	0	0			0
Marine_refseq	870	Dichelobacter_nodosus	1389350	2856	3	0.00105042	98.1282	8.66667	0.0193616
Marine_refseq	873	Desulfocurvibacter_africanus	4200534	1813	0	0			0
Marine_refseq	876	Desulfovibrio_desulfuricans	3554892	2028	1	0.000493097	92.2222	3	0.00255985
Marine_refseq	878	Solidesulfovibrio_fructosivorans	4673595	785	2	0.00254777	93.1366	8	0.00440774
Marine_refseq	879	Megalodesulfovibrio_gigas	3796022	739	1	0.00135318	93.0693	8	0.00268702
Marine_refseq	880	Maridesulfovibrio_salexigens	4289847	1387	0	0			0
Marine_refseq	886	Thermodesulfobacterium_thermophilum	1787382	1761	0	0			0
Marine_refseq	889	Paucidesulfovibrio_longus	3701832	781	0	0			0
Marine_refseq	891	Desulfuromonas_acetoxidans	3828328	2340	5	0.00213675	96.9906	9.2	0.00449282
Marine_refseq	894	Desulfobulbus_propionicus	3851869	1533	0	0			0
Marine_refseq	897	Desulfococcus_multivorans	4455976	2657	8	0.00301091	96.3279	22	0.0157766
Marine_refseq	899	Desulfomicrobium_baculatum	3942657	459	0	0			0
Marine_refseq	901	Desulfovibrio_piger	2582155	1108	1	0.000902527	92.7273	3	0.00216873
Marine_refseq	905	Acidaminococcus_fermentans	2329769	988	0	0			0
Marine_refseq	907	Megasphaera_elsdenii	2478942	956	0	0			0
Marine_refseq	912	Nitrobacter_hamburgensis	5011522	701	7	0.00998573	94.9521	20.8571	0.00995705
Marine_refseq	913	Nitrobacter_winogradskyi	3402093	1644	16	0.00973236	93.7457	11.875	0.0299815
Marine_refseq	915	Nitrosomonas_europaea	2812094	2347	3	0.00127823	96.754	30	0.0100637
Marine_refseq	916	Nitrosomonas_eutropha	2781824	3801	17	0.00447251	96.9587	1.41176	0.0225032
Marine_refseq	917	Nitrosomonas_marina	3496909	6568	6	0.00091352	96.3597	29.3333	0.0174154
Marine_refseq	920	Acidithiobacillus_ferrooxidans	2982397	1044	0	0			0
Marine_refseq	921	Starkeya_novella	4765023	906	0	0			0
Marine_refseq	923	Guyparkeria_hydrothermalis	2433989	749	0	0			0
Marine_refseq	926	Thiomonas_intermedia	3343428	727	0	0			0
Marine_refseq	927	Halothiobacillus_neapolitanus	2582886	1523	5	0.00328299	94.8399	18.2	0.0128151
Marine_refseq	929	Thermithiobacillus_tepidarius	2958498	880	21	0.0238636	97.7999	3.14286	0.0260267
Marine_refseq	930	Acidithiobacillus_thiooxidans	3415726	5087	0	0			0
Marine_refseq	931	Thiobacillus_thioparus	3201518	756	2	0.0026455	93.5575	15.5	0.00546616
Marine_refseq	934	Thiomicrospira_pelophila	2108215	3387	0	0			0
Marine_refseq	940	Hydrogenobacter_thermophilus	1742932	1221	0	0			0
Marine_refseq	944	Ehrlichia_canis	1315030	9877	13	0.00131619	92.7927	10.4615	0.0325468
Marine_refseq	945	Ehrlichia_chaffeensis	1176248	10536	2	0.000189825	92.7056	3	0.0095218
Marine_refseq	948	Anaplasma_phagocytophilum	1479407	9039	1	0.000110632	94.0594	23	0.00689465
Marine_refseq	949	Anaplasma_platys	1196811	1591	12	0.00754243	93.6469	11.4167	0.0449528
Marine_refseq	950	Neorickettsia_risticii	879977	2071	0	0			0
Marine_refseq	951	Neorickettsia_sennetsu	859006	1871	0	0			0
Marine_refseq	954	Francisella_persica	1516676	6136	10	0.00162973	94.484	10.4	0.0613183
Marine_refseq	955	Wolbachia_pipientis	1267781	19382	17	0.000877102	92.7618	4.76471	0.0350218
Marine_refseq	959	Bdellovibrio_bacteriovorus	3782950	7718	0	0			0
Marine_refseq	960	Bacteriovorax_stolpii	3810309	4879	26	0.00532896	96.4634	3.46154	0.0347216
Marine_refseq	964	Herbaspirillum_seropedicae	5509723	840	24	0.0285714	95.5664	24.8333	0.0368258
Marine_refseq	966	Oceanospirillum_linum	3654430	2357	9	0.00381841	94.3839	17.2222	0.0146398
Marine_refseq	971	Selenomonas_ruminantium	3387070	3902	0	0			0
Marine_refseq	979	Cellulophaga_lytica	3765936	2240	8	0.00357143	97.3272	32.75	0.0181097
Marine_refseq	982	Saccharicrinis_fermentans	5982061	6447	1	0.000155111	99.0099	1	0.0017051
Marine_refseq	983	Flavobacterium_flevense	4230539	6224	9	0.00144602	95.4384	24.6667	0.0190992
Marine_refseq	984	Pedobacter_heparinus	5167383	576	0	0			0
Marine_refseq	985	Cytophaga_hutchinsonii	4433218	3991	0	0			0
Marine_refseq	986	Flavobacterium_johnsoniae	6096872	12743	1	7.84745e-05	93.5897	8	0.00129575
Marine_refseq	987	Aquimarina_latercula	6245252	2612	141	0.0539816	97.1416	32.6454	0.0841119
Marine_refseq	988	Leeuwenhoekiella_marinoflava	4747764	15687	1567	0.0998916	96.9301	27.8271	1.33682
Marine_refseq	989	Marinilabilia_salmonicolor	4982627	7815	10	0.00127959	95.0431	24.4	0.00212739
Marine_refseq	990	Breznakibacter_xylanolyticus	4380952	2130	0	0			0
Marine_refseq	991	Flavobacterium_hydatis	5902573	6825	3	0.00043956	94.8042	22.6667	0.00447263
Marine_refseq	995	Solitalea_canadensis	5202069	6168	0	0			0
Marine_refseq	996	Flavobacterium_columnare	3221278	9859	0	0			0
Marine_refseq	997	Eisenibacter_elegans	4030713	1552	0	0			0
Marine_refseq	998	Flexibacter_flexilis	4249974	2798	3	0.00107219	94.4786	17	0.00480003
Marine_refseq	999	Bernardetia_litoralis	4919337	13456	13	0.000966112	93.3808	9.76923	0.015185
Marine_refseq	1002	Hugenholtzia_roseola	4254862	2147	48	0.0223568	95.2541	24.2708	0.00658071
Marine_refseq	1003	Thermoflexibacter_ruber	5504183	5052	0	0			0
Marine_refseq	1004	Chitinophaga_sancti	8421768	1752	0	0			0
Marine_refseq	1006	Marivirga_tractuosa	4516490	10769	46	0.00427152	96.7675	28.3696	0.0902692
Marine_refseq	1008	Saprospira_grandis	4400185	3186	6	0.00188324	97.1028	2	0.0106132
Marine_refseq	1010	Sphingobacterium_mizutaii	4653048	3535	1	0.000282885	100	42	0.00214913
Marine_refseq	1014	Weeksella_virosa	2287133	457	6	0.0131291	95.2145	21	0.0177515
Marine_refseq	1015	Bergeyella_zoohelcum	2331468	5967	3	0.000502765	95.7043	23	0.00986503
Marine_refseq	1017	Capnocytophaga_gingivalis	2838633	4249	8	0.0018828	97.6305	36.625	0.0265269
Marine_refseq	1018	Capnocytophaga_ochracea	2612925	2151	2	0.0009298	97.5148	12.5	0.0077308
Marine_refseq	1019	Capnocytophaga_sputigena	2855148	4809	4	0.000831774	97.589	36.75	0.0138697
Marine_refseq	1022	Beggiatoa_alba	4265146	8508	139	0.0163376	95.8889	26.4388	0.0107148
Marine_refseq	1026	Marinoscillum_furvescens	5966820	6061	115	0.0189738	96.6376	31.887	0.0317087
Marine_refseq	1027	Microscilla_marina	9771226	8125	180	0.0221538	98.2152	1.12778	0.00796215
Marine_refseq	1028	Marivirga_sericea	4741005	8556	26	0.0030388	96.5407	27.5385	0.0457287
Marine_refseq	1031	Thiothrix_nivea	4691711	1770	2	0.00112994	96.5347	1	0.00228062
Marine_refseq	1034	Afipia_clevelandensis	4399548	1078	58	0.0538033	94.7323	20.7414	0.112875
Marine_refseq	1035	Afipia_felis	4195257	1017	4	0.00393314	93.9465	3.75	0.00972527
Marine_refseq	1044	Erythrobacter_longus	3602162	7433	2667	0.358805	98.2101	37.934	0.767511
Marine_refseq	1049	Allochromatium_vinosum	3669074	685	2	0.00291971	93.5347	12.5	0.00553273
Marine_refseq	1050	Thermochromatium_tepidum	2958290	1190	1	0.000840336	92.5926	8	0.00185918
Marine_refseq	1052	Halorhodospira_halochloris	2834560	2808	0	0			0
Marine_refseq	1053	Halorhodospira_halophila	2678452	982	0	0			0
Marine_refseq	1054	Ectothiorhodospira_shaposhnikovii	3788226	1628	307	0.188575	97.7078	34.1954	0.101631
Marine_refseq	1057	Thiococcus_pfennigii	4076754	1665	15	0.00900901	94.9151	21.6667	0.0265898
Marine_refseq	1058	Thiocapsa_roseopersicina	5386125	805	0	0			0
Marine_refseq	1061	Rhodobacter_capsulatus	3871920	3304	9	0.00272397	93.888	13.6667	0.0199126
Marine_refseq	1063	Cereibacter_sphaeroides	4602977	4516	11	0.00243578	94.8975	14.3636	0.0179232
Marine_refseq	1066	Rhodocyclus_tenuis	3854478	932	2	0.00214592	91.9948	5.5	0.00326893
Marine_refseq	1067	Rhodocyclus_purpureus	3617966	766	1	0.00130548	94.2308	24	0.00146491
Marine_refseq	1069	Rhodomicrobium_vannielii	4014469	816	0	0			0
Marine_refseq	1071	Rhodopila_globiformis	7248147	2019	0	0			0
Marine_refseq	1074	Rhodoblastus_acidophilus	4711496	2255	1	0.000443459	94	23	0.00214369
Marine_refseq	1075	Fuscovulum_blasticum	3706095	1448	8	0.00552486	93.3838	9.75	0.0135992
Marine_refseq	1076	Rhodopseudomonas_palustris	5457289	7154	5	0.00069891	92.6574	6	0.00560718
Marine_refseq	1079	Blastochloris_viridis	3724841	963	1	0.00103842	93.0693	3	0.00273837
Marine_refseq	1080	Afifella_marina	3963421	622	3	0.00482315	94.6931	16	0.00497045
Marine_refseq	1082	Magnetospirillum_fulvum	3805060	2685	2	0.000744879	94.4523	8.5	0.00431005
Marine_refseq	1083	Magnetospirillum_molischianum	3805617	1622	2	0.00123305	91.5952	3	0.00507145
Marine_refseq	1084	Pararhodospirillum_photometricum	3876289	2922	16	0.0054757	93.8655	5.5625	0.0191678
Marine_refseq	1085	Rhodospirillum_rubrum	4406557	3163	8	0.00252924	94.1465	10.875	0.0172016
Marine_refseq	1086	Rhodothalassium_salexigens	3358756	2563	51	0.0198986	94.1838	16.6667	0.0774989
Marine_refseq	1087	Rhodovibrio_salinarum	4176524	1358	10	0.00736377	93.9781	14.1	0.0112534
Marine_refseq	1088	Rhodovibrio_sodomensis	5750741	1962	10	0.00509684	94.0945	14	0.013407
Marine_refseq	1092	Chlorobium_limicola	2763181	2226	7	0.00314465	95.9848	23.4286	0.0223655
Marine_refseq	1094	Chlorobium_phaeovibrioides	2094018	1498	6	0.00400534	93.7426	13.6667	0.0161412
Marine_refseq	1096	Chlorobium_phaeobacteroides	3133902	1889	3	0.00158814	92.3597	4.33333	0.00647755
Marine_refseq	1097	Chlorobaculum_tepidum	2154946	401	1	0.00249377	92	3	0.00236665
Marine_refseq	1098	Prosthecochloris_vibrioformis	2305678	282	52	0.184397	95.6914	24.7885	0.111637
Marine_refseq	1100	Pelodictyon_luteolum	2364842	808	0	0			0
Marine_refseq	1108	Chloroflexus_aurantiacus	5258541	963	1	0.00103842	93.0693	2	0.0019397
Marine_refseq	1112	Erythrobacter_neustonensis	3090363	2175	94	0.0432184	93.9976	14.5745	0.164123
Marine_refseq	1122	Aphanothece_sacrum	4493232	4115	4	0.000972053	97.2772	1	0.00790077
Marine_refseq	1124	Chlorogloeopsis_fritschii	7751745	3923	24	0.00611777	93.6624	8.95833	0.00260586
Marine_refseq	1126	Microcystis_aeruginosa	5263219	9637	49	0.00508457	92.9842	11.102	0.0333826
Marine_refseq	1160	Planktothrix_agardhii	4904228	4220	4	0.000947867	96.3731	2.5	0.00681045
Marine_refseq	1164	Trichormus_azollae	5486145	3356	0	0			0
Marine_refseq	1166	Dolichospermum_flos-aquae	5220684	1216	0	0			0
Marine_refseq	1176	Aphanizomenon_flos-aquae	4347270	1176	0	0			0
Marine_refseq	1178	Nostoc_commune	8198700	4083	1	0.000244918	98.0198	42	0.0012441
Marine_refseq	1179	Desmonostoc_muscorum	9635616	2268	0	0			0
Marine_refseq	1202	Leptolyngbya_ectocarpi	6774485	2054	5	0.00243427	90.0967	2	0.00323272
Marine_refseq	1219	Prochlorococcus_marinus	1704176	81382698	1437109	0.0176587	94.2737	15.1444	64.8861
Marine_refseq	1223	Prochlorothrix_hollandica	5646343	1690	11	0.00650888	93.7934	8	0.0113348
Marine_refseq	1229	Nitrosococcus_oceani	3522111	2825	20	0.00707965	95.5273	4.5	0.0346383
Marine_refseq	1231	Nitrosospira_multiformis	3234309	4136	0	0			0
Marine_refseq	1233	Nitrosovibrio_tenuis	3098034	1184	2	0.00168919	92.5743	5.5	0.00329241
Marine_refseq	1238	Piscirickettsia_salmonis	3351503	8911	13	0.00145887	95.6197	14.7692	0.0283455
Marine_refseq	1244	Leuconostoc_gelidum	1893499	3070	0	0			0
Marine_refseq	1245	Leuconostoc_mesenteroides	2075763	4076	4	0.000981354	99.0099	42	0.0179693
Marine_refseq	1246	Leuconostoc_lactis	1791608	1755	4	0.0022792	99.7253	42	0.0223821
Marine_refseq	1247	Oenococcus_oeni	1892074	5744	1	0.000174095	92.8571	3	0.00301257
Marine_refseq	1249	Weissella_paramesenteroides	2007410	2866	1	0.000348918	98.0198	42	0.00508117
Marine_refseq	1251	Leuconostoc_fallax	1660517	2436	0	0			0
Marine_refseq	1252	Leuconostoc_carnosum	1701333	1760	6	0.00340909	97.8217	35.6667	0.0307994
Marine_refseq	1254	Pediococcus_acidilactici	2044083	3340	0	0			0
Marine_refseq	1255	Pediococcus_pentosaceus	1832387	4105	0	0			0
Marine_refseq	1258	Peptoniphilus_asaccharolyticus	2320207	4495	1	0.000222469	98.0392	42	0.00224118
Marine_refseq	1260	Finegoldia_magna	1838801	16004	36	0.00224944	97.1763	32.8056	0.185991
Marine_refseq	1261	Peptostreptococcus_anaerobius	2083092	3922	17	0.00433452	99.0681	41.6471	0.0765689
Marine_refseq	1264	Ruminococcus_albus	4482087	5508	0	0			0
Marine_refseq	1265	Ruminococcus_flavefaciens	3587803	7961	0	0			0
Marine_refseq	1267	Sarcina_ventriculi	2549638	3396	1	0.000294464	92.0792	3	0.00400057
Marine_refseq	1270	Micrococcus_luteus	2495693	2115	124	0.0586288	97.2864	36.1371	0.42397
Marine_refseq	1274	Dermacoccus_nishinomiyaensis	3113642	470	66	0.140426	98.6026	39.5303	0.184607
Marine_refseq	1275	Kocuria_rosea	3953419	1755	62	0.0353276	95.628	25.2419	0.147973
Marine_refseq	1276	Kytococcus_sedentarius	2783568	922	116	0.125813	97.8807	35.9052	0.378579
Marine_refseq	1280	Staphylococcus_aureus	2821361	45199	55	0.00121684	97.4409	9.69091	0.0809538
Marine_refseq	1281	Staphylococcus_carnosus	2571374	2606	0	0			0
Marine_refseq	1282	Staphylococcus_epidermidis	2491058	14925	285	0.0190955	97.7908	35.7895	1.0622
Marine_refseq	1283	Staphylococcus_haemolyticus	2572027	25980	7	0.000269438	97.5162	31.8571	0.0282656
Marine_refseq	1284	Staphylococcus_hyicus	2472129	3644	0	0			0
Marine_refseq	1285	Staphylococcus_intermedius	2891525	1534	0	0			0
Marine_refseq	1286	Staphylococcus_simulans	2682239	4583	0	0			0
Marine_refseq	1288	Staphylococcus_xylosus	2757557	12933	5	0.000386608	98.797	41.6	0.0186397
Marine_refseq	1290	Staphylococcus_hominis	2257431	9228	43	0.00465973	98.3556	36.1395	0.184325
Marine_refseq	1292	Staphylococcus_warneri	2541629	3225	40	0.0124031	98.9846	40.925	0.151163
Marine_refseq	1293	Staphylococcus_gallinarum	2942339	10170	2	0.000196657	95.6731	22.5	0.00703522
Marine_refseq	1294	Staphylococcus_muscae	2095116	2876	0	0			0
Marine_refseq	1296	Mammaliicoccus_sciuri	2811859	17103	2	0.000116939	90.4025	2.5	0.00519229
Marine_refseq	1299	Deinococcus_radiodurans	3279598	374	0	0			0
Marine_refseq	1302	Streptococcus_gordonii	2187618	2984	11	0.00368633	96.6057	31.4545	0.0474946
Marine_refseq	1303	Streptococcus_oralis	1931548	7239	98	0.0135378	95.6877	24.6633	0.354017
Marine_refseq	1304	Streptococcus_salivarius	2210574	4049	14	0.00345764	97.2254	33.9286	0.0561393
Marine_refseq	1305	Streptococcus_sanguinis	2296927	5871	169	0.0287856	97.0771	31.787	0.682172
Marine_refseq	1307	Streptococcus_suis	2170808	23090	0	0			0
Marine_refseq	1308	Streptococcus_thermophilus	1791634	2753	87	0.0316019	98.1693	35.8506	0.364472
Marine_refseq	1309	Streptococcus_mutans	2019345	4221	19	0.0045013	99.2199	34.9474	0.0897321
Marine_refseq	1310	Streptococcus_sobrinus	2198571	1294	1	0.000772798	100	42	0.00477583
Marine_refseq	1311	Streptococcus_agalactiae	2079123	4614	1	0.000216732	98.0198	42	0.00490591
Marine_refseq	1313	Streptococcus_pneumoniae	2110968	8029	15	0.00186823	95.4885	16.5333	0.0567986
Marine_refseq	1314	Streptococcus_pyogenes	1746380	6486	2	0.000308356	98.3871	21.5	0.00944812
Marine_refseq	1318	Streptococcus_parasanguinis	2153652	4145	13	0.00313631	95.6089	19.7692	0.05493
Marine_refseq	1322	Blautia_hansenii	3065949	3457	1	0.000289268	98.0769	42	0.00342471
Marine_refseq	1323	Faecalicoccus_pleomorphus	2055154	4207	0	0			0
Marine_refseq	1326	Streptococcus_acidominimus	2445682	1230	0	0			0
Marine_refseq	1328	Streptococcus_anginosus	1953654	2033	0	0			0
Marine_refseq	1329	Streptococcus_canis	2084744	1757	0	0			0
Marine_refseq	1333	Streptococcus_criceti	2431956	394	0	0			0
Marine_refseq	1334	Streptococcus_dysgalactiae	2174327	3026	0	0			0
Marine_refseq	1335	Streptococcus_equinus	1797051	6778	0	0			0
Marine_refseq	1336	Streptococcus_equi	2154778	4828	0	0			0
Marine_refseq	1337	Streptococcus_hyointestinalis	2553358	1194	0	0			0
Marine_refseq	1338	Streptococcus_intermedius	1932951	2359	15	0.00635863	98.4177	39.3333	0.0766703
Marine_refseq	1339	Streptococcus_macacae	1930691	2185	0	0			0
Marine_refseq	1340	Streptococcus_porcinus	2033046	3457	0	0			0
Marine_refseq	1343	Streptococcus_vestibularis	1950305	601	1	0.00166389	95.0495	23	0.00522995
Marine_refseq	1345	Streptococcus_ferus	1872314	1261	1	0.000793021	98.0198	42	0.0054478
Marine_refseq	1346	Streptococcus_iniae	2086959	3113	0	0			0
Marine_refseq	1348	Streptococcus_parauberis	2164480	2527	0	0			0
Marine_refseq	1349	Streptococcus_uberis	1975601	7245	0	0			0
Marine_refseq	1351	Enterococcus_faecalis	2870381	22515	1	4.44148e-05	98.1481	6	0.00379741
Marine_refseq	1352	Enterococcus_faecium	2919198	25579	26	0.00101646	97.3665	24.9615	0.0708756
Marine_refseq	1353	Enterococcus_gallinarum	3488294	2823	0	0			0
Marine_refseq	1354	Enterococcus_hirae	2845651	5276	0	0			0
Marine_refseq	1355	Enterococcus_columbae	2545099	2163	0	0			0
Marine_refseq	1356	Enterococcus_sulfureus	2301651	1744	0	0			0
Marine_refseq	1358	Lactococcus_lactis	2639081	12785	128	0.0100117	97.0706	31.8438	0.440494
Marine_refseq	1359	Lactococcus_cremoris	2427048	3624	517	0.14266	98.2471	38.9536	1.98406
Marine_refseq	1363	Lactococcus_garvieae	2084337	4379	2	0.000456725	96.5775	33	0.00993122
Marine_refseq	1364	Lactococcus_piscium	2405003	969	2	0.00206398	99.5146	42	0.00681912
Marine_refseq	1365	Lactococcus_plantarum	1977763	1477	0	0			0
Marine_refseq	1366	Lactococcus_raffinolactis	2295672	2542	5	0.00196696	100	42	0.0163786
Marine_refseq	1371	Marinococcus_halophilus	3266249	1464	45	0.0307377	96.2498	24.2444	0.131864
Marine_refseq	1373	Planococcus_citreus	3429284	430	59	0.137209	96.3784	27.322	0.154143
Marine_refseq	1376	Aerococcus_urinae	1974262	3487	0	0			0
Marine_refseq	1377	Aerococcus_viridans	2199877	1976	31	0.0156883	97.4514	32.2903	0.13628
Marine_refseq	1379	Gemella_haemolysans	1905342	13810	25	0.00181028	95.7739	24.2	0.128691
Marine_refseq	1382	Lancefieldella_parvula	1543805	1160	4	0.00344828	96.3904	33	0.0242906
Marine_refseq	1390	Bacillus_amyloliquefaciens	4149690	1211	1	0.000825764	92.0792	3	0.00245801
Marine_refseq	1391	Aneurinibacillus_aneurinilyticus	5313859	1762	0	0			0
Marine_refseq	1392	Bacillus_anthracis	5503926	1862	0	0			0
Marine_refseq	1393	Brevibacillus_brevis	6726998	1900	1	0.000526316	89	2	0.00150141
Marine_refseq	1396	Bacillus_cereus	5836971	55115	1	1.81439e-05	97.1154	1	0.00179888
Marine_refseq	1397	Niallia_circulans	5179558	13215	0	0			0
Marine_refseq	1398	Weizmannia_coagulans	3366995	2916	1	0.000342936	94.2308	23	0.00311851
Marine_refseq	1399	Cytobacillus_firmus	4803910	10222	0	0			0
Marine_refseq	1401	Paenibacillus_lautus	7062432	1698	0	0			0
Marine_refseq	1402	Bacillus_licheniformis	4227253	996	0	0			0
Marine_refseq	1404	Priestia_megaterium	5746548	32515	1	3.0755e-05	97.0297	40	0.00177498
Marine_refseq	1405	Bacillus_mycoides	5697065	10398	0	0			0
Marine_refseq	1406	Paenibacillus_polymyxa	5967522	5802	0	0			0
Marine_refseq	1407	Peribacillus_psychrosaccharolyticus	4681292	3026	0	0			0
Marine_refseq	1408	Bacillus_pumilus	3704641	9585	0	0			0
Marine_refseq	1409	Bacillus_sp._-in-_Bacteria-	3584858	528	0	0			0
Marine_refseq	1411	Alkalihalobacillus_akibai	4740369	6125	0	0			0
Marine_refseq	1413	Evansella_cellulosilytica	4681672	4603	0	0			0
Marine_refseq	1418	Caldalkalibacillus_mannanilyticus	4534596	3365	0	0			0
Marine_refseq	1421	Lysinibacillus_sphaericus	4681723	9127	0	0			0
Marine_refseq	1422	Geobacillus_stearothermophilus	2744723	490	3	0.00612245	99.5169	42	0.00852545
Marine_refseq	1423	Bacillus_subtilis	4215606	7305	2	0.000273785	96.019	1	0.00481544
Marine_refseq	1426	Parageobacillus_thermoglucosidasius	4004923	2264	0	0			0
Marine_refseq	1428	Bacillus_thuringiensis	6260142	25736	6	0.000233136	93.3827	13	0.00354625
Marine_refseq	1445	Alkalihalobacillus_alcalophilus	4210001	3557	1	0.000281136	94.1176	8	0.00123515
Marine_refseq	1449	Amphibacillus_xylanus	2569486	2966	0	0			0
Marine_refseq	1451	Paenibacillus_amylolyticus	7361451	2263	0	0			0
Marine_refseq	1452	Bacillus_atrophaeus	4292910	2209	0	0			0
Marine_refseq	1454	Schinkia_azotoformans	4472104	5855	0	0			0
Marine_refseq	1455	Bacillus_badius	3963196	2515	0	0			0
Marine_refseq	1456	Bacillus_benzoevorans	4701532	2997	0	0			0
Marine_refseq	1458	Metabacillus_fastidiosus	4410645	4904	0	0			0
Marine_refseq	1459	Sporosarcina_globispora	5673948	2168	0	0			0
Marine_refseq	1461	Psychrobacillus_insolitus	3288307	4532	0	0			0
Marine_refseq	1464	Paenibacillus_larvae	4378174	1780	0	0			0
Marine_refseq	1465	Brevibacillus_laterosporus	5400144	7759	1	0.000128883	96.1538	1	0.000981455
Marine_refseq	1467	Lederbergia_lenta	4384366	5587	1	0.000178987	94.9153	23	0.0013685
Marine_refseq	1471	Bacillus_methanolicus	3426513	7591	0	0			0
Marine_refseq	1472	Paenibacillus_pabuli	7329063	1734	0	0			0
Marine_refseq	1473	Virgibacillus_pantothenticus	4761851	1879	0	0			0
Marine_refseq	1474	Sporosarcina_pasteurii	3298318	2431	0	0			0
Marine_refseq	1478	Peribacillus_simplex	5645783	10377	0	0			0
Marine_refseq	1479	Bacillus_smithii	3381292	3099	2	0.000645369	99.5192	42	0.00600362
Marine_refseq	1482	Virgibacillus_halodenitrificans	3917759	6570	0	0			0
Marine_refseq	1488	Clostridium_acetobutylicum	4145581	2191	0	0			0
Marine_refseq	1490	Paraclostridium_bifermentans	3566216	16798	0	0			0
Marine_refseq	1491	Clostridium_botulinum	3903260	54752	3	5.47925e-05	96.0525	1	0.00312559
Marine_refseq	1492	Clostridium_butyricum	4705596	17356	0	0			0
Marine_refseq	1493	Clostridium_cellulovorans	5262222	10147	0	0			0
Marine_refseq	1494	Clostridium_cochlearium	2435419	12242	0	0			0
Marine_refseq	1495	Clostridium_cylindrosporum	2735032	5613	0	0			0
Marine_refseq	1496	Clostridioides_difficile	4095894	44313	10	0.000225667	95.9203	1.2	0.0151371
Marine_refseq	1497	Clostridium_formicaceticum	4586728	5755	0	0			0
Marine_refseq	1498	Hathewaya_histolytica	2740791	6246	0	0			0
Marine_refseq	1499	Ruminiclostridium_josui	4469680	3861	0	0			0
Marine_refseq	1501	Clostridium_pasteurianum	4352852	19952	0	0			0
Marine_refseq	1502	Clostridium_perfringens	3355233	52256	2	3.82731e-05	97.1328	1	0.00315924
Marine_refseq	1503	Gottschalkia_purinilytica	3397304	8484	0	0			0
Marine_refseq	1504	Clostridium_septicum	3404718	9447	0	0			0
Marine_refseq	1505	Paeniclostridium_sordellii	3534945	33139	1	3.01759e-05	92	3	0.00285719
Marine_refseq	1509	Clostridium_sporogenes	4141984	16156	0	0			0
Marine_refseq	1510	Thermoclostridium_stercorarium	2974379	2097	0	0			0
Marine_refseq	1511	Acetoanaerobium_sticklandii	2715461	3363	0	0			0
Marine_refseq	1512	#NAME?	5072209	2229	0	0			0
Marine_refseq	1513	Clostridium_tetani	2873333	13648	0	0			0
Marine_refseq	1515	Acetivibrio_thermocellus	3843301	2621	0	0			0
Marine_refseq	1517	Thermoanaerobacterium_thermosaccharolyticum	2785752	8400	1	0.000119048	94.4444	23	0.00197433
Marine_refseq	1519	Clostridium_tyrobutyricum	3134437	17905	1	5.58503e-05	98.0198	42	0.00325417
Marine_refseq	1520	Clostridium_beijerinckii	5950247	30194	3	9.93575e-05	90.429	2	0.00174783
Marine_refseq	1521	Ruminiclostridium_cellulolyticum	4068724	3515	0	0			0
Marine_refseq	1522	#NAME?	4513882	3275	1	0.000305344	93.9394	8	0.00221539
Marine_refseq	1525	Moorella_thermoacetica	2623349	1631	0	0			0
Marine_refseq	1526	#NAME?	3113820	864	0	0			0
Marine_refseq	1527	Anaerocolumna_aminovalerica	4630141	5651	0	0			0
Marine_refseq	1528	Eubacterium_barkeri	2954329	813	0	0			0
Marine_refseq	1529	Clostridium_cadaveris	3625784	8550	2	0.000233918	92.6344	5.5	0.00341995
Marine_refseq	1531	Enterocloster_clostridioformis	5539047	1665	0	0			0
Marine_refseq	1533	Clostridium_fallax	2747337	7523	0	0			0
Marine_refseq	1534	Clostridium_kluyveri	3955303	11436	0	0			0
Marine_refseq	1537	Romboutsia_lituseburensis	3782458	13759	0	0			0
Marine_refseq	1538	Clostridium_ljungdahlii	4630065	3075	0	0			0
Marine_refseq	1540	Clostridioides_mangenotii	2960967	18236	2	0.000109673	91.1535	3	0.00469441
Marine_refseq	1541	Terrisporobacter_mayombei	4064271	9035	0	0			0
Marine_refseq	1542	Clostridium_novyi	2499078	5941	0	0			0
Marine_refseq	1547	Erysipelatoclostridium_ramosum	3543719	3846	0	0			0
Marine_refseq	1548	Clostridium_scatologenes	5749410	6037	0	0			0
Marine_refseq	1553	Clostridium_tetanomorphum	4475070	10541	0	0			0
Marine_refseq	1556	Gottschalkia_acidurici	3108248	7183	0	0			0
Marine_refseq	1557	Peptoclostridium_litorale	3404633	3374	2	0.000592768	99.005	1	0.00596246
Marine_refseq	1559	Clostridium_tertium	3874184	5715	0	0			0
Marine_refseq	1561	Clostridium_baratii	3211717	18372	0	0			0
Marine_refseq	1563	Desulfosporosinus_orientis	5863081	4058	0	0			0
Marine_refseq	1564	Desulforamulus_ruminis	3969014	1251	0	0			0
Marine_refseq	1565	Desulfotomaculum_nigrificans	2892255	1531	0	0			0
Marine_refseq	1570	Halobacillus_halophilus	4170008	4135	0	0			0
Marine_refseq	1571	Sporosarcina_ureae	3362333	1181	0	0			0
Marine_refseq	1575	Leifsonia_xyli	2686418	732	3	0.00409836	93.7294	6.33333	0.00670037
Marine_refseq	1579	Lactobacillus_acidophilus	1978847	3313	9	0.00271657	96.7406	1	0.018344
Marine_refseq	1580	Levilactobacillus_brevis	2494328	2813	0	0			0
Marine_refseq	1581	Lentilactobacillus_buchneri	2537205	1180	0	0			0
Marine_refseq	1582	Lacticaseibacillus_casei	2952961	731	0	0			0
Marine_refseq	1583	Weissella_confusa	2216758	4734	2	0.000422476	99.505	42	0.00816508
Marine_refseq	1584	Lactobacillus_delbrueckii	1891796	2223	5	0.00224921	97.1712	9.2	0.0172852
Marine_refseq	1587	Lactobacillus_helveticus	2055814	5363	18	0.00335633	98.4516	36.1111	0.0909129
Marine_refseq	1588	Lentilactobacillus_hilgardii	3190226	3780	0	0			0
Marine_refseq	1589	Lactiplantibacillus_pentosus	3671373	1624	2	0.00123153	88.322	2	0.00419462
Marine_refseq	1590	Lactiplantibacillus_plantarum	3223643	6107	1	0.000163747	96.0396	1	0.00316412
Marine_refseq	1596	Lactobacillus_gasseri	1894360	2699	0	0			0
Marine_refseq	1597	Lacticaseibacillus_paracasei	3025352	2039	3	0.00147131	97.4071	14.6667	0.00882542
Marine_refseq	1598	Limosilactobacillus_reuteri	2220255	13088	84	0.00641809	93.6487	9.52381	0.0260781
Marine_refseq	1599	Latilactobacillus_sakei	2018071	2657	15	0.00564546	99.2212	40.8	0.073932
Marine_refseq	1600	Lactobacillus_acetotolerans	1683905	2536	0	0			0
Marine_refseq	1601	Ligilactobacillus_agilis	2162388	4004	0	0			0
Marine_refseq	1602	Companilactobacillus_alimentarius	2401923	2263	1	0.000441891	91.7808	8	0.00308086
Marine_refseq	1604	Lactobacillus_amylovorus	1977087	1919	0	0			0
Marine_refseq	1605	Ligilactobacillus_animalis	1906794	588	3	0.00510204	99.67	42	0.0160479
Marine_refseq	1606	Ligilactobacillus_aviarius	1680526	2051	0	0			0
Marine_refseq	1607	Loigolactobacillus_bifermentans	3274863	981	0	0			0
Marine_refseq	1610	Loigolactobacillus_coryniformis	2951508	2115	1	0.000472813	100	42	0.0035575
Marine_refseq	1612	Companilactobacillus_farciminis	2551839	1640	0	0			0
Marine_refseq	1613	Limosilactobacillus_fermentum	2103331	2167	2	0.000922935	96.5198	32	0.00965136
Marine_refseq	1614	Fructilactobacillus_fructivorans	1332231	1977	0	0			0
Marine_refseq	1615	Weissella_halotolerans	1358385	596	0	0			0
Marine_refseq	1616	Weissella_kandleri	1334438	1361	0	0			0
Marine_refseq	1618	Liquorilactobacillus_mali	2611959	4494	0	0			0
Marine_refseq	1620	Weissella_minor	1768499	1618	0	0			0
Marine_refseq	1622	Ligilactobacillus_murinus	2290452	2243	1	0.000445831	94.5455	23	0.00244493
Marine_refseq	1623	Ligilactobacillus_ruminis	2066652	3028	1	0.000330251	98.6301	42	0.00358067
Marine_refseq	1624	Ligilactobacillus_salivarius	2071255	11880	2	0.00016835	97.0716	20.5	0.00873866
Marine_refseq	1625	Fructilactobacillus_sanfranciscensis	1360847	2555	0	0			0
Marine_refseq	1629	Weissella_viridescens	1593241	2430	18	0.00740741	98.3962	36.7778	0.108521
Marine_refseq	1630	Kandleria_vitulina	2126709	3572	0	0			0
Marine_refseq	1631	Fructobacillus_fructosus	1401260	562	0	0			0
Marine_refseq	1632	Limosilactobacillus_oris	2007883	788	0	0			0
Marine_refseq	1633	Limosilactobacillus_vaginalis	1883554	747	1	0.00133869	100	42	0.00557457
Marine_refseq	1638	Listeria_ivanovii	2919548	4369	0	0			0
Marine_refseq	1639	Listeria_monocytogenes	2944528	14677	10	0.000681338	89.9804	1.9	0.023705
Marine_refseq	1640	Listeria_seeligeri	2797636	6797	0	0			0
Marine_refseq	1641	Listeria_grayi	2751104	2141	0	0			0
Marine_refseq	1642	Listeria_innocua	2887185	4085	8	0.00195838	98.0353	1	0.00997511
Marine_refseq	1643	Listeria_welshimeri	2814137	5086	0	0			0
Marine_refseq	1646	Renibacterium_salmoninarum	3155250	458	0	0			0
Marine_refseq	1648	Erysipelothrix_rhusiopathiae	1787941	864	0	0			0
Marine_refseq	1650	Kurthia_zopfii	2991625	3227	0	0			0
Marine_refseq	1652	Alloiococcus_otitis	1806596	968	0	0			0
Marine_refseq	1655	Actinomyces_naeslundii	3152123	987	51	0.0516717	97.3283	32.7843	0.143046
Marine_refseq	1657	Actinobaculum_suis	2368602	473	0	0			0
Marine_refseq	1660	Schaalia_odontolytica	2455831	1147	7	0.00610288	95.6683	23.2857	0.027567
Marine_refseq	1661	Trueperella_pyogenes	2295822	857	0	0			0
Marine_refseq	1664	Arthrobacter_glacialis	4249516	473	1	0.00211416	93.3333	8	0.00143546
Marine_refseq	1665	Arthrobacter_globiformis	4954410	628	0	0			0
Marine_refseq	1672	Arthrobacter_ramosus	5251250	295	0	0			0
Marine_refseq	1673	Rhizobium_viscosum	7069622	616	2	0.00324675	93.1235	5.5	0.00236222
Marine_refseq	1677	Arthrobacter_pascens	4634886	304	0	0			0
Marine_refseq	1681	Bifidobacterium_bifidum	2193720	849	12	0.0141343	93.3357	14.25	0.00711121
Marine_refseq	1683	Bifidobacterium_angulatum	2021974	316	0	0			0
Marine_refseq	1684	Bifidobacterium_asteroides	2190368	927	0	0			0
Marine_refseq	1688	Bifidobacterium_cuniculi	2531592	543	0	0			0
Marine_refseq	1694	Bifidobacterium_pseudolongum	1978157	1321	1	0.000757002	91.4634	3	0.00419582
Marine_refseq	1697	Corynebacterium_ammoniagenes	2790185	349	0	0			0
Marine_refseq	1703	Brevibacterium_linens	3814300	545	49	0.0899083	97.5385	32.2041	0.116483
Marine_refseq	1705	Corynebacterium_stationis	2862233	399	1	0.00250627	98.0769	42	0.00366846
Marine_refseq	1708	Cellulomonas_fimi	4266344	1580	0	0			0
Marine_refseq	1709	Cellulomonas_biazotea	4407465	845	0	0			0
Marine_refseq	1710	Cellulosimicrobium_cellulans	4411608	6247	8	0.00128061	94.0157	17.5	0.0164112
Marine_refseq	1711	Cellulomonas_flavigena	4123179	929	1	0.00107643	94.3396	23	0.00130967
Marine_refseq	1713	Oerskovia_turbata	4025089	350	1	0.00285714	95.0495	23	0.00253411
Marine_refseq	1717	Corynebacterium_diphtheriae	2463666	826	1	0.00121065	95	23	0.00328778
Marine_refseq	1718	Corynebacterium_glutamicum	3309401	1164	0	0			0
Marine_refseq	1719	Corynebacterium_pseudotuberculosis	2337763	645	0	0			0
Marine_refseq	1721	Corynebacterium_callunae	2928683	558	0	0			0
Marine_refseq	1724	Corynebacterium_renale	2335089	594	0	0			0
Marine_refseq	1725	Corynebacterium_xerosis	2686219	1094	4	0.00365631	97.3848	32.25	0.0122105
Marine_refseq	1727	Corynebacterium_variabile	3192709	569	11	0.0193322	99.0995	40.0909	0.0327935
Marine_refseq	1731	Peptoclostridium_acidaminophilum	3055036	2484	0	0			0
Marine_refseq	1732	Eubacterium_oxidoreducens	2912287	2616	5	0.00191131	93.1863	6	0.0055283
Marine_refseq	1735	Holdemanella_biformis	2477128	5733	2	0.000348857	96.2264	25	0.00629762
Marine_refseq	1736	Eubacterium_limosum	4422837	1595	0	0			0
Marine_refseq	1737	#NAME?	2943107	1300	0	0			0
Marine_refseq	1741	Thermodesulfobacterium_commune	1764045	1157	0	0			0
Marine_refseq	1744	Propionibacterium_freudenreichii	2507188	989	1	0.00101112	98.1481	42	0.0043475
Marine_refseq	1747	Cutibacterium_acnes	2494738	1693	850	0.502067	98.9832	39.5412	2.95746
Marine_refseq	1748	Acidipropionibacterium_acidipropionici	3651382	731	1	0.00136799	92.7273	8	0.00153367
Marine_refseq	1749	Acidipropionibacterium_jensenii	2999408	918	0	0			0
Marine_refseq	1750	Arachnia_propionica	3402349	1567	6	0.00382897	97.0681	35.3333	0.0162241
Marine_refseq	1753	Propioniferax_innocua	2789160	397	0	0			0
Marine_refseq	1764	Mycobacterium_avium	5173839	2161	13	0.00601573	99.6771	42	0.0195213
Marine_refseq	1766	Mycolicibacterium_fortuitum	6406072	1471	5	0.00339905	94.9991	19	0.00699337
Marine_refseq	1767	Mycobacterium_intracellulare	5645778	1352	0	0			0
Marine_refseq	1768	Mycobacterium_kansasii	6577228	663	0	0			0
Marine_refseq	1771	Mycolicibacterium_phlei	5313907	1260	8	0.00634921	93.2448	8.25	0.0127025
Marine_refseq	1772	Mycolicibacterium_smegmatis	6895172	1364	9	0.00659824	94.6488	21	0.012284
Marine_refseq	1773	Mycobacterium_tuberculosis	4411532	7027	9	0.00128077	94.498	22.2222	0.0145074
Marine_refseq	1774	Mycobacteroides_chelonae	5029817	1033	2	0.00193611	96.1822	25	0.00322079
Marine_refseq	1775	Mycobacterium_cookii	5318517	554	0	0			0
Marine_refseq	1776	Mycolicibacterium_flavescens	5973602	965	104	0.107772	99.3954	39.875	0.0953026
Marine_refseq	1778	Mycobacterium_gordonae	7601632	2758	163	0.0591008	99.2414	40.9202	0.146298
Marine_refseq	1780	Mycobacterium_malmoense	5319859	978	1	0.00102249	91.3978	3	0.00176696
Marine_refseq	1781	Mycobacterium_marinum	6450522	711	1	0.00140647	97.1831	40	0.00111619
Marine_refseq	1782	Mycolicibacter_nonchromogenicus	4465329	695	0	0			0
Marine_refseq	1783	Mycobacterium_scrofulaceum	6170273	1020	1	0.000980392	94.0594	23	0.00165309
Marine_refseq	1784	Mycobacterium_simiae	5788994	1477	0	0			0
Marine_refseq	1786	Mycolicibacterium_sphagni	6066978	1600	1	0.000625	93.0693	8	0.00168123
Marine_refseq	1787	Mycobacterium_szulgai	6672659	464	1	0.00215517	94.6429	23	0.000854232
Marine_refseq	1788	Mycolicibacter_terrae	4566186	436	0	0			0
Marine_refseq	1789	Mycobacterium_xenopi	5251936	595	0	0			0
Marine_refseq	1790	Mycobacterium_asiaticum	5969538	3173	2	0.000630318	92.9286	8	0.00264677
Marine_refseq	1791	Mycolicibacterium_aurum	6035584	978	21	0.0214724	93.5779	9.09524	0.0337664
Marine_refseq	1792	Mycolicibacterium_chitae	5461769	1037	8	0.00771456	94.3289	17.375	0.0131093
Marine_refseq	1793	Mycolicibacterium_fallax	4156821	868	4	0.00460829	94.6685	18	0.00952651
Marine_refseq	1794	Mycolicibacterium_gadium	5964999	419	14	0.0334129	96.7995	31.2857	0.0215591
Marine_refseq	1795	Mycolicibacterium_neoaurum	5421267	2117	11	0.00519603	94.4076	17.2727	0.0186857
Marine_refseq	1797	Mycolicibacterium_thermoresistibile	4950685	848	8	0.00943396	92.9996	13	0.0130285
Marine_refseq	1798	Mycolicibacillus_trivialis	3591083	732	2	0.00273224	93.4886	13	0.0055972
Marine_refseq	1799	Mycolicibacterium_aichiense	5925482	591	0	0			0
Marine_refseq	1800	Mycolicibacterium_chubuense	6021188	1641	37	0.0225472	94.5741	18.8919	0.0532287
Marine_refseq	1801	Mycobacterium_diernhoferi	5998503	735	1	0.00136054	92	8	0.000833541
Marine_refseq	1804	Mycolicibacterium_gilvum	5783292	570	29	0.0508772	96.8121	27.2414	0.0424845
Marine_refseq	1807	Mycolicibacterium_obuense	5599206	1207	48	0.039768	95.9806	26.1042	0.0673667
Marine_refseq	1810	Mycolicibacterium_vaccae	6235754	966	25	0.0258799	94.1406	15.8	0.0345107
Marine_refseq	1814	Amycolatopsis_methanolica	7237391	447	19	0.0425056	98.0717	37.8947	0.021762
Marine_refseq	1822	Nocardia_vaccinii	9224040	659	0	0			0
Marine_refseq	1823	Nocardia_otitidiscaviarum	7687583	2445	0	0			0
Marine_refseq	1824	Nocardia_asteroides	6983363	2507	1	0.000398883	92.3913	3	0.00133174
Marine_refseq	1828	Rhodococcus_fascians	5519954	1222	6	0.00490998	97.6836	33.1667	0.00746383
Marine_refseq	1829	Rhodococcus_rhodochrous	5612657	1306	0	0			0
Marine_refseq	1830	Rhodococcus_ruber	5698851	529	0	0			0
Marine_refseq	1833	Rhodococcus_erythropolis	6806506	952	0	0			0
Marine_refseq	1836	Saccharopolyspora_erythraea	8212805	2156	1	0.000463822	93.0693	8	0.00124196
Marine_refseq	1837	Saccharopolyspora_hirsuta	7549392	980	0	0			0
Marine_refseq	1838	Saccharopolyspora_hordei	5783988	867	0	0			0
Marine_refseq	1841	Nocardioides_albus	5655249	621	4	0.00644122	94.6319	23.5	0.00532249
Marine_refseq	1843	Nocardioides_jensenii	5102139	1226	94	0.0766721	96.0302	27.3617	0.128574
Marine_refseq	1844	Nocardioides_luteus	4956498	2322	15	0.00645995	93.5713	10.4667	0.0263896
Marine_refseq	1848	Pseudonocardia_thermophila	6098214	1409	0	0			0
Marine_refseq	1850	Actinopolyspora_halophila	5353291	362	1	0.00276243	95	24	0.00113949
Marine_refseq	1852	Saccharomonospora_viridis	4308349	600	2	0.00333333	100	42	0.00278529
Marine_refseq	1861	Geodermatophilus_obscurus	5322497	2099	2	0.000952835	92.9605	15.5	0.00278065
Marine_refseq	1863	Dermatophilus_congolensis	2627820	1078	3	0.00278293	93.457	6.33333	0.00681173
Marine_refseq	1866	Actinoplanes_missouriensis	8773466	946	0	0			0
Marine_refseq	1867	Actinoplanes_teichomyceticus	8287152	1048	0	0			0
Marine_refseq	1868	Actinoplanes_digitatis	9128557	1578	1	0.000633714	91.7808	3	0.000810643
Marine_refseq	1869	Actinoplanes_utahensis	9417079	1149	0	0			0
Marine_refseq	1874	Micromonospora_chalcea	6861996	764	0	0			0
Marine_refseq	1877	Micromonospora_echinospora	7125866	904	0	0			0
Marine_refseq	1880	Micromonospora_olivasterospora	7071760	741	0	0			0
Marine_refseq	1881	Micromonospora_viridifaciens	7073985	602	0	0			0
Marine_refseq	1885	Streptomyces_actuosus	8451480	1092	0	0			0
Marine_refseq	1886	Streptomyces_albidoflavus	7215712	1084	0	0			0
Marine_refseq	1888	Streptomyces_albus	8033415	2919	0	0			0
Marine_refseq	1889	Streptomyces_ambofaciens	8393598	742	0	0			0
Marine_refseq	1890	Streptomyces_antibioticus	7978920	1136	0	0			0
Marine_refseq	1892	Streptomyces_anulatus	8847108	1161	0	0			0
Marine_refseq	1893	Streptomyces_atratus	9641288	1659	0	0			0
Marine_refseq	1894	Kitasatospora_aureofaciens	8323899	2838	0	0			0
Marine_refseq	1895	Streptomyces_avidinii	9032248	550	0	0			0
Marine_refseq	1901	Streptomyces_clavuligerus	8544086	1308	1	0.000764526	94.1176	2	0.000608608
Marine_refseq	1905	Streptomyces_exfoliatus	7874957	2207	0	0			0
Marine_refseq	1907	Streptomyces_glaucescens	8426988	1418	0	0			0
Marine_refseq	1908	Streptomyces_globisporus	7783599	1029	0	0			0
Marine_refseq	1909	Streptomyces_griseolus	7537539	776	0	0			0
Marine_refseq	1911	Streptomyces_griseus	8328034	2235	0	0			0
Marine_refseq	1912	Streptomyces_hygroscopicus	9682870	2238	0	0			0
Marine_refseq	1914	Streptomyces_lavendulae	8932792	1323	2	0.00151172	92.14	2.5	0.00143292
Marine_refseq	1915	Streptomyces_lincolnensis	10319054	1792	0	0			0
Marine_refseq	1920	Streptomyces_nigrescens	9534571	613	0	0			0
Marine_refseq	1921	Streptomyces_olivaceoviridis	9763431	390	0	0			0
Marine_refseq	1923	Streptomyces_phaeochromogenes	11713170	575	0	0			0
Marine_refseq	1927	Streptomyces_rimosus	9643891	1528	0	0			0
Marine_refseq	1930	Streptomyces_scabiei	10148695	1973	0	0			0
Marine_refseq	1932	Streptomyces_tendae	8887909	880	0	0			0
Marine_refseq	1933	Streptoalloteichus_tenebrarius	7099767	1134	0	0			0
Marine_refseq	1938	Streptomyces_viridochromogenes	7827744	2407	0	0			0
Marine_refseq	1940	Streptomyces_albireticuli	8564494	1023	0	0			0
Marine_refseq	1943	Streptomyces_griseoruber	10217879	944	0	0			0
Marine_refseq	1945	Streptomyces_jumonjinensis	8465075	582	0	0			0
Marine_refseq	1946	Streptomyces_kasugaensis	9262443	483	2	0.00414079	93.0693	5.5	0.00138192
Marine_refseq	1950	Streptomyces_peucetius	9528656	470	0	0			0
Marine_refseq	1951	Streptomyces_purpureus	7458334	896	0	0			0
Marine_refseq	1954	Streptomyces_brasiliensis	10696112	939	0	0			0
Marine_refseq	1963	Streptomyces_olivochromogenes	11669312	1752	0	0			0
Marine_refseq	1967	Streptomyces_kanamyceticus	10133897	937	0	0			0
Marine_refseq	1968	Streptomyces_cellulosae	10063079	895	0	0			0
Marine_refseq	1969	Streptomyces_chartreusis	9912098	1481	0	0			0
Marine_refseq	1990	Actinomadura_atramentaria	6710579	1273	0	0			0
Marine_refseq	1992	Thermomonospora_echinospora	8649739	1417	1	0.000705716	92	3	0.00116767
Marine_refseq	1993	Actinomadura_madurae	10255144	2140	0	0			0
Marine_refseq	1997	Microtetraspora_fusca	9024887	913	1	0.00109529	92.0792	3	0.00113021
Marine_refseq	1999	Planomonospora_venezuelensis	8185542	936	0	0			0
Marine_refseq	2001	Streptosporangium_roseum	10369518	1422	0	0			0
Marine_refseq	2002	Streptosporangium_amethystogenes	10087134	1165	1	0.000858369	93.2203	8	0.000594817
Marine_refseq	2006	Thermobispora_bispora	4189976	806	2	0.00248139	92.0455	3	0.00178999
Marine_refseq	2014	Nocardiopsis_dassonvillei	6541269	866	0	0			0
Marine_refseq	2017	Streptoalloteichus_hindustanus	7279383	1178	1	0.000848896	91.6667	3	0.000837983
Marine_refseq	2020	Thermomonospora_curvata	5639016	1208	1	0.000827815	93.5484	8	0.00111722
Marine_refseq	2021	Thermobifida_fusca	3642249	899	1	0.00111235	93.0693	3	0.00280047
Marine_refseq	2030	Kibdelosporangium_aridum	12276125	1987	0	0			0
Marine_refseq	2033	Microbacterium_testaceum	3590404	4774	16	0.00335149	93.5366	11.875	0.0372939
Marine_refseq	2035	Curtobacterium_flaccumfaciens	3745652	2346	0	0			0
Marine_refseq	2039	Tropheryma_whipplei	925938	1743	3	0.00172117	93.2683	11.6667	0.0183598
Marine_refseq	2041	Aeromicrobium_erythreum	3629239	696	10	0.0143678	93.3966	10.7	0.0254599
Marine_refseq	2045	Pimelobacter_simplex	5637360	2410	9	0.00373444	93.0425	9.11111	0.0111754
Marine_refseq	2052	Mobiluncus_mulieris	2481783	704	2	0.00284091	99.4444	21.5	0.00592316
Marine_refseq	2054	Gordonia_bronchialis	5290012	851	20	0.0235018	96.1447	28.1	0.0303969
Marine_refseq	2055	Gordonia_terrae	5701501	508	7	0.0137795	99.2854	13.8571	0.0112076
Marine_refseq	2057	Sphaerobacter_thermophilus	3993764	1163	3	0.00257954	98.1278	36	0.00548355
Marine_refseq	2061	Tsukamurella_paurometabola	4479724	1547	1	0.000646412	93.0693	8	0.00227693
Marine_refseq	2064	Kitasatospora_griseola	8578408	791	0	0			0
Marine_refseq	2065	Kitasatospora_phosalacinea	7620895	1999	0	0			0
Marine_refseq	2072	Saccharothrix_australiensis	7861373	1209	0	0			0
Marine_refseq	2074	Pseudonocardia_autotrophica	7535285	1204	1	0.000830565	100	1	0.000862608
Marine_refseq	2088	Anaeroplasma_bactoclasticum	2199979	4320	0	0			0
Marine_refseq	2094	Mycoplasmopsis_arginini	678592	3084	0	0			0
Marine_refseq	2095	Mycoplasma_capricolum	1010023	6431	3	0.00046649	90.7812	2	0.00752458
Marine_refseq	2096	Mycoplasma_gallisepticum	981408	1972	0	0			0
Marine_refseq	2097	Mycoplasma_genitalium	580076	1597	1	0.000626174	95.3846	24	0.0113778
Marine_refseq	2098	Metamycoplasma_hominis	715165	7349	0	0			0
Marine_refseq	2099	Mesomycoplasma_hyopneumoniae	897405	2926	0	0			0
Marine_refseq	2100	Mesomycoplasma_hyorhinis	838863	3908	0	0			0
Marine_refseq	2102	Mycoplasma_mycoides	1035494	4789	0	0			0
Marine_refseq	2105	Mycoplasma_leachii	1008951	1716	1	0.000582751	92.0792	3	0.0101095
Marine_refseq	2107	Mycoplasmopsis_pulmonis	962791	2630	0	0			0
Marine_refseq	2109	Mycoplasmopsis_synoviae	846495	2127	0	0			0
Marine_refseq	2110	Mycoplasmopsis_agalactiae	877438	5786	0	0			0
Marine_refseq	2111	Metamycoplasma_arthritidis	806209	1221	0	0			0
Marine_refseq	2112	Mycoplasmopsis_bovigenitalium	841512	3112	0	0			0
Marine_refseq	2113	Mycoplasmopsis_californica	793841	1104	0	0			0
Marine_refseq	2114	Entomoplasma_ellychniae	900037	820	0	0			0
Marine_refseq	2115	Mycoplasmopsis_fermentans	1118751	2109	0	0			0
Marine_refseq	2116	Malacoplasma_iowae	1278574	4751	0	0			0
Marine_refseq	2118	Mesomycoplasma_mobile	777079	3106	2	0.000643915	92.3	5.5	0.0225202
Marine_refseq	2120	Mesomycoplasma_neurolyticum	1040908	3482	0	0			0
Marine_refseq	2121	Metamycoplasma_orale	806218	2097	0	0			0
Marine_refseq	2122	Mycoplasma_pirum	839829	3829	1	0.000261165	91.0714	3	0.0067871
Marine_refseq	2123	Mycoplasma_putrefaciens	832598	2415	0	0			0
Marine_refseq	2124	Metamycoplasma_salivarium	728347	3204	1	0.00031211	92.3077	3	0.0144162
Marine_refseq	2127	Mesomycoplasma_collis	902877	3586	0	0			0
Marine_refseq	2130	Ureaplasma_urealyticum	881828	3358	0	0			0
Marine_refseq	2133	Spiroplasma_citri	1640878	470	0	0			0
Marine_refseq	2134	Spiroplasma_melliferum	1297943	622	0	0			0
Marine_refseq	2136	Spiroplasma_monobiae	891575	1883	0	0			0
Marine_refseq	2137	Spiroplasma_apis	1160554	3100	0	0			0
Marine_refseq	2138	Spiroplasma_poulsonii	1966068	1058	1	0.00094518	91.0891	3	0.00493371
Marine_refseq	2139	Spiroplasma_clarkii	1560007	3055	0	0			0
Marine_refseq	2143	Spiroplasma_gladiatoris	1164642	3672	1	0.000272331	93.1034	8	0.00506593
Marine_refseq	2145	Spiroplasma_taiwanense	1086278	5132	0	0			0
Marine_refseq	2148	Acholeplasma_laidlawii	1496992	5053	0	0			0
Marine_refseq	2149	Mesoplasma_entomophilum	847967	1223	0	0			0
Marine_refseq	2150	Haploplasma_modicum	1219180	5764	2	0.000346981	95.0248	23	0.0091865
Marine_refseq	2151	Mesoplasma_florum	793224	2660	0	0			0
Marine_refseq	2162	Methanobacterium_formicicum	2494510	3393	1	0.000294724	99.0099	42	0.00408898
Marine_refseq	2173	Methanobrevibacter_smithii	1853160	3053	3	0.00098264	93.9079	17.3333	0.0116558
Marine_refseq	2176	Methanohalophilus_mahii	2012424	463	0	0			0
Marine_refseq	2186	Methanothermococcus_thermolithotrophicus	1706496	1390	0	0			0
Marine_refseq	2187	Methanococcus_vannielii	1720048	1934	0	0			0
Marine_refseq	2188	Methanococcus_voltae	1780593	9275	0	0			0
Marine_refseq	2189	Methanotorris_igneus	1854197	1654	0	0			0
Marine_refseq	2190	Methanocaldococcus_jannaschii	1739927	2686	0	0			0
Marine_refseq	2200	Methanoculleus_thermophilus	2223235	280	0	0			0
Marine_refseq	2203	Methanospirillum_hungatei	3544738	1677	0	0			0
Marine_refseq	2205	Methanomicrobium_mobile	1711791	392	2	0.00510204	93.0347	3	0.00595867
Marine_refseq	2208	Methanosarcina_barkeri	4574907	2514	0	0			0
Marine_refseq	2209	Methanosarcina_mazei	4142816	2656	0	0			0
Marine_refseq	2210	Methanosarcina_thermophila	3127379	1512	0	0			0
Marine_refseq	2214	Methanosarcina_acetivorans	5751492	1127	0	0			0
Marine_refseq	2221	Methanolobus_tindarius	3151883	1196	0	0			0
Marine_refseq	2223	Methanothrix_soehngenii	3026645	334	1	0.00299401	93.9394	23	0.00221367
Marine_refseq	2224	Methanothrix_thermoacetophila	1879471	385	0	0			0
Marine_refseq	2226	Methanococcoides_methylutens	2508511	1412	0	0			0
Marine_refseq	2234	Archaeoglobus_fulgidus	2178400	395	0	0			0
Marine_refseq	2261	Pyrococcus_furiosus	1889914	858	0	0			0
Marine_refseq	2265	Thermococcus_litoralis	2215172	320	0	0			0
Marine_refseq	2271	Thermoproteus_tenax	1841542	239	0	0			0
Marine_refseq	2280	Staphylothermus_marinus	1570485	882	0	0			0
Marine_refseq	2283	Acidianus_ambivalens	2252027	576	0	0			0
Marine_refseq	2285	Sulfolobus_acidocaldarius	2225959	1543	0	0			0
Marine_refseq	2286	Saccharolobus_shibatae	2916875	1355	0	0			0
Marine_refseq	2287	Saccharolobus_solfataricus	2658139	1743	0	0			0
Marine_refseq	2290	Desulfobacter_curvatus	5644283	1656	0	0			0
Marine_refseq	2291	Desulfobacter_hydrogenophilus	5157696	3217	21	0.00652782	93.8113	12.0952	0.0293154
Marine_refseq	2292	Desulfobacter_latus	4317866	1827	4	0.00218938	93.8018	13.25	0.00481719
Marine_refseq	2293	Desulfobacter_postgatei	3974658	1565	2	0.00127796	94.0594	13	0.00513252
Marine_refseq	2296	Desulforapulum_autotrophicum	5657782	2679	8	0.00298619	95.362	1.375	0.00950903
Marine_refseq	2298	Desulfocicer_vacuolatum	5035799	2624	1	0.000381098	92.5	3	0.00160848
Marine_refseq	2303	Thermoplasma_acidophilum	1564906	302	0	0			0
Marine_refseq	2315	Methanoplanus_limicola	3200946	1077	0	0			0
Marine_refseq	2317	Methanosphaera_stadtmanae	1767403	628	0	0			0
Marine_refseq	2322	Methanohalobium_evestigatum	2406232	2057	0	0			0
Marine_refseq	2325	Thermoanaerobacter_kivui	2397824	2474	0	0			0
Marine_refseq	2331	Halanaerobium_praevalens	2309262	8729	0	0			0
Marine_refseq	2340	Solemya_velum_gill_symbiont	2629178	4422	49	0.011081	93.8267	13.3265	0.0171156
Marine_refseq	2350	Haliscomenobacter_hydrossis	8771651	3392	17	0.00501179	95.6085	1.64706	0.00964471
Marine_refseq	2352	Flexistipes_sinusarabici	2526590	4603	0	0			0
Marine_refseq	2355	unidentified_bacterial_endosymbiont	1661850	1852	13	0.00701944	97.9077	1	0.0205795
Marine_refseq	2358	Desulfomonile_tiedjei	6527027	1748	34	0.0194508	94.0241	14.5882	0.019381
Marine_refseq	2360	Bathymodiolus_thermophilus_thioautotrophic_gill_symbiont	2832685	12931	13	0.00100534	92.7138	4.92308	0.0247115
Marine_refseq	2369	Arhodomonas_aquaeolei	3957769	650	6	0.00923077	94.9319	23.8333	0.0142757
Marine_refseq	2371	Xylella_fastidiosa	2600197	3625	3	0.000827586	94.8092	1.33333	0.0105377
Marine_refseq	2374	Acetonema_longum	4323011	1772	0	0			0
Marine_refseq	2377	Sporomusa_termitida	5316008	1431	0	0			0
Marine_refseq	2378	Sporomusa_ovata	5433971	1189	0	0			0
Marine_refseq	2382	Acetitomaculum_ruminis	3082721	4667	0	0			0
Marine_refseq	2421	Thermosipho_africanus	2016657	4701	0	0			0
Marine_refseq	2424	Fervidobacterium_nodosum	1948941	808	0	0			0
Marine_refseq	2426	Teredinibacter_turnerae	5348823	9676	287	0.029661	98.1873	8.43554	0.172842
Marine_refseq	2434	Roseobacter_denitrificans	4308791	2500	13	0.0052	93.4127	13.2308	0.0196111
Marine_refseq	2698	Heliobacterium_chlorum	4147899	2197	0	0			0
Marine_refseq	2699	Heliomicrobium_gestii	3685747	644	0	0			0
Marine_refseq	2702	Gardnerella_vaginalis	1667406	9158	2	0.000218388	98.5149	41	0.0121746
Marine_refseq	2718	Cardiobacterium_hominis	2670755	1349	2	0.00148258	96.4961	33	0.00617803
Marine_refseq	2724	Hirschia_baltica	3540114	8721	118	0.0135306	97.3957	31.2034	0.275867
Marine_refseq	2734	Symbiobacterium_thermophilum	3566135	1019	1	0.000981354	93.5065	23	0.00218724
Marine_refseq	2736	Verrucomicrobium_spinosum	8220857	2803	8	0.00285408	93.4699	8	0.00478052
Marine_refseq	2738	Vagococcus_fluvialis	2651514	16859	1	5.93155e-05	92.3077	3	0.00199886
Marine_refseq	2739	Vagococcus_salmoninarum	3104446	2107	0	0			0
Marine_refseq	2741	Peptococcus_niger	1968473	1389	0	0			0
Marine_refseq	2743	Marinobacter_nauticus	3989480	133371	57706	0.432673	97.5284	34.9437	52.9726
Marine_refseq	2746	Halomonas_elongata	4061825	1276	35	0.0274295	94.0757	14.2	0.0454229
Marine_refseq	2748	Carnobacterium_divergens	2629627	7973	9	0.00112881	96.511	25.1111	0.0359367
Marine_refseq	2749	Carnobacterium_gallinarum	4041428	3206	0	0			0
Marine_refseq	2750	Carnobacterium_mobile	2632867	2253	0	0			0
Marine_refseq	2751	Carnobacterium_maltaromaticum	3502975	10526	80	0.00760023	96.9862	34.1625	0.210107
Marine_refseq	2752	Carnobacterium_funditum	2352439	2497	0	0			0
Marine_refseq	2756	Brochothrix_thermosphacta	2578375	3892	2	0.000513875	100	42	0.00814466
Marine_refseq	2757	Brochothrix_campestris	2324176	1141	12	0.0105171	97.1329	1	0.00692719
Marine_refseq	12915	Acidianus_infernus	2222414	1352	0	0			0
Marine_refseq	13076	Globicatella_sanguinis	2622382	1047	0	0			0
Marine_refseq	13160	Brevundimonas_bullata	3484100	660	7	0.0106061	96.3737	33.2857	0.0166758
Marine_refseq	13243	Rarobacter_faecitabidus	2804931	426	2	0.00469484	93.5935	8	0.00730856
Marine_refseq	13264	Brachyspira_innocens	3281611	2599	0	0			0
Marine_refseq	13276	Suttonella_indologenes	2507163	1963	0	0			0
Marine_refseq	13335	Anaerobiospirillum_succiniciproducens	3804739	1409	1	0.000709723	90.4762	3	0.00168211
Marine_refseq	13656	Rhizorhapis_suberifaciens	3360228	1466	12	0.00818554	94.3831	14.25	0.0282719
Marine_refseq	13689	Sphingomonas_paucimobilis	4367078	352	15	0.0426136	97.4949	30.4667	0.026883
Marine_refseq	13690	Sphingobium_yanoikuyae	5532633	10790	1009	0.0935125	96.8251	32.1031	1.61925
Marine_refseq	13725	Thiocystis_violacea	5368928	2379	2	0.000840689	95.4645	22.5	0.00376239
Marine_refseq	13769	Natrialba_magadii	4443643	552	0	0			0
Marine_refseq	28025	Bifidobacterium_animalis	1938483	489	0	0			0
Marine_refseq	28026	Bifidobacterium_pseudocatenulatum	2313752	1085	1	0.000921659	99.0099	42	0.00440842
Marine_refseq	28031	Lysinibacillus_fusiformis	4843789	9333	0	0			0
Marine_refseq	28034	Sulfobacillus_thermosulfidooxidans	3861015	5517	0	0			0
Marine_refseq	28035	Staphylococcus_lugdunensis	2571829	570	0	0			0
Marine_refseq	28037	Streptococcus_mitis	1906344	21168	113	0.00533825	95.9986	26.292	0.548747
Marine_refseq	28038	Latilactobacillus_curvatus	1916521	1958	1	0.000510725	99.0099	42	0.00532214
Marine_refseq	28042	Saccharopolyspora_rectivirgula	3961468	591	9	0.0152284	94.9647	13.4444	0.00441755
Marine_refseq	28044	Streptomyces_longisporoflavus	9802249	1316	0	0			0
Marine_refseq	28045	Mycobacterium_celatum	4720680	435	0	0			0
Marine_refseq	28047	Mycolicibacterium_confluentis	5876557	1074	9	0.00837989	96.1403	27.3333	0.0127115
Marine_refseq	28049	Acidothermus_cellulolyticus	2443540	731	1	0.00136799	92.0792	3	0.00417427
Marine_refseq	28051	Lachnospira_multipara	2871860	8649	0	0			0
Marine_refseq	28052	Lachnospira_pectinoschiza	2704308	6570	0	0			0
Marine_refseq	28064	Heliobacterium_mobile	4116862	640	0	0			0
Marine_refseq	28068	Rubrivivax_gelatinosus	5075359	2825	1	0.000353982	92.1053	3	0.00151713
Marine_refseq	28072	Nostoc_sp._PCC_7524	6718869	3020	1	0.000331126	93.0693	2	0.00148835
Marine_refseq	28077	Nitrospirillum_amazonense	6874351	5099	13	0.00254952	94.6597	20.2308	0.00914995
Marine_refseq	28080	Campylobacter_upsaliensis	1628950	8514	0	0			0
Marine_refseq	28082	Legionella_anisa	4362280	3684	2	0.000542888	95.2614	31.5	0.00245285
Marine_refseq	28083	Legionella_birminghamensis	3789238	3573	0	0			0
Marine_refseq	28084	Legionella_cherrii	3696762	6383	1	0.000156666	93.0693	8	0.00275917
Marine_refseq	28085	Legionella_cincinnatiensis	4098995	5905	0	0			0
Marine_refseq	28087	Legionella_sainthelensi	4597280	12578	2	0.000159008	94.2462	13.5	0.00339331
Marine_refseq	28088	Legionella_wadsworthii	3602617	8643	23	0.00266111	91.2771	2.26087	0.0078554
Marine_refseq	28090	Acinetobacter_lwoffii	3528101	4611	78	0.0169161	97.2597	32.5385	0.12613
Marine_refseq	28091	Neisseria_weaveri	2238481	1248	1	0.000801282	100	1	0.00455666
Marine_refseq	28092	Robbsia_andropogonis	6828120	1301	1	0.00076864	94.2308	23	0.000776202
Marine_refseq	28094	Trinickia_caryophylli	6589281	937	1	0.00106724	92.0792	2	0.00154797
Marine_refseq	28095	Burkholderia_gladioli	8201484	4492	1	0.000222618	95	2	0.00123148
Marine_refseq	28097	Ralstonia_syzygii	5521407	324	0	0			0
Marine_refseq	28099	Agrobacterium_rubi	5293384	1752	6	0.00342466	91.9869	3	0.00506292
Marine_refseq	28101	Phyllobacterium_myrsinacearum	5424106	2677	2	0.000747105	94.2308	15.5	0.00291292
Marine_refseq	28104	Mesorhizobium_huakuii	7212699	486	1	0.00205761	96.6667	40	0.000845731
Marine_refseq	28107	Pseudoalteromonas_espejiana	4500451	2700	245	0.0907407	95.8054	23.6653	0.40256
Marine_refseq	28108	Alteromonas_macleodii	4867393	579006	292691	0.505506	97.7108	36.2048	73.3858
Marine_refseq	28109	Pseudoalteromonas_nigrifaciens	4274777	777	71	0.0913771	97.5561	29.5211	0.104918
Marine_refseq	28110	Francisella_philomiragia	2017543	17468	14	0.000801466	95.1202	19.2143	0.0635922
Marine_refseq	28111	Bacteroides_eggerthii	4206509	1258	0	0			0
Marine_refseq	28112	Tannerella_forsythia	3405521	2605	13	0.0049904	98.7292	4.15385	0.0166788
Marine_refseq	28113	Bacteroides_heparinolyticus	3608975	1201	0	0			0
Marine_refseq	28114	Porphyromonas_levii	2261978	1485	0	0			0
Marine_refseq	28115	Porphyromonas_macacae	2214526	1870	0	0			0
Marine_refseq	28116	Bacteroides_ovatus	6472489	2696	2	0.00074184	98.9845	1	0.00307455
Marine_refseq	28117	Alistipes_putredinis	2550678	602	2	0.00332226	100	42	0.00795867
Marine_refseq	28118	Odoribacter_splanchnicus	4392177	3654	2	0.000547345	98.3333	21.5	0.00357454
Marine_refseq	28119	Bacteroides_zoogleoformans	3361794	1195	0	0			0
Marine_refseq	28124	Porphyromonas_endodontalis	2102930	663	4	0.00603318	97.52	40.5	0.0168812
Marine_refseq	28125	Prevotella_bivia	2521238	2855	3	0.00105079	99.3366	42	0.0120972
Marine_refseq	28127	Prevotella_buccalis	3307707	1462	4	0.00273598	97.7723	27.25	0.0100674
Marine_refseq	28128	Prevotella_corporis	2800206	1924	3	0.00155925	99.6169	42	0.0106421
Marine_refseq	28129	Prevotella_denticola	3106544	844	14	0.0165877	98.7991	40.4286	0.0409458
Marine_refseq	28130	Prevotella_disiens	3051352	3340	11	0.00329341	99.0999	36.9091	0.0273977
Marine_refseq	28131	Prevotella_intermedia	2674170	3832	2	0.000521921	96.0396	25	0.00762854
Marine_refseq	28132	Prevotella_melaninogenica	3168282	8116	14	0.00172499	97.431	33.7857	0.0444405
Marine_refseq	28133	Prevotella_nigrescens	2887107	2097	14	0.0066762	98.5969	39.3571	0.047487
Marine_refseq	28135	Prevotella_oris	3168212	502	23	0.0458167	98.2307	38.7826	0.0710495
Marine_refseq	28136	Prevotella_oulorum	2805893	784	1	0.00127551	99.0385	42	0.00374212
Marine_refseq	28137	Prevotella_veroralis	2990547	1258	2	0.00158983	98.0341	41	0.00692181
Marine_refseq	28139	Rikenella_microfusus	2880076	396	0	0			0
Marine_refseq	28141	Cronobacter_sakazakii	4437993	12642	9	0.000711913	95.7407	1.33333	0.0150518
Marine_refseq	28151	Serratia_proteamaculans	5525200	1591	5	0.00314268	98.6139	41.6	0.00923044
Marine_refseq	28152	Yersinia_kristensenii	4733508	1893	0	0			0
Marine_refseq	28156	Spirabiliibacterium_mucosae	2151200	824	3	0.00364078	95.3762	22.6667	0.0110636
Marine_refseq	28159	Caviibacterium_pharyngocola	2486286	1347	0	0			0
Marine_refseq	28161	Conservatibacter_flavescens	2607477	3954	0	0			0
Marine_refseq	28169	Vibrio_pelagius	4963975	2185	7	0.00320366	95.4738	24	0.0143836
Marine_refseq	28171	Vibrio_aestuarianus	4144461	2290	1	0.000436681	100	1	0.00246112
Marine_refseq	28172	Vibrio_metschnikovii	3831334	2956	2	0.00067659	94.1555	1.5	0.00535062
Marine_refseq	28173	Vibrio_nigripulchritudo	6389377	5893	6	0.00101816	96.3597	24	0.00953145
Marine_refseq	28175	Vibrio_orientalis	4698244	1376	2	0.00145349	97.4247	41	0.00415049
Marine_refseq	28176	Candidatus_Photodesmus_katoptron	1000156	8998	4	0.000444543	92.4564	9.25	0.0315951
Marine_refseq	28181	Magnetovibrio_blakemorei	3638804	7047	650	0.0922378	95.1375	21.8585	0.126992
Marine_refseq	28182	Leptospira_noguchii	4710917	10622	1	9.41442e-05	92	3	0.00214396
Marine_refseq	28183	Leptospira_santarosai	3983611	2374	0	0			0
Marine_refseq	28184	Leptospira_weilii	4381393	3196	0	0			0
Marine_refseq	28187	Acetohalobium_arabaticum	2469596	4012	0	0			0
Marine_refseq	28188	Capnocytophaga_canimorsus	2414275	12636	7	0.000553973	95.3948	11.2857	0.0209587
Marine_refseq	28189	Capnocytophaga_cynodegmi	2640475	14431	7	0.000485067	94.2674	2.14286	0.017459
Marine_refseq	28195	Thermonema_lapsum	2693118	1268	0	0			0
Marine_refseq	28197	Aliarcobacter_butzleri	2341251	51134	1	1.95565e-05	94.4444	23	0.00234917
Marine_refseq	28198	Aliarcobacter_cryaerophilus	2108340	54515	4	7.33743e-05	93.3518	8.25	0.0108142
Marine_refseq	28199	Arcobacter_nitrofigilis	3192235	8452	2	0.00023663	96.9019	40	0.00516879
Marine_refseq	28200	Aliarcobacter_skirrowii	1969846	8254	1	0.000121153	98.0198	6	0.00517807
Marine_refseq	28210	Chelatococcus_asaccharovorans	7299678	1321	16	0.012112	97.383	33.9375	0.0115485
Marine_refseq	28212	Sphingomonas_adhaesiva	3760237	571	3	0.00525394	95.1446	19.3333	0.00702083
Marine_refseq	28213	Sphingomonas_parapaucimobilis	3994522	318	10	0.0314465	94.8439	17.1	0.0213042
Marine_refseq	28220	Brachymonas_denitrificans	2712870	946	1	0.00105708	92.5926	3	0.00401789
Marine_refseq	28223	Desulfobacula_toluolica	5197905	1752	0	0			0
Marine_refseq	28224	Mesoplasma_seiffertii	977957	2005	0	0			0
Marine_refseq	28227	Malacoplasma_penetrans	1358633	3805	2	0.000525624	93.3887	13.5	0.0116293
Marine_refseq	28229	Colwellia_psychrerythraea	5373180	12924	19	0.00147013	94.552	16.3684	0.0303359
Marine_refseq	28230	Carnobacterium_alterfunditum	2548842	743	0	0			0
Marine_refseq	28234	Geotoga_petraea	2150220	8193	1	0.000122055	93	2	0.00465069
Marine_refseq	28237	Petrotoga_miotherma	2107090	478	0	0			0
Marine_refseq	28251	Ornithobacterium_rhinotracheale	2399175	11842	7	0.000591116	96.7152	1	0.0210906
Marine_refseq	28252	Halomonas_halodenitrificans	3464094	895	30	0.0335196	96.7829	25.8333	0.0669728
Marine_refseq	28254	Marinomonas_communis	3854463	5559	637	0.114589	98.1252	37.5275	1.44422
Marine_refseq	28258	Cobetia_marina	4176400	2579	343	0.132997	95.4214	23.0816	0.68152
Marine_refseq	28320	Mycoplana_dimorpha	4592697	765	2	0.00261438	95.5446	24	0.00444183
Marine_refseq	28444	Herbidospora_cretacea	8282092	1547	0	0			0
Marine_refseq	28445	Mycobacterium_intermedium	6885661	613	4	0.00652529	93.0978	8	0.00241081
Marine_refseq	28446	Anaerotignum_propionicum	3120417	4308	0	0			0
Marine_refseq	28447	Clavibacter_michiganensis	3377556	6510	11	0.00168971	94.1116	15.4545	0.0140338
Marine_refseq	28448	Komagataeibacter_xylinus	3727795	1447	0	0			0
Marine_refseq	28450	Burkholderia_pseudomallei	7081111	6412	36	0.00561447	94.3934	3.86111	0.0326361
Marine_refseq	28452	Leptospira_alstonii	4436408	2119	0	0			0
Marine_refseq	28454	Sphingobacterium_multivorum	5965850	1008	1	0.000992063	100	42	0.00176002
Marine_refseq	28885	Hydrogenovibrio_marinus	2491293	2954	1	0.000338524	93.0693	3	0.00409426
Marine_refseq	28887	Planobispora_longispora	8845392	832	0	0			0
Marine_refseq	28893	Streptomyces_pilosus	7585172	562	0	0			0
Marine_refseq	28894	Streptomyces_nitrosporeus	7581562	694	0	0			0
Marine_refseq	28896	Thermoanaerobacterium_saccharolyticum	2837411	1320	0	0			0
Marine_refseq	28898	Campylobacter_helveticus	1871495	4043	0	0			0
Marine_refseq	28901	Salmonella_enterica	4951383	25799	45	0.00174425	97.3126	1.02222	0.0368382
Marine_refseq	28903	Mycoplasmopsis_bovis	1003404	4057	0	0			0
Marine_refseq	28907	Caedibacter_taeniospiralis	1323505	3944	7	0.00177485	95.498	11.2857	0.0500943
Marine_refseq	29292	Pyrococcus_abyssi	1768562	1846	1	0.000541712	92.1875	3	0.0036753
Marine_refseq	29299	Nocardioides_plantarum	4681321	3087	179	0.0579851	94.2711	16.3408	0.270885
Marine_refseq	29311	Mycobacterium_haemophilum	4235765	351	1	0.002849	92.0792	3	0.00240807
Marine_refseq	29313	Mycobacterium_shimoidei	4842631	946	0	0			0
Marine_refseq	29314	Mycolicibacter_hiberniae	4396654	418	2	0.00478469	95.1789	24	0.00434421
Marine_refseq	29316	Schaalia_hyovaginalis	2346665	636	1	0.00157233	94.2529	8	0.00375
Marine_refseq	29320	Paenarthrobacter_nicotinovorans	4481325	662	0	0			0
Marine_refseq	29321	Corynebacterium_otitidis	2118285	750	2	0.00266667	100	42	0.00906394
Marine_refseq	29322	#NAME?	3331935	846	0	0			0
Marine_refseq	29324	Caldicellulosiruptor_naganoensis	2494610	3471	1	0.000288101	97.9798	1	0.00400864
Marine_refseq	29329	Thermoanaerobacterium_xylanolyticum	2534358	2414	0	0			0
Marine_refseq	29332	Domibacillus_aminovorans	3731130	2288	0	0			0
Marine_refseq	29341	Clostridium_argentinense	4803058	8889	1	0.000112499	92.0792	3	0.00212365
Marine_refseq	29344	Caloramator_fervidus	1763241	6484	0	0			0
Marine_refseq	29345	Sedimentibacter_hydroxybenzoicus	3809287	7386	1	0.000135391	91.6667	3	0.00191637
Marine_refseq	29347	#NAME?	3658040	1850	0	0			0
Marine_refseq	29348	#NAME?	2528470	14425	0	0			0
Marine_refseq	29350	Thermoanaerobacter_thermocopriae	2455744	493	0	0			0
Marine_refseq	29354	Lacrimispora_celerecrescens	5272838	2302	0	0			0
Marine_refseq	29355	Ruminiclostridium_cellobioparum	6132222	4883	1	0.000204792	90.9091	3	0.00145135
Marine_refseq	29357	Clostridium_collagenovorans	3482404	10707	0	0			0
Marine_refseq	29358	Paeniclostridium_ghonii	3657532	6342	0	0			0
Marine_refseq	29359	Asaccharospora_irregularis	2622699	4883	0	0			0
Marine_refseq	29360	Cellulosilyticum_lentocellum	4714237	1668	4	0.00239808	90.6544	2.25	0.00513339
Marine_refseq	29362	Ruminiclostridium_papyrosolvens	5027861	6206	0	0			0
Marine_refseq	29363	Clostridium_paraputrificum	3561289	10739	0	0			0
Marine_refseq	29364	#NAME?	3458343	3144	0	0			0
Marine_refseq	29365	Hathewaya_proteolytica	2818024	6076	1	0.000164582	92.1569	3	0.00184526
Marine_refseq	29367	Clostridium_puniceum	6082167	10119	1	9.8824e-05	94.0594	8	0.00167703
Marine_refseq	29369	Clostridium_sardiniense	3942322	11379	0	0			0
Marine_refseq	29370	Lacrimispora_sphenoides	5309474	1988	1	0.000503018	90	2	0.00190226
Marine_refseq	29372	Clostridium_thermobutyricum	3505620	17413	0	0			0
Marine_refseq	29373	Clostridium_thermopalmarium	2819317	735	0	0			0
Marine_refseq	29376	Desulfofundulus_thermobenzoicus	3716015	818	0	0			0
Marine_refseq	29378	Staphylococcus_arlettae	2706864	1582	5	0.00316056	99.2079	42	0.0175849
Marine_refseq	29379	Staphylococcus_auricularis	2216575	3325	17	0.00511278	99.2462	39.8235	0.0732211
Marine_refseq	29380	Staphylococcus_caprae	2598513	1898	0	0			0
Marine_refseq	29382	Staphylococcus_cohnii	2694244	4455	101	0.0226712	99.7319	41.6733	0.330408
Marine_refseq	29384	Staphylococcus_kloosii	2639038	5582	4	0.000716589	97.1154	28.5	0.0104962
Marine_refseq	29385	Staphylococcus_saprophyticus	2577899	3780	18	0.0047619	99.2881	42	0.0678459
Marine_refseq	29388	Staphylococcus_capitis	2497742	5765	58	0.0100607	98.4992	37.3621	0.217356
Marine_refseq	29391	Gemella_morbillorum	1760930	5851	4	0.000683644	98.0576	32.25	0.0209548
Marine_refseq	29394	Dolosigranulum_pigrum	1862135	7203	27	0.00374844	98.2882	36.8519	0.135382
Marine_refseq	29396	Saccharococcus_thermophilus	3145141	1111	0	0			0
Marine_refseq	29405	Microlunatus_phosphovorus	5683123	784	4	0.00510204	95.3358	24	0.00550754
Marine_refseq	29408	Rhodoplanes_elegans	6538588	1458	4	0.00274348	94.3374	17.75	0.00489402
Marine_refseq	29409	Rhodoplanes_roseus	6879536	1612	3	0.00186104	93.7457	15.3333	0.003445
Marine_refseq	29419	Helicobacter_canis	1930063	3094	1	0.000323206	93.0693	8	0.0052848
Marine_refseq	29421	Nitrobacter_vulgaris	4293395	698	6	0.00859599	96.9775	29.8333	0.0117855
Marine_refseq	29422	Legionella_brunensis	3750738	7839	7	0.000892971	93.4501	13.1429	0.00999803
Marine_refseq	29423	Legionella_oakridgensis	2668211	5962	13	0.00218048	94.4341	14.1538	0.0212877
Marine_refseq	29428	Methylorubrum_rhodinum	5406054	649	1	0.00154083	94.0594	8	0.00188677
Marine_refseq	29429	Methylorubrum_zatmanii	5389031	666	15	0.0225225	98.02	35.1333	0.0225458
Marine_refseq	29430	Acinetobacter_haemolyticus	3441166	6578	3	0.000456066	96.3696	24.6667	0.00889233
Marine_refseq	29432	Psychrobacter_phenylpyruvicus	3275513	2552	8	0.0031348	98.0186	35.125	0.0120592
Marine_refseq	29433	Moraxella_ovis	2306095	554	0	0			0
Marine_refseq	29435	Pseudomonas_flavescens	5849540	689	1	0.00145138	96.9388	40	0.00169244
Marine_refseq	29438	Pseudomonas_savastanoi	5999881	586	0	0			0
Marine_refseq	29442	Pseudomonas_tolaasii	6792797	1208	9	0.00745033	96.0279	25.4444	0.0109675
Marine_refseq	29443	Paucimonas_lemoignei	4215120	668	0	0			0
Marine_refseq	29446	Xanthomonas_sp.	5069976	700	0	0			0
Marine_refseq	29447	Xanthomonas_albilineans	3756117	756	0	0			0
Marine_refseq	29448	Bradyrhizobium_elkanii	9518205	2192	5	0.00228102	95.1987	26.2	0.00511651
Marine_refseq	29449	Rhizobium_etli	6530228	1056	2	0.00189394	93.0288	13	0.00245014
Marine_refseq	29450	Rhizobium_leucaenae	6679728	699	7	0.0100143	92.978	7.28571	0.0059733
Marine_refseq	29466	Veillonella_parvula	2132142	4074	252	0.0618557	97.1399	32.3333	1.09857
Marine_refseq	29471	Pectobacterium_atrosepticum	5024250	954	0	0			0
Marine_refseq	29483	Yersinia_aldovae	4471090	2054	3	0.00146056	99.6914	42	0.00731365
Marine_refseq	29484	Yersinia_frederiksenii	4941872	2275	0	0			0
Marine_refseq	29485	Yersinia_rohdei	4372253	2101	0	0			0
Marine_refseq	29486	Yersinia_ruckeri	3894226	2294	7	0.00305144	94.9081	18.8571	0.0166143
Marine_refseq	29488	Photorhabdus_luminescens	5464970	3885	5	0.001287	93.8077	2.8	0.00376946
Marine_refseq	29489	Aeromonas_enteropelogenes	4392400	886	1	0.00112867	98.0198	1	0.00232219
Marine_refseq	29494	Vibrio_furnissii	4993326	2269	2	0.000881446	96.7105	4.5	0.00288385
Marine_refseq	29495	Vibrio_navarrensis	4439391	2988	52	0.0174029	97.1117	31.6346	0.0375727
Marine_refseq	29497	Vibrio_splendidus	5449819	12973	152	0.0117166	96.8588	15.8289	0.185676
Marine_refseq	29498	Vibrio_tubiashii	5540337	31113	13882	0.44618	98.3259	37.2662	1.79504
Marine_refseq	29503	Desulfomicrobium_escambiense	3782107	613	1	0.00163132	92.9577	3	0.0019037
Marine_refseq	29506	Leptospira_inadai	4457871	1614	1	0.000619579	99.0099	6	0.00228809
Marine_refseq	29507	Leptospira_kirschneri	4409424	1892	0	0			0
Marine_refseq	29508	Leptospira_meyeri	4237206	3054	0	0			0
Marine_refseq	29510	Turneriella_parva	4409302	1368	1	0.000730994	96.2963	24	0.00124736
Marine_refseq	29511	Leptospira_wolbachii	4081981	2144	0	0			0
Marine_refseq	29518	Borreliella_afzelii	987652	1172	0	0			0
Marine_refseq	29519	Borreliella_garinii	905692	6338	0	0			0
Marine_refseq	29520	Borrelia_crocidurae	920157	860	0	0			0
Marine_refseq	29522	Brachyspira_aalborgi	2609344	18980	3	0.000158061	93.5573	6.33333	0.00505874
Marine_refseq	29524	Porphyromonas_circumdentaria	2033794	1048	0	0			0
Marine_refseq	29528	Flammeovirga_aprica	9310590	6819	8	0.00117319	96.6422	24.25	0.00715314
Marine_refseq	29529	Chitinophaga_arvensicola	8316369	1730	0	0			0
Marine_refseq	29530	Cytophaga_aurantiaca	4425125	4789	2	0.000417624	94.0594	13.5	0.00427107
Marine_refseq	29533	Flavobacterium_pectinovorum	5610979	11949	0	0			0
Marine_refseq	29534	Flavobacterium_saccharophilum	5209309	3929	0	0			0
Marine_refseq	29536	Flavobacterium_succinicans	3664904	6565	1	0.000152323	94.4444	24	0.00150072
Marine_refseq	29539	Thermoleophilum_album	2207191	799	6	0.00750939	94.3279	15	0.0153589
Marine_refseq	29542	Syntrophotalea_acetylenica	3176363	1318	0	0			0
Marine_refseq	29543	Pelobacter_propionicus	4241119	994	0	0			0
Marine_refseq	29545	Azoarcus_indigens	5464470	733	3	0.00409277	94.7404	18.3333	0.00442861
Marine_refseq	29546	Lawsonia_intracellularis	1719192	8837	1	0.000113161	93.5484	8	0.00366451
Marine_refseq	29549	Rhodothermus_marinus	3386737	2072	1	0.000482625	94.7368	23	0.00283459
Marine_refseq	29552	Haploplasma_axanthum	1883099	5841	4	0.000684814	92.8541	3.75	0.016834
Marine_refseq	29553	Mycoplasmopsis_bovirhinis	922012	4490	0	0			0
Marine_refseq	29554	Metamycoplasma_canadense	693241	3555	0	0			0
Marine_refseq	29555	Mycoplasmopsis_canis	897443	3949	0	0			0
Marine_refseq	29556	Mycoplasmopsis_gallinacea	1074838	3742	0	0			0
Marine_refseq	29557	Mycoplasmopsis_gallinarum	834674	3298	0	0			0
Marine_refseq	29559	Metamycoplasma_hyosynoviae	889181	4280	0	0			0
Marine_refseq	29560	Mycoplasma_imitans	922439	1256	0	0			0
Marine_refseq	29561	Mycoplasmopsis_meleagridis	644173	2961	0	0			0
Marine_refseq	29562	Mesomycoplasma_ovipneumoniae	1081520	9447	1	0.000105854	93.0693	3	0.00943117
Marine_refseq	29563	Halanaerobium_salsuginis	2991186	8684	1	0.000115154	91.4286	3	0.00237364
Marine_refseq	29571	Halomonas_subglaciescola	3110197	1629	3	0.00184162	92.9331	6.33333	0.00861682
Marine_refseq	29575	Taylorella_equigenitalis	1704267	12185	2	0.000164136	91.6141	3	0.00639571
Marine_refseq	29581	Janthinobacterium_lividum	6373589	1639	3	0.00183038	94.3894	15.3333	0.00476968
Marine_refseq	31899	Caldicellulosiruptor_bescii	2931662	1819	0	0			0
Marine_refseq	31909	Halothermothrix_orenii	2578146	4480	0	0			0
Marine_refseq	31910	Halovibrio_variabilis	3729154	1314	22	0.0167428	94.8205	18.6818	0.0527197
Marine_refseq	31958	Amycolatopsis_orientalis	9490992	2133	1	0.000468823	95.0617	24	0.000863977
Marine_refseq	31971	Amedibacillus_dolichus	2191053	1534	0	0			0
Marine_refseq	31973	Eggerthia_catenaformis	1945158	4061	0	0			0
Marine_refseq	31998	Methylobacterium_radiotolerans	6899110	639	71	0.111111	98.5084	37.493	0.0922583
Marine_refseq	32002	Achromobacter_denitrificans	6736870	1045	2	0.00191388	98.3889	42	0.00284999
Marine_refseq	32040	Acidovorax_konjaci	5077528	585	0	0			0
Marine_refseq	32046	Synechococcus_elongatus	2749599	3891	3	0.00077101	92.3759	9.66667	0.00847396
Marine_refseq	32052	Synechococcus_sp._WH_8020	2661166	21188	9806	0.462809	98.342	37.4546	25.8759
Marine_refseq	32053	Thermostichus_vulcanus	3717564	867	7	0.00807382	92.8447	12.2857	0.00772011
Marine_refseq	32056	Dulcicalothrix_desertica	11416284	3794	9	0.00237217	90.4961	2	0.00275922
Marine_refseq	33010	Cutibacterium_avidum	2526138	1047	19	0.0181471	96.5063	28.6842	0.0592604
Marine_refseq	33011	Cutibacterium_granulosum	2179712	1177	376	0.319456	98.6498	38.8644	1.55566
Marine_refseq	33012	Propionimicrobium_lymphophilum	2035623	259	0	0			0
Marine_refseq	33018	Sporolactobacillus_laevolacticus	3590176	1053	0	0			0
Marine_refseq	33025	Phascolarctobacterium_faecium	2454371	4570	0	0			0
Marine_refseq	33028	Staphylococcus_saccharolyticus	2346516	12981	4244	0.326939	98.6957	39.6053	15.2471
Marine_refseq	33029	Anaerococcus_hydrogenalis	1908330	7207	6	0.000832524	99.505	41.6667	0.0276158
Marine_refseq	33030	Peptoniphilus_indolicus	2247968	4057	0	0			0
Marine_refseq	33031	Peptoniphilus_lacrimalis	1883562	2091	1	0.00047824	100	42	0.00557454
Marine_refseq	33032	Anaerococcus_lactolyticus	1936866	3077	1	0.000324992	94.0594	8	0.00526624
Marine_refseq	33033	Parvimonas_micra	1677398	13443	3	0.000223164	96.2989	30	0.0155598
Marine_refseq	33034	Anaerococcus_prevotii	1998633	2848	1	0.000351124	100	42	0.00405277
Marine_refseq	33035	Blautia_producta	6197116	1024	0	0			0
Marine_refseq	33036	Anaerococcus_tetradius	1725895	2675	2	0.000747664	100	42	0.0121676
Marine_refseq	33037	Anaerococcus_vaginalis	1893964	5149	0	0			0
Marine_refseq	33038	#NAME?	3549191	4767	1	0.000209776	93.8144	8	0.00276119
Marine_refseq	33039	#NAME?	2979783	1964	4	0.00203666	99.505	24	0.0105041
Marine_refseq	33043	Coprococcus_eutactus	3112919	2193	31	0.0141359	99.8612	42	0.0826877
Marine_refseq	33044	Bartonella_doshiae	1844489	8856	4	0.000451671	92.2571	5.5	0.0137708
Marine_refseq	33045	Bartonella_grahamii	2369520	5338	2	0.000374672	97	4.5	0.00565515
Marine_refseq	33046	Bartonella_taylorii	1948309	5222	2	0.000382995	93.0693	5.5	0.00554327
Marine_refseq	33047	Bartonella_vinsonii	1995085	21539	0	0			0
Marine_refseq	33049	Phaeovulum_veldkampii	3268293	1207	40	0.03314	95.1295	20.425	0.0944224
Marine_refseq	33050	Sphingopyxis_macrogoltabida	5748623	2727	148	0.0542721	95.8323	20.1757	0.168997
Marine_refseq	33051	Sphingomonas_sanguinis	4053092	2715	15	0.00552486	94.2857	16.8667	0.029459
Marine_refseq	33052	Sphingopyxis_terrae	3570894	1157	19	0.0164218	96.8772	33.8947	0.0481672
Marine_refseq	33053	Neisseria_perflava	2266113	821	0	0			0
Marine_refseq	33056	Candidatus_Kinetoplastibacterium_crithidii	821930	9231	1	0.000108331	93.2692	8	0.0127748
Marine_refseq	33059	Acidithiobacillus_caldus	3237599	1120	1	0.000892857	92.1569	3	0.00160613
Marine_refseq	33060	Yersinia_mollaretii	4603534	1943	0	0			0
Marine_refseq	33069	Pseudomonas_viridiflava	6093513	13647	4	0.000293105	92.3094	3	0.00380733
Marine_refseq	33070	Thermostichus_lividus	2659739	944	1	0.00105932	93	2	0.00379737
Marine_refseq	33072	Gloeobacter_violaceus	4659019	480	0	0			0
Marine_refseq	33074	Zymobacter_palmae	3028543	1157	7	0.00605013	97.5052	1	0.0198775
Marine_refseq	33075	Acidobacterium_capsulatum	4127356	588	0	0			0
Marine_refseq	33865	Methanoplanus_endosymbiosus	3163021	638	1	0.0015674	93.5897	8	0.00249761
Marine_refseq	33871	Coriobacterium_glomerans	2115681	279	1	0.00358423	94.0594	2	0.00482114
Marine_refseq	33876	Catenuloplanes_japonicus	10971538	1591	1	0.000628536	96.2963	24	0.000501297
Marine_refseq	33878	Agromyces_cerinus	4187509	793	0	0			0
Marine_refseq	33879	Agromyces_ramosus	3838279	597	1	0.00167504	94.0594	8	0.00265744
Marine_refseq	33881	Curtobacterium_luteum	3620063	589	0	0			0
Marine_refseq	33884	Microbacterium_imperiale	3082772	606	10	0.0165017	92.9995	10	0.0204686
Marine_refseq	33885	Microbacterium_lacticum	3086904	1901	156	0.0820621	98.3088	20.4487	0.209466
Marine_refseq	33887	Rathayibacter_rathayi	3103889	510	0	0			0
Marine_refseq	33889	Brevibacterium_casei	3960094	4536	431	0.0950176	96.0295	25.7378	0.989699
Marine_refseq	33897	Streptomyces_bluensis	9022007	636	0	0			0
Marine_refseq	33898	Streptomyces_galbus	7836436	767	0	0			0
Marine_refseq	33900	Streptomyces_murinus	8349858	438	0	0			0
Marine_refseq	33904	Streptomyces_mashuensis	7237780	1064	0	0			0
Marine_refseq	33906	Actinopolyspora_mortivallis	4233350	904	1	0.00110619	91.9192	3	0.0023622
Marine_refseq	33910	Amycolatopsis_mediterranei	10236779	676	0	0			0
Marine_refseq	33914	Saccharopolyspora_gregorii	6344421	396	2	0.00505051	91.2662	3	0.00110333
Marine_refseq	33919	Saccharothrix_coeruleofusca	7778610	1503	0	0			0
Marine_refseq	33922	Mycoplasmopsis_agassizii	1274972	4240	0	0			0
Marine_refseq	33923	Mycoplasmopsis_felis	958349	5069	0	0			0
Marine_refseq	33924	Mycoplasma_testudinis	1325910	2265	0	0			0
Marine_refseq	33932	Sutcliffiella_cohnii	4899141	4658	0	0			0
Marine_refseq	33934	Anoxybacillus_flavithermus	2846746	2204	4	0.00181488	93.0639	8	0.0131378
Marine_refseq	33935	Lysinibacillus_macroides	4862621	3271	0	0			0
Marine_refseq	33936	Aeribacillus_pallidus	3903800	1628	2	0.0012285	98.5149	42	0.00420103
Marine_refseq	33943	Kyrpidia_tusciae	3384766	383	0	0			0
Marine_refseq	33945	Enterococcus_avium	4537641	3271	0	0			0
Marine_refseq	33946	Kurthia_gibsonii	2778614	1209	0	0			0
Marine_refseq	33952	Acetobacterium_woodii	4044777	3231	0	0			0
Marine_refseq	33953	Clostridium_aminobutyricum	3219148	2491	0	0			0
Marine_refseq	33954	Clostridium_magnum	6472246	9570	0	0			0
Marine_refseq	33959	Lactobacillus_johnsonii	1951416	5933	0	0			0
Marine_refseq	33960	Secundilactobacillus_collinoides	3616190	702	0	0			0
Marine_refseq	33962	Lentilactobacillus_kefiri	2489034	842	0	0			0
Marine_refseq	33964	Leuconostoc_citreum	1903250	1846	0	0			0
Marine_refseq	33968	Leuconostoc_pseudomesenteroides	2114657	1562	0	0			0
Marine_refseq	33970	Melissococcus_plutonius	2067831	3954	0	0			0
Marine_refseq	33977	Caryophanon_latum	3590595	1341	0	0			0
Marine_refseq	33978	Caryophanon_tenue	3340962	2033	0	0			0
Marine_refseq	33984	Luteococcus_japonicus	3452849	638	13	0.0203762	95.1646	24.8462	0.00558959
Marine_refseq	33987	Exiguobacterium_aurantiacum	3037601	678	1	0.00147493	96.0526	24	0.0025349
Marine_refseq	33989	Rickettsia_amblyommatis	1456213	1446	95	0.0656985	94.8163	20.0526	0.0260264
Marine_refseq	33990	Rickettsia_bellii	1522076	5399	0	0			0
Marine_refseq	33991	Rickettsia_montanensis	1279798	673	6	0.0089153	93.5901	11.5	0.00578216
Marine_refseq	33992	Rickettsia_rhipicephali	1305467	611	1	0.00163666	98.0198	42	0.0078133
Marine_refseq	33994	Neorickettsia_helminthoeca	884232	4675	3	0.000641711	92.404	3	0.0303088
Marine_refseq	33995	Komagataeibacter_europaeus	3797909	810	0	0			0
Marine_refseq	33996	Gluconacetobacter_diazotrophicus	3914947	1478	2	0.00135318	93.9563	16	0.00447005
Marine_refseq	33998	Acidocella_aminolytica	3964820	1319	4	0.0030326	94.6402	5	0.00640634
Marine_refseq	34002	Paracoccus_alcaliphilus	4772712	3420	269	0.078655	96.0715	23.8773	0.29589
Marine_refseq	34003	Paracoccus_aminophilus	4873118	1839	11	0.00598151	95.0483	13.3636	0.0179146
Marine_refseq	34004	Paracoccus_aminovorans	4038130	2063	58	0.0281144	95.1513	21.7241	0.113245
Marine_refseq	34006	Paracoccus_thiocyanatus	3524418	1566	87	0.0555556	96.3228	26.0805	0.132816
Marine_refseq	34007	Paracoccus_versutus	4969440	838	78	0.0930788	97.1362	30.5769	0.121201
Marine_refseq	34010	Azospirillum_halopraeferens	6512377	2217	10	0.0045106	93.5293	13.9	0.0105799
Marine_refseq	34011	Niveispirillum_irakense	5455784	1545	2	0.0012945	92.9146	5.5	0.00306097
Marine_refseq	34015	Blastomonas_natatoria	4045865	1085	81	0.0746544	97.4799	33.5926	0.172893
Marine_refseq	34017	Rhodobium_orientis	5189386	2375	293	0.123368	95.9592	26.3208	0.269454
Marine_refseq	34018	Rhodospirillum_centenum	4355543	1486	4	0.00269179	93.6585	10.5	0.00493624
Marine_refseq	34020	Candidatus_Liberibacter_africanus	1192232	9001	2	0.000222198	96.0396	1.5	0.0171108
Marine_refseq	34021	Candidatus_Liberibacter_asiaticus	1230251	9638	7	0.000726292	98.0549	1	0.0343019
Marine_refseq	34022	Candidatus_Liberibacter_sp.	1408989	12552	5	0.000398343	93.7816	12.8	0.0160399
Marine_refseq	34027	Aromatoleum_tolulyticum	5110391	607	0	0			0
Marine_refseq	34029	Leptothrix_cholodnii	4909403	832	2	0.00240385	94.0594	8	0.00370717
Marine_refseq	34031	Desulfobacter_vibrioformis	4466775	1322	22	0.0166415	95.8157	27.1818	0.0227009
Marine_refseq	34032	Desulfobulbus_rhabdoformis	5266585	2297	5	0.00217675	95.5432	20.6	0.00655073
Marine_refseq	34038	Rahnella_aquatilis	5448900	1055	0	0			0
Marine_refseq	34058	Methylobacter_marinus	4988792	348	0	0			0
Marine_refseq	34059	Moraxella_atlantae	2501639	2383	46	0.0193034	96.477	10.1087	0.0325786
Marine_refseq	34060	Moraxella_caviae	2736043	1692	0	0			0
Marine_refseq	34061	Moraxella_cuniculi	2202865	2868	3	0.00104603	99.0099	1	0.0128015
Marine_refseq	34062	Moraxella_osloensis	2649137	12492	641	0.0513128	96.7479	22.9204	1.47795
Marine_refseq	34068	Cycloclasticus_pugetii	2383924	1767	17	0.00962083	96.4888	29.0588	0.0627956
Marine_refseq	34071	Telluria_mixta	7444617	565	0	0			0
Marine_refseq	34073	Variovorax_paradoxus	7079721	5521	8	0.00144901	94.7375	16	0.00913878
Marine_refseq	34078	Scytonema_hofmannii	12294410	3569	44	0.0123284	90.3664	2.61364	0.00274108
Marine_refseq	34085	Riemerella_anatipestifer	2155121	16856	1	5.93261e-05	92.4528	3	0.00250566
Marine_refseq	34086	Pedobacter_antarcticus	4422181	4363	0	0			0
Marine_refseq	34087	Sphingobacterium_faecium	5296794	6101	1	0.000163908	92.1875	3	0.00122716
Marine_refseq	34090	Pelodictyon_phaeoclathratiforme	3018238	1450	0	0			0
Marine_refseq	34095	Borreliella_japonica	1017684	1257	0	0			0
Marine_refseq	34097	Brevinema_andersonii	1501400	3243	5	0.00154178	93.0129	13	0.0165845
Marine_refseq	34101	Sporosarcina_limicola	4301636	2098	0	0			0
Marine_refseq	34103	Sphaerotilus_natans	4630083	737	0	0			0
Marine_refseq	34105	Streptobacillus_moniliformis	1673280	6141	0	0			0
Marine_refseq	35554	Geobacter_sulfurreducens	3814128	1096	0	0			0
Marine_refseq	35619	Streptomyces_griseoflavus	7580440	606	0	0			0
Marine_refseq	35620	Streptomyces_hirsutus	8843894	971	0	0			0
Marine_refseq	35621	Streptomyces_mobaraensis	7668063	906	0	0			0
Marine_refseq	35622	Thermostaphylospora_chromogena	5988017	921	1	0.00108578	92.0792	3	0.0017034
Marine_refseq	35623	Acholeplasma_oculi	1600576	3598	0	0			0
Marine_refseq	35700	Heliophilum_fasciatum	3142229	1325	0	0			0
Marine_refseq	35701	Heliomicrobium_modesticaldum	3075407	930	1	0.00107527	95.6989	8	0.00302399
Marine_refseq	35703	Citrobacter_amalonaticus	5071999	2695	0	0			0
Marine_refseq	35751	Sporichthya_polymorpha	5500153	1763	1	0.000567215	93.9394	8	0.00181813
Marine_refseq	35752	Actinoplanes_philippinensis	10381230	1322	0	0			0
Marine_refseq	35754	Dactylosporangium_aurantiacum	11523879	2211	1	0.000452284	91.358	3	0.000711566
Marine_refseq	35755	Corynebacterium_kutscheri	2354065	943	0	0			0
Marine_refseq	35756	Corynebacterium_pilosum	2593653	334	0	0			0
Marine_refseq	35757	Corynebacterium_cystitidis	3011567	709	0	0			0
Marine_refseq	35761	Nocardioides_sp.	4665855	1236	25	0.0202265	93.6385	12.04	0.0418358
Marine_refseq	35762	Planobispora_rosea	8559326	1101	0	0			0
Marine_refseq	35763	Acrocarpospora_corrugata	9271625	1314	1	0.000761035	92	3	0.00108935
Marine_refseq	35768	Mycoplasmopsis_felifaucium	764934	1931	0	0			0
Marine_refseq	35773	Candidatus_Phytoplasma_luffae	769143	1478	0	0			0
Marine_refseq	35786	Coprothermobacter_proteolyticus	1424912	3075	2	0.000650407	91.623	2.5	0.0108077
Marine_refseq	35787	Limosilactobacillus_pontis	1714771	573	0	0			0
Marine_refseq	35789	Rickettsia_helvetica	1419877	345	0	0			0
Marine_refseq	35790	Rickettsia_japonica	1283087	437	0	0			0
Marine_refseq	35793	Rickettsia_sibirica	1250021	516	1	0.00193798	94.0594	23	0.00815986
Marine_refseq	35794	Rickettsia_slovaca	1275089	322	0	0			0
Marine_refseq	35795	Ehrlichia_muris	1196717	3263	0	0			0
Marine_refseq	35797	Nitrococcus_mobilis	3623681	1796	36	0.0200445	94.7007	18.8611	0.0599666
Marine_refseq	35799	Nitrosospira_briensis	3210113	1889	0	0			0
Marine_refseq	35801	Nitrospina_gracilis	3077713	6180	323	0.0522654	93.7427	12.582	0.0569904
Marine_refseq	35804	Rhodovulum_adriaticum	3350627	1292	43	0.0332817	96.0932	26.3953	0.0813878
Marine_refseq	35805	Rhodovulum_euryhalinum	3789126	1139	32	0.0280948	93.938	14.4375	0.0548675
Marine_refseq	35806	Rhodovulum_sulfidophilum	4347929	3825	75	0.0196078	95.4728	21.8	0.083465
Marine_refseq	35811	Erythrobacter_ramosus	3342622	1904	38	0.019958	93.4	11.1053	0.0924723
Marine_refseq	35813	Roseococcus_thiosulfatophilus	4091248	551	0	0			0
Marine_refseq	35814	Bordetella_holmesii	3688120	1294	2	0.0015456	94.8794	2	0.00447382
Marine_refseq	35817	Helicobacter_heilmannii	1638988	673	0	0			0
Marine_refseq	35818	Helicobacter_pullorum	1733410	9094	1	0.000109963	93.0693	3	0.00588436
Marine_refseq	35825	Pseudobacteroides_cellulosolvens	6878816	5905	1	0.000169348	92.3077	3	0.000770481
Marine_refseq	35830	Acetivibrio_cellulolyticus	6156735	6199	0	0			0
Marine_refseq	35833	Bilophila_wadsworthia	4391194	474	0	0			0
Marine_refseq	35835	Hydrogenobacter_hydrogenophilus	1601489	2375	0	0			0
Marine_refseq	35837	Desulfacinum_infernum	4239823	1037	1	0.00096432	95.3125	3	0.00153308
Marine_refseq	35839	Holophaga_foetida	4127237	1122	1	0.000891266	94.0594	8	0.00247139
Marine_refseq	35841	Caldibacillus_thermoamylovorans	3707071	1251	0	0			0
Marine_refseq	36740	Dermabacter_hominis	2155270	603	0	0			0
Marine_refseq	36742	Mycoplasma_leonicaptivi	901123	2406	0	0			0
Marine_refseq	36744	Mycoplasma_simbae	852572	4772	0	0			0
Marine_refseq	36745	Clostridium_saccharoperbutylacetonicum	6666445	5423	0	0			0
Marine_refseq	36746	Pseudomonas_cichorii	5984143	5023	15	0.00298626	94.0313	13.4	0.0179641
Marine_refseq	36805	Microbacterium_aurum	3424892	2391	455	0.190297	96.3547	27.9956	0.346055
Marine_refseq	36806	Microbacterium_dextranolyticum	3181200	506	30	0.0592885	97.1047	31.9	0.0434113
Marine_refseq	36807	Microbacterium_laevaniformans	3031132	642	127	0.197819	96.7689	31.7953	0.188675
Marine_refseq	36808	Corynebacterium_bovis	2666089	875	0	0			0
Marine_refseq	36809	Mycobacteroides_abscessus	5090491	4523	9	0.00198983	96.4189	29.8889	0.0159513
Marine_refseq	36811	Mycolicibacterium_agri	7297392	934	12	0.012848	95.0341	22.8333	0.0144572
Marine_refseq	36812	Mycobacterium_genavense	4936071	532	1	0.0018797	92.0792	3	0.00206642
Marine_refseq	36813	Mycolicibacterium_pulveris	5484749	540	6	0.0111111	95.5215	18.5	0.00944437
Marine_refseq	36814	Mycolicibacterium_rhodesiae	6009003	1826	9	0.00492881	96.4424	29.5556	0.0141954
Marine_refseq	36818	Streptomyces_subrutilus	7604974	1988	0	0			0
Marine_refseq	36819	Amycolatopsis_azurea	9217912	460	0	0			0
Marine_refseq	36820	Gordonia_aichiensis	5092029	428	5	0.0116822	95.8416	23.4	0.00875879
Marine_refseq	36821	Gordonia_amarae	5289363	582	1	0.00171821	100	42	0.00111545
Marine_refseq	36822	Gordonia_rubripertincta	5263177	813	65	0.0799508	97.8799	35.1692	0.0911047
Marine_refseq	36832	Lacrimispora_aerotolerans	4732373	1700	0	0			0
Marine_refseq	36834	Clostridium_celatum	3639821	9331	0	0			0
Marine_refseq	36835	#NAME?	2035557	8212	1	0.000121773	91.7808	3	0.00363537
Marine_refseq	36839	Clostridium_felsineum	5242194	2471	0	0			0
Marine_refseq	36841	Terrisporobacter_glycolicus	4060596	12884	1	7.76156e-05	92.9825	8	0.00142836
Marine_refseq	36842	Maledivibacter_halophilus	5802910	11454	0	0			0
Marine_refseq	36844	Clostridium_homopropionicum	3644832	10955	2	0.000182565	93.6874	13.5	0.00400567
Marine_refseq	36845	Clostridium_intestinale	4686421	9360	1	0.000106838	92.3077	3	0.00224052
Marine_refseq	36847	Anaerotignum_neopropionicum	3194881	2493	2	0.000802246	93.7739	15.5	0.00356821
Marine_refseq	36849	Oxobacter_pfennigii	4510552	3610	2	0.000554017	92.8483	13	0.00157409
Marine_refseq	36856	Sinorhizobium_saheli	5994348	619	0	0			0
Marine_refseq	36861	Thiobacillus_denitrificans	3609948	2225	18	0.00808989	93.6306	12.7222	0.0177011
Marine_refseq	36863	Ideonella_dechloratans	4544016	568	3	0.00528169	94.2507	13.3333	0.00486354
Marine_refseq	36873	Paraburkholderia_xenovorans	9731138	679	7	0.0103093	99.1485	1	0.00589859
Marine_refseq	36874	Porphyromonas_cangingivalis	2404857	4120	7	0.00169903	95.8967	15.1429	0.0177142
Marine_refseq	37326	Nocardia_brasiliensis	8935513	2643	1	0.000378358	94.0594	2	0.00114151
Marine_refseq	37327	Nocardia_brevicatena	7007170	644	0	0			0
Marine_refseq	37328	Nocardia_carnea	7492940	553	0	0			0
Marine_refseq	37329	Nocardia_farcinica	6292344	1060	1	0.000943396	100	42	0.00162102
Marine_refseq	37330	Nocardia_nova	7959976	2022	0	0			0
Marine_refseq	37331	Pseudonocardia_petroleophila	6490139	1287	1	0.000777001	100	42	0.00155621
Marine_refseq	37332	Nocardia_seriolae	8134318	895	1	0.00111732	93.1507	8	0.000909726
Marine_refseq	37333	Nocardia_transvalensis	8398323	1753	0	0			0
Marine_refseq	37372	Helicobacter_bilis	2559659	3533	0	0			0
Marine_refseq	37448	Polaromonas_vacuolata	3837686	1190	0	0			0
Marine_refseq	37482	Laceyella_sacchari	3383707	781	0	0			0
Marine_refseq	37487	Marichromatium_purpuratum	3779112	622	2	0.00321543	92.5347	3	0.0029372
Marine_refseq	37625	Desulfuromusa_kysingii	3744894	4654	3	0.000644607	93.3531	13	0.00678257
Marine_refseq	37633	Kineococcus_aurantiacus	5027298	1150	3	0.0026087	95.7096	24.6667	0.00431643
Marine_refseq	37636	Thermus_scotoductus	2070699	342	0	0			0
Marine_refseq	37637	Corynebacterium_pseudodiphtheriticum	2261008	393	6	0.0152672	96.1587	27.3333	0.0223352
Marine_refseq	37658	#NAME?	4222819	5350	1	0.000186916	91.9355	3	0.00149189
Marine_refseq	37659	Clostridium_algidicarnis	3060291	12510	0	0			0
Marine_refseq	37692	Candidatus_Phytoplasma_mali	601943	1683	0	0			0
Marine_refseq	37734	Enterococcus_casseliflavus	3427276	5619	0	0			0
Marine_refseq	37752	Flavobacterium_hibernum	5283672	4314	0	0			0
Marine_refseq	37916	Mycolicibacterium_chlorophenolicum	7330216	2066	730	0.35334	99.2368	40.2863	0.604375
Marine_refseq	37919	Rhodococcus_opacus	9166298	2424	3	0.00123762	95.296	9.33333	0.00278193
Marine_refseq	37921	Arthrobacter_agilis	3786308	986	0	0			0
Marine_refseq	37923	Rothia_kristinae	2377741	940	23	0.0244681	97.8047	35.6957	0.0811695
Marine_refseq	37925	Thermocrispum_agreste	4196086	816	20	0.0245098	99.2569	41.9	0.0255238
Marine_refseq	37926	Thermocrispum_municipale	4526423	812	3	0.00369458	95.6667	24.3333	0.00472779
Marine_refseq	37927	Sinomonas_atrocyanea	4492204	986	0	0			0
Marine_refseq	37928	Arthrobacter_crystallopoietes	5032705	1886	1	0.000530223	93.3333	8	0.00180817
Marine_refseq	37931	Paenarthrobacter_ureafaciens	4724281	533	1	0.00187617	96	1	0.00213789
Marine_refseq	38023	Methanolobus_bombayensis	3122090	1394	0	0			0
Marine_refseq	38026	Methanolobus_vulcani	2947907	2530	0	0			0
Marine_refseq	38027	Methanosarcina_siciliae	5017558	1327	0	0			0
Marine_refseq	38284	Corynebacterium_accolens	2465625	312	4	0.0128205	95.9922	23.75	0.0158175
Marine_refseq	38286	Corynebacterium_afermentans	2353801	398	9	0.0226131	96.8211	28.7778	0.0353896
Marine_refseq	38289	Corynebacterium_jeikeium	2524840	891	2	0.00224467	94.7235	23.5	0.00530727
Marine_refseq	38290	Corynebacterium_macginleyi	2493537	563	0	0			0
Marine_refseq	38293	Photobacterium_damselae	4498533	14908	20	0.00134156	98.6649	17.3	0.038946
Marine_refseq	38300	Streptomyces_pristinaespiralis	8112061	659	0	0			0
Marine_refseq	38304	Corynebacterium_tuberculostearicum	2451854	311	47	0.151125	97.0171	31.5745	0.177988
Marine_refseq	38305	Corynebacterium_vitaeruminis	2931780	695	0	0			0
Marine_refseq	38307	Gluconobacter_cerinus	3467487	2087	0	0			0
Marine_refseq	38308	Gluconobacter_frateurii	3309380	1186	1	0.00084317	93.4211	8	0.00232672
Marine_refseq	38310	Rhodococcus_coprophilus	4579834	497	0	0			0
Marine_refseq	38311	Rhodococcus_marinonascens	4924407	530	1	0.00188679	94.0594	23	0.00207132
Marine_refseq	38312	Rhodococcus_rhodnii	4491802	742	2	0.00269542	92.5396	3	0.00451934
Marine_refseq	38313	Shewanella_algae	4924764	5875	15	0.00255319	97.1737	31.7333	0.0296258
Marine_refseq	38323	Bartonella_henselae	1946727	4983	0	0			0
Marine_refseq	38402	Erysipelothrix_tonsillarum	1931022	1521	0	0			0
Marine_refseq	38502	Blastococcus_aggregatus	4620309	848	16	0.0188679	97.3176	28.375	0.0319892
Marine_refseq	38815	Desulfuromonas_acetexigens	3683125	1104	34	0.0307971	98.2626	3.55882	0.0243815
Marine_refseq	38875	Heyndrickxia_oleronia	5371064	5183	0	0			0
Marine_refseq	38986	Alteracholeplasma_palmae	1554229	4386	1	0.000227998	92.0792	3	0.00656274
Marine_refseq	39029	Megasphaera_cerevisiae	3152696	1560	0	0			0
Marine_refseq	39047	Mycoplasmopsis_sturni	813344	1548	0	0			0
Marine_refseq	39060	Desulfoscipio_geothermicus	3652244	1218	0	0			0
Marine_refseq	39122	Skermania_piniformis	4230116	649	0	0			0
Marine_refseq	39152	Methanococcus_maripaludis	1714918	10114	0	0			0
Marine_refseq	39441	Methanobrevibacter_arboriphilus	2445031	8674	0	0			0
Marine_refseq	39480	Andreesenia_angusta	2343503	1761	0	0			0
Marine_refseq	39481	Clostridium_combesii	3892013	378	0	0			0
Marine_refseq	39482	Faecalicatena_contorta	5055003	6178	0	0			0
Marine_refseq	39483	Faecalitalea_cylindroides	1882013	5445	0	0			0
Marine_refseq	39485	Lachnospira_eligens	2831389	7408	1	0.000134989	100	42	0.00360247
Marine_refseq	39486	Dorea_formicigenerans	3188304	3794	0	0			0
Marine_refseq	39487	Atopobium_fossor	1657369	925	0	0			0
Marine_refseq	39488	Anaerobutyricum_hallii	3455681	4019	6	0.00149291	98.8449	39	0.0171312
Marine_refseq	39489	Clostridium_moniliforme	2605467	6910	3	0.000434153	92.3091	4.66667	0.00418351
Marine_refseq	39490	Eubacterium_ramulus	3378009	1546	5	0.00323415	97.6699	9.2	0.00677914
Marine_refseq	39493	Clostridium_tarantellae	3979886	12607	1	7.9321e-05	94.0476	23	0.00213574
Marine_refseq	39495	Eubacterium_uniforme	2872342	7911	0	0			0
Marine_refseq	39496	Eubacterium_ventriosum	2761423	6847	3	0.000438148	99.359	42	0.00840147
Marine_refseq	39497	Eubacterium_xylanophilum	2579248	1672	0	0			0
Marine_refseq	39645	Mesorhizobium_ciceri	6880454	483	1	0.00207039	96.0396	24	0.00148246
Marine_refseq	39650	Cellvibrio_mixtus	4773886	4166	1	0.000240038	98.9474	42	0.00201094
Marine_refseq	39669	Methanosalsum_zhilinae	2138444	1216	0	0			0
Marine_refseq	39687	Mycolicibacterium_austroafricanum	6287627	1453	108	0.074329	97.2996	31.8889	0.14212
Marine_refseq	39688	Mycolicibacterium_duvalii	5657388	1504	201	0.133644	95.2891	23.0348	0.266696
Marine_refseq	39691	Mycolicibacterium_moriokaense	6225779	2597	31	0.0119369	95.4802	23.4194	0.0382442
Marine_refseq	39692	Mycolicibacterium_parafortuitum	6044196	1786	26	0.0145577	93.9881	15.0769	0.0350253
Marine_refseq	39694	Mycolicibacterium_poriferae	5929171	48176	31710	0.658212	98.5533	37.5038	33.2756
Marine_refseq	39695	Mycolicibacterium_tokaiense	6328149	1837	2	0.00108873	92.5347	5.5	0.00320789
Marine_refseq	39765	Hydrogenovibrio_crunogenus	2453259	5033	7	0.00139082	99.2798	35.8571	0.0275144
Marine_refseq	39766	Sulfurimonas_denitrificans	2201561	3994	1	0.000250376	92.1569	3	0.00236196
Marine_refseq	39768	Blattabacterium_sp._-Mastotermes_darwiniensis-	590336	2695	0	0			0
Marine_refseq	39774	Methylomicrobium_agile	4526071	601	0	0			0
Marine_refseq	39777	Veillonella_atypica	2071607	2251	4	0.00177699	97.0457	29	0.0200328
Marine_refseq	39778	Veillonella_dispar	2116915	780	6	0.00769231	97.2256	32.3333	0.0268315
Marine_refseq	39841	Thermodesulforhabdus_norvegica	2808342	1900	7	0.00368421	94.3577	17.8571	0.0192996
Marine_refseq	39844	Mesorhizobium_tianshanense	7864668	511	3	0.00587084	92.4787	4.66667	0.00376367
Marine_refseq	39950	Dialister_pneumosintes	1247407	2965	2	0.000674536	99.5	42	0.0142696
Marine_refseq	39956	Methylobacterium_mesophilicum	5902708	870	2	0.00229885	93.0198	13	0.00286309
Marine_refseq	39960	Erythrobacter_litoralis	3251353	12175	130	0.0106776	93.7011	12.8308	0.295908
Marine_refseq	39962	Legionella_moravica	3825910	2636	0	0			0
Marine_refseq	40091	Helcococcus_kunzii	2096464	6293	0	0			0
Marine_refseq	40137	Afipia_carboxidovorans	3896074	835	14	0.0167665	94.2225	15.7857	0.0137061
Marine_refseq	40214	Acinetobacter_johnsonii	3540498	8651	280	0.0323662	96.678	30.6036	0.751787
Marine_refseq	40215	Acinetobacter_junii	3438557	7389	79	0.0106916	97.5888	35.5823	0.212996
Marine_refseq	40216	Acinetobacter_radioresistens	3089777	3058	4	0.00130804	98.7624	21.5	0.00890032
Marine_refseq	40269	Aliivibrio_salmonicida	4655660	2588	2	0.000772798	93.5644	8	0.00367295
Marine_refseq	40324	Stenotrophomonas_maltophilia	5004261	11930	107	0.00896899	95.6108	23.2897	0.179567
Marine_refseq	40335	Legionella_tucsonensis	3357159	4697	3	0.000638706	95.2255	22.6667	0.00786379
Marine_refseq	40414	Desulforhopalus_vacuolatus	3830687	2348	27	0.0114991	93.1391	8.07407	0.0323702
Marine_refseq	40516	Gordonia_hydrophobica	4632341	941	1	0.0010627	92.7273	3	0.00120889
Marine_refseq	40518	Ruminococcus_bromii	1849782	2393	0	0			0
Marine_refseq	40519	Ruminococcus_callidus	3165429	613	0	0			0
Marine_refseq	40520	Blautia_obeum	3649956	3430	1	0.000291545	100	42	0.00279455
Marine_refseq	40542	Leptotrichia_buccalis	2465610	2898	3	0.0010352	99.0099	42	0.0126946
Marine_refseq	40543	Sneathia_sanguinegens	1259487	6342	2	0.000315358	93.479	15.5	0.00865432
Marine_refseq	40545	Sutterella_wadsworthensis	3026517	1473	0	0			0
Marine_refseq	40571	Lentzea_albidocapillata	8639486	914	0	0			0
Marine_refseq	40575	Clostridium_grantii	4474501	11407	1	8.76655e-05	94.6429	24	0.00127389
Marine_refseq	40576	Xenorhabdus_bovienii	4674198	5711	0	0			0
Marine_refseq	40577	Xenorhabdus_poinarii	3659523	1386	0	0			0
Marine_refseq	40578	Xenorhabdus_beddingii	4096854	1562	0	0			0
Marine_refseq	40681	Sphingomonas_asaccharolytica	4608803	682	11	0.016129	92.2392	7.09091	0.0180307
Marine_refseq	40682	Sphingomonas_mali	5228377	1028	40	0.0389105	94.2678	18.8	0.0461329
Marine_refseq	40683	Sphingomonas_pruni	4482342	1033	31	0.0300097	94.1993	17.8065	0.0277533
Marine_refseq	40834	Borrelia_duttonii	1574881	333	0	0			0
Marine_refseq	40835	Borrelia_hispanica	1783846	1191	0	0			0
Marine_refseq	40841	Succiniclasticum_ruminis	2539887	1655	1	0.00060423	96.0396	24	0.00401593
Marine_refseq	40983	Geobacter_hydrogenophilus	4043428	771	0	0			0
Marine_refseq	40988	Saccharomonospora_azurea	4763852	849	0	0			0
Marine_refseq	40989	Saccharomonospora_cyanea	5408301	716	0	0			0
Marine_refseq	40990	Saccharomonospora_glauca	4564108	515	1	0.00194175	94.5055	23	0.00201573
Marine_refseq	41170	Exiguobacterium_acetylicum	3396606	997	0	0			0
Marine_refseq	41202	Ewingella_americana	4910581	2383	2	0.000839278	96.1111	22.5	0.00399138
Marine_refseq	41276	Brevundimonas_vesicularis	3345527	735	30	0.0408163	97.7343	34.4333	0.0791804
Marine_refseq	41673	Acidianus_brierleyi	2947244	4662	0	0			0
Marine_refseq	41675	Stygiolobus_azoricus	1987069	848	0	0			0
Marine_refseq	41899	Burkholderia_plantarii	8081051	1342	0	0			0
Marine_refseq	41950	Candidatus_Microthrix_parvicella	4211496	8956	553	0.0617463	95.9021	27.3056	0.0927461
Marine_refseq	41976	Porphyromonas_catoniae	2040170	689	0	0			0
Marine_refseq	41977	Azoarcus_communis	5004685	2937	4	0.00136193	95.1871	19	0.00785264
Marine_refseq	41986	Agromyces_mediolanus	3861601	1611	2	0.00124146	92.5743	5.5	0.00383261
Marine_refseq	41988	Cryobacterium_psychrophilum	3677616	441	3	0.00680272	95.0926	23.6667	0.0048129
Marine_refseq	41997	Enterococcus_saccharolyticus	2622437	1986	0	0			0
Marine_refseq	42055	Chromohalobacter_marismortui	3553220	756	42	0.0555556	95.4127	21.9524	0.103146
Marine_refseq	42092	Ureaplasma_canigenitalium	835388	879	0	0			0
Marine_refseq	42094	Ureaplasma_diversum	973501	3042	0	0			0
Marine_refseq	42197	Actinosynnema_pretiosum	8131572	2062	0	0			0
Marine_refseq	42233	Spirilliplanes_yamanashiensis	6544939	1369	1	0.00073046	94.7368	23	0.000886181
Marine_refseq	42234	Streptomyces_acidiscabies	11002003	1110	5	0.0045045	97.2112	1	0.00319942
Marine_refseq	42236	Streptomyces_diastatochromogenes	10520052	519	0	0			0
Marine_refseq	42238	Streptomyces_neyagawaensis	9979945	483	0	0			0
Marine_refseq	42253	Nitrospira_moscoviensis	4589485	1145	0	0			0
Marine_refseq	42256	Rubrobacter_radiotolerans	3398074	929	5	0.00538213	92.7554	4	0.00644483
Marine_refseq	42322	Eubacterium_ruminantium	2841101	2174	2	0.000919963	92.4147	3	0.00517405
Marine_refseq	42354	Nitrosomonas_oligotropha	3119926	5252	23	0.00437928	93.7159	11.2174	0.00759633
Marine_refseq	42422	Halobacteroides_halobius	2649255	8217	10	0.00121699	91.1129	4.9	0.00600169
Marine_refseq	42443	Roseobacter_litoralis	4745450	5588	58	0.0103794	94.8375	17.4655	0.0642299
Marine_refseq	42444	Marinovum_algicola	5396756	2528	164	0.0648734	95.813	24.0305	0.217909
Marine_refseq	42471	Desulfofundulus_thermocisternus	2654868	730	0	0			0
Marine_refseq	42565	Halomonas_salina	3529351	439	2	0.00455581	93.5806	13	0.00464675
Marine_refseq	42566	Halomonas_eurihalina	3842566	723	6	0.00829876	93.2909	8.83333	0.0132464
Marine_refseq	42684	Streptomyces_collinus	8867154	611	0	0			0
Marine_refseq	42817	Corynebacterium_argentoratense	2031902	678	0	0			0
Marine_refseq	42838	Ammonifex_degensii	2157067	772	0	0			0
Marine_refseq	42858	Mammaliicoccus_lentus	2802382	4465	0	0			0
Marine_refseq	42862	Rickettsia_felis	1579101	1323	2	0.00151172	98.4845	42	0.0127288
Marine_refseq	42879	Methanococcus_aeolicus	1569500	2594	0	0			0
Marine_refseq	42881	Streptomyces_chromofuscus	7483282	661	0	0			0
Marine_refseq	42906	Serratia_entomophila	5147822	758	0	0			0
Marine_refseq	43057	Cereibacter_azotoformans	4442977	440	0	0			0
Marine_refseq	43080	Sulfolobus_islandicus	2586647	4409	0	0			0
Marine_refseq	43131	Tissierella_praeacuta	3206559	10025	1	9.97506e-05	94.4444	24	0.00171523
Marine_refseq	43263	Pseudomonas_alcaligenes	4406305	2679	8	0.00298619	94.375	18.75	0.0169076
Marine_refseq	43304	Mycolicibacterium_peregrinum	7050152	1470	3	0.00204082	94.1111	11.3333	0.00394318
Marine_refseq	43305	Butyrivibrio_proteoclasticus	4404886	5679	0	0			0
Marine_refseq	43348	Mycobacterium_branderi	5979623	501	2	0.00399202	94.0594	16	0.00341159
Marine_refseq	43354	Prauserella_rugosa	5279998	715	0	0			0
Marine_refseq	43355	Crossiella_cryophila	10058141	869	0	0			0
Marine_refseq	43357	Kutzneria_albida	9874926	1440	0	0			0
Marine_refseq	43595	Halanaerobium_saccharolyticum	2873865	29157	0	0			0
Marine_refseq	43654	Pseudoalteromonas_aurantia	5602374	3247	5	0.00153988	96.8157	18.4	0.00906758
Marine_refseq	43655	Pseudoalteromonas_citrea	5434598	3544	27	0.00761851	96.5767	26.8519	0.0356788
Marine_refseq	43656	Pseudoalteromonas_denitrificans	6094166	10672	15	0.00140555	95.7274	21.2	0.0200191
Marine_refseq	43657	Pseudoalteromonas_luteoviolacea	6043625	41672	2	4.79939e-05	90.5495	2	0.00330927
Marine_refseq	43658	Pseudoalteromonas_rubra	6143755	8562	18	0.00210231	94.3142	15.8333	0.0224944
Marine_refseq	43660	Pseudoalteromonas_undina	4027610	1586	479	0.302018	97.2107	32.6388	0.785652
Marine_refseq	43661	Shewanella_benthica	4034511	4556	20	0.00438982	94.8106	18.85	0.047292
Marine_refseq	43662	Pseudoalteromonas_piscicida	5380608	5111	6	0.00117394	96.0173	19	0.0106865
Marine_refseq	43663	Paenarthrobacter_aurescens	4355454	839	0	0			0
Marine_refseq	43667	Glutamicibacter_uratoxydans	3786014	335	0	0			0
Marine_refseq	43670	Cellulomonas_cellasea	4734929	1637	1	0.000610874	94.0594	8	0.0021542
Marine_refseq	43671	Actinotalea_fermentans	3737518	842	2	0.0023753	93.9894	15.5	0.00540466
Marine_refseq	43674	Jonesia_denitrificans	2749647	475	0	0			0
Marine_refseq	43675	Rothia_mucilaginosa	2255158	659	25	0.0379363	96.442	30.68	0.103629
Marine_refseq	43677	Promicromonospora_citrea	5016341	971	2	0.00205973	93.0693	5.5	0.00406671
Marine_refseq	43765	Corynebacterium_amycolatum	2474943	402	4	0.00995025	96.9477	36.75	0.0130104
Marine_refseq	43767	Prescottella_equi	5438826	1593	0	0			0
Marine_refseq	43768	Corynebacterium_matruchotii	2855988	953	65	0.0682057	97.9648	36.8923	0.217613
Marine_refseq	43769	Corynebacterium_propinquum	2480127	853	0	0			0
Marine_refseq	43770	Corynebacterium_striatum	2904831	282	1	0.0035461	96.9072	40	0.00337369
Marine_refseq	43771	Corynebacterium_urealyticum	2377532	403	1	0.00248139	96.25	40	0.00340689
Marine_refseq	43772	Rhodococcus_zopfii	6297215	998	2	0.00200401	92.5743	5.5	0.00323953
Marine_refseq	43775	Syntrophus_gentianae	3716692	1576	2	0.00126904	95.0495	23.5	0.00433181
Marine_refseq	43948	Tolumonas_auensis	3471292	1601	2	0.00124922	96.3894	32	0.0056175
Marine_refseq	43992	Bradyrhizobium_liaoningense	7899289	3828	24	0.00626959	94.1014	16.75	0.0105579
Marine_refseq	43995	Johnsonella_ignava	2687075	2950	0	0			0
Marine_refseq	43997	Catonella_morbi	3479204	2704	6	0.00221893	95.5543	20.8333	0.0164693
Marine_refseq	44001	Caldicellulosiruptor_saccharolyticus	2970275	1544	0	0			0
Marine_refseq	44007	Enterococcus_pseudoavium	2731874	1462	0	0			0
Marine_refseq	44008	Enterococcus_cecorum	2421598	11207	1	8.92299e-05	99.0385	42	0.00433598
Marine_refseq	44009	Enterococcus_dispar	2822228	1635	5	0.0030581	98.8119	38.4	0.0152008
Marine_refseq	44010	Mycobacterium_conspicuum	6237139	717	2	0.0027894	93.5644	13	0.00277371
Marine_refseq	44012	Ferrimonas_balearica	4279159	4212	2	0.000474834	92.3637	3	0.00282766
Marine_refseq	44060	Streptomyces_megasporus	5850061	857	0	0			0
Marine_refseq	44061	Streptomyces_thermodiastaticus	6105542	559	21	0.0375671	99.5911	42	0.0328882
Marine_refseq	44250	Paenibacillus_alvei	6582090	2789	0	0			0
Marine_refseq	44251	Paenibacillus_durus	6053498	2298	0	0			0
Marine_refseq	44252	Paenibacillus_macerans	7390297	1949	0	0			0
Marine_refseq	44255	Bradyrhizobium_oligotrophicum	8264165	1006	5	0.00497018	93.2754	14.6	0.0054573
Marine_refseq	44256	Caldanaerobius_polysaccharolyticus	2499862	1651	0	0			0
Marine_refseq	44448	Borrelia_persica	1784977	2124	1	0.00047081	91.6667	3	0.00341741
Marine_refseq	44574	Nitrosomonas_communis	4067838	4168	0	0			0
Marine_refseq	44575	Nitrosomonas_cryotolerans	2928185	10153	3	0.000295479	92.5616	11.3333	0.00382489
Marine_refseq	44576	Nitrosomonas_halophila	3211662	2132	21	0.00984991	95.7469	23.7619	0.0312922
Marine_refseq	44577	Nitrosomonas_ureae	3307820	13171	2	0.000151849	95.0196	22.5	0.00311383
Marine_refseq	44671	Geobacter_chapellei	3916219	1524	1	0.000656168	92.4528	8	0.00137888
Marine_refseq	44674	Sulfurospirillum_barnesii	2510109	4053	1	0.000246731	94.0594	8	0.00406357
Marine_refseq	44676	Geothrix_fermentans	3289813	546	1	0.0018315	92	3	0.00307008
Marine_refseq	44749	Sporobacter_termitidis	4198214	668	0	0			0
Marine_refseq	44752	Rhodococcus_wratislaviensis	9235301	549	1	0.00182149	94.898	23	0.00107197
Marine_refseq	44753	Tsukamurella_spumae	4461018	525	1	0.00190476	91.0891	3	0.00228647
Marine_refseq	44754	Fervidobacterium_gondwanense	2146020	1507	0	0			0
Marine_refseq	44823	Microcystis_wesenbergii	4683915	775	0	0			0
Marine_refseq	44933	Halomonas_cupida	4957973	1743	71	0.0407344	97.678	33.7746	0.125576
Marine_refseq	44935	Halomonas_venusta	4437754	1358	46	0.0338733	96.1967	25	0.0812573
Marine_refseq	45056	Legionella_adelaidensis	2367659	6184	4	0.000646831	94.5787	15.5	0.00886952
Marine_refseq	45060	Legionella_donaldsonii	3606555	1280	1	0.00078125	95.4545	23	0.00183
Marine_refseq	45064	Legionella_fairfieldensis	2664434	4838	17	0.00351385	96.7354	30.7647	0.0517934
Marine_refseq	45065	Legionella_geestiana	2666749	1878	5	0.00266241	96.1683	1.4	0.0181119
Marine_refseq	45066	Legionella_gratiana	3976384	7125	1	0.000140351	92.0792	3	0.00256514
Marine_refseq	45067	Legionella_lansingensis	2989256	5814	0	0			0
Marine_refseq	45068	Legionella_londiniensis	2452973	3556	13	0.00365579	96.4625	30.5385	0.0424383
Marine_refseq	45070	Legionella_nautarum	3649429	6278	1	0.000159286	93.5185	8	0.00298677
Marine_refseq	45071	Legionella_parisiensis	4202140	4748	0	0			0
Marine_refseq	45072	Legionella_quateirensis	4281523	5771	0	0			0
Marine_refseq	45073	Legionella_quinlivanii	3546255	4208	2	0.000475285	93.5644	5.5	0.00298907
Marine_refseq	45074	Legionella_santicrucis	4820916	5935	3	0.000505476	96.3637	29	0.00547614
Marine_refseq	45075	Legionella_shakespearei	3507052	5170	0	0			0
Marine_refseq	45076	Legionella_worsleiensis	3161811	5314	11	0.00207	95.7157	22.3636	0.0284647
Marine_refseq	45242	Capnocytophaga_granulosa	2843797	1342	6	0.00447094	94.0464	18.8333	0.0210282
Marine_refseq	45243	Capnocytophaga_haemolytica	2688499	2730	5	0.0018315	91.5204	3.2	0.00755068
Marine_refseq	45248	Leucothrix_mucor	5185674	5082	2	0.000393546	94.9031	1.5	0.00379893
Marine_refseq	45254	Dysgonomonas_capnocytophagoides	4784336	5053	0	0			0
Marine_refseq	45361	Mesomycoplasma_conjunctivae	846214	1889	0	0			0
Marine_refseq	45362	Mesomycoplasma_bovoculi	760240	2049	0	0			0
Marine_refseq	45363	Metamycoplasma_alkalescens	821059	3618	0	0			0
Marine_refseq	45398	Streptomyces_griseoviridis	7872322	1038	0	0			0
Marine_refseq	45462	Brevibacillus_borstelensis	5602664	1285	0	0			0
Marine_refseq	45496	Methylophaga_sulfidovorans	3006884	7635	582	0.0762279	95.798	24.5326	1.70063
Marine_refseq	45497	Schnuerera_ultunensis	3216692	5103	0	0			0
Marine_refseq	45498	Helicobacter_cholecystus	1420261	3652	0	0			0
Marine_refseq	45610	Psychrobacter_urativorans	3458123	5323	161	0.0302461	94.2225	14.2857	0.0656715
Marine_refseq	45611	Psychrobacter_frigidicola	2846672	5239	174	0.0332124	94.9069	18.2069	0.0680795
Marine_refseq	45634	Streptococcus_cristatus	2000351	4103	6	0.00146234	95.7477	21.8333	0.0281451
Marine_refseq	45655	Desulfonema_magnum	8027777	4246	19	0.0044748	93.3703	3.15789	0.0152221
Marine_refseq	45656	Desulfonema_limicola	6908045	12613	1	7.92833e-05	96.0396	1	0.00147654
Marine_refseq	45657	Desulfonema_ishimotonii	6638737	2097	0	0			0
Marine_refseq	45658	Vibrio_scophthalmi	4856725	2139	1	0.000467508	98.3333	1	0.00125599
Marine_refseq	45663	Desulfohalobium_retbaense	2909567	1617	2	0.00123686	96.8295	1	0.00659892
Marine_refseq	45668	Halobacillus_litoralis	4001992	9531	0	0			0
Marine_refseq	45670	Salinicoccus_roseus	2557957	1730	239	0.13815	97.4245	34.3849	0.882697
Marine_refseq	45677	Azohydromonas_lata	7784779	1104	0	0			0
Marine_refseq	45851	Butyrivibrio_crossotus	2521323	2337	2	0.000855798	100	42	0.00832896
Marine_refseq	45972	Staphylococcus_pasteuri	2484808	2706	37	0.0136733	98.2336	37.3784	0.133129
Marine_refseq	45979	Nocardia_pseudobrasiliensis	8407941	882	89	0.100907	93.5243	9.88764	0.00191486
Marine_refseq	46124	Granulicatella_adiacens	1965420	2216	3	0.00135379	94.5513	16	0.0158745
Marine_refseq	46126	Staphylococcus_chromogenes	2394574	3715	0	0			0
Marine_refseq	46127	Staphylococcus_felis	2479423	4595	0	0			0
Marine_refseq	46158	Actinomadura_citrea	8992310	625	0	0			0
Marine_refseq	46159	Actinomadura_coerulea	8190213	629	0	0			0
Marine_refseq	46161	Actinomadura_kijaniata	10258935	690	0	0			0
Marine_refseq	46164	Actinomadura_macra	9046351	1166	0	0			0
Marine_refseq	46165	Actinomadura_verrucosospora	9018103	744	0	0			0
Marine_refseq	46171	Nonomuraea_africana	9694534	1355	0	0			0
Marine_refseq	46172	Nonomuraea_angiospora	13093168	1154	0	0			0
Marine_refseq	46175	Microtetraspora_niveoalba	8469978	994	0	0			0
Marine_refseq	46176	Nonomuraea_polychroma	11519774	1117	1	0.000895255	92.4242	3	0.000581609
Marine_refseq	46177	Nonomuraea_pusilla	8992127	1578	0	0			0
Marine_refseq	46180	Nonomuraea_rubra	12876814	1163	14	0.0120378	92.2622	2.14286	0.0029821
Marine_refseq	46182	Nonomuraea_spiralis	11470535	575	0	0			0
Marine_refseq	46206	Pseudobutyrivibrio_ruminis	3020378	7667	0	0			0
Marine_refseq	46223	Thermoflavimicrobium_dichotomicum	3852792	2092	0	0			0
Marine_refseq	46224	Heyndrickxia_sporothermodurans	3857089	5894	0	0			0
Marine_refseq	46228	#NAME?	2733858	1702	1	0.000587544	98.0392	26	0.00376757
Marine_refseq	46234	Anabaena_sp._90	5305675	302	0	0			0
Marine_refseq	46240	Paenibacillus_apiarius	6578323	724	0	0			0
Marine_refseq	46256	Weissella_hellenica	1818703	1346	0	0			0
Marine_refseq	46351	Mycolicibacterium_hassiacum	5269097	808	10	0.0123762	93.943	18.8	0.0149361
Marine_refseq	46353	Agrococcus_jenensis	2962035	651	4	0.00614439	95.8507	24.25	0.0102632
Marine_refseq	46354	Thermoanaerobacter_wiegelii	2785056	778	0	0			0
Marine_refseq	46355	Spirochaeta_africana	3285855	1433	2	0.00139567	94.0425	4.5	0.00581279
Marine_refseq	46356	Alkalispirochaeta_alkalica	3358314	246	0	0			0
Marine_refseq	46429	Sphingobium_chlorophenolicum	4796122	960	28	0.0291667	95.0124	21.8214	0.0478303
Marine_refseq	46469	Orenia_marismortui	3459766	14212	1	7.03631e-05	90.7692	3	0.00190764
Marine_refseq	46503	Parabacteroides_merdae	4403124	1460	1	0.000684932	100	42	0.00231654
Marine_refseq	46506	Bacteroides_stercoris	4009829	1755	3	0.0017094	98.3498	14.6667	0.00763125
Marine_refseq	46507	Ezakiella_coagulans	1806048	4130	5	0.00121065	97.642	38.2	0.0266327
Marine_refseq	46541	Thermosipho_melanesiensis	1915238	5585	0	0			0
Marine_refseq	46609	Clostridium_pascui	3828744	4554	0	0			0
Marine_refseq	46677	Pseudomonas_agarici	5502003	958	11	0.0114823	93.6435	15.0909	0.00601599
Marine_refseq	46679	Pseudomonas_mucidolens	5853060	622	2	0.00321543	94.3118	13	0.00211855
Marine_refseq	46680	Pseudomonas_nitroreducens	6229472	1349	1	0.00074129	92.0792	3	0.00163738
Marine_refseq	46867	Clostridium_chauvoei	2889569	9091	1	0.000109999	92.1569	3	0.00179958
Marine_refseq	46914	Devosia_riboflavina	5052234	929	5	0.00538213	93.4194	15	0.00849129
Marine_refseq	47055	Dethiosulfovibrio_peptidovorans	2576359	518	1	0.0019305	92.0792	3	0.00395908
Marine_refseq	47157	Maridesulfovibrio_bastinii	3909169	3937	1	0.000254001	94.0594	8	0.00260925
Marine_refseq	47158	Paucidesulfovibrio_gracilis	3179481	1242	0	0			0
Marine_refseq	47303	Sulfuracidifex_metallicus	2212444	794	0	0			0
Marine_refseq	47311	Methanobrevibacter_cuticularis	2608702	3537	0	0			0
Marine_refseq	47312	Tsukamurella_pulmonis	4773464	785	13	0.0165605	97.4541	35.6154	0.0252647
Marine_refseq	47466	Borrelia_miyamotoi	906165	5547	0	0			0
Marine_refseq	47479	Streptosporangium_album	9022456	1048	0	0			0
Marine_refseq	47492	Xanthobacter_agilis	4827619	1012	17	0.0167984	94.8688	19.8235	0.0317962
Marine_refseq	47493	Limosilactobacillus_panis	2006512	578	0	0			0
Marine_refseq	47500	Aneurinibacillus_migulanus	6348994	2075	0	0			0
Marine_refseq	47671	Lautropia_mirabilis	3172010	671	17	0.0253353	97.1413	33.8824	0.0482975
Marine_refseq	47678	Bacteroides_caccae	5499725	2259	3	0.00132802	100	42	0.00561846
Marine_refseq	47679	Sporomusa_sphaeroides	5015343	977	0	0			0
Marine_refseq	47687	Mycoplasmopsis_alligatoris	973030	2640	0	0			0
Marine_refseq	47715	Lacticaseibacillus_rhamnosus	2941522	3858	0	0			0
Marine_refseq	47716	Streptomyces_olivaceus	8458055	1422	0	0			0
Marine_refseq	47735	Bibersteinia_trehalosi	2340975	4232	0	0			0
Marine_refseq	47758	Streptomyces_sulphureus	7104952	764	1	0.0013089	92.5926	8	0.000774108
Marine_refseq	47759	Streptomyces_tubercidicus	8284047	556	0	0			0
Marine_refseq	47760	Streptomyces_aurantiacus	9428393	2321	5	0.00215424	90.8467	2.2	0.0018561
Marine_refseq	47761	Streptomyces_ochraceiscleroticus	8408570	711	0	0			0
Marine_refseq	47763	Streptomyces_lydicus	8243179	2476	0	0			0
Marine_refseq	47770	Lactobacillus_crispatus	2039404	6186	33	0.00533463	97.9158	27.8788	0.134059
Marine_refseq	47834	Spiroplasma_kunkelii	1514561	1297	1	0.00077101	94.4444	23	0.00363142
Marine_refseq	47835	Spiroplasma_phoeniceum	1908276	487	0	0			0
Marine_refseq	47839	Mycobacterium_triplex	6366285	372	0	0			0
Marine_refseq	47848	Brachybacterium_tyrofermentans	4407399	628	7	0.0111465	98.1814	37.1429	0.0147025
Marine_refseq	47853	Micromonospora_carbonacea	7528335	930	0	0			0
Marine_refseq	47855	Micromonospora_citrea	7208999	644	0	0			0
Marine_refseq	47858	Micromonospora_echinofusca	7002627	1386	0	0			0
Marine_refseq	47860	Micromonospora_fulviviridis	6976653	422	1	0.00236967	93.0693	8	0.00146202
Marine_refseq	47864	Micromonospora_halophytica	6275885	626	0	0			0
Marine_refseq	47865	Micromonospora_inositola	6708094	780	0	0			0
Marine_refseq	47866	Micromonospora_inyonensis	6923970	512	0	0			0
Marine_refseq	47871	Micromonospora_peucetia	7365767	667	0	0			0
Marine_refseq	47872	Micromonospora_purpureochromogenes	6674234	913	0	0			0
Marine_refseq	47874	Micromonospora_rosaria	7383286	1149	0	0			0
Marine_refseq	47875	Micromonospora_sagamiensis	6930736	446	0	0			0
Marine_refseq	47877	Pseudomonas_amygdali	6201720	993	3	0.00302115	97.4654	14.6667	0.00356353
Marine_refseq	47878	Pseudomonas_azotoformans	6727386	2076	92	0.044316	94.2973	17.7174	0.113313
Marine_refseq	47879	Pseudomonas_corrugata	6124363	649	3	0.0046225	93.4034	6.33333	0.00308604
Marine_refseq	47880	Pseudomonas_fulva	5398139	4374	3	0.000685871	94.8824	17.6667	0.00516845
Marine_refseq	47883	Pseudomonas_synxantha	6562330	1200	14	0.0116667	98.7584	36.6429	0.0211663
Marine_refseq	47885	Pseudomonas_oryzihabitans	4986278	1329	4	0.00300978	97.4735	36.5	0.00703932
Marine_refseq	47886	Pseudomonas_luteola	5901383	504	1	0.00198413	93.1818	8	0.00150812
Marine_refseq	47917	Serratia_fonticola	6000511	4227	0	0			0
Marine_refseq	47920	Acidovorax_delafieldii	5022177	509	17	0.0333988	97.2884	30.2353	0.0294892
Marine_refseq	47951	Vibrio_cyclitrophicus	5074401	3915	14	0.00357599	95.354	16.6429	0.0270771
Marine_refseq	47988	Actinoplanes_auranticolor	9878734	1496	1	0.000668449	100	42	0.000668102
Marine_refseq	47989	Dactylosporangium_roseum	8220997	1446	0	0			0
Marine_refseq	47994	Leptothrix_mobilis	4651965	795	1	0.00125786	90.566	3	0.0011608
Marine_refseq	48003	Mycoplasmopsis_pullorum	953874	2828	0	0			0
Marine_refseq	48074	Microbulbifer_hydrolyticus	4209307	1275	0	0			0
Marine_refseq	48076	Marinobacterium_georgiense	4053293	3109	146	0.0469604	97.7804	31.7055	0.218045
Marine_refseq	48256	Ruminiclostridium_hungatei	4901053	2782	0	0			0
Marine_refseq	48292	Hyphomicrobium_zavarzinii	4651795	924	8	0.00865801	94.6767	15.75	0.0139516
Marine_refseq	48296	Acinetobacter_pittii	3862530	18093	5	0.00027635	95.1679	19.8	0.0134109
Marine_refseq	48464	Prosthecobacter_fusiformis	5828112	2287	5	0.00218627	92.9292	8.2	0.00499304
Marine_refseq	48465	Prosthecobacter_dejongeii	5995932	1539	3	0.00194932	94.0396	18	0.00193465
Marine_refseq	48466	Prosthecobacter_vanneervenii	6662711	3551	2	0.000563222	91.5952	3	0.00289672
Marine_refseq	48467	Prosthecobacter_debontii	6292356	5126	1	0.000195084	92.7273	3	0.000889969
Marine_refseq	48664	Xanthomonas_fragariae	4328441	591	1	0.00169205	100	42	0.00168652
Marine_refseq	48727	Halomonas_pantelleriensis	4402189	688	5	0.00726744	95.0611	17	0.0106765
Marine_refseq	48729	Rhabdochromatium_marinum	4363877	2597	4	0.00154024	96.026	2.75	0.0093724
Marine_refseq	48782	Leptospira_fainei	4287324	3743	0	0			0
Marine_refseq	48935	Novosphingobium_aromaticivorans	4233314	981	14	0.0142712	93.6346	13.3571	0.0262678
Marine_refseq	48936	Novosphingobium_subterraneum	4700166	267	60	0.224719	98.6672	37.3667	0.096954
Marine_refseq	49186	Marinobacterium_stanieri	4680330	2289	11	0.00480559	94.9216	22.9091	0.0135461
Marine_refseq	49278	Psychroserpens_burtonensis	3976448	11829	7	0.000591766	93.39	12.4286	0.0160193
Marine_refseq	49280	Gelidibacter_algens	4459459	7429	6	0.000807646	94.0623	10.5	0.011683
Marine_refseq	49283	Paenibacillus_thiaminolyticus	6612542	1382	0	0			0
Marine_refseq	49319	Rubrobacter_xylanophilus	3225748	2411	3	0.0012443	97.0725	35.3333	0.00641712
Marine_refseq	49338	Desulfitobacterium_hafniense	5279134	1477	0	0			0
Marine_refseq	49447	Halochromatium_salexigens	3828867	1436	9	0.00626741	94.9032	12.1111	0.0123274
Marine_refseq	49547	Methanobrevibacter_curvatus	2414608	3568	0	0			0
Marine_refseq	49893	Holospora_obtusa	1334837	3823	20	0.00523149	96.3301	29.45	0.135897
Marine_refseq	49897	Mycobacterium_hodleri	6529154	1509	3	0.00198807	93.2489	10	0.00418125
Marine_refseq	50052	Mycoplasma_crocodyli	934379	2240	0	0			0
Marine_refseq	50338	Rhizobium_sullae	7595929	1990	2	0.00100503	94.1496	13.5	0.00156663
Marine_refseq	50339	Thermoplasma_volcanium	1584804	652	0	0			0
Marine_refseq	50712	Blastochloris_sulfoviridis	3845334	751	4	0.00532623	93.8759	13.25	0.00873786
Marine_refseq	50715	Acidisphaera_rubrifaciens	3862273	1430	1	0.000699301	93	3	0.00261504
Marine_refseq	50718	Vibrio_mytili	4479466	2095	2	0.000954654	96.0283	25	0.00372812
Marine_refseq	50719	Vibrio_diabolicus	5108924	3267	15	0.00459137	97.3325	33.6	0.0266397
Marine_refseq	50960	Helicobacter_trogontum	2446321	7636	0	0			0
Marine_refseq	51047	Actinobacillus_minor	2425264	2369	0	0			0
Marine_refseq	51048	Actinobacillus_porcinus	2276241	1390	0	0			0
Marine_refseq	51049	Actinobacillus_indolicus	2251645	2410	0	0			0
Marine_refseq	51101	Brevibacillus_agri	5374818	332	0	0			0
Marine_refseq	51160	Treponema_maltophilum	2530388	641	0	0			0
Marine_refseq	51161	Actinobacillus_delphinicola	1837244	3346	3	0.000896593	99.3399	42	0.0166554
Marine_refseq	51173	Ureibacillus_thermosphaericus	3488104	4469	0	0			0
Marine_refseq	51195	Desulfofustis_glycolicus	4977298	2197	150	0.0682749	95.96	26.6333	0.279007
Marine_refseq	51197	Syntrophobotulus_glycolicus	3406739	2370	0	0			0
Marine_refseq	51201	Streptomyces_griseocarneus	7375626	1163	0	0			0
Marine_refseq	51229	Wigglesworthia_glossinidia	719535	13386	5	0.000373525	93.6196	9.2	0.0305753
Marine_refseq	51288	Kluyvera_ascorbata	5062542	654	0	0			0
Marine_refseq	51363	Metamycoplasma_auris	750874	4614	0	0			0
Marine_refseq	51364	Mycoplasma_cottewii	1016659	1142	0	0			0
Marine_refseq	51365	Mycoplasma_yeatsii	895051	2636	0	0			0
Marine_refseq	51367	Salinivibrio_costicola	3381657	586	2	0.00341297	94.0094	13	0.00348941
Marine_refseq	51515	Dehalobacterium_formicoaceticum	3766545	2829	1	0.000353482	91.8033	8	0.00164607
Marine_refseq	51616	Desulfitobacterium_chlororespirans	5606984	768	0	0			0
Marine_refseq	51642	Nitrosomonas_mobilis	3082864	3572	5	0.00139978	97.8158	35.2	0.0154402
Marine_refseq	51663	Pediococcus_damnosus	2173661	1439	0	0			0
Marine_refseq	51664	Lapidilactobacillus_dextrinicus	1836976	1357	0	0			0
Marine_refseq	51665	Aerococcus_urinaeequi	2013339	1266	11	0.00868878	97.4695	33.5455	0.055182
Marine_refseq	51669	Tetragenococcus_halophilus	2389470	6624	2	0.000301932	98.0198	12.5	0.00853746
Marine_refseq	51670	Hyphomicrobium_facile	4425354	1015	2	0.00197044	92.8033	3	0.0038415
Marine_refseq	52004	Natroniella_acetigena	2625838	5750	0	0			0
Marine_refseq	52021	Halomonas_desiderata	4737211	1084	27	0.0249077	96.2947	28.7037	0.0441188
Marine_refseq	52022	Meiothermus_silvanus	3721669	494	0	0			0
Marine_refseq	52023	Calidithermus_chliarophilus	4688964	424	0	0			0
Marine_refseq	52131	Rhizobium_hainanense	7252624	743	0	0			0
Marine_refseq	52133	Acinetobacter_venetianus	3458264	7528	1609	0.213735	97.7632	35.89	4.2037
Marine_refseq	52226	Mitsuokella_multacida	2577056	611	0	0			0
Marine_refseq	52242	Lactobacillus_gallinarum	2020091	436	0	0			0
Marine_refseq	52259	Streptomyces_humidus	9711080	818	0	0			0
Marine_refseq	52271	Anabaena_sp._CA_-_ATCC_33047	5557908	440	0	0			0
Marine_refseq	52441	Nitrosomonas_aestuarii	3442742	6370	1	0.000156986	94.1176	23	0.00200422
Marine_refseq	52442	Nitrosomonas_nitrosa	3420013	4604	10	0.00217202	93.3747	10.5	0.009883
Marine_refseq	52443	Vibrio_tapetis	5198666	3098	3	0.000968367	97.0033	30	0.00584765
Marine_refseq	52560	Desulfomicrobium_apsheronum	4254075	580	0	0			0
Marine_refseq	52584	Brachyspira_pilosicoli	2586443	18312	0	0			0
Marine_refseq	52598	Sulfitobacter_sp._EE-36	3548498	9709	7039	0.724997	97.9974	37.7323	12.884
Marine_refseq	52603	Sagittula_stellata	5290610	1868	227	0.12152	95.32	21.4846	0.350924
Marine_refseq	52689	Acetobacterium_bakii	4319181	2865	0	0			0
Marine_refseq	52691	Acetobacterium_fimetarium	3237487	1661	0	0			0
Marine_refseq	52693	Acetobacterium_paludosum	3691131	1507	0	0			0
Marine_refseq	52694	Acetobacterium_wieringae	3711234	2159	0	0			0
Marine_refseq	52695	Actinoplanes_brasiliensis	9750342	905	0	0			0
Marine_refseq	52696	Actinoplanes_cyaneus	10358347	1246	0	0			0
Marine_refseq	52697	Actinoplanes_regularis	10031706	1183	0	0			0
Marine_refseq	52698	Saccharomonospora_iraqiensis	4669397	946	0	0			0
Marine_refseq	52699	Aeromicrobium_fastidiosum	3925785	957	34	0.0355277	94.6356	18.4412	0.0712978
Marine_refseq	52704	Clostridium_vincentii	3505833	9842	2	0.000203211	92.3202	3	0.00339434
Marine_refseq	52764	Bartonella_alsatica	1659117	5693	26	0.00456701	96.4684	2.84615	0.0268818
Marine_refseq	52768	Schaalia_georgiae	2498023	426	1	0.00234742	99.0099	42	0.00408323
Marine_refseq	52769	Actinomyces_gerencseriae	3420019	574	1	0.00174216	99.0099	42	0.00298244
Marine_refseq	52770	Buchananella_hordeovulneris	2521171	581	0	0			0
Marine_refseq	52771	Actinomyces_howellii	3148934	626	0	0			0
Marine_refseq	53245	Desulfonatronovibrio_hydrogenovorans	2939696	1769	0	0			0
Marine_refseq	53254	Bosea_thiooxidans	5369373	765	4	0.00522876	94.3804	19	0.00696543
Marine_refseq	53329	Desulfospira_joergensenii	6119470	1948	1	0.000513347	92	3	0.000833406
Marine_refseq	53332	Desulfobulbus_elongatus	3961953	1245	0	0			0
Marine_refseq	53336	Tatumella_citrea	4491252	1158	3	0.00259067	94.0594	8	0.00233788
Marine_refseq	53341	Xenorhabdus_japonica	3561198	1614	0	0			0
Marine_refseq	53342	Caloramator_proteoclasticus	2655018	1276	0	0			0
Marine_refseq	53343	Desulforamulus_aeronauticus	4020963	1986	1	0.000503525	91.5254	3	0.00149218
Marine_refseq	53344	Staphylococcus_delphini	2616750	3904	0	0			0
Marine_refseq	53345	Enterococcus_durans	2988928	2254	2	0.000887311	99.5192	42	0.00692556
Marine_refseq	53346	Enterococcus_mundtii	3504528	4445	0	0			0
Marine_refseq	53356	Terracoccus_luteus	4023595	1458	3	0.00205761	95.4861	22.6667	0.00561687
Marine_refseq	53358	Intrasporangium_calvum	4024382	866	3	0.0034642	93.7073	10	0.00690789
Marine_refseq	53359	Dactylosporangium_fulvum	10494953	1427	0	0			0
Marine_refseq	53360	Dactylosporangium_matsuzakiense	11766240	609	3	0.00492611	93.7345	16.3333	0.00161479
Marine_refseq	53362	Dactylosporangium_vinaceum	11959907	1051	0	0			0
Marine_refseq	53366	Catellatospora_citrea	9360966	822	0	0			0
Marine_refseq	53367	Asanoa_ferruginea	9071909	3505	1	0.000285307	93.9394	8	0.000738544
Marine_refseq	53368	Hamadaea_tsunoensis	9478888	1611	0	0			0
Marine_refseq	53371	Pilimelia_anulata	5160904	1136	0	0			0
Marine_refseq	53372	Pilimelia_terevasa	4535755	1818	0	0			0
Marine_refseq	53378	Mycobacterium_paraffinicum	5402488	433	0	0			0
Marine_refseq	53388	Microlunatus_antarcticus	4369610	876	1	0.00114155	94.0594	8	0.0023343
Marine_refseq	53399	Hyphomicrobium_denitrificans	3638969	1152	1	0.000868056	92.7083	3	0.00266559
Marine_refseq	53406	Pseudomonas_anguilliseptica	5229617	2613	959	0.367011	99.6562	38.4056	1.691
Marine_refseq	53408	Pseudomonas_citronellolis	6951444	1310	5	0.00381679	94.2396	3	0.00584051
Marine_refseq	53412	Pseudomonas_resinovorans	6027681	1200	4	0.00333333	92.0944	4.25	0.0043632
Marine_refseq	53417	Lonepinella_koalarum	2550855	6454	6	0.000929656	97.3633	1.16667	0.00493952
Marine_refseq	53419	Treponema_socranskii	2805741	761	0	0			0
Marine_refseq	53422	Thermobrachium_celere	2644756	11175	1	8.94855e-05	90.566	3	0.00204178
Marine_refseq	53423	Thermodesulfovibrio_islandicus	2048874	888	0	0			0
Marine_refseq	53424	Thermodesulfobacterium_hveragerdense	1729593	1817	0	0			0
Marine_refseq	53427	Gordonia_hirsuta	3489460	489	1	0.00204499	92.0792	3	0.00292309
Marine_refseq	53428	Nocardia_crassostreae	8293148	806	0	0			0
Marine_refseq	53429	Nocardia_flavorosea	7440171	1045	0	0			0
Marine_refseq	53431	Nocardia_salmonicida	7414253	427	0	0			0
Marine_refseq	53432	Nocardia_uniformis	8766665	810	1	0.00123457	92.0792	3	0.0011635
Marine_refseq	53437	Nocardiopsis_alba	5861114	1092	1	0.000915751	94.0594	8	0.00174028
Marine_refseq	53440	Nocardiopsis_listeri	5685516	607	1	0.00164745	93.3333	23	0.00133673
Marine_refseq	53441	Nocardiopsis_lucentensis	6325274	658	0	0			0
Marine_refseq	53442	Eubacterium_callanderi	4316707	876	0	0			0
Marine_refseq	53443	Blautia_hydrogenotrophica	3597785	1742	0	0			0
Marine_refseq	53444	Fructilactobacillus_lindneri	1389742	3294	0	0			0
Marine_refseq	53446	Streptomyces_cinnamoneus	6662690	1541	0	0			0
Marine_refseq	53458	Janibacter_limosus	3378259	1332	1	0.000750751	93.0693	3	0.00298971
Marine_refseq	53461	Nakamurella_multipartita	6060298	1571	44	0.0280076	99.0545	39.1364	0.0643203
Marine_refseq	53462	Mycolicibacterium_mageritense	8006721	1102	7	0.00635209	93.1067	6.57143	0.00626973
Marine_refseq	53463	Paracoccus_solventivorans	3377602	1276	22	0.0172414	94.1451	15.2273	0.0431371
Marine_refseq	53483	Polaribacter_filamentus	4281931	11172	64	0.00572861	93.6774	11.7656	0.0848449
Marine_refseq	53501	Thalassobius_gelatinovorus	3985688	2097	72	0.0343348	98.7663	2.72222	0.0416992
Marine_refseq	53522	Thermobifida_alba	4903256	722	0	0			0
Marine_refseq	53558	Mycoplasmopsis_edwardii	832213	1802	0	0			0
Marine_refseq	53635	Acidimicrobium_ferrooxidans	2158157	2026	7	0.00345508	94.5314	14.5714	0.0168199
Marine_refseq	53946	Octadecabacter_arcticus	5478249	8484	1590	0.187412	96.2709	28.7277	0.294109
Marine_refseq	53953	Pyrococcus_horikoshii	1738505	609	0	0			0
Marine_refseq	53972	Rhodococcus_corynebacterioides	3977374	1172	1	0.000853242	92	3	0.00253936
Marine_refseq	54005	Peptoniphilus_harei	1929566	5445	15	0.00275482	96.8242	30.3333	0.0724515
Marine_refseq	54007	Anaerococcus_octavius	1914290	4403	27	0.00613218	98.84	38.2593	0.134619
Marine_refseq	54010	Pseudonocardia_asaccharolytica	5056835	1591	8	0.00502828	93.1119	8	0.00907682
Marine_refseq	54011	Pseudonocardia_sulfidoxydans	6576285	1646	3	0.0018226	92.451	6.33333	0.00266108
Marine_refseq	54062	Pediococcus_parvulus	2163309	1792	2	0.00111607	99.505	42	0.00758098
Marine_refseq	54067	Xylophilus_ampelinus	3731505	1139	1	0.000877963	96.0784	40	0.00139354
Marine_refseq	54120	Methanolacinia_petrolearia	2843290	589	0	0			0
Marine_refseq	54121	Halanaerobium_congolense	2831374	12478	1	8.0141e-05	92.0792	3	0.00360249
Marine_refseq	54261	Ferroglobus_placidus	2196266	466	0	0			0
Marine_refseq	54262	Thermococcus_chitonophagus	1961979	428	0	0			0
Marine_refseq	54291	Raoultella_ornithinolytica	5952440	1484	2	0.00134771	98.5149	42	0.00273837
Marine_refseq	54294	Thermosyntropha_lipolytica	2169229	2223	4	0.00179937	92.1273	9.25	0.00479433
Marine_refseq	54306	Planktothrix_mougeotii	6226999	1431	0	0			0
Marine_refseq	54311	Spirulina_subsalsa	5323600	1210	3	0.00247934	97.3597	1	0.002874
Marine_refseq	54313	Tychonema_bourrellyi	5081867	1421	1	0.00070373	90.099	2	0.00200714
Marine_refseq	54398	endosymbiont_of_Ridgeia_piscesae	3442017	562	0	0			0
Marine_refseq	54571	Streptomyces_venezuelae	8223505	4097	0	0			0
Marine_refseq	54736	Salmonella_bongori	4460105	1393	0	0			0
Marine_refseq	54767	Oceanidesulfovibrio_indonesiensis	4286425	944	0	0			0
Marine_refseq	54910	Brevibacillus_centrosporus	6242354	585	0	0			0
Marine_refseq	54911	Brevibacillus_choshinensis	6279095	2053	0	0			0
Marine_refseq	54913	Brevibacillus_formosus	6215362	1435	0	0			0
Marine_refseq	54914	Brevibacillus_parabrevis	6088079	456	0	0			0
Marine_refseq	54915	Brevibacillus_reuszeri	6986486	3996	0	0			0
Marine_refseq	55085	Streptococcus_thoraltensis	2385218	1350	0	0			0
Marine_refseq	55197	Flavobacterium_branchiophilum	3563292	15212	21	0.00138049	95.2098	3.47619	0.0257346
Marine_refseq	55205	Caldicellulosiruptor_owensensis	2428903	2699	0	0			0
Marine_refseq	55206	Sediminispirochaeta_smaragdinae	4653970	620	0	0			0
Marine_refseq	55207	Pectobacterium_betavasculorum	4685213	441	0	0			0
Marine_refseq	55209	Pantoea_cypripedii	6553825	1916	0	0			0
Marine_refseq	55211	Erwinia_persicina	4802925	2225	1	0.000449438	100	42	0.00218617
Marine_refseq	55212	Erwinia_rhapontici	5164665	553	3	0.00542495	97.7986	1	0.00271073
Marine_refseq	55213	Brenneria_rubrifaciens	4133520	842	0	0			0
Marine_refseq	55214	Brenneria_salicis	4045881	677	1	0.0014771	92.0792	3	0.00252108
Marine_refseq	55218	Ruegeria_lacuscaerulensis	4593455	6507	3	0.000461042	92.5758	4.66667	0.00478942
Marine_refseq	55404	Streptomyces_netropsis	8144008	690	0	0			0
Marine_refseq	55504	Sporomusa_silvacetica	6046356	1740	0	0			0
Marine_refseq	55505	Thermonema_rossianum	2954967	1521	0	0			0
Marine_refseq	55507	Schwartzia_succinivorans	2659575	923	0	0			0
Marine_refseq	55508	Janthinobacterium_agaricidamnosum	5949001	627	1	0.0015949	94.4444	8	0.00183224
Marine_refseq	55518	Magnetospirillum_gryphiswaldense	4365796	2144	10	0.00466418	92.5692	7.9	0.0123002
Marine_refseq	55565	Actinomyces_graevenitzii	2205725	460	5	0.0108696	97.8218	41.2	0.0219429
Marine_refseq	55601	Vibrio_anguillarum	4175625	1784	0	0			0
Marine_refseq	55603	Mycoplasmopsis_caviae	1155014	2209	0	0			0
Marine_refseq	55604	Mycoplasmopsis_primatum	902769	3203	0	0			0
Marine_refseq	55758	Methanobrevibacter_filiformis	2606143	3305	0	0			0
Marine_refseq	55802	Thermococcus_barophilus	2064237	779	0	0			0
Marine_refseq	55952	Streptomyces_toyocaensis	7341014	455	0	0			0
Marine_refseq	55969	Leucobacter_komagatae	3752337	966	0	0			0
Marine_refseq	56055	Bogoriella_caseilytica	3235396	462	0	0			0
Marine_refseq	56192	Photobacterium_iliopiscarium	4308695	3396	4	0.00117786	94.2554	12.75	0.00642886
Marine_refseq	56193	Sphingobium_chungbukense	5516495	482	74	0.153527	95.3767	24.0676	0.0862504
Marine_refseq	56361	Sphingomonas_ursincola	3807031	2028	604	0.29783	98.3847	37.7119	1.4007
Marine_refseq	56425	Mycobacterium_bohemicum	5420516	639	4	0.00625978	95.3922	24.25	0.00713954
Marine_refseq	56426	Bartonella_clarridgeiae	1522743	5658	0	0			0
Marine_refseq	56438	Couchioplanes_caeruleus	8428293	3384	0	0			0
Marine_refseq	56448	Xanthomonas_arboricola	4997863	5391	0	0			0
Marine_refseq	56454	Xanthomonas_hortorum	5250904	1057	0	0			0
Marine_refseq	56458	Xanthomonas_sacchari	4957212	581	0	0			0
Marine_refseq	56459	Xanthomonas_vasicola	4837576	617	1	0.00162075	97	40	0.00208782
Marine_refseq	56460	Xanthomonas_vesicatoria	5349905	510	0	0			0
Marine_refseq	56463	Xanthomonas_codiaei	5043310	331	0	0			0
Marine_refseq	56464	Xanthomonas_theicola	4785596	513	1	0.00194932	93	2	0.0021105
Marine_refseq	56689	Mycolicibacterium_mucogenicum	6099273	1240	42	0.033871	95.1929	22.5952	0.0668768
Marine_refseq	56698	Sulfurospirillum_arsenophilum	2629984	2431	0	0			0
Marine_refseq	56730	Rhizobium_gallicum	7311190	558	2	0.00358423	93.1033	2.5	0.00280392
Marine_refseq	56731	Rhizobium_giardinii	6569494	860	2	0.00232558	94.0594	13	0.00310526
Marine_refseq	56779	Halanaerobium_kushneri	3222148	1472	0	0			0
Marine_refseq	56804	Glaciecola_punicea	3201741	6978	283	0.040556	95.6634	23.9753	0.136832
[truncated: 235,990+ more rows]

## Sheet: S4C Soil
Table S4C. Genome Coverage Checker output for Soil samples. Soil_refseq refers to the reads from all samples combined.
Sample	taxid	Species name	Reference genome length (bp)	Kraken reads assigned	Bowtie2 reads mapped	Proportion kraken reads mapped with Bowtie2	Bowtie2 mean identity of mapped reads (%)	Bowtie2 mean MAPQ of mapped reads	Bowtie2 genome fraction (%)
Soil_refseq	7	Azorhizobium_caulinodans	5369772	390	4	0.0102564	92.7708	4.25	0.00582893
Soil_refseq	9	Buchnera_aphidicola	641454	178	3	0.0168539	94.6809	23	0.0148101
Soil_refseq	11	Cellulomonas_gilvus	3526441	1716	12	0.00699301	94.0347	16.5833	0.0284423
Soil_refseq	14	Dictyoglomus_thermophilum	1959987	8	0	0			0
Soil_refseq	17	Methylophilus_methylotrophus	2860219	44	0	0			0
Soil_refseq	19	Syntrophotalea_carbinolica	3665893	157	0	0			0
Soil_refseq	21	Phenylobacterium_immobile	3328570	713	19	0.026648	94.1627	17.1053	0.0678369
Soil_refseq	23	Shewanella_colwelliana	4642543	52	2	0.0384615	92.5926	3	0.00176627
Soil_refseq	24	Shewanella_putrefaciens	4386330	72	0	0			0
Soil_refseq	25	Shewanella_hanedai	5939027	37	0	0			0
Soil_refseq	33	Myxococcus_fulvus	10824667	852	18	0.0211268	93.3877	13.5	0.0173308
Soil_refseq	34	Myxococcus_xanthus	9139763	1231	38	0.0308692	94.8482	21.9737	0.0384474
Soil_refseq	35	Corallococcus_macrosporus	8973512	2101	47	0.0223703	93.909	15.8085	0.0556861
Soil_refseq	41	Stigmatella_aurantiaca	9365767	2522	186	0.073751	94.1506	17.1559	0.209743
Soil_refseq	43	Cystobacter_fuscus	12282374	2392	100	0.041806	94.2465	18.24	0.0859606
Soil_refseq	48	Archangium_gephyra	12489432	3508	1067	0.304162	95.3041	24.5192	0.883235
Soil_refseq	51	Chondromyces_apiculatus	11577721	2836	20	0.00705219	93.9452	17.35	0.0129905
Soil_refseq	52	Chondromyces_crocatus	11388132	2275	18	0.00791209	93.2958	10.8889	0.0139092
Soil_refseq	54	Nannocystis_exedens	12059053	3877	199	0.0513283	94.0099	16.196	0.171896
Soil_refseq	56	Sorangium_cellulosum	13033779	21741	149	0.00685341	94.185	17.9866	0.0754501
Soil_refseq	61	Vitreoscilla_stercoraria	2661781	4	0	0			0
Soil_refseq	63	Vitreoscilla_filiformis	3787551	234	1	0.0042735	98.1481	42	0.00145213
Soil_refseq	69	Lysobacter_enzymogenes	6096022	6287	155	0.024654	93.3037	11.1226	0.249458
Soil_refseq	72	Simonsiella_muelleri	2469862	10	0	0			0
Soil_refseq	84	Hyphomicrobium_methylovorum	3445405	406	3	0.00738916	92.1449	3	0.00339583
Soil_refseq	86	Hyphomonas_jannaschiana	3640843	281	0	0			0
Soil_refseq	94	Stella_humosa	5832650	2602	27	0.0103766	94.1195	11.2222	0.034084
Soil_refseq	100	Ancylobacter_aquaticus	4831989	739	10	0.0135318	92.89	10.7	0.0187914
Soil_refseq	102	Polaribacter_glomeratus	4064562	81	0	0			0
Soil_refseq	103	Flectobacillus_major	6221030	165	0	0			0
Soil_refseq	104	Cyclobacterium_marinum	6221273	888	36	0.0405405	94.7566	19.1667	0.0390756
Soil_refseq	106	Runella_slithyformis	6919729	359	0	0			0
Soil_refseq	114	Gemmata_obscuriglobus	8998893	2199	75	0.0341064	93.504	13.72	0.0719644
Soil_refseq	119	Rubinisphaera_brasiliensis	6006602	355	10	0.028169	95.6697	23.2	0.0170646
Soil_refseq	120	Planctopirus_limnophila	5460085	183	0	0			0
Soil_refseq	122	Gimesia_maris	7816689	495	2	0.0040404	95.3285	24	0.00225159
Soil_refseq	124	Blastopirellula_marina	6663851	3609	8	0.00221668	92.3679	4.25	0.00669283
Soil_refseq	128	Isosphaera_pallida	5529304	834	3	0.00359712	93.7514	2.33333	0.00555224
Soil_refseq	134	Methylocystis_parvus	4529117	579	12	0.0207254	93.0661	9.08333	0.0191649
Soil_refseq	139	Borreliella_burgdorferi	1321434	9	0	0			0
Soil_refseq	140	Borrelia_hermsii	1161689	2	0	0			0
Soil_refseq	141	Borrelia_parkeri	1030684	1	0	0			0
Soil_refseq	143	Borrelia_anserina	1042690	7	0	0			0
Soil_refseq	144	Borrelia_coriaceae	1787333	4	0	0			0
Soil_refseq	148	Sediminispirochaeta_bajacaliforniensis	4576607	28	0	0			0
Soil_refseq	150	Spirochaeta_isovalerica	4875193	57	0	0			0
Soil_refseq	154	Spirochaeta_thermophila	2560222	293	4	0.0136519	95.3067	4.5	0.0101554
Soil_refseq	156	Treponema_zuelzerae	3621248	114	0	0			0
Soil_refseq	158	Treponema_denticola	2843201	61	0	0			0
Soil_refseq	159	Brachyspira_hyodysenteriae	3085162	43	0	0			0
Soil_refseq	160	Treponema_pallidum	1139633	6	0	0			0
Soil_refseq	162	Treponema_phagedenis	3372116	29	0	0			0
Soil_refseq	163	Treponema_bryantii	3516600	63	0	0			0
Soil_refseq	164	Treponema_pectinovorum	2224027	9	0	0			0
Soil_refseq	165	Treponema_saccharophilum	3459320	107	0	0			0
Soil_refseq	167	Treponema_succinifaciens	2897425	14	0	0			0
Soil_refseq	172	Leptospira_biflexa	3951448	19	0	0			0
Soil_refseq	173	Leptospira_interrogans	4630763	47	0	0			0
Soil_refseq	174	Leptospira_borgpetersenii	3992782	14	0	0			0
Soil_refseq	180	Leptospirillum_ferrooxidans	2559538	54	0	0			0
Soil_refseq	183	Leptonema_illini	4522760	166	1	0.0060241	98.0132	1	0.00336078
Soil_refseq	188	Magnetospirillum_magnetotacticum	4523935	472	2	0.00423729	92.6174	5.5	0.0033157
Soil_refseq	189	Novispirillum_itersonii	4290651	1066	0	0			0
Soil_refseq	190	Aquaspirillum_serpens	2612795	54	1	0.0185185	99.3377	42	0.00581752
Soil_refseq	192	Azospirillum_brasilense	7030811	3541	6	0.00169444	93.4862	11.5	0.00685554
Soil_refseq	193	Azospirillum_lipoferum	7987183	1085	5	0.00460829	92.9422	8.2	0.00768732
Soil_refseq	195	Campylobacter_coli	1716536	459	0	0			0
Soil_refseq	196	Campylobacter_fetus	1804582	21	0	0			0
Soil_refseq	197	Campylobacter_jejuni	1641481	157	0	0			0
Soil_refseq	198	Campylobacter_hyointestinalis	1808149	7	0	0			0
Soil_refseq	199	Campylobacter_concisus	1840041	271	0	0			0
Soil_refseq	200	Campylobacter_curvus	1974918	57	0	0			0
Soil_refseq	201	Campylobacter_lari	1488515	55	0	0			0
Soil_refseq	202	Campylobacter_mucosalis	1773478	22	0	0			0
Soil_refseq	203	Campylobacter_rectus	2571679	29	0	0			0
Soil_refseq	204	Campylobacter_showae	2097887	63	0	0			0
Soil_refseq	206	Campylobacter_sputorum	1753386	6	0	0			0
Soil_refseq	210	Helicobacter_pylori	1696601	316	0	0			0
Soil_refseq	211	Helicobacter_sp._CLO-3	2245396	1	0	0			0
Soil_refseq	212	Helicobacter_acinonychis	1557588	20	0	0			0
Soil_refseq	213	Helicobacter_cinaedi	2101402	12	0	0			0
Soil_refseq	214	Helicobacter_felis	1672681	23	0	0			0
Soil_refseq	215	Helicobacter_fennelliae	2223074	9	0	0			0
Soil_refseq	216	Helicobacter_muridarum	2263336	9	0	0			0
Soil_refseq	217	Helicobacter_mustelae	1576607	12	0	0			0
Soil_refseq	227	Pseudoalteromonas_carrageenovora	4584980	3	0	0			0
Soil_refseq	228	Pseudoalteromonas_haloplanktis	3972527	1	0	0			0
Soil_refseq	235	Brucella_abortus	3296863	32	0	0			0
Soil_refseq	236	Brucella_ovis	3275590	13	0	0			0
Soil_refseq	238	Elizabethkingia_meningoseptica	3874791	274	0	0			0
Soil_refseq	244	Planomicrobium_okeanokoites	3434210	17568	14596	0.830829	98.0645	37.3266	31.8591
Soil_refseq	245	Flavobacterium_aquatile	3490856	142	0	0			0
Soil_refseq	246	Chryseobacterium_balustinum	4974086	39	3	0.0769231	96.2138	34.6667	0.00546834
Soil_refseq	247	Empedobacter_brevis	3792478	311	66	0.212219	97.4788	31.9091	0.126725
Soil_refseq	249	Terrimonas_ferruginea	4686152	305	0	0			0
Soil_refseq	250	Chryseobacterium_gleum	5643321	117	5	0.042735	94.1074	17	0.00694626
Soil_refseq	251	Psychroflexus_gondwanensis	3311768	195	4	0.0205128	93.2805	10.75	0.0104174
Soil_refseq	252	Halomonas_halmophila	3253825	1050	33	0.0314286	94.0006	15.5152	0.0613432
Soil_refseq	253	Chryseobacterium_indologenes	4929686	306	13	0.0424837	95.6346	23.0769	0.0251537
Soil_refseq	254	Chryseobacterium_indoltheticum	4253895	175	34	0.194286	96.6611	33.5588	0.0878254
Soil_refseq	256	Myroides_odoratus	4242475	341	4	0.0117302	97.1677	32.5	0.00662349
Soil_refseq	258	Sphingobacterium_spiritivorum	5138280	1187	82	0.0690817	98.0962	35.5488	0.1063
Soil_refseq	259	Sphingobacterium_thalpophilum	5962893	419	66	0.157518	97.1592	28.6818	0.0909122
Soil_refseq	263	Francisella_tularensis	1870206	60	0	0			0
Soil_refseq	266	Paracoccus_denitrificans	5242327	957	88	0.091954	95.7765	24.2727	0.157525
Soil_refseq	267	Paracoccus_sp.	3284009	13	0	0			0
Soil_refseq	271	Thermus_aquaticus	2338641	206	0	0			0
Soil_refseq	274	Thermus_thermophilus	2116056	366	7	0.0191257	97.76	31	0.022731
Soil_refseq	276	Thermus_filiformis	2386081	354	0	0			0
Soil_refseq	277	Meiothermus_ruber	3097457	220	0	0			0
Soil_refseq	280	Xanthobacter_autotrophicus	5013287	897	20	0.0222965	95.813	26.25	0.0407717
Soil_refseq	281	Xanthobacter_flavus	5768244	753	0	0			0
Soil_refseq	285	Comamonas_testosteroni	5497097	794	0	0			0
Soil_refseq	287	Pseudomonas_aeruginosa	6264404	9419	29	0.00307888	95.0841	15.3103	0.0450482
Soil_refseq	288	Pseudoalteromonas_atlantica	4468419	2	0	0			0
Soil_refseq	292	Burkholderia_cepacia	8366868	2542	1	0.000393391	92	3	0.000609547
Soil_refseq	293	Brevundimonas_diminuta	3438815	16518	8107	0.490798	95.4472	25.3376	18.8504
Soil_refseq	294	Pseudomonas_fluorescens	6511547	5458	6	0.0010993	91.8576	5.33333	0.0132073
Soil_refseq	296	Pseudomonas_fragi	5077209	516	0	0			0
Soil_refseq	297	Hydrogenophilus_thermoluteolus	2288780	156	5	0.0320513	96.9528	34.4	0.0162532
Soil_refseq	298	Pseudomonas_marginalis	6799674	179	0	0			0
Soil_refseq	300	Pseudomonas_mendocina	5372474	1085	6	0.00552995	92.7818	4.66667	0.0162681
Soil_refseq	301	Pseudomonas_oleovorans	4686340	454	7	0.0154185	92.3123	4.42857	0.0144462
Soil_refseq	303	Pseudomonas_putida	6156701	4576	36	0.00786713	93.3313	11.9167	0.0675524
Soil_refseq	304	Pelomonas_saccharophila	5771016	851	6	0.00705053	93.6913	14.3333	0.00958237
Soil_refseq	305	Ralstonia_solanacearum	5530249	2085	4	0.00191847	92.7263	8.25	0.00605759
Soil_refseq	306	Pseudomonas_sp.	7278314	5	0	0			0
Soil_refseq	316	Stutzerimonas_stutzeri	4545686	22489	914	0.0406421	96.5507	28.9081	2.05606
Soil_refseq	317	Pseudomonas_syringae	5868373	2572	2	0.000777605	92.7273	3	0.0018915
Soil_refseq	329	Ralstonia_pickettii	5254771	669	2	0.00298954	93.3532	13	0.00576619
Soil_refseq	337	Burkholderia_glumae	6820727	830	4	0.00481928	93.241	13	0.00174468
Soil_refseq	339	Xanthomonas_campestris	4942039	4009	50	0.0124719	94.4337	19.04	0.0602585
Soil_refseq	343	Xanthomonas_translucens	4649333	2251	72	0.0319858	93.3584	11.8889	0.150258
Soil_refseq	346	Xanthomonas_citri	5222255	434	7	0.016129	94.279	19.7143	0.0152616
Soil_refseq	347	Xanthomonas_oryzae	4846413	820	13	0.0158537	93.6947	11.7692	0.0235226
Soil_refseq	350	Zoogloea_ramigera	4605859	747	6	0.00803213	97.8234	36	0.00705623
Soil_refseq	353	Azotobacter_chroococcum	5023055	1213	5	0.00412201	92.9552	11	0.0132589
Soil_refseq	354	Azotobacter_vinelandii	5365318	528	3	0.00568182	91.8498	3	0.00369037
Soil_refseq	358	Agrobacterium_tumefaciens	6002464	2740	6	0.00218978	92.6975	7.16667	0.0117119
Soil_refseq	359	Agrobacterium_rhizogenes	6215524	1282	3	0.00234009	93.5613	16.3333	0.0050036
Soil_refseq	373	Agrobacterium_vitis	5754491	2550	11	0.00431373	93.3517	12.1818	0.0134851
Soil_refseq	375	Bradyrhizobium_japonicum	9226248	2523	19	0.00753072	93.281	12.4737	0.021157
Soil_refseq	376	Bradyrhizobium_sp.	5348614	164	0	0			0
Soil_refseq	380	Sinorhizobium_fredii	6810864	1769	13	0.00734878	93.8401	13.3077	0.0217887
Soil_refseq	381	Mesorhizobium_loti	7451806	2877	25	0.00868961	93.4144	12.08	0.0382323
Soil_refseq	382	Sinorhizobium_meliloti	6926935	4913	1244	0.253206	98.757	39.2307	1.70807
Soil_refseq	384	Rhizobium_leguminosarum	7598116	8902	71	0.00797574	94.0545	17.7042	0.0954052
Soil_refseq	396	Rhizobium_phaseoli	6726041	825	7	0.00848485	92.5987	8.71429	0.0102884
Soil_refseq	398	Rhizobium_tropici	6686334	440	0	0			0
Soil_refseq	399	Neorhizobium_galegae	6455027	3260	45	0.0138037	93.8408	15.5778	0.0712778
Soil_refseq	405	Methylobacillus_flagellatus	2971517	169	5	0.0295858	93.0093	8	0.0196533
Soil_refseq	406	Methylobacillus_glycogenes	3248999	117	0	0			0
Soil_refseq	408	Methylorubrum_extorquens	6123851	1650	29	0.0175758	95.9602	25.5172	0.0543939
Soil_refseq	409	Methylobacterium_sp.	7018685	8	0	0			0
Soil_refseq	410	Methylobacterium_organophilum	5319780	1268	8	0.00630915	93.4065	12.625	0.0154518
Soil_refseq	414	Methylococcus_capsulatus	3304561	557	1	0.00179533	92.3077	3	0.00160384
Soil_refseq	415	Methylobacter_luteus	5029135	267	5	0.0187266	94.2257	16.2	0.0048915
Soil_refseq	421	Methylomonas_methanica	5023270	335	0	0			0
Soil_refseq	426	Methylosinus_trichosporium	4962262	28	0	0			0
Soil_refseq	428	Methylosinus_sporium	3785845	136	0	0			0
Soil_refseq	435	Acetobacter_aceti	3634414	292	2	0.00684932	96.0221	25	0.00833697
Soil_refseq	436	Novacetimonas_hansenii	3549186	172	0	0			0
Soil_refseq	437	Acidomonas_methanolica	3681251	706	13	0.0184136	95.8175	27.6923	0.0263769
Soil_refseq	438	Acetobacter_pasteurianus	3403928	114	0	0			0
Soil_refseq	442	Gluconobacter_oxydans	2882437	213	0	0			0
Soil_refseq	446	Legionella_pneumophila	3409143	294	10	0.0340136	98.7548	40.2	0.0337622
Soil_refseq	447	Legionella_bozemanae	4232311	30	0	0			0
Soil_refseq	448	Legionella_erythra	3239140	81	0	0			0
Soil_refseq	449	Legionella_hackeliae	3570857	34	0	0			0
Soil_refseq	450	Legionella_longbeachae	4149158	23	0	0			0
Soil_refseq	451	Tatlockia_micdadei	3310028	32	0	0			0
Soil_refseq	452	Legionella_spiritensis	3348070	388	246	0.634021	97.5702	34.2967	0.690637
Soil_refseq	453	Legionella_feeleii	3534250	15	0	0			0
Soil_refseq	454	Legionella_israelensis	3111640	108	21	0.194444	96.6751	30.7143	0.0848427
Soil_refseq	455	Legionella_jamestowniensis	3409712	33	0	0			0
Soil_refseq	456	Legionella_jordanis	3133723	62	1	0.016129	96.0265	24	0.00485046
Soil_refseq	458	Legionella_rubrilucens	3186910	50	0	0			0
Soil_refseq	460	Legionella_steigerwaltii	3998094	17	0	0			0
Soil_refseq	463	Fluoribacter_dumoffii	3909670	22	0	0			0
Soil_refseq	464	Fluoribacter_gormanii	3872652	14	0	0			0
Soil_refseq	466	Legionella_maceachernii	3661065	41	0	0			0
Soil_refseq	470	Acinetobacter_baumannii	3999136	1345	4	0.00297398	97.2749	11.25	0.00860186
Soil_refseq	471	Acinetobacter_calcoaceticus	3945682	82	0	0			0
Soil_refseq	476	Moraxella_bovis	2807142	7	0	0			0
Soil_refseq	477	Moraxella_lacunata	3178664	20	0	0			0
Soil_refseq	478	Moraxella_nonliquefaciens	2343743	14	0	0			0
Soil_refseq	480	Moraxella_catarrhalis	1994386	67	0	0			0
Soil_refseq	483	Neisseria_cinerea	1832904	24	0	0			0
Soil_refseq	484	Neisseria_flavescens	2231882	9	0	0			0
Soil_refseq	485	Neisseria_gonorrhoeae	2171755	68	0	0			0
Soil_refseq	486	Neisseria_lactamica	2200224	46	0	0			0
Soil_refseq	487	Neisseria_meningitidis	2181327	261	0	0			0
Soil_refseq	488	Neisseria_mucosa	2654294	45	0	0			0
Soil_refseq	489	Neisseria_polysaccharea	2029584	12	0	0			0
Soil_refseq	490	Neisseria_sicca	2566407	144	0	0			0
Soil_refseq	492	Neisseria_animalis	2236930	59	0	0			0
Soil_refseq	493	Neisseria_canis	2569389	29	0	0			0
Soil_refseq	494	Bergeriella_denitrificans	2549372	61	0	0			0
Soil_refseq	495	Neisseria_elongata	2406516	102	1	0.00980392	94.6667	23	0.00627463
Soil_refseq	496	Neisseria_macacae	2801968	2	0	0			0
Soil_refseq	498	Psychrobacter_immobilis	3243066	79	0	0			0
Soil_refseq	500	Thermomicrobium_roseum	2920744	927	3	0.00323625	91.6131	2	0.00996321
Soil_refseq	502	Kingella_denitrificans	2220058	85	3	0.0352941	96.2472	34.6667	0.02054
Soil_refseq	504	Kingella_kingae	2006553	40	0	0			0
Soil_refseq	505	Kingella_oralis	2420532	26	0	0			0
Soil_refseq	511	Alcaligenes_faecalis	4248684	9098	5625	0.618268	97.6357	35.9312	11.2597
Soil_refseq	518	Bordetella_bronchiseptica	5199761	996	37	0.0371486	96.348	29.8108	0.0654453
Soil_refseq	519	Bordetella_parapertussis	4775567	74	10	0.135135	96.0203	30.2	0.0198092
Soil_refseq	520	Bordetella_pertussis	4088701	181	2	0.0110497	93.5012	13	0.00616333
Soil_refseq	521	Bordetella_avium	3721798	569	7	0.0123023	94.381	20.7143	0.0207964
Soil_refseq	523	Acidiphilium_angustum	4175408	15	0	0			0
Soil_refseq	524	Acidiphilium_cryptum	3963080	38	0	0			0
Soil_refseq	525	Acidocella_facilis	3403931	269	3	0.0111524	93.4722	16.3333	0.00840205
Soil_refseq	526	Acidiphilium_rubrum	3976993	4	0	0			0
Soil_refseq	529	Brucella_anthropi	4858647	1263	197	0.155978	98.5992	38.2741	0.358207
Soil_refseq	531	Polaribacter_irgensii	2763458	103	0	0			0
Soil_refseq	533	Beijerinckia_indica	4418616	358	4	0.0111732	95.7738	28.75	0.00429999
Soil_refseq	536	Chromobacterium_violaceum	4808040	786	0	0			0
Soil_refseq	537	Iodobacter_fluviatilis	5098455	111	0	0			0
Soil_refseq	539	Eikenella_corrodens	2192577	139	0	0			0
Soil_refseq	542	Zymomonas_mobilis	2163236	139	4	0.028777	92.871	7.5	0.0152087
Soil_refseq	545	Citrobacter_koseri	4735357	129	3	0.0232558	99.3363	42	0.00960857
Soil_refseq	546	Citrobacter_freundii	5171093	332	0	0			0
Soil_refseq	548	Klebsiella_aerogenes	5281764	546	0	0			0
Soil_refseq	549	Pantoea_agglomerans	4692018	384	1	0.00260417	96.0526	24	0.00164108
Soil_refseq	550	Enterobacter_cloacae	5023439	476	1	0.00210084	96.6216	1	0.0029661
Soil_refseq	552	Erwinia_amylovora	3832351	157	5	0.0318471	96.741	1	0.007802
Soil_refseq	553	Pantoea_ananatis	4867131	155	0	0			0
Soil_refseq	554	Pectobacterium_carotovorum	4892225	172	0	0			0
Soil_refseq	556	Dickeya_chrysanthemi	4813854	87	0	0			0
Soil_refseq	562	Escherichia_coli	5594605	9404	8	0.000850702	97.0003	1	0.0119937
Soil_refseq	563	Shimwellia_blattae	4158725	97	0	0			0
Soil_refseq	564	Escherichia_fergusonii	4645928	72	0	0			0
Soil_refseq	565	Atlantibacter_hermannii	4554875	225	0	0			0
Soil_refseq	566	Pseudescherichia_vulneris	4398823	186	0	0			0
Soil_refseq	569	Hafnia_alvei	4772047	137	2	0.0145985	91.7647	3	0.00180216
Soil_refseq	571	Klebsiella_oxytoca	5857964	233	0	0			0
Soil_refseq	573	Klebsiella_pneumoniae	5682322	4151	5	0.00120453	97.46	17.4	0.00920398
Soil_refseq	575	Raoultella_planticola	5823931	81	0	0			0
Soil_refseq	577	Raoultella_terrigena	5598454	1309	0	0			0
Soil_refseq	580	Kluyvera_cryocrescens	4765584	97	0	0			0
Soil_refseq	582	Morganella_morganii	3889903	525	0	0			0
Soil_refseq	584	Proteus_mirabilis	4099895	207	0	0			0
Soil_refseq	585	Proteus_vulgaris	4035522	56	0	0			0
Soil_refseq	587	Providencia_rettgeri	4641942	96	0	0			0
Soil_refseq	588	Providencia_stuartii	4487528	71	0	0			0
Soil_refseq	614	Serratia_liquefaciens	5282719	120	4	0.0333333	98.7612	42	0.00685253
Soil_refseq	615	Serratia_marcescens	5160776	1731	6	0.0034662	96.7837	35	0.0163348
Soil_refseq	618	Serratia_odorifera	5001108	143	0	0			0
Soil_refseq	621	Shigella_boydii	4825405	2	0	0			0
Soil_refseq	622	Shigella_dysenteriae	5192674	9	0	0			0
Soil_refseq	623	Shigella_flexneri	4828820	37	0	0			0
Soil_refseq	624	Shigella_sonnei	4994001	41	0	0			0
Soil_refseq	628	Xenorhabdus_nematophila	4587917	33	0	0			0
Soil_refseq	630	Yersinia_enterocolitica	4625880	139	0	0			0
Soil_refseq	631	Yersinia_intermedia	4928910	30	0	0			0
Soil_refseq	632	Yersinia_pestis	4658411	13	0	0			0
Soil_refseq	633	Yersinia_pseudotuberculosis	4610200	20	0	0			0
Soil_refseq	634	Yersinia_bercovieri	4401131	19	0	0			0
Soil_refseq	636	Edwardsiella_tarda	3802888	259	1	0.003861	91.4634	3	0.00218255
Soil_refseq	638	Arsenophonus_nasoniae	4987107	12	0	0			0
Soil_refseq	644	Aeromonas_hydrophila	4744448	1110	2	0.0018018	93.75	8	0.00137002
Soil_refseq	645	Aeromonas_salmonicida	4954811	382	0	0			0
Soil_refseq	646	Aeromonas_sobria	4683669	200	0	0			0
Soil_refseq	648	Aeromonas_caviae	4586140	630	0	0			0
Soil_refseq	649	Aeromonas_eucrenophila	4540059	108	1	0.00925926	92.053	3	0.00334797
Soil_refseq	650	Aeromonas_jandaei	4551079	271	3	0.0110701	92.9173	9.66667	0.00235109
Soil_refseq	651	Aeromonas_media	4531033	326	0	0			0
Soil_refseq	652	Aeromonas_schubertii	4140228	323	1	0.00309598	91.8919	3	0.00181149
Soil_refseq	654	Aeromonas_veronii	4561870	1067	0	0			0
Soil_refseq	656	Aeromonas_allosaccharophila	4630407	155	0	0			0
Soil_refseq	659	Photobacterium_phosphoreum	4550107	97	0	0			0
Soil_refseq	661	Photobacterium_angustum	4882508	41	0	0			0
Soil_refseq	663	Vibrio_alginolyticus	5150420	120	0	0			0
Soil_refseq	666	Vibrio_cholerae	4138412	382	1	0.0026178	96	24	0.00364874
Soil_refseq	668	Aliivibrio_fischeri	4273718	115	0	0			0
Soil_refseq	669	Vibrio_harveyi	5869008	72	0	0			0
Soil_refseq	670	Vibrio_parahaemolyticus	5165770	778	2	0.00257069	96.9072	1	0.00379421
Soil_refseq	671	Vibrio_proteolyticus	4745539	5	0	0			0
Soil_refseq	672	Vibrio_vulnificus	5007160	315	0	0			0
Soil_refseq	673	Grimontia_hollisae	3998439	83	0	0			0
Soil_refseq	674	Vibrio_mimicus	4443087	71	0	0			0
Soil_refseq	675	Vibrio_cincinnatiensis	3800816	124	0	0			0
Soil_refseq	676	Vibrio_fluvialis	4827733	205	0	0			0
Soil_refseq	680	Vibrio_campbellii	5425575	67	0	0			0
Soil_refseq	685	Vibrio_diazotrophicus	4820957	33	0	0			0
Soil_refseq	687	Vibrio_gazogenes	4712479	81	0	0			0
Soil_refseq	688	Aliivibrio_logei	4638003	5	0	0			0
Soil_refseq	689	Vibrio_mediterranei	5651202	36	2	0.0555556	93.4211	8	0.00136254
Soil_refseq	691	Vibrio_natriegens	5175153	33	0	0			0
Soil_refseq	693	Vibrio_nereis	4085582	32	0	0			0
Soil_refseq	703	Plesiomonas_shigelloides	3860786	164	0	0			0
Soil_refseq	714	Aggregatibacter_actinomycetemcomitans	2109143	129	0	0			0
Soil_refseq	715	Actinobacillus_pleuropneumoniae	2318657	19	0	0			0
Soil_refseq	716	Actinobacillus_suis	2501598	6	0	0			0
Soil_refseq	717	Actinobacillus_capsulatus	2621135	9	0	0			0
Soil_refseq	718	Actinobacillus_equuli	2451991	10	0	0			0
Soil_refseq	720	Actinobacillus_lignieresii	2236520	8	0	0			0
Soil_refseq	722	Actinobacillus_seminis	2467403	39	0	0			0
Soil_refseq	723	Actinobacillus_ureae	2492689	13	0	0			0
Soil_refseq	726	Haemophilus_haemolyticus	1934644	57	1	0.0175439	94.6667	23	0.00780505
Soil_refseq	727	Haemophilus_influenzae	1890662	49	0	0			0
Soil_refseq	728	Avibacterium_paragallinarum	2521134	45	0	0			0
Soil_refseq	729	Haemophilus_parainfluenzae	2141704	70	4	0.0571429	96.1305	6.75	0.0179763
Soil_refseq	730	#NAME?	1589620	16	0	0			0
Soil_refseq	731	Histophilus_somni	2263857	26	0	0			0
Soil_refseq	732	Aggregatibacter_aphrophilus	2337153	51	0	0			0
Soil_refseq	733	Canicola_haemoglobinophilus	2436406	12	0	0			0
Soil_refseq	734	Haemophilus_paracuniculus	2047249	43	0	0			0
Soil_refseq	735	Haemophilus_parahaemolyticus	2093459	19	0	0			0
Soil_refseq	736	Haemophilus_paraphrohaemolyticus	2138467	17	0	0			0
Soil_refseq	738	Glaesserella_parasuis	2313850	48	1	0.0208333	92.5926	2	0.00354388
Soil_refseq	739	Aggregatibacter_segnis	2022832	42	0	0			0
Soil_refseq	747	Pasteurella_multocida	2335516	68	0	0			0
Soil_refseq	750	Gallibacterium_anatis	2408630	53	0	0			0
Soil_refseq	751	Avibacterium_avium	2205360	8	0	0			0
Soil_refseq	752	Pasteurella_bettyae	2253160	3	0	0			0
Soil_refseq	753	Pasteurella_canis	2219635	5	0	0			0
Soil_refseq	754	Pasteurella_dagmatis	2287213	2	0	0			0
Soil_refseq	755	Avibacterium_gallinarum	2342758	10	0	0			0
Soil_refseq	756	Pasteurella_langaaensis	1989693	19	0	0			0
Soil_refseq	758	Rodentibacter_pneumotropicus	2434546	21	0	0			0
Soil_refseq	761	Pasteurella_testudinis	3029577	47	0	0			0
Soil_refseq	762	Avibacterium_volantium	2230476	5	0	0			0
Soil_refseq	769	Anaplasma_centrale	1206806	9	0	0			0
Soil_refseq	770	Anaplasma_marginale	1202435	31	0	0			0
Soil_refseq	774	Bartonella_bacilliformis	1445021	19	0	0			0
Soil_refseq	777	Coxiella_burnetii	2032807	54	4	0.0740741	96.5792	33	0.0149547
Soil_refseq	779	Ehrlichia_ruminantium	1516355	31	0	0			0
Soil_refseq	781	Rickettsia_conorii	1268755	2	0	0			0
Soil_refseq	782	Rickettsia_prowazekii	1109804	3	0	0			0
Soil_refseq	784	Orientia_tsutsugamushi	2078193	27	0	0			0
Soil_refseq	785	Rickettsia_typhi	1111496	3	0	0			0
Soil_refseq	786	Rickettsia_akari	1231060	4	0	0			0
Soil_refseq	787	Rickettsia_australis	1323280	4	0	0			0
Soil_refseq	788	Rickettsia_canadensis	1150228	11	0	0			0
Soil_refseq	803	Bartonella_quintana	1588683	16	0	0			0
Soil_refseq	807	Bartonella_elizabethae	2018538	2	0	0			0
Soil_refseq	813	Chlamydia_trachomatis	1042519	29	0	0			0
Soil_refseq	817	Bacteroides_fragilis	5241700	183	2	0.010929	92.3245	3	0.00244196
Soil_refseq	818	Bacteroides_thetaiotaomicron	6304193	137	1	0.00729927	96.8421	1	0.0015228
Soil_refseq	820	Bacteroides_uniformis	4920161	124	0	0			0
Soil_refseq	821	Phocaeicola_vulgatus	5163189	195	12	0.0615385	98.7918	34.6667	0.0184576
Soil_refseq	823	Parabacteroides_distasonis	5348976	116	0	0			0
Soil_refseq	824	Campylobacter_gracilis	2281652	47	0	0			0
Soil_refseq	826	Sebaldella_termitidis	4486650	18	1	0.0555556	95.3642	24	0.00338783
Soil_refseq	827	Campylobacter_ureolyticus	1820334	23	0	0			0
Soil_refseq	831	Butyrivibrio_fibrisolvens	4934347	49	0	0			0
Soil_refseq	833	Fibrobacter_succinogenes	3843004	23	0	0			0
Soil_refseq	837	Porphyromonas_gingivalis	2354886	74	0	0			0
Soil_refseq	839	Prevotella_ruminicola	3619559	106	0	0			0
Soil_refseq	840	Prevotella_loescheii	3508589	11	0	0			0
Soil_refseq	844	Wolinella_succinogenes	2150449	42	0	0			0
Soil_refseq	847	Oxalobacter_formigenes	2468871	186	1	0.00537634	96.6887	24	0.00615666
Soil_refseq	849	Fusobacterium_gonidiaformans	1678881	2	0	0			0
Soil_refseq	850	Fusobacterium_mortiferum	2716766	20	0	0			0
Soil_refseq	851	Fusobacterium_nucleatum	2180101	77	2	0.025974	98.6957	42	0.00532085
Soil_refseq	852	Fusobacterium_perfoetens	2103008	23	0	0			0
Soil_refseq	853	Faecalibacterium_prausnitzii	3127383	515	0	0			0
Soil_refseq	854	Fusobacterium_russii	1941804	4	0	0			0
Soil_refseq	856	Fusobacterium_varium	3346458	6	0	0			0
Soil_refseq	858	Fusobacterium_necrogenes	2015236	6	0	0			0
Soil_refseq	859	Fusobacterium_necrophorum	2288480	44	1	0.0227273	90.566	2	0.00235964
Soil_refseq	860	Fusobacterium_periodonticum	2615003	7	0	0			0
Soil_refseq	861	Fusobacterium_ulcerans	3537675	45	0	0			0
Soil_refseq	863	Syntrophomonas_wolfei	2936195	76	2	0.0263158	100	42	0.00282679
Soil_refseq	865	Pectinatus_frisingensis	2881049	28	0	0			0
Soil_refseq	867	Ruminobacter_amylophilus	2815061	2	0	0			0
Soil_refseq	870	Dichelobacter_nodosus	1389350	30	4	0.133333	97.8366	40.5	0.0326052
Soil_refseq	873	Desulfocurvibacter_africanus	4200534	727	4	0.00550206	94.1061	18.25	0.00978447
Soil_refseq	876	Desulfovibrio_desulfuricans	3554892	266	0	0			0
Soil_refseq	878	Solidesulfovibrio_fructosivorans	4673595	452	1	0.00221239	92.5	8	0.00256762
Soil_refseq	879	Megalodesulfovibrio_gigas	3796022	386	0	0			0
Soil_refseq	880	Maridesulfovibrio_salexigens	4289847	35	0	0			0
Soil_refseq	881	Desulfovibrio_vulgaris	3661391	84	0	0			0
Soil_refseq	886	Thermodesulfobacterium_thermophilum	1787382	11	7	0.636364	94.0633	18	0.0119169
Soil_refseq	889	Paucidesulfovibrio_longus	3701832	461	5	0.010846	95.2455	24.2	0.00659133
Soil_refseq	891	Desulfuromonas_acetoxidans	3828328	105	0	0			0
Soil_refseq	894	Desulfobulbus_propionicus	3851869	341	2	0.0058651	92.5926	3	0.0028298
Soil_refseq	897	Desulfococcus_multivorans	4455976	319	7	0.0219436	95.8885	24.4286	0.0159337
Soil_refseq	899	Desulfomicrobium_baculatum	3942657	170	0	0			0
Soil_refseq	901	Desulfovibrio_piger	2582155	504	0	0			0
Soil_refseq	905	Acidaminococcus_fermentans	2329769	150	0	0			0
Soil_refseq	907	Megasphaera_elsdenii	2478942	96	0	0			0
Soil_refseq	912	Nitrobacter_hamburgensis	5011522	930	143	0.153763	94.7031	19.2168	0.266646
Soil_refseq	913	Nitrobacter_winogradskyi	3402093	3759	2176	0.578877	97.6914	32.614	6.28099
Soil_refseq	915	Nitrosomonas_europaea	2812094	195	24	0.123077	95.1596	23.25	0.0831409
Soil_refseq	916	Nitrosomonas_eutropha	2781824	218	27	0.123853	93.4423	12.7407	0.0968789
Soil_refseq	917	Nitrosomonas_marina	3496909	196	2	0.0102041	95.1807	23	0.00240212
Soil_refseq	920	Acidithiobacillus_ferrooxidans	2982397	283	2	0.00706714	94.1176	23	0.00288359
Soil_refseq	921	Starkeya_novella	4765023	1024	25	0.0244141	94.0896	16.6	0.0380691
Soil_refseq	923	Guyparkeria_hydrothermalis	2433989	866	297	0.342956	98.0433	36.835	1.31899
Soil_refseq	926	Thiomonas_intermedia	3343428	405	2	0.00493827	95.3125	24	0.00194411
Soil_refseq	927	Halothiobacillus_neapolitanus	2582886	212	23	0.108491	97.5298	37.4348	0.0219522
Soil_refseq	929	Thermithiobacillus_tepidarius	2958498	759	8	0.0105402	96.4322	23.25	0.0276154
Soil_refseq	930	Acidithiobacillus_thiooxidans	3415726	92	0	0			0
Soil_refseq	931	Thiobacillus_thioparus	3201518	408	6	0.0147059	93.659	14.8333	0.0214898
Soil_refseq	934	Thiomicrospira_pelophila	2108215	46	0	0			0
Soil_refseq	940	Hydrogenobacter_thermophilus	1742932	7	0	0			0
Soil_refseq	944	Ehrlichia_canis	1315030	2	0	0			0
Soil_refseq	945	Ehrlichia_chaffeensis	1176248	4	0	0			0
Soil_refseq	948	Anaplasma_phagocytophilum	1479407	17	0	0			0
Soil_refseq	949	Anaplasma_platys	1196811	12	0	0			0
Soil_refseq	950	Neorickettsia_risticii	879977	6	0	0			0
Soil_refseq	951	Neorickettsia_sennetsu	859006	15	0	0			0
Soil_refseq	954	Francisella_persica	1516676	12	2	0.166667	96.4706	1	0.00567029
Soil_refseq	955	Wolbachia_pipientis	1267781	16	0	0			0
Soil_refseq	959	Bdellovibrio_bacteriovorus	3782950	315	0	0			0
Soil_refseq	960	Bacteriovorax_stolpii	3810309	50	0	0			0
Soil_refseq	964	Herbaspirillum_seropedicae	5509723	378	0	0			0
Soil_refseq	966	Oceanospirillum_linum	3654430	107	0	0			0
Soil_refseq	971	Selenomonas_ruminantium	3387070	290	0	0			0
Soil_refseq	979	Cellulophaga_lytica	3765936	34	0	0			0
Soil_refseq	982	Saccharicrinis_fermentans	5982061	95	1	0.0105263	95.3642	24	0.00254093
Soil_refseq	983	Flavobacterium_flevense	4230539	187	0	0			0
Soil_refseq	984	Pedobacter_heparinus	5167383	64	0	0			0
Soil_refseq	985	Cytophaga_hutchinsonii	4433218	221	9	0.040724	96.1129	22.8889	0.0162861
Soil_refseq	986	Flavobacterium_johnsoniae	6096872	468	2	0.0042735	93.3333	8	0.0017386
Soil_refseq	987	Aquimarina_latercula	6245252	26	1	0.0384615	91.3907	3	0.00243385
Soil_refseq	988	Leeuwenhoekiella_marinoflava	4747764	295	4	0.0135593	93.0238	10.5	0.0110578
Soil_refseq	989	Marinilabilia_salmonicolor	4982627	388	0	0			0
Soil_refseq	990	Breznakibacter_xylanolyticus	4380952	147	1	0.00680272	98.0132	42	0.00346957
Soil_refseq	991	Flavobacterium_hydatis	5902573	83	0	0			0
Soil_refseq	995	Solitalea_canadensis	5202069	234	1	0.0042735	91.8033	3	0.00119183
Soil_refseq	996	Flavobacterium_columnare	3221278	198	0	0			0
Soil_refseq	997	Eisenibacter_elegans	4030713	171	0	0			0
Soil_refseq	998	Flexibacter_flexilis	4249974	122	0	0			0
Soil_refseq	999	Bernardetia_litoralis	4919337	142	0	0			0
Soil_refseq	1002	Hugenholtzia_roseola	4254862	138	0	0			0
Soil_refseq	1003	Thermoflexibacter_ruber	5504183	164	4	0.0243902	93.1308	6.75	0.00821194
Soil_refseq	1004	Chitinophaga_sancti	8421768	215	3	0.0139535	92.8344	9.66667	0.00435775
Soil_refseq	1006	Marivirga_tractuosa	4516490	267	9	0.0337079	94.9196	21.6667	0.0226503
Soil_refseq	1008	Saprospira_grandis	4400185	154	1	0.00649351	95.9459	1	0.00170447
Soil_refseq	1010	Sphingobacterium_mizutaii	4653048	32428	24309	0.74963	98.4797	38.3871	36.345
Soil_refseq	1014	Weeksella_virosa	2287133	36	13	0.361111	99.7962	42	0.0245722
Soil_refseq	1015	Bergeyella_zoohelcum	2331468	89	0	0			0
Soil_refseq	1017	Capnocytophaga_gingivalis	2838633	157	2	0.0127389	95.1613	23	0.00221938
Soil_refseq	1018	Capnocytophaga_ochracea	2612925	71	0	0			0
Soil_refseq	1019	Capnocytophaga_sputigena	2855148	116	2	0.0172414	100	42	0.00217152
Soil_refseq	1022	Beggiatoa_alba	4265146	75	0	0			0
Soil_refseq	1026	Marinoscillum_furvescens	5966820	294	4	0.0136054	94.6232	17.75	0.00677078
Soil_refseq	1027	Microscilla_marina	9771226	198	0	0			0
Soil_refseq	1028	Marivirga_sericea	4741005	202	16	0.0792079	94.2256	16.4375	0.0253322
Soil_refseq	1031	Thiothrix_nivea	4691711	249	0	0			0
Soil_refseq	1034	Afipia_clevelandensis	4399548	581	32	0.0550775	94.2715	18.5938	0.0625064
Soil_refseq	1035	Afipia_felis	4195257	623	10	0.0160514	93.4287	13.7	0.0295334
Soil_refseq	1044	Erythrobacter_longus	3602162	180	6	0.0333333	94.4865	22.5	0.0162402
Soil_refseq	1048	Marichromatium_gracile	3830035	443	2	0.00451467	92.7098	5.5	0.00759784
Soil_refseq	1049	Allochromatium_vinosum	3669074	442	0	0			0
Soil_refseq	1050	Thermochromatium_tepidum	2958290	413	11	0.0266344	94.6669	11.6364	0.029037
Soil_refseq	1052	Halorhodospira_halochloris	2834560	277	1	0.00361011	92.053	3	0.00536238
Soil_refseq	1053	Halorhodospira_halophila	2678452	648	4	0.00617284	94.0903	17.25	0.0124699
Soil_refseq	1054	Ectothiorhodospira_shaposhnikovii	3788226	502	20	0.0398406	95.7008	26.95	0.0407579
Soil_refseq	1057	Thiococcus_pfennigii	4076754	1360	5	0.00367647	93.1509	11	0.0162875
Soil_refseq	1058	Thiocapsa_roseopersicina	5386125	472	0	0			0
Soil_refseq	1061	Rhodobacter_capsulatus	3871920	1434	3	0.00209205	93.5411	16.3333	0.00532036
Soil_refseq	1063	Cereibacter_sphaeroides	4602977	2877	10	0.00347584	92.0183	4.4	0.0231155
Soil_refseq	1066	Rhodocyclus_tenuis	3854478	755	7	0.00927152	94.5519	20.2857	0.0130238
Soil_refseq	1067	Rhodocyclus_purpureus	3617966	725	4	0.00551724	93.2857	14.25	0.00818139
Soil_refseq	1069	Rhodomicrobium_vannielii	4014469	493	0	0			0
Soil_refseq	1071	Rhodopila_globiformis	7248147	1857	28	0.0150781	92.3025	7.14286	0.0323531
Soil_refseq	1074	Rhodoblastus_acidophilus	4711496	1458	9	0.00617284	92.8643	7.66667	0.011334
Soil_refseq	1075	Fuscovulum_blasticum	3706095	558	9	0.016129	94.4856	19.2222	0.0167562
Soil_refseq	1076	Rhodopseudomonas_palustris	5457289	5424	15	0.00276549	93.427	12.8	0.0249941
Soil_refseq	1079	Blastochloris_viridis	3724841	1014	16	0.0157791	94.1891	15.5625	0.0352498
Soil_refseq	1080	Afifella_marina	3963421	520	5	0.00961538	92.8958	9	0.0150375
Soil_refseq	1082	Magnetospirillum_fulvum	3805060	1060	4	0.00377358	92.1814	5.5	0.00893547
Soil_refseq	1083	Magnetospirillum_molischianum	3805617	341	0	0			0
Soil_refseq	1084	Pararhodospirillum_photometricum	3876289	505	3	0.00594059	96.8271	35.6667	0.00322473
Soil_refseq	1085	Rhodospirillum_rubrum	4406557	1034	3	0.00290135	94.2631	13.3333	0.00805618
Soil_refseq	1086	Rhodothalassium_salexigens	3358756	1494	33	0.0220884	95.0051	20.7879	0.0969109
Soil_refseq	1087	Rhodovibrio_salinarum	4176524	1293	11	0.00850735	93.413	16.2727	0.0254518
Soil_refseq	1088	Rhodovibrio_sodomensis	5750741	2207	25	0.0113276	93.5031	12.6	0.0329871
Soil_refseq	1092	Chlorobium_limicola	2763181	138	6	0.0434783	93.1555	9.83333	0.0149827
Soil_refseq	1094	Chlorobium_phaeovibrioides	2094018	83	2	0.0240964	95.6044	24	0.00439347
Soil_refseq	1096	Chlorobium_phaeobacteroides	3133902	54	0	0			0
Soil_refseq	1097	Chlorobaculum_tepidum	2154946	135	0	0			0
Soil_refseq	1098	Prosthecochloris_vibrioformis	2305678	20	2	0.1	98.4375	42	0.00281913
Soil_refseq	1100	Pelodictyon_luteolum	2364842	144	0	0			0
Soil_refseq	1102	Prosthecochloris_aestuarii	2579695	110	5	0.0454545	94.5284	18.8	0.0221732
Soil_refseq	1108	Chloroflexus_aurantiacus	5258541	323	2	0.00619195	96.685	40	0.00174953
Soil_refseq	1112	Erythrobacter_neustonensis	3090363	473	9	0.0190275	93.7481	16.2222	0.0241072
Soil_refseq	1122	Aphanothece_sacrum	4493232	15	0	0			0
Soil_refseq	1124	Chlorogloeopsis_fritschii	7751745	58	0	0			0
Soil_refseq	1126	Microcystis_aeruginosa	5263219	246	0	0			0
Soil_refseq	1147	Synechocystis_sp._PCC_6714	3738889	1	0	0			0
Soil_refseq	1160	Planktothrix_agardhii	4904228	53	0	0			0
Soil_refseq	1164	Trichormus_azollae	5486145	24	0	0			0
Soil_refseq	1166	Dolichospermum_flos-aquae	5220684	18	0	0			0
Soil_refseq	1176	Aphanizomenon_flos-aquae	4347270	8	0	0			0
Soil_refseq	1178	Nostoc_commune	8198700	77	7	0.0909091	96.9577	31.7143	0.0114652
Soil_refseq	1179	Desmonostoc_muscorum	9635616	33	1	0.030303	99.3377	42	0.00157748
Soil_refseq	1184	Leptolyngbya_boryana	6803468	3	0	0			0
Soil_refseq	1202	Leptolyngbya_ectocarpi	6774485	51	0	0			0
Soil_refseq	1219	Prochlorococcus_marinus	1704176	186	0	0			0
Soil_refseq	1223	Prochlorothrix_hollandica	5646343	84	0	0			0
Soil_refseq	1229	Nitrosococcus_oceani	3522111	62138	53091	0.854405	96.6863	32.3076	65.4983
Soil_refseq	1231	Nitrosospira_multiformis	3234309	5285	2121	0.401325	95.5875	25.4215	6.5734
Soil_refseq	1233	Nitrosovibrio_tenuis	3098034	415	17	0.0409639	94.8912	19.5294	0.0439956
Soil_refseq	1238	Piscirickettsia_salmonis	3351503	73	0	0			0
Soil_refseq	1244	Leuconostoc_gelidum	1893499	20	0	0			0
Soil_refseq	1245	Leuconostoc_mesenteroides	2075763	46	6	0.130435	99.0022	41.6667	0.0291941
Soil_refseq	1246	Leuconostoc_lactis	1791608	17	0	0			0
Soil_refseq	1247	Oenococcus_oeni	1892074	27	0	0			0
Soil_refseq	1249	Weissella_paramesenteroides	2007410	17	2	0.117647	98.5507	42	0.00348708
Soil_refseq	1251	Leuconostoc_fallax	1660517	24	12	0.5	99.5124	41.8333	0.0473949
Soil_refseq	1252	Leuconostoc_carnosum	1701333	11	2	0.181818	99.2248	42	0.00764107
Soil_refseq	1254	Pediococcus_acidilactici	2044083	39	0	0			0
Soil_refseq	1255	Pediococcus_pentosaceus	1832387	10	0	0			0
Soil_refseq	1258	Peptoniphilus_asaccharolyticus	2320207	8	0	0			0
Soil_refseq	1260	Finegoldia_magna	1838801	45	2	0.0444444	98.4252	42	0.00696106
Soil_refseq	1261	Peptostreptococcus_anaerobius	2083092	10	0	0			0
Soil_refseq	1264	Ruminococcus_albus	4482087	123	0	0			0
Soil_refseq	1265	Ruminococcus_flavefaciens	3587803	217	0	0			0
Soil_refseq	1267	Sarcina_ventriculi	2549638	15	6	0.4	98.8201	42	0.0195714
Soil_refseq	1270	Micrococcus_luteus	2495693	2942	14	0.00475867	94.5173	18.2857	0.0599032
Soil_refseq	1272	Kocuria_varians	2843576	740	14	0.0189189	94.3472	20.2857	0.0535242
Soil_refseq	1273	Micrococcus_lylae	2670883	324	24	0.0740741	96.1875	31	0.0927034
Soil_refseq	1274	Dermacoccus_nishinomiyaensis	3113642	536	19	0.0354478	95.9709	26.3158	0.0534744
Soil_refseq	1275	Kocuria_rosea	3953419	13508	7353	0.544344	97.3225	34.9271	17.3363
Soil_refseq	1276	Kytococcus_sedentarius	2783568	1609	76	0.0472343	95.0838	22.9605	0.211635
Soil_refseq	1280	Staphylococcus_aureus	2821361	1650	7	0.00424242	97.5229	1	0.0219398
Soil_refseq	1281	Staphylococcus_carnosus	2571374	12	0	0			0
Soil_refseq	1282	Staphylococcus_epidermidis	2491058	317	1	0.00315457	100	42	0.00610183
Soil_refseq	1283	Staphylococcus_haemolyticus	2572027	185	2	0.0108108	93.1298	3	0.00513214
Soil_refseq	1284	Staphylococcus_hyicus	2472129	22	0	0			0
Soil_refseq	1285	Staphylococcus_intermedius	2891525	8	0	0			0
Soil_refseq	1286	Staphylococcus_simulans	2682239	29	0	0			0
Soil_refseq	1288	Staphylococcus_xylosus	2757557	83	21	0.253012	97.5733	37.6667	0.057696
Soil_refseq	1290	Staphylococcus_hominis	2257431	36	2	0.0555556	95.0527	24	0.0130237
Soil_refseq	1292	Staphylococcus_warneri	2541629	56	0	0			0
Soil_refseq	1293	Staphylococcus_gallinarum	2942339	35	0	0			0
Soil_refseq	1294	Staphylococcus_muscae	2095116	13	0	0			0
Soil_refseq	1296	Mammaliicoccus_sciuri	2811859	207	91	0.439614	98.1658	38.9231	0.260433
Soil_refseq	1299	Deinococcus_radiodurans	3279598	376	0	0			0
Soil_refseq	1302	Streptococcus_gordonii	2187618	39	3	0.0769231	96.9036	30.6667	0.0104223
Soil_refseq	1303	Streptococcus_oralis	1931548	67	0	0			0
Soil_refseq	1304	Streptococcus_salivarius	2210574	73	2	0.0273973	95.6667	31.5	0.00940932
Soil_refseq	1305	Streptococcus_sanguinis	2296927	83	0	0			0
Soil_refseq	1307	Streptococcus_suis	2170808	278	0	0			0
Soil_refseq	1308	Streptococcus_thermophilus	1791634	24	6	0.25	100	42	0.0111072
Soil_refseq	1309	Streptococcus_mutans	2019345	34	2	0.0588235	100	42	0.00366455
Soil_refseq	1310	Streptococcus_sobrinus	2198571	42	2	0.047619	99.1935	42	0.00632229
Soil_refseq	1311	Streptococcus_agalactiae	2079123	114	1	0.00877193	96.6887	1	0.00731077
Soil_refseq	1313	Streptococcus_pneumoniae	2110968	202	1	0.0049505	96.7742	1	0.00445293
Soil_refseq	1314	Streptococcus_pyogenes	1746380	102	1	0.00980392	96.2963	1	0.00314937
Soil_refseq	1317	Streptococcus_downei	2232110	1	0	0			0
Soil_refseq	1318	Streptococcus_parasanguinis	2153652	52	0	0			0
Soil_refseq	1322	Blautia_hansenii	3065949	49	0	0			0
Soil_refseq	1323	Faecalicoccus_pleomorphus	2055154	41	0	0			0
Soil_refseq	1326	Streptococcus_acidominimus	2445682	15	0	0			0
Soil_refseq	1328	Streptococcus_anginosus	1953654	14	0	0			0
Soil_refseq	1329	Streptococcus_canis	2084744	16	0	0			0
Soil_refseq	1333	Streptococcus_criceti	2431956	2	0	0			0
Soil_refseq	1334	Streptococcus_dysgalactiae	2174327	10	0	0			0
Soil_refseq	1335	Streptococcus_equinus	1797051	36	0	0			0
Soil_refseq	1336	Streptococcus_equi	2154778	108	0	0			0
Soil_refseq	1337	Streptococcus_hyointestinalis	2553358	17	0	0			0
Soil_refseq	1338	Streptococcus_intermedius	1932951	11	0	0			0
Soil_refseq	1339	Streptococcus_macacae	1930691	16	0	0			0
Soil_refseq	1340	Streptococcus_porcinus	2033046	17	0	0			0
Soil_refseq	1341	Streptococcus_ratti	2096943	2	0	0			0
Soil_refseq	1343	Streptococcus_vestibularis	1950305	6	0	0			0
Soil_refseq	1345	Streptococcus_ferus	1872314	13	0	0			0
Soil_refseq	1346	Streptococcus_iniae	2086959	20	0	0			0
Soil_refseq	1348	Streptococcus_parauberis	2164480	24	0	0			0
Soil_refseq	1349	Streptococcus_uberis	1975601	44	0	0			0
Soil_refseq	1351	Enterococcus_faecalis	2870381	251	0	0			0
Soil_refseq	1352	Enterococcus_faecium	2919198	190	0	0			0
Soil_refseq	1353	Enterococcus_gallinarum	3488294	33	0	0			0
Soil_refseq	1354	Enterococcus_hirae	2845651	123	0	0			0
Soil_refseq	1355	Enterococcus_columbae	2545099	9	0	0			0
Soil_refseq	1356	Enterococcus_sulfureus	2301651	14	0	0			0
Soil_refseq	1358	Lactococcus_lactis	2639081	951	5	0.00525762	96.1053	28	0.0143232
Soil_refseq	1359	Lactococcus_cremoris	2427048	24	0	0			0
Soil_refseq	1363	Lactococcus_garvieae	2084337	31	0	0			0
Soil_refseq	1364	Lactococcus_piscium	2405003	7	0	0			0
Soil_refseq	1365	Lactococcus_plantarum	1977763	13	0	0			0
Soil_refseq	1366	Lactococcus_raffinolactis	2295672	15	0	0			0
Soil_refseq	1371	Marinococcus_halophilus	3266249	91	8	0.0879121	96.9602	32.5	0.00820513
Soil_refseq	1373	Planococcus_citreus	3429284	6843	6381	0.932486	98.8964	39.7699	16.3023
Soil_refseq	1374	Planococcus_kocurii	3485580	52	23	0.442308	94.936	20.8261	0.0577522
Soil_refseq	1376	Aerococcus_urinae	1974262	72	0	0			0
Soil_refseq	1377	Aerococcus_viridans	2199877	312	37	0.11859	96.5805	29.973	0.145826
Soil_refseq	1379	Gemella_haemolysans	1905342	21	0	0			0
Soil_refseq	1382	Lancefieldella_parvula	1543805	35	2	0.0571429	100	42	0.007773
Soil_refseq	1383	Lancefieldella_rimae	1626291	20	0	0			0
Soil_refseq	1390	Bacillus_amyloliquefaciens	4149690	49	0	0			0
Soil_refseq	1391	Aneurinibacillus_aneurinilyticus	5313859	50	0	0			0
Soil_refseq	1392	Bacillus_anthracis	5503926	27	2	0.0740741	97.351	41	0.00552333
Soil_refseq	1393	Brevibacillus_brevis	6726998	99	0	0			0
Soil_refseq	1396	Bacillus_cereus	5836971	482	10	0.0207469	95.9515	30.4	0.0193594
Soil_refseq	1397	Niallia_circulans	5179558	135	4	0.0296296	98.4593	21.5	0.00660288
Soil_refseq	1398	Weizmannia_coagulans	3366995	138	0	0			0
Soil_refseq	1399	Cytobacillus_firmus	4803910	1198	490	0.409015	95.7494	26.8286	1.09288
Soil_refseq	1401	Paenibacillus_lautus	7062432	160	4	0.025	93.0451	5.5	0.00651334
Soil_refseq	1402	Bacillus_licheniformis	4227253	75	16	0.213333	98.9814	39.4375	0.0331894
Soil_refseq	1404	Priestia_megaterium	5746548	334	14	0.0419162	98.7544	36.5	0.0204993
Soil_refseq	1405	Bacillus_mycoides	5697065	63	0	0			0
Soil_refseq	1406	Paenibacillus_polymyxa	5967522	112	3	0.0267857	93.5022	2.33333	0.00395474
Soil_refseq	1407	Peribacillus_psychrosaccharolyticus	4681292	45	1	0.0222222	96.0265	24	0.00324697
Soil_refseq	1408	Bacillus_pumilus	3704641	168	0	0			0
Soil_refseq	1409	Bacillus_sp._-in-_Bacteria-	3584858	7	0	0			0
Soil_refseq	1411	Alkalihalobacillus_akibai	4740369	49	4	0.0816327	93.2082	8.25	0.00829049
Soil_refseq	1413	Evansella_cellulosilytica	4681672	37	0	0			0
Soil_refseq	1418	Caldalkalibacillus_mannanilyticus	4534596	47	3	0.0638298	94.3097	8	0.0036828
Soil_refseq	1421	Lysinibacillus_sphaericus	4681723	72	0	0			0
Soil_refseq	1422	Geobacillus_stearothermophilus	2744723	39	0	0			0
Soil_refseq	1423	Bacillus_subtilis	4215606	212	8	0.0377358	95.3276	26.875	0.0181943
Soil_refseq	1426	Parageobacillus_thermoglucosidasius	4004923	64	2	0.03125	100	42	0.00289644
Soil_refseq	1428	Bacillus_thuringiensis	6260142	207	8	0.0386473	94.7218	20.625	0.0145524
Soil_refseq	1445	Alkalihalobacillus_alcalophilus	4210001	54	1	0.0185185	95.3642	24	0.00361045
Soil_refseq	1449	Amphibacillus_xylanus	2569486	102	54	0.529412	98.5948	38.7593	0.137576
Soil_refseq	1450	Alicyclobacillus_acidoterrestris	4346939	50	0	0			0
Soil_refseq	1451	Paenibacillus_amylolyticus	7361451	53	0	0			0
Soil_refseq	1452	Bacillus_atrophaeus	4292910	77	4	0.0519481	99.5011	42	0.00873533
Soil_refseq	1454	Schinkia_azotoformans	4472104	73	1	0.0136986	94.702	23	0.00339885
Soil_refseq	1455	Bacillus_badius	3963196	100	16	0.16	97.0682	35.75	0.0348204
Soil_refseq	1456	Bacillus_benzoevorans	4701532	65	1	0.0153846	92.053	3	0.00323299
Soil_refseq	1458	Metabacillus_fastidiosus	4410645	50	2	0.04	93.0243	5.5	0.00417173
Soil_refseq	1459	Sporosarcina_globispora	5673948	51	12	0.235294	95.657	15.9167	0.0177302
Soil_refseq	1461	Psychrobacillus_insolitus	3288307	77	25	0.324675	95.178	22.4	0.0676336
Soil_refseq	1462	Geobacillus_kaustophilus	3592666	35	0	0			0
Soil_refseq	1464	Paenibacillus_larvae	4378174	50	0	0			0
Soil_refseq	1465	Brevibacillus_laterosporus	5400144	69	0	0			0
Soil_refseq	1467	Lederbergia_lenta	4384366	61	9	0.147541	97.6933	37	0.0136166
Soil_refseq	1471	Bacillus_methanolicus	3426513	154	2	0.012987	96.3585	32	0.00595357
Soil_refseq	1472	Paenibacillus_pabuli	7329063	91	0	0			0
Soil_refseq	1473	Virgibacillus_pantothenticus	4761851	70	9	0.128571	94.959	23.8889	0.0141962
Soil_refseq	1474	Sporosarcina_pasteurii	3298318	37	0	0			0
Soil_refseq	1476	Sporosarcina_psychrophila	4674191	6	0	0			0
Soil_refseq	1478	Peribacillus_simplex	5645783	194	26	0.134021	95.3767	25.6538	0.0536684
Soil_refseq	1479	Bacillus_smithii	3381292	96	3	0.03125	96.2028	28.6667	0.0116524
Soil_refseq	1482	Virgibacillus_halodenitrificans	3917759	1509	1193	0.79059	98.67	38.9128	2.76799
Soil_refseq	1484	Hydrogenibacillus_schlegelii	2608908	147	0	0			0
Soil_refseq	1488	Clostridium_acetobutylicum	4145581	2	0	0			0
Soil_refseq	1490	Paraclostridium_bifermentans	3566216	60	4	0.0666667	96.9625	33	0.00841228
Soil_refseq	1491	Clostridium_botulinum	3903260	177	1	0.00564972	92.1739	3	0.00297187
Soil_refseq	1492	Clostridium_butyricum	4705596	74	7	0.0945946	95.2172	13.7143	0.0147696
Soil_refseq	1493	Clostridium_cellulovorans	5262222	18	0	0			0
Soil_refseq	1494	Clostridium_cochlearium	2435419	38	7	0.184211	99.0482	39.2857	0.0178614
Soil_refseq	1495	Clostridium_cylindrosporum	2735032	9	0	0			0
Soil_refseq	1496	Clostridioides_difficile	4095894	502	3	0.0059761	95.0025	1.33333	0.00712909
Soil_refseq	1497	Clostridium_formicaceticum	4586728	24	1	0.0416667	92.7152	3	0.00331391
Soil_refseq	1498	Hathewaya_histolytica	2740791	16	0	0			0
Soil_refseq	1499	Ruminiclostridium_josui	4469680	21	0	0			0
Soil_refseq	1501	Clostridium_pasteurianum	4352852	55	0	0			0
Soil_refseq	1502	Clostridium_perfringens	3355233	249	11	0.0441767	98.547	40	0.039729
Soil_refseq	1503	Gottschalkia_purinilytica	3397304	7	0	0			0
Soil_refseq	1504	Clostridium_septicum	3404718	22	2	0.0909091	95.6954	2	0.00892879
Soil_refseq	1505	Paeniclostridium_sordellii	3534945	104	1	0.00961538	94.186	23	0.00246114
Soil_refseq	1509	Clostridium_sporogenes	4141984	48	0	0			0
Soil_refseq	1510	Thermoclostridium_stercorarium	2974379	34	2	0.0588235	95.0617	23	0.00275688
Soil_refseq	1511	Acetoanaerobium_sticklandii	2715461	5	0	0			0
Soil_refseq	1512	#NAME?	5072209	81	0	0			0
Soil_refseq	1513	Clostridium_tetani	2873333	24	0	0			0
Soil_refseq	1515	Acetivibrio_thermocellus	3843301	35	4	0.114286	94.6131	21.5	0.00915879
Soil_refseq	1516	Thermoanaerobacter_thermohydrosulfuricus	2683588	1	0	0			0
Soil_refseq	1517	Thermoanaerobacterium_thermosaccharolyticum	2785752	29	0	0			0
Soil_refseq	1519	Clostridium_tyrobutyricum	3134437	49	0	0			0
Soil_refseq	1520	Clostridium_beijerinckii	5950247	91	1	0.010989	97.3333	1	0.00253771
Soil_refseq	1521	Ruminiclostridium_cellulolyticum	4068724	11	0	0			0
Soil_refseq	1522	#NAME?	4513882	43	0	0			0
Soil_refseq	1525	Moorella_thermoacetica	2623349	223	0	0			0
Soil_refseq	1526	#NAME?	3113820	95	0	0			0
Soil_refseq	1527	Anaerocolumna_aminovalerica	4630141	23	0	0			0
Soil_refseq	1528	Eubacterium_barkeri	2954329	25	6	0.24	95.4551	22.6667	0.0123209
Soil_refseq	1529	Clostridium_cadaveris	3625784	23	1	0.0434783	92.6174	3	0.00413704
Soil_refseq	1531	Enterocloster_clostridioformis	5539047	66	0	0			0
Soil_refseq	1532	Blautia_coccoides	6097890	2	0	0			0
Soil_refseq	1533	Clostridium_fallax	2747337	8	2	0.25	91.6667	3	0.00396748
Soil_refseq	1534	Clostridium_kluyveri	3955303	43	0	0			0
Soil_refseq	1537	Romboutsia_lituseburensis	3782458	40	1	0.025	95.4248	24	0.00407143
Soil_refseq	1538	Clostridium_ljungdahlii	4630065	7	0	0			0
Soil_refseq	1540	Clostridioides_mangenotii	2960967	32	0	0			0
Soil_refseq	1541	Terrisporobacter_mayombei	4064271	56	5	0.0892857	94.0203	13.4	0.0157716
Soil_refseq	1542	Clostridium_novyi	2499078	18	0	0			0
Soil_refseq	1544	Faecalicatena_orotica	5187896	8	0	0			0
Soil_refseq	1547	Erysipelatoclostridium_ramosum	3543719	21	0	0			0
Soil_refseq	1548	Clostridium_scatologenes	5749410	12	0	0			0
Soil_refseq	1553	Clostridium_tetanomorphum	4475070	29	0	0			0
Soil_refseq	1556	Gottschalkia_acidurici	3108248	22	0	0			0
Soil_refseq	1557	Peptoclostridium_litorale	3404633	36	0	0			0
Soil_refseq	1559	Clostridium_tertium	3874184	30	0	0			0
Soil_refseq	1561	Clostridium_baratii	3211717	56	1	0.0178571	92.7152	3	0.00473267
Soil_refseq	1563	Desulfosporosinus_orientis	5863081	26	0	0			0
Soil_refseq	1564	Desulforamulus_ruminis	3969014	54	0	0			0
Soil_refseq	1565	Desulfotomaculum_nigrificans	2892255	50	0	0			0
Soil_refseq	1566	Desulfofundulus_australicus	2881643	21	1	0.047619	90.2913	2	0.00360905
Soil_refseq	1570	Halobacillus_halophilus	4170008	82	0	0			0
Soil_refseq	1571	Sporosarcina_ureae	3362333	21	0	0			0
Soil_refseq	1575	Leifsonia_xyli	2686418	1226	5	0.0040783	91.5602	3	0.023228
Soil_refseq	1579	Lactobacillus_acidophilus	1978847	11	0	0			0
Soil_refseq	1580	Levilactobacillus_brevis	2494328	163	0	0			0
Soil_refseq	1581	Lentilactobacillus_buchneri	2537205	10	0	0			0
Soil_refseq	1582	Lacticaseibacillus_casei	2952961	19	0	0			0
Soil_refseq	1583	Weissella_confusa	2216758	152	6	0.0394737	96.6398	30	0.0180895
Soil_refseq	1584	Lactobacillus_delbrueckii	1891796	59	0	0			0
Soil_refseq	1587	Lactobacillus_helveticus	2055814	28	3	0.107143	96.3648	34.3333	0.00739366
Soil_refseq	1588	Lentilactobacillus_hilgardii	3190226	24	0	0			0
Soil_refseq	1589	Lactiplantibacillus_pentosus	3671373	54	0	0			0
Soil_refseq	1590	Lactiplantibacillus_plantarum	3223643	38	0	0			0
Soil_refseq	1596	Lactobacillus_gasseri	1894360	10	0	0			0
Soil_refseq	1597	Lacticaseibacillus_paracasei	3025352	77	0	0			0
Soil_refseq	1598	Limosilactobacillus_reuteri	2220255	99	3	0.030303	95.3915	29	0.0126112
Soil_refseq	1599	Latilactobacillus_sakei	2018071	35	10	0.285714	97.7319	34.8	0.0359749
Soil_refseq	1600	Lactobacillus_acetotolerans	1683905	10	0	0			0
Soil_refseq	1601	Ligilactobacillus_agilis	2162388	36	6	0.166667	98.1116	31.6667	0.0125787
Soil_refseq	1602	Companilactobacillus_alimentarius	2401923	5	0	0			0
Soil_refseq	1604	Lactobacillus_amylovorus	1977087	11	0	0			0
Soil_refseq	1605	Ligilactobacillus_animalis	1906794	36	2	0.0555556	100	42	0.00325153
Soil_refseq	1606	Ligilactobacillus_aviarius	1680526	29	0	0			0
Soil_refseq	1607	Loigolactobacillus_bifermentans	3274863	12	0	0			0
Soil_refseq	1610	Loigolactobacillus_coryniformis	2951508	81	14	0.17284	97.0934	33.3571	0.0222259
Soil_refseq	1612	Companilactobacillus_farciminis	2551839	9	3	0.333333	95.1622	28.6667	0.0106198
Soil_refseq	1613	Limosilactobacillus_fermentum	2103331	136	4	0.0294118	97.7339	41	0.0155468
Soil_refseq	1614	Fructilactobacillus_fructivorans	1332231	7	0	0			0
Soil_refseq	1615	Weissella_halotolerans	1358385	11	0	0			0
Soil_refseq	1616	Weissella_kandleri	1334438	11	0	0			0
Soil_refseq	1618	Liquorilactobacillus_mali	2611959	15	0	0			0
Soil_refseq	1620	Weissella_minor	1768499	11	0	0			0
Soil_refseq	1622	Ligilactobacillus_murinus	2290452	29	2	0.0689655	96.0132	4	0.00855726
Soil_refseq	1623	Ligilactobacillus_ruminis	2066652	62	0	0			0
Soil_refseq	1624	Ligilactobacillus_salivarius	2071255	58	0	0			0
Soil_refseq	1625	Fructilactobacillus_sanfranciscensis	1360847	14	0	0			0
Soil_refseq	1626	Lacticaseibacillus_sharpeae	2444304	46	0	0			0
Soil_refseq	1629	Weissella_viridescens	1593241	16	0	0			0
Soil_refseq	1630	Kandleria_vitulina	2126709	20	0	0			0
Soil_refseq	1631	Fructobacillus_fructosus	1401260	8	0	0			0
Soil_refseq	1632	Limosilactobacillus_oris	2007883	81	0	0			0
Soil_refseq	1633	Limosilactobacillus_vaginalis	1883554	5	0	0			0
Soil_refseq	1638	Listeria_ivanovii	2919548	19	0	0			0
Soil_refseq	1639	Listeria_monocytogenes	2944528	345	4	0.0115942	95.205	1.25	0.0147052
Soil_refseq	1640	Listeria_seeligeri	2797636	37	1	0.027027	87.1429	2	0.00253786
Soil_refseq	1641	Listeria_grayi	2751104	31	0	0			0
Soil_refseq	1642	Listeria_innocua	2887185	35	0	0			0
Soil_refseq	1643	Listeria_welshimeri	2814137	33	1	0.030303	99.0099	1	0.00362456
Soil_refseq	1646	Renibacterium_salmoninarum	3155250	128	0	0			0
Soil_refseq	1648	Erysipelothrix_rhusiopathiae	1787941	8	0	0			0
Soil_refseq	1650	Kurthia_zopfii	2991625	20	0	0			0
Soil_refseq	1652	Alloiococcus_otitis	1806596	28	0	0			0
Soil_refseq	1655	Actinomyces_naeslundii	3152123	883	6	0.00679502	92.5197	9.66667	0.0167189
Soil_refseq	1656	Actinomyces_viscosus	3491241	344	13	0.0377907	93.1214	7.23077	0.0045829
Soil_refseq	1657	Actinobaculum_suis	2368602	176	0	0			0
Soil_refseq	1658	Actinomyces_bovis	2595566	300	2	0.00666667	93	5.5	0.00624141
Soil_refseq	1659	Actinomyces_israelii	3980311	1019	16	0.0157017	94.823	22.5	0.0291937
Soil_refseq	1660	Schaalia_odontolytica	2455831	923	5	0.00541712	97.0798	31.4	0.0145368
Soil_refseq	1661	Trueperella_pyogenes	2295822	422	1	0.00236967	90.1316	2	0.00662072
Soil_refseq	1664	Arthrobacter_glacialis	4249516	435	9	0.0206897	94.2137	20.5556	0.0211318
Soil_refseq	1665	Arthrobacter_globiformis	4954410	1371	50	0.0364697	94.0963	17.32	0.102959
Soil_refseq	1667	Arthrobacter_sp.	3482028	213	0	0			0
Soil_refseq	1670	Arthrobacter_citreus	3553729	542	4	0.00738007	94.9027	23.25	0.00337673
Soil_refseq	1671	Pseudarthrobacter_oxydans	4269059	162	36	0.222222	93.9345	14.3611	0.108174
Soil_refseq	1672	Arthrobacter_ramosus	5251250	322	17	0.052795	94.1355	17.5294	0.0332683
Soil_refseq	1673	Rhizobium_viscosum	7069622	384	10	0.0260417	94.3127	18.8	0.0109907
Soil_refseq	1676	Pseudarthrobacter_polychromogenes	4384456	828	353	0.426329	94.9583	21.8102	0.889711
Soil_refseq	1677	Arthrobacter_pascens	4634886	1242	279	0.224638	94.4026	18.0681	0.686058
Soil_refseq	1680	Bifidobacterium_adolescentis	2089645	290	5	0.0172414	94.1709	16.8	0.0201948
Soil_refseq	1681	Bifidobacterium_bifidum	2193720	464	2	0.00431034	98.7654	42	0.00373794
Soil_refseq	1683	Bifidobacterium_angulatum	2021974	106	0	0			0
Soil_refseq	1684	Bifidobacterium_asteroides	2190368	287	0	0			0
Soil_refseq	1685	Bifidobacterium_breve	2269415	214	2	0.00934579	96.9923	40	0.00299637
Soil_refseq	1686	Bifidobacterium_catenulatum	2079525	80	0	0			0
Soil_refseq	1687	Bifidobacterium_coryneforme	1755151	18	0	0			0
Soil_refseq	1688	Bifidobacterium_cuniculi	2531592	362	0	0			0
Soil_refseq	1689	Bifidobacterium_dentium	2635669	118	0	0			0
Soil_refseq	1691	Bifidobacterium_indicum	2280567	18	0	0			0
Soil_refseq	1692	Bifidobacterium_magnum	1825255	119	0	0			0
Soil_refseq	1693	Bifidobacterium_minimum	1867315	141	0	0			0
Soil_refseq	1694	Bifidobacterium_pseudolongum	1978157	1226	0	0			0
Soil_refseq	1697	Corynebacterium_ammoniagenes	2790185	760	38	0.05	98.911	38.5263	0.106624
Soil_refseq	1698	Brevibacterium_epidermidis	3703261	725	297	0.409655	98.2619	37.0101	0.840691
Soil_refseq	1703	Brevibacterium_linens	3814300	1324	179	0.135196	95.2595	22.514	0.496684
Soil_refseq	1705	Corynebacterium_stationis	2862233	372	239	0.642473	98.0036	37.523	0.655991
Soil_refseq	1708	Cellulomonas_fimi	4266344	5542	58	0.0104655	93.4054	11.7069	0.119657
Soil_refseq	1709	Cellulomonas_biazotea	4407465	2221	39	0.0175597	92.9852	9.23077	0.0604656
Soil_refseq	1710	Cellulosimicrobium_cellulans	4411608	13908	134	0.00963474	93.3139	10.597	0.234268
Soil_refseq	1711	Cellulomonas_flavigena	4123179	2314	23	0.0099395	93.371	13.8261	0.0393628
Soil_refseq	1712	Cellulomonas_gelida	3791351	305	4	0.0131148	92.0143	4.25	0.00799187
Soil_refseq	1713	Oerskovia_turbata	4025089	816	17	0.0208333	92.9973	9	0.0310552
Soil_refseq	1714	Cellulomonas_uda	3567340	531	3	0.00564972	94.4917	22	0.00818537
Soil_refseq	1717	Corynebacterium_diphtheriae	2463666	147	1	0.00680272	98.4615	1	0.00267893
Soil_refseq	1718	Corynebacterium_glutamicum	3309401	236	13	0.0550847	96.2974	21.6923	0.0373784
Soil_refseq	1719	Corynebacterium_pseudotuberculosis	2337763	41	0	0			0
Soil_refseq	1721	Corynebacterium_callunae	2928683	67	3	0.0447761	94.6873	18.6667	0.0101411
Soil_refseq	1724	Corynebacterium_renale	2335089	173	1	0.00578035	92.7152	8	0.00650939
Soil_refseq	1725	Corynebacterium_xerosis	2686219	1495	42	0.0280936	97.5923	33.4524	0.14191
Soil_refseq	1727	Corynebacterium_variabile	3192709	805	0	0			0
Soil_refseq	1731	Peptoclostridium_acidaminophilum	3055036	22	0	0			0
Soil_refseq	1732	Eubacterium_oxidoreducens	2912287	13	0	0			0
Soil_refseq	1735	Holdemanella_biformis	2477128	24	0	0			0
Soil_refseq	1736	Eubacterium_limosum	4422837	63	0	0			0
Soil_refseq	1737	#NAME?	2943107	7	1	0.142857	98.0132	42	0.00516461
Soil_refseq	1741	Thermodesulfobacterium_commune	1764045	4	0	0			0
Soil_refseq	1744	Propionibacterium_freudenreichii	2507188	1120	2	0.00178571	93.75	8	0.00259255
Soil_refseq	1747	Cutibacterium_acnes	2494738	163	43	0.263804	99.1173	40.9767	0.143342
Soil_refseq	1748	Acidipropionibacterium_acidipropionici	3651382	1333	108	0.0810203	97.6391	26.4074	0.253219
Soil_refseq	1749	Acidipropionibacterium_jensenii	2999408	1337	14	0.0104712	94.9565	23.6429	0.0247382
Soil_refseq	1750	Arachnia_propionica	3402349	2344	18	0.00767918	94.7664	21.6111	0.0282158
Soil_refseq	1751	Acidipropionibacterium_thoenii	2938072	366	32	0.0874317	96.9456	33.6562	0.0626942
Soil_refseq	1753	Propioniferax_innocua	2789160	670	9	0.0134328	93.2669	12.6667	0.0316941
Soil_refseq	1764	Mycobacterium_avium	5173839	1505	18	0.0119601	95.5559	22.6667	0.0317752
Soil_refseq	1766	Mycolicibacterium_fortuitum	6406072	1617	145	0.0896722	96.8978	32.5586	0.238617
Soil_refseq	1767	Mycobacterium_intracellulare	5645778	1675	6	0.00358209	93.8776	15.8333	0.00821853
Soil_refseq	1768	Mycobacterium_kansasii	6577228	435	1	0.00229885	96.8254	40	0.000973054
Soil_refseq	1769	Mycobacterium_leprae	3187112	117	2	0.017094	93.2692	8	0.00329452
Soil_refseq	1771	Mycolicibacterium_phlei	5313907	1948	178	0.0913758	96.7392	29.6292	0.298217
Soil_refseq	1772	Mycolicibacterium_smegmatis	6895172	2075	29	0.0139759	93.8998	15.7931	0.0390853
Soil_refseq	1773	Mycobacterium_tuberculosis	4411532	1590	22	0.0138365	94.7827	21.5	0.0396461
Soil_refseq	1774	Mycobacteroides_chelonae	5029817	852	5	0.00586854	96.6077	27.6	0.0074953
Soil_refseq	1775	Mycobacterium_cookii	5318517	783	18	0.0229885	94.0932	14.5556	0.0238036
Soil_refseq	1776	Mycolicibacterium_flavescens	5973602	1746	151	0.0864834	95.175	22.4503	0.278643
Soil_refseq	1777	Mycobacterium_gastri	5816659	331	3	0.00906344	93.7146	16.3333	0.00357594
Soil_refseq	1778	Mycobacterium_gordonae	7601632	3006	15	0.00499002	93.6349	13.5333	0.0134445
Soil_refseq	1780	Mycobacterium_malmoense	5319859	1383	10	0.00723066	92.9803	10.2	0.0207712
Soil_refseq	1781	Mycobacterium_marinum	6450522	582	1	0.00171821	92	3	0.0023409
Soil_refseq	1782	Mycolicibacter_nonchromogenicus	4465329	610	21	0.0344262	93.6515	15.619	0.0490669
Soil_refseq	1783	Mycobacterium_scrofulaceum	6170273	1180	6	0.00508475	94.2954	17.1667	0.0100644
Soil_refseq	1784	Mycobacterium_simiae	5788994	1409	8	0.00567779	93.305	12.625	0.0115391
Soil_refseq	1786	Mycolicibacterium_sphagni	6066978	1637	13	0.00794136	93.7325	15.6154	0.0171255
Soil_refseq	1787	Mycobacterium_szulgai	6672659	598	5	0.0083612	93.7378	16.2	0.00648917
Soil_refseq	1788	Mycolicibacter_terrae	4566186	981	174	0.17737	94.5719	19.2644	0.369849
Soil_refseq	1789	Mycobacterium_xenopi	5251936	814	6	0.00737101	92.7164	3.33333	0.0153277
Soil_refseq	1790	Mycobacterium_asiaticum	5969538	3775	8	0.00211921	93.4983	13.875	0.0159644
Soil_refseq	1791	Mycolicibacterium_aurum	6035584	1307	23	0.0175976	93.1345	11.0435	0.036699
Soil_refseq	1792	Mycolicibacterium_chitae	5461769	1829	143	0.0781848	96.8686	30.4545	0.254588
Soil_refseq	1793	Mycolicibacterium_fallax	4156821	1335	145	0.108614	98.5966	36.6552	0.299027
Soil_refseq	1794	Mycolicibacterium_gadium	5964999	860	77	0.0895349	94.2883	17.4286	0.121341
Soil_refseq	1795	Mycolicibacterium_neoaurum	5421267	2200	48	0.0218182	95.8499	26.2708	0.0776387
Soil_refseq	1796	Mycobacterium_senegalense	6086722	15	0	0			0
Soil_refseq	1797	Mycolicibacterium_thermoresistibile	4950685	62349	59486	0.954081	99.667	41.1842	66.7952
Soil_refseq	1798	Mycolicibacillus_trivialis	3591083	1284	262	0.20405	99.0717	40.3931	0.736018
Soil_refseq	1799	Mycolicibacterium_aichiense	5925482	626	5	0.00798722	94.2089	16.2	0.0114252
Soil_refseq	1800	Mycolicibacterium_chubuense	6021188	2115	16	0.00756501	93.2225	12	0.0258919
Soil_refseq	1801	Mycobacterium_diernhoferi	5998503	1176	17	0.0144558	93.3132	12.9412	0.0285738
Soil_refseq	1802	Mycolicibacterium_farcinogenes	6607534	129	3	0.0232558	98.1792	36	0.00334467
Soil_refseq	1804	Mycolicibacterium_gilvum	5783292	550	54	0.0981818	97.1047	31.5	0.0895684
Soil_refseq	1807	Mycolicibacterium_obuense	5599206	946	17	0.0179704	94.8897	21.1765	0.0302186
Soil_refseq	1809	Mycobacterium_ulcerans	6066298	133	0	0			0
Soil_refseq	1810	Mycolicibacterium_vaccae	6235754	1389	26	0.0187185	93.6452	15.3846	0.0385038
Soil_refseq	1814	Amycolatopsis_methanolica	7237391	959	21	0.0218978	94.8274	21.8571	0.0276757
Soil_refseq	1816	Actinokineospora_fastidiosa	7042850	623	70	0.11236	94.6353	20.3429	0.1144
Soil_refseq	1822	Nocardia_vaccinii	9224040	962	4	0.004158	93.5989	12.25	0.00444491
Soil_refseq	1823	Nocardia_otitidiscaviarum	7687583	2542	17	0.00668765	97.6152	35.1176	0.0156876
Soil_refseq	1824	Nocardia_asteroides	6983363	3930	12	0.00305344	93.5089	13.3333	0.00857753
Soil_refseq	1828	Rhodococcus_fascians	5519954	1013	0	0			0
Soil_refseq	1829	Rhodococcus_rhodochrous	5612657	2042	163	0.0798237	96.9864	33.7178	0.304063
Soil_refseq	1830	Rhodococcus_ruber	5698851	836	7	0.00837321	93.5182	17.2857	0.00935276
Soil_refseq	1833	Rhodococcus_erythropolis	6806506	648	4	0.00617284	97.8606	37.5	0.00752221
Soil_refseq	1836	Saccharopolyspora_erythraea	8212805	4564	59	0.0129273	93.67	13.4746	0.0614772
Soil_refseq	1837	Saccharopolyspora_hirsuta	7549392	1926	36	0.0186916	93.9678	16.0278	0.0373937
Soil_refseq	1838	Saccharopolyspora_hordei	5783988	1964	28	0.0142566	96.3773	26.8214	0.0637104
Soil_refseq	1841	Nocardioides_albus	5655249	3128	1171	0.374361	95.3894	25.0282	2.13872
Soil_refseq	1843	Nocardioides_jensenii	5102139	3925	348	0.0886624	95.3336	23.2241	0.603943
Soil_refseq	1844	Nocardioides_luteus	4956498	8474	836	0.0986547	94.2774	18.2392	1.72085
Soil_refseq	1848	Pseudonocardia_thermophila	6098214	4279	250	0.0584249	93.8802	14.744	0.386818
Soil_refseq	1850	Actinopolyspora_halophila	5353291	618	4	0.00647249	95.6127	27.75	0.00823792
Soil_refseq	1852	Saccharomonospora_viridis	4308349	64120	61292	0.955895	99.6704	41.5643	74.9442
Soil_refseq	1856	Frankia_torreyi	7624758	1	0	0			0
Soil_refseq	1858	Frankia_sp._ArI3	7541222	10	0	0			0
Soil_refseq	1861	Geodermatophilus_obscurus	5322497	10192	1946	0.190934	95.3835	24.7472	3.79747
Soil_refseq	1863	Dermatophilus_congolensis	2627820	385	1	0.0025974	94.1176	23	0.00197883
Soil_refseq	1866	Actinoplanes_missouriensis	8773466	2356	75	0.0318336	93.5179	14.24	0.0885739
Soil_refseq	1867	Actinoplanes_teichomyceticus	8287152	2372	61	0.0257167	94.0396	16.3279	0.0760213
Soil_refseq	1868	Actinoplanes_digitatis	9128557	4456	511	0.114677	94.3292	18.6732	0.582754
Soil_refseq	1869	Actinoplanes_utahensis	9417079	2717	184	0.0677218	94.9627	21.4837	0.216288
Soil_refseq	1874	Micromonospora_chalcea	6861996	1766	260	0.147225	95.5914	25.85	0.405028
Soil_refseq	1877	Micromonospora_echinospora	7125866	2038	70	0.0343474	95.6179	26.2286	0.106359
Soil_refseq	1880	Micromonospora_olivasterospora	7071760	1760	74	0.0420455	94.4172	19.1892	0.0902321
Soil_refseq	1881	Micromonospora_viridifaciens	7073985	1466	61	0.0416098	93.8458	16.3279	0.0806193
Soil_refseq	1885	Streptomyces_actuosus	8451480	1482	23	0.0155196	93.5576	14.0435	0.0249069
Soil_refseq	1886	Streptomyces_albidoflavus	7215712	1544	50	0.0323834	95.7497	27.42	0.0787864
Soil_refseq	1888	Streptomyces_albus	8033415	4411	3	0.000680118	92.5633	9.66667	0.00484227
Soil_refseq	1889	Streptomyces_ambofaciens	8393598	1463	131	0.089542	95.5525	25.1985	0.154785
Soil_refseq	1890	Streptomyces_antibioticus	7978920	1370	3	0.00218978	92.4442	3	0.00567746
Soil_refseq	1892	Streptomyces_anulatus	8847108	1125	58	0.0515556	95.2967	23.8621	0.0692769
Soil_refseq	1893	Streptomyces_atratus	9641288	2279	23	0.0100921	94.4426	17.2174	0.0254012
Soil_refseq	1894	Kitasatospora_aureofaciens	8323899	3004	0	0			0
Soil_refseq	1895	Streptomyces_avidinii	9032248	834	1	0.00119904	92.6667	23	0.00167179
Soil_refseq	1896	Streptomyces_bikiniensis	7391008	632	3	0.00474684	95.1288	24.3333	0.00615613
Soil_refseq	1898	Streptomyces_cacaoi	8443444	229	2	0.00873362	91.5631	3	0.00266479
Soil_refseq	1901	Streptomyces_clavuligerus	8544086	1901	9	0.00473435	92.9886	9.88889	0.00661276
Soil_refseq	1902	Streptomyces_coelicolor	8585353	1	0	0			0
Soil_refseq	1903	Streptomyces_corchorusii	10309547	207	7	0.0338164	93.8222	11.8571	0.00653763
Soil_refseq	1904	Streptomyces_cyaneus	9833661	896	31	0.0345982	95.3402	23.0645	0.0333548
Soil_refseq	1905	Streptomyces_exfoliatus	7874957	2828	13	0.00459689	94.3093	20.4615	0.0122413
Soil_refseq	1906	Streptomyces_fradiae	6725579	66	0	0			0
Soil_refseq	1907	Streptomyces_glaucescens	8426988	2174	69	0.0317387	94.4192	19.0725	0.0592501
Soil_refseq	1908	Streptomyces_globisporus	7783599	1033	12	0.0116167	94.1358	18.3333	0.0157639
Soil_refseq	1909	Streptomyces_griseolus	7537539	82	1	0.0121951	94.0397	23	0.00201657
Soil_refseq	1910	Streptomyces_griseosporeus	8163924	330	7	0.0212121	96.1414	28.2857	0.00841507
Soil_refseq	1911	Streptomyces_griseus	8328034	3596	12	0.00333704	93.6567	11.5	0.0170629
Soil_refseq	1912	Streptomyces_hygroscopicus	9682870	2109	9	0.00426743	93.1643	9.88889	0.00880937
Soil_refseq	1914	Streptomyces_lavendulae	8932792	1871	2	0.00106895	95.476	31.5	0.00128739
Soil_refseq	1915	Streptomyces_lincolnensis	10319054	2642	100	0.0378501	95.6703	25.83	0.102345
Soil_refseq	1916	Streptomyces_lividans	8318010	13	0	0			0
Soil_refseq	1919	Streptomyces_microflavus	8452583	312	6	0.0192308	96.1421	24.6667	0.00673167
Soil_refseq	1920	Streptomyces_nigrescens	9534571	862	2	0.00232019	92.8824	13	0.00248569
Soil_refseq	1921	Streptomyces_olivaceoviridis	9763431	388	3	0.00773196	95.9405	24.3333	0.00389207
Soil_refseq	1922	Streptomyces_plicatus	8368647	37	1	0.027027	98.6667	42	0.00180435
Soil_refseq	1923	Streptomyces_phaeochromogenes	11713170	714	9	0.012605	93.1337	9.33333	0.00944236
Soil_refseq	1924	Streptomyces_purpurascens	9188115	588	24	0.0408163	93.8664	14.6667	0.0197211
Soil_refseq	1927	Streptomyces_rimosus	9643891	2148	36	0.0167598	94.0692	16.2222	0.0434783
Soil_refseq	1928	Streptomyces_rochei	8181137	101	0	0			0
Soil_refseq	1929	Streptomyces_rubiginosus	7308697	56	6	0.107143	95.1221	20.3333	0.0106312
Soil_refseq	1930	Streptomyces_scabiei	10148695	2424	12	0.0049505	94.3327	17.5833	0.0156867
Soil_refseq	1932	Streptomyces_tendae	8887909	1185	47	0.0396624	94.6635	20.5319	0.0604529
Soil_refseq	1933	Streptoalloteichus_tenebrarius	7099767	2195	38	0.0173121	93.9652	16.9474	0.0470297
Soil_refseq	1934	Streptomyces_thermovulgaris	6021617	88	4	0.0454545	100	42	0.00592864
Soil_refseq	1935	Streptomyces_violaceoruber	8629698	132	0	0			0
Soil_refseq	1938	Streptomyces_viridochromogenes	7827744	2729	19	0.00696226	93.2764	11.1579	0.0259973
Soil_refseq	1940	Streptomyces_albireticuli	8564494	1087	11	0.0101196	94.9492	21.7273	0.00909569
Soil_refseq	1941	Streptomyces_badius	7515187	57	7	0.122807	97.0254	33.7143	0.0101927
Soil_refseq	1942	Streptomyces_goshikiensis	8161592	86	0	0			0
Soil_refseq	1943	Streptomyces_griseoruber	10217879	1334	28	0.0209895	93.9569	15.3214	0.0299769
Soil_refseq	1944	Streptomyces_halstedii	7849026	444	3	0.00675676	92.3852	4.66667	0.00480314
Soil_refseq	1945	Streptomyces_jumonjinensis	8465075	548	6	0.0109489	93.5253	16.3333	0.00911982
Soil_refseq	1946	Streptomyces_kasugaensis	9262443	512	7	0.0136719	93.0494	6.42857	0.00833473
Soil_refseq	1950	Streptomyces_peucetius	9528656	1006	5	0.00497018	92.6957	4	0.00476458
Soil_refseq	1951	Streptomyces_purpureus	7458334	1466	15	0.0102319	93.3552	11.8	0.0200849
Soil_refseq	1952	Streptomyces_thermoviolaceus	6066002	165	0	0			0
Soil_refseq	1954	Streptomyces_brasiliensis	10696112	1532	47	0.0306789	94.2218	15.4255	0.0395097
Soil_refseq	1956	Streptomyces_diastaticus	6982337	493	261	0.529412	99.3675	40.5096	0.40147
Soil_refseq	1960	Streptomyces_vinaceus	7673509	614	4	0.00651466	93.8521	19.25	0.00272366
Soil_refseq	1961	Streptomyces_virginiae	8588732	459	2	0.0043573	92.6471	3	0.000803378
Soil_refseq	1963	Streptomyces_olivochromogenes	11669312	1955	15	0.00767263	94.685	21.4	0.0138483
Soil_refseq	1967	Streptomyces_kanamyceticus	10133897	1384	10	0.00722543	93.6239	8.9	0.00945342
Soil_refseq	1968	Streptomyces_cellulosae	10063079	1114	59	0.0529623	94.0619	16.678	0.0601804
Soil_refseq	1969	Streptomyces_chartreusis	9912098	866	7	0.00808314	95.1428	22	0.00997771
Soil_refseq	1970	Streptomyces_morookaense	7418596	212	1	0.00471698	93.3775	8	0.00204891
Soil_refseq	1971	Streptomyces_noursei	9857535	563	1	0.0017762	95.614	24	0.00116662
Soil_refseq	1990	Actinomadura_atramentaria	6710579	2489	90	0.0361591	93.7071	14.8222	0.123924
Soil_refseq	1992	Thermomonospora_echinospora	8649739	2785	90	0.032316	94.3604	18.6333	0.0869622
Soil_refseq	1993	Actinomadura_madurae	10255144	7375	1039	0.140881	94.3394	18.0818	1.01256
Soil_refseq	1997	Microtetraspora_fusca	9024887	1488	19	0.0127688	95.1971	25.1053	0.0184379
Soil_refseq	1999	Planomonospora_venezuelensis	8185542	1711	18	0.0105202	93.4211	12.3333	0.0162482
Soil_refseq	2001	Streptosporangium_roseum	10369518	1711	29	0.0169492	93.1375	10.4483	0.0266068
Soil_refseq	2002	Streptosporangium_amethystogenes	10087134	1959	23	0.0117407	94.9088	21.7391	0.0198173
Soil_refseq	2006	Thermobispora_bispora	4189976	1935	73	0.0377261	96.2995	19.0685	0.103437
Soil_refseq	2014	Nocardiopsis_dassonvillei	6541269	2556	188	0.0735524	95.0058	21.3351	0.299544
Soil_refseq	2015	Nocardiopsis_prasina	5998803	369	32	0.0867209	96.2589	28.1562	0.0441588
Soil_refseq	2017	Streptoalloteichus_hindustanus	7279383	2198	38	0.0172884	94.3448	18.3947	0.0445367
Soil_refseq	2020	Thermomonospora_curvata	5639016	2064	66	0.0319767	97.617	32.4394	0.0917004
Soil_refseq	2021	Thermobifida_fusca	3642249	21442	14116	0.658334	99.5094	40.5136	31.8206
Soil_refseq	2024	Thermoactinomyces_intermedius	2756565	4	0	0			0
Soil_refseq	2026	Thermoactinomyces_vulgaris	2638027	10	0	0			0
Soil_refseq	2030	Kibdelosporangium_aridum	12276125	10579	2164	0.204556	94.4952	19.5924	1.77072
Soil_refseq	2033	Microbacterium_testaceum	3590404	5419	7	0.00129175	93.1302	10.1429	0.0264594
Soil_refseq	2035	Curtobacterium_flaccumfaciens	3745652	2997	44	0.0146813	95.3091	24.5227	0.12054
Soil_refseq	2036	Curtobacterium_citreum	3612036	133	0	0			0
Soil_refseq	2039	Tropheryma_whipplei	925938	32	0	0			0
Soil_refseq	2041	Aeromicrobium_erythreum	3629239	1073	31	0.028891	93.4031	12.7097	0.0726323
Soil_refseq	2045	Pimelobacter_simplex	5637360	4589	64	0.0139464	93.9322	15.7656	0.105989
Soil_refseq	2047	Rothia_dentocariosa	2506025	90	4	0.0444444	93.8521	15.5	0.0105745
Soil_refseq	2051	Mobiluncus_curtisii	2146480	78	0	0			0
Soil_refseq	2052	Mobiluncus_mulieris	2481783	154	0	0			0
Soil_refseq	2054	Gordonia_bronchialis	5290012	1073	27	0.0251631	98.7428	38.4074	0.0507749
Soil_refseq	2055	Gordonia_terrae	5701501	565	12	0.0212389	96.5684	24.9167	0.0182759
Soil_refseq	2057	Sphaerobacter_thermophilus	3993764	4854	328	0.0675731	97.5221	30.3994	0.727935
Soil_refseq	2061	Tsukamurella_paurometabola	4479724	1903	54	0.0283762	94.6213	19.9259	0.13099
Soil_refseq	2064	Kitasatospora_griseola	8578408	938	0	0			0
Soil_refseq	2065	Kitasatospora_phosalacinea	7620895	2391	4	0.00167294	92.8587	9.25	0.00597043
Soil_refseq	2066	Kitasatospora_setae	8783278	1	0	0			0
Soil_refseq	2072	Saccharothrix_australiensis	7861373	2442	75	0.0307125	94.3359	17.6267	0.0842474
Soil_refseq	2074	Pseudonocardia_autotrophica	7535285	3683	20	0.00543036	97.6854	6.15	0.0275902
Soil_refseq	2078	Sporolactobacillus_inulinus	3139478	21	0	0			0
Soil_refseq	2088	Anaeroplasma_bactoclasticum	2199979	16	0	0			0
Soil_refseq	2094	Mycoplasmopsis_arginini	678592	4	0	0			0
Soil_refseq	2095	Mycoplasma_capricolum	1010023	5	0	0			0
Soil_refseq	2096	Mycoplasma_gallisepticum	981408	4	0	0			0
Soil_refseq	2097	Mycoplasma_genitalium	580076	2	0	0			0
Soil_refseq	2098	Metamycoplasma_hominis	715165	7	0	0			0
Soil_refseq	2099	Mesomycoplasma_hyopneumoniae	897405	4	0	0			0
Soil_refseq	2100	Mesomycoplasma_hyorhinis	838863	46	0	0			0
Soil_refseq	2102	Mycoplasma_mycoides	1035494	6	0	0			0
Soil_refseq	2104	Mycoplasma_pneumoniae	823017	4	0	0			0
Soil_refseq	2105	Mycoplasma_leachii	1008951	2	0	0			0
Soil_refseq	2107	Mycoplasmopsis_pulmonis	962791	1	0	0			0
Soil_refseq	2109	Mycoplasmopsis_synoviae	846495	4	0	0			0
Soil_refseq	2110	Mycoplasmopsis_agalactiae	877438	16	0	0			0
Soil_refseq	2111	Metamycoplasma_arthritidis	806209	4	0	0			0
Soil_refseq	2112	Mycoplasmopsis_bovigenitalium	841512	8	0	0			0
Soil_refseq	2113	Mycoplasmopsis_californica	793841	1	0	0			0
Soil_refseq	2115	Mycoplasmopsis_fermentans	1118751	4	0	0			0
Soil_refseq	2116	Malacoplasma_iowae	1278574	2	0	0			0
Soil_refseq	2118	Mesomycoplasma_mobile	777079	5	0	0			0
Soil_refseq	2120	Mesomycoplasma_neurolyticum	1040908	3	0	0			0
Soil_refseq	2121	Metamycoplasma_orale	806218	1	0	0			0
Soil_refseq	2122	Mycoplasma_pirum	839829	3	0	0			0
Soil_refseq	2123	Mycoplasma_putrefaciens	832598	4	0	0			0
Soil_refseq	2124	Metamycoplasma_salivarium	728347	8	0	0			0
Soil_refseq	2127	Mesomycoplasma_collis	902877	10	0	0			0
Soil_refseq	2128	Mesomycoplasma_flocculare	778866	2	0	0			0
Soil_refseq	2130	Ureaplasma_urealyticum	881828	4	0	0			0
Soil_refseq	2133	Spiroplasma_citri	1640878	3	0	0			0
Soil_refseq	2136	Spiroplasma_monobiae	891575	3	0	0			0
Soil_refseq	2137	Spiroplasma_apis	1160554	10	0	0			0
Soil_refseq	2138	Spiroplasma_poulsonii	1966068	1	0	0			0
Soil_refseq	2139	Spiroplasma_clarkii	1560007	12	0	0			0
Soil_refseq	2143	Spiroplasma_gladiatoris	1164642	5	0	0			0
Soil_refseq	2145	Spiroplasma_taiwanense	1086278	7	0	0			0
Soil_refseq	2148	Acholeplasma_laidlawii	1496992	10	0	0			0
Soil_refseq	2149	Mesoplasma_entomophilum	847967	7	0	0			0
Soil_refseq	2150	Haploplasma_modicum	1219180	12	0	0			0
Soil_refseq	2151	Mesoplasma_florum	793224	6	0	0			0
Soil_refseq	2161	Methanobacterium_bryantii	3466370	4	2	0.5	95.7983	24	0.00346183
Soil_refseq	2162	Methanobacterium_formicicum	2494510	34	7	0.205882	98.7763	36.4286	0.0280616
Soil_refseq	2173	Methanobrevibacter_smithii	1853160	32	21	0.65625	97.0062	31.0952	0.0712836
Soil_refseq	2176	Methanohalophilus_mahii	2012424	5	0	0			0
Soil_refseq	2177	Methanohalophilus_halophilus	2022959	3	0	0			0
Soil_refseq	2186	Methanothermococcus_thermolithotrophicus	1706496	9	0	0			0
Soil_refseq	2187	Methanococcus_vannielii	1720048	14	0	0			0
Soil_refseq	2188	Methanococcus_voltae	1780593	13	0	0			0
Soil_refseq	2189	Methanotorris_igneus	1854197	4	0	0			0
Soil_refseq	2190	Methanocaldococcus_jannaschii	1739927	1	0	0			0
Soil_refseq	2197	Methanogenium_cariaci	2686643	13	0	0			0
Soil_refseq	2198	Methanoculleus_marisnigri	2478101	58	6	0.103448	96.8752	30	0.0203382
Soil_refseq	2200	Methanoculleus_thermophilus	2223235	125	38	0.304	99.8532	42	0.0949067
Soil_refseq	2201	Methanofollis_liminatans	2475100	79	0	0			0
Soil_refseq	2203	Methanospirillum_hungatei	3544738	10	0	0			0
Soil_refseq	2205	Methanomicrobium_mobile	1711791	20	0	0			0
Soil_refseq	2208	Methanosarcina_barkeri	4574907	21	0	0			0
Soil_refseq	2209	Methanosarcina_mazei	4142816	53	4	0.0754717	100	42	0.00598627
Soil_refseq	2210	Methanosarcina_thermophila	3127379	27	18	0.666667	100	42	0.0406411
Soil_refseq	2214	Methanosarcina_acetivorans	5751492	18	0	0			0
Soil_refseq	2221	Methanolobus_tindarius	3151883	7	0	0			0
Soil_refseq	2223	Methanothrix_soehngenii	3026645	62	37	0.596774	98.9062	37.9459	0.0719609
Soil_refseq	2224	Methanothrix_thermoacetophila	1879471	26	1	0.0384615	95.2381	24	0.00340521
Soil_refseq	2226	Methanococcoides_methylutens	2508511	12	0	0			0
Soil_refseq	2234	Archaeoglobus_fulgidus	2178400	14	0	0			0
Soil_refseq	2238	Haloarcula_marismortui	4274642	5	0	0			0
Soil_refseq	2242	Halobacterium_salinarum	2429680	32	1	0.03125	100	42	0.00625597
Soil_refseq	2246	Haloferax_volcanii	4012900	30	0	0			0
Soil_refseq	2247	Halorubrum_lacusprofundi	3692576	157	0	0			0
Soil_refseq	2248	Halorubrum_saccharovorum	3423703	221	0	0			0
Soil_refseq	2250	Halococcus_morrhuae	2991556	93	7	0.0752688	93.4816	17.4286	0.0273771
Soil_refseq	2252	Haloferax_mediterranei	3907473	90	0	0			0
Soil_refseq	2257	Natronomonas_pharaonis	2749696	132	0	0			0
Soil_refseq	2261	Pyrococcus_furiosus	1889914	7	0	0			0
Soil_refseq	2264	Thermococcus_celer	1866819	45	0	0			0
Soil_refseq	2265	Thermococcus_litoralis	2215172	8	0	0			0
Soil_refseq	2269	Thermofilum_pendens	1813393	33	0	0			0
Soil_refseq	2271	Thermoproteus_tenax	1841542	21	0	0			0
Soil_refseq	2275	Desulfurococcus_mucosus	1314639	3	0	0			0
Soil_refseq	2277	Pyrobaculum_islandicum	1826402	14	0	0			0
Soil_refseq	2280	Staphylothermus_marinus	1570485	3	0	0			0
Soil_refseq	2283	Acidianus_ambivalens	2252027	2	0	0			0
Soil_refseq	2285	Sulfolobus_acidocaldarius	2225959	18	0	0			0
Soil_refseq	2286	Saccharolobus_shibatae	2916875	4	0	0			0
Soil_refseq	2287	Saccharolobus_solfataricus	2658139	8	0	0			0
Soil_refseq	2290	Desulfobacter_curvatus	5644283	115	0	0			0
Soil_refseq	2291	Desulfobacter_hydrogenophilus	5157696	70	0	0			0
Soil_refseq	2292	Desulfobacter_latus	4317866	41	2	0.0487805	94.1176	23	0.00238544
Soil_refseq	2293	Desulfobacter_postgatei	3974658	55	0	0			0
Soil_refseq	2296	Desulforapulum_autotrophicum	5657782	96	0	0			0
Soil_refseq	2298	Desulfocicer_vacuolatum	5035799	64	0	0			0
Soil_refseq	2303	Thermoplasma_acidophilum	1564906	9	0	0			0
Soil_refseq	2309	Pyrodictium_occultum	1621727	80	0	0			0
Soil_refseq	2315	Methanoplanus_limicola	3200946	7	0	0			0
Soil_refseq	2317	Methanosphaera_stadtmanae	1767403	11	5	0.454545	99.7368	9.2	0.0183886
Soil_refseq	2320	Methanopyrus_kandleri	1694969	44	0	0			0
Soil_refseq	2322	Methanohalobium_evestigatum	2406232	12	0	0			0
Soil_refseq	2325	Thermoanaerobacter_kivui	2397824	8	0	0			0
Soil_refseq	2331	Halanaerobium_praevalens	2309262	36	0	0			0
Soil_refseq	2336	Thermotoga_maritima	1869644	3	0	0			0
Soil_refseq	2340	Solemya_velum_gill_symbiont	2629178	149	4	0.0268456	94.8519	24	0.0136164
Soil_refseq	2350	Haliscomenobacter_hydrossis	8771651	371	5	0.0134771	93.7519	19	0.0062702
Soil_refseq	2352	Flexistipes_sinusarabici	2526590	41	3	0.0731707	96.3671	1.66667	0.00478906
Soil_refseq	2355	unidentified_bacterial_endosymbiont	1661850	45	1	0.0222222	94.8276	24	0.00355026
Soil_refseq	2358	Desulfomonile_tiedjei	6527027	158	20	0.126582	93.5385	14.6	0.0217251
Soil_refseq	2360	Bathymodiolus_thermophilus_thioautotrophic_gill_symbiont	2832685	28	0	0			0
Soil_refseq	2369	Arhodomonas_aquaeolei	3957769	640	46	0.071875	96.1045	30.8913	0.0951041
Soil_refseq	2371	Xylella_fastidiosa	2600197	211	0	0			0
Soil_refseq	2374	Acetonema_longum	4323011	94	0	0			0
Soil_refseq	2377	Sporomusa_termitida	5316008	86	0	0			0
Soil_refseq	2378	Sporomusa_ovata	5433971	27	0	0			0
Soil_refseq	2382	Acetitomaculum_ruminis	3082721	16	0	0			0
Soil_refseq	2421	Thermosipho_africanus	2016657	10	0	0			0
Soil_refseq	2423	Fervidobacterium_islandicum	2237453	3	0	0			0
Soil_refseq	2424	Fervidobacterium_nodosum	1948941	1	0	0			0
Soil_refseq	2426	Teredinibacter_turnerae	5348823	1615	76	0.0470588	95.1134	16.4605	0.117615
Soil_refseq	2434	Roseobacter_denitrificans	4308791	210	0	0			0
Soil_refseq	2698	Heliobacterium_chlorum	4147899	34	0	0			0
Soil_refseq	2699	Heliomicrobium_gestii	3685747	212	0	0			0
Soil_refseq	2702	Gardnerella_vaginalis	1667406	80	0	0			0
Soil_refseq	2718	Cardiobacterium_hominis	2670755	305	0	0			0
Soil_refseq	2724	Hirschia_baltica	3540114	39	0	0			0
Soil_refseq	2734	Symbiobacterium_thermophilum	3566135	1077	57	0.0529248	98.2332	31.4561	0.133478
Soil_refseq	2736	Verrucomicrobium_spinosum	8220857	677	1	0.0014771	92.7152	8	0.00184896
Soil_refseq	2738	Vagococcus_fluvialis	2651514	59	6	0.101695	96.0691	25.6667	0.0190457
Soil_refseq	2739	Vagococcus_salmoninarum	3104446	8	0	0			0
Soil_refseq	2741	Peptococcus_niger	1968473	38	0	0			0
Soil_refseq	2743	Marinobacter_nauticus	3989480	1154	52	0.0450607	95.3864	23.9038	0.153479
Soil_refseq	2746	Halomonas_elongata	4061825	1058	47	0.0444234	95.4288	23.9362	0.106947
Soil_refseq	2748	Carnobacterium_divergens	2629627	30	0	0			0
Soil_refseq	2749	Carnobacterium_gallinarum	4041428	12	0	0			0
Soil_refseq	2750	Carnobacterium_mobile	2632867	87	47	0.54023	98.8311	40.0213	0.159636
Soil_refseq	2751	Carnobacterium_maltaromaticum	3502975	61	0	0			0
Soil_refseq	2752	Carnobacterium_funditum	2352439	22	0	0			0
Soil_refseq	2754	Synergistes_jonesii	2741240	168	0	0			0
Soil_refseq	2756	Brochothrix_thermosphacta	2578375	12	0	0			0
Soil_refseq	2757	Brochothrix_campestris	2324176	6	0	0			0
Soil_refseq	12915	Acidianus_infernus	2222414	3	0	0			0
Soil_refseq	12917	Acidovorax_facilis	6424669	113	4	0.0353982	96.9163	32.5	0.00367334
Soil_refseq	13076	Globicatella_sanguinis	2622382	33	10	0.30303	97.3963	36.4	0.0330615
Soil_refseq	13160	Brevundimonas_bullata	3484100	1398	205	0.146638	95.135	22.5073	0.589765
Soil_refseq	13243	Rarobacter_faecitabidus	2804931	727	13	0.0178817	95.0615	23.9231	0.027309
Soil_refseq	13264	Brachyspira_innocens	3281611	3	0	0			0
Soil_refseq	13276	Suttonella_indologenes	2507163	107	1	0.00934579	94.702	23	0.00606263
Soil_refseq	13335	Anaerobiospirillum_succiniciproducens	3804739	28	0	0			0
Soil_refseq	13373	Burkholderia_mallei	5834748	33	0	0			0
Soil_refseq	13656	Rhizorhapis_suberifaciens	3360228	339	3	0.00884956	92.1454	3	0.00711261
Soil_refseq	13688	Novosphingobium_capsulatum	4836455	109	1	0.00917431	93.3333	8	0.00312212
Soil_refseq	13689	Sphingomonas_paucimobilis	4367078	178	0	0			0
Soil_refseq	13690	Sphingobium_yanoikuyae	5532633	1305	4	0.00306513	98.0423	42	0.00272926
Soil_refseq	13725	Thiocystis_violacea	5368928	1522	3	0.00197109	92.7356	6.33333	0.00445154
Soil_refseq	13769	Natrialba_magadii	4443643	111	2	0.018018	96.0155	32	0.00384819
Soil_refseq	13773	Pyrobaculum_aerophilum	2222430	35	0	0			0
Soil_refseq	28025	Bifidobacterium_animalis	1938483	476	4	0.00840336	98.4127	41	0.00717056
Soil_refseq	28026	Bifidobacterium_pseudocatenulatum	2313752	182	0	0			0
Soil_refseq	28028	Corynebacterium_flavescens	2758653	138	15	0.108696	99.4693	40.8	0.0599568
Soil_refseq	28031	Lysinibacillus_fusiformis	4843789	65	0	0			0
Soil_refseq	28034	Sulfobacillus_thermosulfidooxidans	3861015	85	1	0.0117647	94	23	0.0013209
Soil_refseq	28035	Staphylococcus_lugdunensis	2571829	6	0	0			0
Soil_refseq	28037	Streptococcus_mitis	1906344	58	1	0.0172414	94.0397	23	0.00797338
Soil_refseq	28038	Latilactobacillus_curvatus	1916521	22	0	0			0
Soil_refseq	28042	Saccharopolyspora_rectivirgula	3961468	1846	610	0.330444	99.6002	41.0328	1.58764
Soil_refseq	28044	Streptomyces_longisporoflavus	9802249	1479	32	0.0216362	94.511	18.6875	0.0286363
Soil_refseq	28045	Mycobacterium_celatum	4720680	642	15	0.0233645	94.146	18.1333	0.0324318
Soil_refseq	28047	Mycolicibacterium_confluentis	5876557	1065	11	0.0103286	92.9166	9.63636	0.0169827
Soil_refseq	28049	Acidothermus_cellulolyticus	2443540	800	28	0.035	96.7004	30.0357	0.0512371
Soil_refseq	28051	Lachnospira_multipara	2871860	9	0	0			0
Soil_refseq	28052	Lachnospira_pectinoschiza	2704308	16	0	0			0
Soil_refseq	28064	Heliobacterium_mobile	4116862	47	0	0			0
Soil_refseq	28066	Rhodoferax_fermentans	4467741	140	2	0.0142857	92.8571	8	0.00127581
Soil_refseq	28068	Rubrivivax_gelatinosus	5075359	3398	19	0.00559152	93.0984	11.3684	0.0381845
Soil_refseq	28072	Nostoc_sp._PCC_7524	6718869	32	0	0			0
Soil_refseq	28077	Nitrospirillum_amazonense	6874351	3574	9	0.00251819	92.7424	8.11111	0.00738979
Soil_refseq	28080	Campylobacter_upsaliensis	1628950	87	0	0			0
Soil_refseq	28082	Legionella_anisa	4362280	19	0	0			0
Soil_refseq	28083	Legionella_birminghamensis	3789238	43	8	0.186047	99	42	0.0211916
Soil_refseq	28084	Legionella_cherrii	3696762	16	0	0			0
Soil_refseq	28085	Legionella_cincinnatiensis	4098995	23	0	0			0
Soil_refseq	28087	Legionella_sainthelensi	4597280	51	0	0			0
Soil_refseq	28088	Legionella_wadsworthii	3602617	37	0	0			0
Soil_refseq	28090	Acinetobacter_lwoffii	3528101	69	5	0.0724638	94.8212	19.6	0.0176866
Soil_refseq	28091	Neisseria_weaveri	2238481	56	2	0.0357143	96.5116	1	0.00777313
Soil_refseq	28092	Robbsia_andropogonis	6828120	323	0	0			0
Soil_refseq	28094	Trinickia_caryophylli	6589281	741	0	0			0
Soil_refseq	28095	Burkholderia_gladioli	8201484	2851	1	0.000350754	92	3	0.00184113
Soil_refseq	28097	Ralstonia_syzygii	5521407	133	0	0			0
Soil_refseq	28099	Agrobacterium_rubi	5293384	513	2	0.00389864	91.9355	3	0.00119016
Soil_refseq	28101	Phyllobacterium_myrsinacearum	5424106	1019	1	0.000981354	93.3333	8	0.00278387
Soil_refseq	28104	Mesorhizobium_huakuii	7212699	374	6	0.0160428	92.9289	9.66667	0.00666879
Soil_refseq	28107	Pseudoalteromonas_espejiana	4500451	21	0	0			0
Soil_refseq	28108	Alteromonas_macleodii	4867393	85	0	0			0
Soil_refseq	28109	Pseudoalteromonas_nigrifaciens	4274777	12	0	0			0
Soil_refseq	28110	Francisella_philomiragia	2017543	23	0	0			0
Soil_refseq	28111	Bacteroides_eggerthii	4206509	44	0	0			0
Soil_refseq	28112	Tannerella_forsythia	3405521	247	0	0			0
Soil_refseq	28113	Bacteroides_heparinolyticus	3608975	95	0	0			0
Soil_refseq	28114	Porphyromonas_levii	2261978	57	0	0			0
Soil_refseq	28115	Porphyromonas_macacae	2214526	71	0	0			0
Soil_refseq	28116	Bacteroides_ovatus	6472489	80	3	0.0375	97.5451	35.6667	0.00570105
Soil_refseq	28117	Alistipes_putredinis	2550678	139	10	0.0719424	100	42	0.0329324
Soil_refseq	28118	Odoribacter_splanchnicus	4392177	155	2	0.0129032	99.5238	42	0.00382498
Soil_refseq	28119	Bacteroides_zoogleoformans	3361794	65	0	0			0
Soil_refseq	28122	Fibrobacter_intestinalis	3292368	3	0	0			0
Soil_refseq	28123	Porphyromonas_asaccharolytica	2186370	72	0	0			0
Soil_refseq	28124	Porphyromonas_endodontalis	2102930	29	0	0			0
Soil_refseq	28125	Prevotella_bivia	2521238	20	0	0			0
Soil_refseq	28126	Prevotella_buccae	3284105	29	0	0			0
Soil_refseq	28127	Prevotella_buccalis	3307707	70	0	0			0
Soil_refseq	28128	Prevotella_corporis	2800206	32	0	0			0
Soil_refseq	28129	Prevotella_denticola	3106544	86	0	0			0
Soil_refseq	28130	Prevotella_disiens	3051352	56	0	0			0
Soil_refseq	28131	Prevotella_intermedia	2674170	99	0	0			0
Soil_refseq	28132	Prevotella_melaninogenica	3168282	111	3	0.027027	94.7018	28.6667	0.0128776
Soil_refseq	28133	Prevotella_nigrescens	2887107	30	0	0			0
Soil_refseq	28134	Prevotella_oralis	2839537	22	0	0			0
Soil_refseq	28135	Prevotella_oris	3168212	19	0	0			0
Soil_refseq	28136	Prevotella_oulorum	2805893	48	0	0			0
Soil_refseq	28137	Prevotella_veroralis	2990547	32	0	0			0
Soil_refseq	28139	Rikenella_microfusus	2880076	149	0	0			0
Soil_refseq	28141	Cronobacter_sakazakii	4437993	771	0	0			0
Soil_refseq	28151	Serratia_proteamaculans	5525200	224	0	0			0
Soil_refseq	28152	Yersinia_kristensenii	4733508	62	0	0			0
Soil_refseq	28156	Spirabiliibacterium_mucosae	2151200	64	0	0			0
Soil_refseq	28159	Caviibacterium_pharyngocola	2486286	33	0	0			0
Soil_refseq	28161	Conservatibacter_flavescens	2607477	30	0	0			0
Soil_refseq	28169	Vibrio_pelagius	4963975	28	0	0			0
Soil_refseq	28171	Vibrio_aestuarianus	4144461	48	0	0			0
Soil_refseq	28172	Vibrio_metschnikovii	3831334	42	0	0			0
Soil_refseq	28173	Vibrio_nigripulchritudo	6389377	136	0	0			0
Soil_refseq	28175	Vibrio_orientalis	4698244	21	0	0			0
Soil_refseq	28176	Candidatus_Photodesmus_katoptron	1000156	3	0	0			0
Soil_refseq	28181	Magnetovibrio_blakemorei	3638804	208	1	0.00480769	96.6443	40	0.00412223
Soil_refseq	28182	Leptospira_noguchii	4710917	60	0	0			0
Soil_refseq	28183	Leptospira_santarosai	3983611	36	0	0			0
Soil_refseq	28184	Leptospira_weilii	4381393	29	0	0			0
Soil_refseq	28187	Acetohalobium_arabaticum	2469596	21	0	0			0
Soil_refseq	28188	Capnocytophaga_canimorsus	2414275	325	0	0			0
Soil_refseq	28189	Capnocytophaga_cynodegmi	2640475	205	0	0			0
Soil_refseq	28195	Thermonema_lapsum	2693118	191	0	0			0
Soil_refseq	28197	Aliarcobacter_butzleri	2341251	104	0	0			0
Soil_refseq	28198	Aliarcobacter_cryaerophilus	2108340	104	1	0.00961538	92.7152	8	0.00720946
Soil_refseq	28199	Arcobacter_nitrofigilis	3192235	5	0	0			0
Soil_refseq	28200	Aliarcobacter_skirrowii	1969846	15	0	0			0
Soil_refseq	28210	Chelatococcus_asaccharovorans	7299678	1424	100	0.0702247	97.1657	30.61	0.121348
Soil_refseq	28212	Sphingomonas_adhaesiva	3760237	522	6	0.0114943	93.1615	11.3333	0.00877604
Soil_refseq	28213	Sphingomonas_parapaucimobilis	3994522	138	0	0			0
Soil_refseq	28214	Sphingomonas_sp.	3841663	1	0	0			0
Soil_refseq	28220	Brachymonas_denitrificans	2712870	515	8	0.015534	94.1384	15.875	0.0242548
Soil_refseq	28223	Desulfobacula_toluolica	5197905	26	0	0			0
Soil_refseq	28224	Mesoplasma_seiffertii	977957	3	0	0			0
Soil_refseq	28227	Malacoplasma_penetrans	1358633	5	0	0			0
Soil_refseq	28229	Colwellia_psychrerythraea	5373180	71	0	0			0
Soil_refseq	28230	Carnobacterium_alterfunditum	2548842	3	0	0			0
Soil_refseq	28232	Geobacter_metallireducens	4011182	114	1	0.00877193	92.7273	3	0.0013961
Soil_refseq	28234	Geotoga_petraea	2150220	14	0	0			0
Soil_refseq	28237	Petrotoga_miotherma	2107090	1	0	0			0
Soil_refseq	28251	Ornithobacterium_rhinotracheale	2399175	267	0	0			0
Soil_refseq	28252	Halomonas_halodenitrificans	3464094	989	88	0.0889788	94.4877	18.1705	0.211715
Soil_refseq	28254	Marinomonas_communis	3854463	47	0	0			0
Soil_refseq	28258	Cobetia_marina	4176400	121	1	0.00826446	89.5522	3	0.0016282
Soil_refseq	28264	Arcanobacterium_haemolyticum	1988850	73	1	0.0136986	98.0132	1	0.00764261
Soil_refseq	28320	Mycoplana_dimorpha	4592697	922	24	0.0260304	94.9325	22.9167	0.0499924
Soil_refseq	28442	Haloarcula_vallismortis	3896637	90	0	0			0
Soil_refseq	28444	Herbidospora_cretacea	8282092	2771	9	0.00324792	94.2631	18.8889	0.0109393
Soil_refseq	28445	Mycobacterium_intermedium	6885661	660	8	0.0121212	94.0569	18.5	0.0131578
Soil_refseq	28446	Anaerotignum_propionicum	3120417	29	0	0			0
Soil_refseq	28447	Clavibacter_michiganensis	3377556	9132	23	0.00251862	93.3411	6.04348	0.0509244
Soil_refseq	28448	Komagataeibacter_xylinus	3727795	396	0	0			0
Soil_refseq	28449	Neisseria_subflava	2195659	9	0	0			0
Soil_refseq	28450	Burkholderia_pseudomallei	7081111	1920	3	0.0015625	91.2822	9.33333	0.00333281
Soil_refseq	28452	Leptospira_alstonii	4436408	28	0	0			0
Soil_refseq	28454	Sphingobacterium_multivorum	5965850	110	7	0.0636364	95.5697	27.2857	0.0112138
Soil_refseq	28885	Hydrogenovibrio_marinus	2491293	39	0	0			0
Soil_refseq	28887	Planobispora_longispora	8845392	1687	25	0.0148192	93.3076	12.76	0.0246795
Soil_refseq	28893	Streptomyces_pilosus	7585172	1115	112	0.100448	95.1588	23.6518	0.155171
Soil_refseq	28894	Streptomyces_nitrosporeus	7581562	1138	9	0.00790861	92.9405	9.11111	0.0125172
Soil_refseq	28896	Thermoanaerobacterium_saccharolyticum	2837411	9	0	0			0
Soil_refseq	28898	Campylobacter_helveticus	1871495	9	0	0			0
Soil_refseq	28901	Salmonella_enterica	4951383	2233	1	0.000447828	97.7273	1	0.00179748
Soil_refseq	28903	Mycoplasmopsis_bovis	1003404	9	0	0			0
Soil_refseq	28907	Caedibacter_taeniospiralis	1323505	39	1	0.025641	92.053	3	0.0114847
Soil_refseq	29282	Haloarcula_japonica	4279145	89	0	0			0
Soil_refseq	29283	Halorubrum_distributum	3306135	11	0	0			0
Soil_refseq	29284	Halorubrum_trapanicum	3080988	286	0	0			0
Soil_refseq	29288	Natronococcus_occultus	4314118	330	13	0.0393939	94.4438	20	0.0343755
Soil_refseq	29291	Methanococcoides_burtonii	2575032	13	0	0			0
Soil_refseq	29292	Pyrococcus_abyssi	1768562	3	0	0			0
Soil_refseq	29299	Nocardioides_plantarum	4681321	3334	181	0.0542891	93.8905	15.7072	0.385062
Soil_refseq	29303	Streptomyces_cattleya	8092553	531	6	0.0112994	93.0561	10	0.00367004
Soil_refseq	29305	Streptomyces_griseoincarnatus	7707382	94	23	0.244681	95.3032	24.6087	0.0317488
Soil_refseq	29306	Streptomyces_griseoluteus	6664735	333	8	0.024024	94.8869	24.625	0.0117634
Soil_refseq	29311	Mycobacterium_haemophilum	4235765	457	1	0.00218818	95.3642	24	0.00358849
Soil_refseq	29313	Mycobacterium_shimoidei	4842631	851	24	0.0282021	95.5164	10.0417	0.0381404
Soil_refseq	29314	Mycolicibacter_hiberniae	4396654	543	15	0.0276243	94.3774	18.8667	0.0343443
Soil_refseq	29316	Schaalia_hyovaginalis	2346665	943	7	0.00742312	94.6563	21.4286	0.0148296
Soil_refseq	29320	Paenarthrobacter_nicotinovorans	4481325	583	4	0.00686106	92.9899	12	0.0112467
Soil_refseq	29321	Corynebacterium_otitidis	2118285	947	6	0.0063358	92.3044	6.33333	0.0206299
Soil_refseq	29322	#NAME?	3331935	54	0	0			0
Soil_refseq	29324	Caldicellulosiruptor_naganoensis	2494610	12	0	0			0
Soil_refseq	29329	Thermoanaerobacterium_xylanolyticum	2534358	7	0	0			0
Soil_refseq	29332	Domibacillus_aminovorans	3731130	66	3	0.0454545	96.6923	29	0.00686119
Soil_refseq	29341	Clostridium_argentinense	4803058	14	0	0			0
Soil_refseq	29344	Caloramator_fervidus	1763241	9	0	0			0
Soil_refseq	29345	Sedimentibacter_hydroxybenzoicus	3809287	32	0	0			0
Soil_refseq	29347	#NAME?	3658040	41	0	0			0
Soil_refseq	29348	#NAME?	2528470	18	0	0			0
Soil_refseq	29354	Lacrimispora_celerecrescens	5272838	42	0	0			0
Soil_refseq	29355	Ruminiclostridium_cellobioparum	6132222	44	0	0			0
Soil_refseq	29357	Clostridium_collagenovorans	3482404	15	0	0			0
Soil_refseq	29358	Paeniclostridium_ghonii	3657532	14	0	0			0
Soil_refseq	29359	Asaccharospora_irregularis	2622699	13	0	0			0
Soil_refseq	29360	Cellulosilyticum_lentocellum	4714237	14	0	0			0
Soil_refseq	29362	Ruminiclostridium_papyrosolvens	5027861	49	0	0			0
Soil_refseq	29363	Clostridium_paraputrificum	3561289	36	2	0.0555556	97.351	33	0.00755344
Soil_refseq	29364	#NAME?	3458343	17	0	0			0
Soil_refseq	29365	Hathewaya_proteolytica	2818024	14	0	0			0
Soil_refseq	29367	Clostridium_puniceum	6082167	28	0	0			0
Soil_refseq	29369	Clostridium_sardiniense	3942322	34	3	0.0882353	95.3317	24.3333	0.0114907
Soil_refseq	29370	Lacrimispora_sphenoides	5309474	48	0	0			0
Soil_refseq	29372	Clostridium_thermobutyricum	3505620	35	0	0			0
Soil_refseq	29373	Clostridium_thermopalmarium	2819317	3	0	0			0
Soil_refseq	29376	Desulfofundulus_thermobenzoicus	3716015	189	0	0			0
Soil_refseq	29378	Staphylococcus_arlettae	2706864	7	0	0			0
Soil_refseq	29379	Staphylococcus_auricularis	2216575	21	0	0			0
Soil_refseq	29380	Staphylococcus_caprae	2598513	35	0	0			0
Soil_refseq	29382	Staphylococcus_cohnii	2694244	30	0	0			0
Soil_refseq	29384	Staphylococcus_kloosii	2639038	21	0	0			0
Soil_refseq	29385	Staphylococcus_saprophyticus	2577899	22	0	0			0
Soil_refseq	29388	Staphylococcus_capitis	2497742	17	0	0			0
Soil_refseq	29389	Streptococcus_alactolyticus	1832198	3	2	0.666667	100	1	0.0164829
Soil_refseq	29391	Gemella_morbillorum	1760930	5	0	0			0
Soil_refseq	29394	Dolosigranulum_pigrum	1862135	47	2	0.0425532	98.0132	1	0.0163253
Soil_refseq	29396	Saccharococcus_thermophilus	3145141	39	1	0.025641	100	6	0.00346566
Soil_refseq	29405	Microlunatus_phosphovorus	5683123	2219	113	0.0509238	94.7084	19.3805	0.165437
Soil_refseq	29408	Rhodoplanes_elegans	6538588	2441	57	0.0233511	93.3103	12.7018	0.0690057
Soil_refseq	29409	Rhodoplanes_roseus	6879536	2606	48	0.018419	94.1953	17.7292	0.0590883
Soil_refseq	29419	Helicobacter_canis	1930063	37	0	0			0
Soil_refseq	29421	Nitrobacter_vulgaris	4293395	1837	1115	0.606968	96.0779	28.6673	2.65268
Soil_refseq	29422	Legionella_brunensis	3750738	32	2	0.0625	94.702	16	0.00618545
Soil_refseq	29423	Legionella_oakridgensis	2668211	77	10	0.12987	94.4247	18	0.0227868
Soil_refseq	29427	Methylorubrum_rhodesianum	5873985	147	1	0.00680272	94.0397	23	0.00258768
Soil_refseq	29428	Methylorubrum_rhodinum	5406054	888	8	0.00900901	94.4027	17.5	0.0091564
Soil_refseq	29429	Methylorubrum_zatmanii	5389031	659	3	0.00455235	94.4762	16	0.0082204
Soil_refseq	29430	Acinetobacter_haemolyticus	3441166	53	0	0			0
Soil_refseq	29432	Psychrobacter_phenylpyruvicus	3275513	31	0	0			0
Soil_refseq	29433	Moraxella_ovis	2306095	15	0	0			0
Soil_refseq	29435	Pseudomonas_flavescens	5849540	406	10	0.0246305	92.9428	11.9	0.0102914
Soil_refseq	29438	Pseudomonas_savastanoi	5999881	107	0	0			0
Soil_refseq	29442	Pseudomonas_tolaasii	6792797	241	3	0.0124481	93.3889	6.33333	0.00317984
Soil_refseq	29443	Paucimonas_lemoignei	4215120	469	10	0.021322	94.6714	22.5	0.0197622
Soil_refseq	29446	Xanthomonas_sp.	5069976	1850	507	0.274054	97.6097	35.2071	1.12878
Soil_refseq	29447	Xanthomonas_albilineans	3756117	677	18	0.0265879	92.4639	5.22222	0.0416121
Soil_refseq	29448	Bradyrhizobium_elkanii	9518205	1609	20	0.0124301	94.2259	19.7	0.0176294
Soil_refseq	29449	Rhizobium_etli	6530228	645	0	0			0
Soil_refseq	29450	Rhizobium_leucaenae	6679728	489	2	0.00408998	92.3651	3	0.00321869
Soil_refseq	29459	Brucella_melitensis	3294931	58	1	0.0172414	96.6292	1	0.00273147
Soil_refseq	29460	Brucella_neotomae	3329628	5	0	0			0
Soil_refseq	29461	Brucella_suis	3315175	20	1	0.05	97.351	1	0.00458498
Soil_refseq	29466	Veillonella_parvula	2132142	23	6	0.26087	95.5528	24.6667	0.0190888
Soil_refseq	29471	Pectobacterium_atrosepticum	5024250	30	0	0			0
Soil_refseq	29483	Yersinia_aldovae	4471090	54	0	0			0
Soil_refseq	29484	Yersinia_frederiksenii	4941872	65	0	0			0
Soil_refseq	29485	Yersinia_rohdei	4372253	53	0	0			0
Soil_refseq	29486	Yersinia_ruckeri	3894226	74	2	0.027027	94.3532	23	0.00467359
Soil_refseq	29488	Photorhabdus_luminescens	5464970	56	0	0			0
Soil_refseq	29489	Aeromonas_enteropelogenes	4392400	211	0	0			0
Soil_refseq	29494	Vibrio_furnissii	4993326	108	1	0.00925926	90.1316	2	0.00304406
Soil_refseq	29495	Vibrio_navarrensis	4439391	118	2	0.0169492	94.0397	13.5	0.00684779
Soil_refseq	29497	Vibrio_splendidus	5449819	135	0	0			0
Soil_refseq	29498	Vibrio_tubiashii	5540337	78	35	0.448718	98.4202	38.3714	0.0583719
Soil_refseq	29503	Desulfomicrobium_escambiense	3782107	458	1	0.00218341	92.1569	3	0.00137489
Soil_refseq	29506	Leptospira_inadai	4457871	24	0	0			0
Soil_refseq	29507	Leptospira_kirschneri	4409424	10	0	0			0
Soil_refseq	29508	Leptospira_meyeri	4237206	28	0	0			0
Soil_refseq	29510	Turneriella_parva	4409302	123	2	0.0162602	95.1821	12.5	0.00528428
Soil_refseq	29511	Leptospira_wolbachii	4081981	11	0	0			0
Soil_refseq	29518	Borreliella_afzelii	987652	2	0	0			0
Soil_refseq	29519	Borreliella_garinii	905692	8	0	0			0
Soil_refseq	29520	Borrelia_crocidurae	920157	2	0	0			0
Soil_refseq	29522	Brachyspira_aalborgi	2609344	55	0	0			0
Soil_refseq	29524	Porphyromonas_circumdentaria	2033794	16	0	0			0
Soil_refseq	29528	Flammeovirga_aprica	9310590	101	0	0			0
Soil_refseq	29529	Chitinophaga_arvensicola	8316369	269	1	0.00371747	93.3333	8	0.00091386
Soil_refseq	29530	Cytophaga_aurantiaca	4425125	258	21	0.0813953	97.1133	31.381	0.0211293
Soil_refseq	29533	Flavobacterium_pectinovorum	5610979	273	2	0.00732601	98.6755	42	0.00292284
Soil_refseq	29534	Flavobacterium_saccharophilum	5209309	114	2	0.0175439	99.3377	42	0.00291785
Soil_refseq	29536	Flavobacterium_succinicans	3664904	125	0	0			0
Soil_refseq	29539	Thermoleophilum_album	2207191	9212	453	0.049175	93.9181	15.585	0.644303
Soil_refseq	29542	Syntrophotalea_acetylenica	3176363	208	1	0.00480769	96.0265	24	0.00478535
Soil_refseq	29543	Pelobacter_propionicus	4241119	347	19	0.054755	99.9294	1	0.0348493
Soil_refseq	29545	Azoarcus_indigens	5464470	631	2	0.00316957	93.3684	13	0.00417241
Soil_refseq	29546	Lawsonia_intracellularis	1719192	33	0	0			0
Soil_refseq	29549	Rhodothermus_marinus	3386737	2076	15	0.00722543	95.9015	25	0.0455896
Soil_refseq	29552	Haploplasma_axanthum	1883099	17	4	0.235294	100	21.5	0.0101429
Soil_refseq	29553	Mycoplasmopsis_bovirhinis	922012	11	0	0			0
Soil_refseq	29554	Metamycoplasma_canadense	693241	2	0	0			0
Soil_refseq	29555	Mycoplasmopsis_canis	897443	12	0	0			0
Soil_refseq	29556	Mycoplasmopsis_gallinacea	1074838	8	0	0			0
Soil_refseq	29557	Mycoplasmopsis_gallinarum	834674	5	0	0			0
Soil_refseq	29559	Metamycoplasma_hyosynoviae	889181	15	0	0			0
Soil_refseq	29560	Mycoplasma_imitans	922439	2	0	0			0
Soil_refseq	29561	Mycoplasmopsis_meleagridis	644173	4	0	0			0
Soil_refseq	29562	Mesomycoplasma_ovipneumoniae	1081520	19	0	0			0
Soil_refseq	29563	Halanaerobium_salsuginis	2991186	12	0	0			0
Soil_refseq	29571	Halomonas_subglaciescola	3110197	592	25	0.0422297	96.314	3.68	0.0495467
Soil_refseq	29573	Halomonas_halophila	3563217	58	8	0.137931	92.9845	11.125	0.0212448
Soil_refseq	29575	Taylorella_equigenitalis	1704267	15	1	0.0666667	96.7213	1	0.00363793
Soil_refseq	29581	Janthinobacterium_lividum	6373589	660	1	0.00151515	94.1176	23	0.00161604
Soil_refseq	31899	Caldicellulosiruptor_bescii	2931662	7	0	0			0
Soil_refseq	31909	Halothermothrix_orenii	2578146	52	10	0.192308	98.9388	25.6	0.0329306
Soil_refseq	31910	Halovibrio_variabilis	3729154	258	6	0.0232558	95.1019	23.6667	0.0147755
Soil_refseq	31943	Brevibacterium_iodinum	3614741	158	41	0.259494	98.1684	35.3902	0.116136
Soil_refseq	31958	Amycolatopsis_orientalis	9490992	4060	66	0.0162562	95.2786	23.3333	0.0559794
Soil_refseq	31959	Amycolatopsis_lurida	9047228	588	21	0.0357143	94.5911	20.0952	0.0187129
Soil_refseq	31962	Actinomadura_rifamycini	8385432	1246	508	0.407705	96.3122	27.876	0.609748
Soil_refseq	31971	Amedibacillus_dolichus	2191053	13	0	0			0
Soil_refseq	31973	Eggerthia_catenaformis	1945158	8	0	0			0
Soil_refseq	31998	Methylobacterium_radiotolerans	6899110	351	0	0			0
Soil_refseq	32002	Achromobacter_denitrificans	6736870	1222	40	0.0327332	95.8601	23.9	0.063813
Soil_refseq	32013	Comamonas_terrigena	4673011	10	0	0			0
Soil_refseq	32016	Cupidesulfovibrio_oxamicus	4022810	147	0	0			0
Soil_refseq	32040	Acidovorax_konjaci	5077528	551	11	0.0199637	93.1886	11.7273	0.017154
Soil_refseq	32046	Synechococcus_elongatus	2749599	176	0	0			0
Soil_refseq	32049	Synechococcus_sp._PCC_7002	3409935	5	0	0			0
Soil_refseq	32052	Synechococcus_sp._WH_8020	2661166	7	0	0			0
Soil_refseq	32053	Thermostichus_vulcanus	3717564	58	1	0.0172414	96.4912	40	0.00156016
Soil_refseq	32056	Dulcicalothrix_desertica	11416284	36	0	0			0
Soil_refseq	32062	Deinococcus_radiophilus	2827165	197	0	0			0
Soil_refseq	33007	Winkia_neuii	2270293	107	1	0.00934579	93.1507	8	0.00325949
Soil_refseq	33008	Rhodococcus_globerulus	6739623	178	0	0			0
Soil_refseq	33010	Cutibacterium_avidum	2526138	713	12	0.0168303	96.5123	31.8333	0.0435447
Soil_refseq	33011	Cutibacterium_granulosum	2179712	412	11	0.026699	98.6284	38.2727	0.0526216
Soil_refseq	33012	Propionimicrobium_lymphophilum	2035623	54	0	0			0
Soil_refseq	33018	Sporolactobacillus_laevolacticus	3590176	24	0	0			0
Soil_refseq	33025	Phascolarctobacterium_faecium	2454371	47	0	0			0
Soil_refseq	33028	Staphylococcus_saccharolyticus	2346516	16	0	0			0
Soil_refseq	33029	Anaerococcus_hydrogenalis	1908330	9	0	0			0
Soil_refseq	33030	Peptoniphilus_indolicus	2247968	10	0	0			0
Soil_refseq	33031	Peptoniphilus_lacrimalis	1883562	3	0	0			0
Soil_refseq	33032	Anaerococcus_lactolyticus	1936866	12	0	0			0
Soil_refseq	33033	Parvimonas_micra	1677398	30	0	0			0
Soil_refseq	33034	Anaerococcus_prevotii	1998633	18	0	0			0
Soil_refseq	33035	Blautia_producta	6197116	19	0	0			0
Soil_refseq	33036	Anaerococcus_tetradius	1725895	6	0	0			0
Soil_refseq	33037	Anaerococcus_vaginalis	1893964	16	0	0			0
Soil_refseq	33038	#NAME?	3549191	59	2	0.0338983	98.6111	42	0.00318382
Soil_refseq	33039	#NAME?	2979783	21	0	0			0
Soil_refseq	33040	Streptococcus_milleri	1943143	1	0	0			0
Soil_refseq	33043	Coprococcus_eutactus	3112919	12	2	0.166667	100	42	0.00202382
Soil_refseq	33044	Bartonella_doshiae	1844489	11	0	0			0
Soil_refseq	33045	Bartonella_grahamii	2369520	5	0	0			0
Soil_refseq	33046	Bartonella_taylorii	1948309	14	0	0			0
Soil_refseq	33047	Bartonella_vinsonii	1995085	15	1	0.0666667	97.3333	1	0.0075686
Soil_refseq	33049	Phaeovulum_veldkampii	3268293	287	6	0.0209059	95.0166	26.3333	0.0182052
Soil_refseq	33050	Sphingopyxis_macrogoltabida	5748623	1323	77	0.0582011	95.6025	22.8442	0.137042
Soil_refseq	33051	Sphingomonas_sanguinis	4053092	1798	6	0.00333704	94.8521	21	0.00890678
[truncated: 265,873+ more rows]

## Sheet: S4D Blood
Table S4D. Genome Coverage Checker output for Blood samples. Blood_refseq refers to the reads from all samples combined.
[truncated: 39,085 more rows]

[truncated: 1 more sheets: S4E Tumour]
