# Supplementary material for: From classification to confirmation: verifying taxonomic classifications by mapping metagenomic reads to reference genomes
Source: Research Square preprint supplement (doi:10.21203/rs.3.rs-8224247/v1), 2025-12-01
Supplement: Supplementary file 3 [file 348c85e05cdd03013e801451.xlsx]

## Sheet: S1A simulated
Table S1A. Simulated sample details. All samples are taken from Parks et al. (full citation in main text).
Sample name	ANI	Species diversity	Strain diversity
ani100_cHIGH_stTrue_r0	1	High	Yes
ani100_cHIGH_stTrue_r1
ani100_cHIGH_stTrue_r2
ani100_cHIGH_stTrue_r3
ani100_cHIGH_stTrue_r4
ani100_cHIGH_stTrue_r5
ani100_cHIGH_stTrue_r6
ani100_cHIGH_stTrue_r7
ani100_cHIGH_stTrue_r8
ani100_cHIGH_stTrue_r9
ani100_cLOW_stTrue_r0	1	Low	Yes
ani100_cLOW_stTrue_r1
ani100_cLOW_stTrue_r2
ani100_cLOW_stTrue_r3
ani100_cLOW_stTrue_r4
ani100_cLOW_stTrue_r5
ani100_cLOW_stTrue_r6
ani100_cLOW_stTrue_r7
ani100_cLOW_stTrue_r8
ani100_cLOW_stTrue_r9
ani95_cLOW_stTrue_r0	95%%	Low	Yes
ani95_cLOW_stTrue_r1
ani95_cLOW_stTrue_r2
ani95_cLOW_stTrue_r3
ani95_cLOW_stTrue_r4
ani95_cLOW_stTrue_r5
ani95_cLOW_stTrue_r6
ani95_cLOW_stTrue_r7
ani95_cLOW_stTrue_r8
ani95_cLOW_stTrue_r9
ani97_cHIGH_stTrue_r0	0.97	High	Yes
ani97_cHIGH_stTrue_r1
ani97_cHIGH_stTrue_r2
ani97_cHIGH_stTrue_r3
ani97_cHIGH_stTrue_r4
ani97_cHIGH_stTrue_r5
ani97_cHIGH_stTrue_r6
ani97_cHIGH_stTrue_r7
ani97_cHIGH_stTrue_r8
ani97_cHIGH_stTrue_r9
ani97_cLOW_stTrue_r0	0.97	Low	Yes
ani97_cLOW_stTrue_r1
ani97_cLOW_stTrue_r2
ani97_cLOW_stTrue_r3
ani97_cLOW_stTrue_r4
ani97_cLOW_stTrue_r5
ani97_cLOW_stTrue_r6
ani97_cLOW_stTrue_r7
ani97_cLOW_stTrue_r8
ani97_cLOW_stTrue_r9
ani99_cHIGH_stTrue_r0	0.99	High	Yes
ani99_cHIGH_stTrue_r1
ani99_cHIGH_stTrue_r2
ani99_cHIGH_stTrue_r3
ani99_cHIGH_stTrue_r4
ani99_cHIGH_stTrue_r5
ani99_cHIGH_stTrue_r6
ani99_cHIGH_stTrue_r7
ani99_cHIGH_stTrue_r8
ani99_cHIGH_stTrue_r9
ani99_cLOW_stTrue_r0	0.99	Low	Yes
ani99_cLOW_stTrue_r1
ani99_cLOW_stTrue_r2
ani99_cLOW_stTrue_r3
ani99_cLOW_stTrue_r4
ani99_cLOW_stTrue_r5
ani99_cLOW_stTrue_r6
ani99_cLOW_stTrue_r7
ani99_cLOW_stTrue_r8
ani99_cLOW_stTrue_r9

## Sheet: S1B real datasets
Table S1B. Details of samples taken from real datasets. All citations are in main text.
Dataset	Original sample name	Sample name	Other relevant metadata
Marine			Depth	Collection date	Latitude end	Latitude start	Longitude end	Longitude start	Size fraction lower threshold	Size fraction upper threshold
	ERR1701760	Marine1	25	2010-03-18T12:32	18.5679	18.5839	66.4581	66.4727	1.6	20
	ERR315861	Marine2	5	2009-11-18T10:46Z	42.1874	42.2038	17.7189	17.715	0.22	1.6
	ERR318620	Marine3	70	2009-12-15T17:32Z	33.93	33.9235	32.7322	32.8118	0.22	1.6
	ERR598946	Marine4	177	2011-04-16T19:52	-12.9057	-12.9794	-96.155	-96.0232	0.22	3
	ERR598951	Marine5	5	2009-11-23T11:18	39.3599	39.3888	19.4084	19.3905	0.22	1.6
	ERR598954	Marine6	5	2011-06-14T20:05	-23.24	-23.2811	-129.485	-129.395	0.22	3
	ERR315862	Marine7	5	2009-12-15T13:30Z	33.9203	33.9179	32.8411	32.898	0.22	1.6
	ERR598944	Marine8	800	2012-03-19T18:18	43.7649	43.7182	-16.8935	-16.8714	0.22	3
	ERR598950	Marine9	40	2009-09-15T18:45	35.5571	36.5533	-6.5586	-6.5669	0.22	1.6
	ERR598952	Marine10	30	2011-05-12T23:30	2.0663	2.0299	-84.5304	-84.5546	0.22	3
Soil			Treatment	Description
	P120R2	Soil1	Control	control plots adjacent to treatment plots
	P13O	Soil2	COHort	100% vegetable compost manufactured from horticultural greenhouse crop waste
	P5O	Soil3	COHort+SS	COHort + treated sewage sludge waste
	P8O	Soil4	SS	treated sewage sludge waste
	P4O	Soil5	COVG+SS	100% vegetable compost manufactured from garden waste + treated sewage sludge waste
	P18O	Soil6	Control	control plots adjacent to treatment plots
	P9O	Soil7	COHort	100% vegetable compost manufactured from horticultural greenhouse crop waste
	N2-S18	Soil8	Natural	natural soils of similar type to plots, but geographically separated
	P11O	Soil9	COHort+SS	COHort + treated sewage sludge waste
	P17O	Soil10	COHort+SS	COHort + treated sewage sludge waste
Stool			Type of sequencing	Collection site	Consent age	Diagnosis	Antibiotics	Sex
	HSM5MD5B	Stool1	metagenomics	Cincinnati	13	nonIBD	No	Female
	HSM5MD6Q	Stool2	metagenomics	Cincinnati	10	nonIBD	No	Female
	HSM67VEO	Stool3	metagenomics	Cincinnati	9	nonIBD	No	Female
	HSM6XRT8	Stool4	metatranscriptomics	Cincinnati	6	nonIBD	No	Female
	PSM6XBTR	Stool5	metagenomics	MGH Pediatrics	15	nonIBD	Yes	Male
	HSM5MD6I	Stool6	metatranscriptomics	Cincinnati	8	nonIBD	No	Male
	HSM67VDT	Stool7	metagenomics	Cincinnati	11	nonIBD	No	Male
	HSM6XRQS	Stool8	metagenomics	Cincinnati	13	nonIBD	No	Female
	HSMA33J3	Stool9	metagenomics	Cincinnati	14	nonIBD	No	Female
	PSM7J19N	Stool10	metagenomics	MGH Pediatrics	11	nonIBD	No	Male
Blood			Sequencing year	Birth year	Sex	Ethnicity
	PGPC_0053	Blood1	2016	1978	F	White
	PGPC_0030	Blood2	2016	1981	F	White (Middle ??)
	PGPC_0035	Blood3	2016	1956	M	White
	PGPC_0039	Blood4	2016	1986	F	White
	PGPC_0011	Blood5	2016	1963	F	White
	PGPC_0051	Blood6	2016	1987	M	White
	PGPC_0048	Blood7	2016	1972	M	White
	PGPC_0033	Blood8	2016	1963	M	White
	PGPC_0067	Blood9	2018	1931	F	White
	PGPC_0047	Blood10	2016	1981	M	White
Tumour			TCGA ID	Age	Sex	demographic.country_of_residence_at_enrollment	demographic.ethnicity	demographic.race	demographic.vital_status	diagnoses.ajcc_pathologic_stage	Reads in BAM file	Sequencing Center Name
	188354ee-420b-4822-aa33-ea890ccd74ba	Tumour1	TCGA-MP-A4TH	71	F	United States	not hispanic or latino	white	Alive	Stage IA	1849239142	Baylor College of Medicine
	1bc7a463-2e66-4c8b-a34f-05f7cca3b319	Tumour2	TCGA-55-1594	69	M	United States	not hispanic or latino	white	Alive	Stage IIIA	1489408665	Broad Institute of MIT and Harvard
	1d83b47d-66a8-4ae9-81bb-bdc03fa64ac6	Tumour3	TCGA-50-5933	72	M	United States	not hispanic or latino	white	Dead	Stage IIIB	345852938	Harvard Medical School
	23d86395-9e20-4cf9-bf7e-f76544a1f772	Tumour4	TCGA-49-4486	72	M	United States	not hispanic or latino	white	Dead	Stage IA	1105747326	Broad Institute of MIT and Harvard
	2bde43e2-fd4e-413e-adc7-c50bca75d358	Tumour5	TCGA-44-2659	65	F	United States	not hispanic or latino	white	Alive	Stage IIB	1190486494	Broad Institute of MIT and Harvard
	30b77a0c-3439-44e2-a586-5df68c0d0002	Tumour6	TCGA-49-4505	62	F	United States	not hispanic or latino	white	Dead	Stage IIB	161607508	Harvard Medical School
	42839a7d-81db-428a-ab3b-072acd26ca91	Tumour7	TCGA-50-5045	57	F	United States	not hispanic or latino	black or african american	Dead	'--	343714406	Harvard Medical School
	483ef1dc-150e-4623-ba11-772ade84e4e4	Tumour8	TCGA-67-6215	53	F	United States	not hispanic or latino	white	Alive	Stage IB	337068112	Harvard Medical School
	c57ef4f0-5be8-4761-9763-5052efdfd7d5	Tumour9	TCGA-50-6591	63	F	United States	not hispanic or latino	white	Dead	Stage IV	244468672	Harvard Medical School
	ec0ee49c-d1d4-490d-ba82-cfae6d451b8d	Tumour10	TCGA-49-4486	72	M	United States	not hispanic or latino	white	Dead	Stage IA	181824756	Harvard Medical School
