# Supplementary material for: From classification to confirmation: verifying taxonomic classifications by mapping metagenomic reads to reference genomes
Source: Research Square preprint supplement (doi:10.21203/rs.3.rs-8224247/v1), 2025-12-01
Supplement: Supplementary file 6 [file 6ee761a5ea24a74de344f9ac.xlsx]

## Sheet: Sheet1
Table S3. Full Genome Coverage Checker output for simulated samples, including information on the number of simulated reads within a sample/taxon combination. Note that RefSeq_simulated represents all reads for all samples, while other sample names without a replicate number on the end (i.e. _r1) include all reads for all samples within that group.
Sample	taxid	Species name	Reference genome length (bp)	Kraken reads assigned	Bowtie2 reads mapped	Proportion kraken reads mapped with Bowtie2	Bowtie2 mean identity of mapped reads (%)	Bowtie2 mean MAPQ of mapped reads	Bowtie2 genome fraction (%)	No. simulated reads
RefSeq_simulated	9	Buchnera_aphidicola	641454	17991	62	0.00344617	96.4487	26.3871	0.749391
RefSeq_simulated	11	Cellulomonas_gilvus	3526441	352	178	0.505682	100	41.7416	0.759292
RefSeq_simulated	14	Dictyoglomus_thermophilum	1959987	21	0	0			0
RefSeq_simulated	19	Syntrophotalea_carbinolica	3665893	1	0	0			0
RefSeq_simulated	23	Shewanella_colwelliana	4642543	49	2	0.0408163	95.6667	16	0.00650506
RefSeq_simulated	24	Shewanella_putrefaciens	4386330	11110	6836	0.615302	99.5058	40.4896	20.6066
RefSeq_simulated	25	Shewanella_hanedai	5939027	25	0	0			0
RefSeq_simulated	33	Myxococcus_fulvus	10824667	1	0	0			0
RefSeq_simulated	34	Myxococcus_xanthus	9139763	7362	4044	0.549307	97.9588	35.0875	6.25308
RefSeq_simulated	35	Corallococcus_macrosporus	8973512	64770	30318	0.468087	99.0408	39.6741	38.7867
RefSeq_simulated	41	Stigmatella_aurantiaca	9365767	16416	1071	0.0652412	95.2477	16.4837	1.64613
RefSeq_simulated	43	Cystobacter_fuscus	12282374	15	0	0			0
RefSeq_simulated	48	Archangium_gephyra	12489432	1	0	0			0
RefSeq_simulated	51	Chondromyces_apiculatus	11577721	15	0	0			0
RefSeq_simulated	52	Chondromyces_crocatus	11388132	3	0	0			0
RefSeq_simulated	54	Nannocystis_exedens	12059053	453015	229411	0.506409	100	40.9312	94.3449
RefSeq_simulated	56	Sorangium_cellulosum	13033779	190	0	0			0
RefSeq_simulated	69	Lysobacter_enzymogenes	6096022	58	7	0.12069	99.9054	37.7143	0.00820207
RefSeq_simulated	72	Simonsiella_muelleri	2469862	4	0	0			0
RefSeq_simulated	94	Stella_humosa	5832650	3	0	0			0
RefSeq_simulated	100	Ancylobacter_aquaticus	4831989	1	0	0			0
RefSeq_simulated	102	Polaribacter_glomeratus	4064562	4	0	0			0
RefSeq_simulated	114	Gemmata_obscuriglobus	8998893	11	0	0			0
RefSeq_simulated	120	Planctopirus_limnophila	5460085	16983	8688	0.51157	100	41.9403	21.2633
RefSeq_simulated	124	Blastopirellula_marina	6663851	1	0	0			0
RefSeq_simulated	128	Isosphaera_pallida	5529304	2	0	0			0
RefSeq_simulated	134	Methylocystis_parvus	4529117	2	0	0			0
RefSeq_simulated	139	Borreliella_burgdorferi	1321434	454067	226396	0.498596	99.3543	38.9424	94.7435
RefSeq_simulated	140	Borrelia_hermsii	1161689	6770	2965	0.437962	98.9621	38.3882	31.4846
RefSeq_simulated	141	Borrelia_parkeri	1030684	4	0	0			0
RefSeq_simulated	142	Borrelia_turicatae	1165365	2	0	0			0
RefSeq_simulated	143	Borrelia_anserina	1042690	29	5	0.172414	93.7333	3	0.0320325
RefSeq_simulated	144	Borrelia_coriaceae	1787333	852	415	0.487089	99.9968	40.7373	3.41391
RefSeq_simulated	158	Treponema_denticola	2843201	81462	39001	0.478763	98.0516	35.0693	77.0153
RefSeq_simulated	159	Brachyspira_hyodysenteriae	3085162	728962	363520	0.498682	99.4612	40.4446	98.6284
RefSeq_simulated	160	Treponema_pallidum	1139633	53103	35840	0.674915	99.966	41.2615	92.9871
RefSeq_simulated	162	Treponema_phagedenis	3372116	137	64	0.467153	99.9688	41.1719	0.286586
RefSeq_simulated	163	Treponema_bryantii	3516600	11	0	0			0
RefSeq_simulated	164	Treponema_pectinovorum	2224027	18	0	0			0
RefSeq_simulated	165	Treponema_saccharophilum	3459320	2	0	0			0
RefSeq_simulated	172	Leptospira_biflexa	3951448	273815	126882	0.463386	98.7663	39.0934	92.7377
RefSeq_simulated	173	Leptospira_interrogans	4630763	852509	528049	0.619406	98.9565	39.1376	99.5704
RefSeq_simulated	174	Leptospira_borgpetersenii	3992782	245007	193257	0.788782	99.8577	40.0504	75.8676
RefSeq_simulated	190	Aquaspirillum_serpens	2612795	1	0	0			0
RefSeq_simulated	192	Azospirillum_brasilense	7030811	20498	13387	0.653088	98.7918	38.3758	22.776
RefSeq_simulated	193	Azospirillum_lipoferum	7987183	39	9	0.230769	97.037	30.7778	0.0152494
RefSeq_simulated	195	Campylobacter_coli	1716536	657684	386520	0.587699	98.9744	38.3786	96.5465
RefSeq_simulated	196	Campylobacter_fetus	1804582	389737	183310	0.470343	99.5921	40.9428	98.6973
RefSeq_simulated	197	Campylobacter_jejuni	1641481	226189	149960	0.662985	98.8385	38.6271	89.3343
RefSeq_simulated	198	Campylobacter_hyointestinalis	1808149	126061	49057	0.389153	96.5861	27.0141	71.1418
RefSeq_simulated	199	Campylobacter_concisus	1840041	1053301	104995	0.0996819	95.5592	18.5452	45.426
RefSeq_simulated	200	Campylobacter_curvus	1974918	105	1	0.00952381	100	42	0.00764589
RefSeq_simulated	201	Campylobacter_lari	1488515	4557	527	0.115646	96.6479	25.5484	4.35703
RefSeq_simulated	202	Campylobacter_mucosalis	1773478	197	0	0			0
RefSeq_simulated	203	Campylobacter_rectus	2571679	40589	17325	0.42684	98.0017	34.1135	59.2575
RefSeq_simulated	204	Campylobacter_showae	2097887	17273	3653	0.211486	95.578	18.6767	20.814
RefSeq_simulated	206	Campylobacter_sputorum	1753386	7	0	0			0
RefSeq_simulated	210	Helicobacter_pylori	1696601	1760654	597522	0.339375	96.1973	24.157	91.8129
RefSeq_simulated	211	Helicobacter_sp._CLO-3	2245396	2	1	0.5	100	42	0.00672487
RefSeq_simulated	212	Helicobacter_acinonychis	1557588	50680	24953	0.492364	99.034	38.6701	88.9157
RefSeq_simulated	213	Helicobacter_cinaedi	2101402	208285	107262	0.514977	99.803	41.2662	96.7833
RefSeq_simulated	214	Helicobacter_felis	1672681	514345	224941	0.437335	98.1674	35.9036	97.4506
RefSeq_simulated	215	Helicobacter_fennelliae	2223074	11641	5598	0.480887	99.6509	39.5563	30.8966
RefSeq_simulated	216	Helicobacter_muridarum	2263336	232	109	0.469828	99.9327	40.7798	0.727157
RefSeq_simulated	217	Helicobacter_mustelae	1576607	741	332	0.448043	99.5066	40.2349	3.07667
RefSeq_simulated	227	Pseudoalteromonas_carrageenovora	4584980	39	18	0.461538	96.7447	31	0.0309925
RefSeq_simulated	228	Pseudoalteromonas_haloplanktis	3972527	1	0	0			0
RefSeq_simulated	235	Brucella_abortus	3296863	8262	8050	0.97434	99.6061	41.3901	10.0581
RefSeq_simulated	236	Brucella_ovis	3275590	24	24	1	99.3889	42	0.0310784
RefSeq_simulated	238	Elizabethkingia_meningoseptica	3874791	514348	234926	0.456745	99.0901	39.7495	96.9546
RefSeq_simulated	244	Planomicrobium_okeanokoites	3434210	20595	11562	0.561398	99.9166	41.4579	39.5675
RefSeq_simulated	245	Flavobacterium_aquatile	3490856	8714	4369	0.501377	100	41.91	17.2567
RefSeq_simulated	246	Chryseobacterium_balustinum	4974086	1069	453	0.423761	98.0358	33.1501	0.479686
RefSeq_simulated	247	Empedobacter_brevis	3792478	83	3	0.0361446	98.8889	41.3333	0.0119447
RefSeq_simulated	249	Terrimonas_ferruginea	4686152	1612	806	0.5	100	41.9119	2.5655
RefSeq_simulated	250	Chryseobacterium_gleum	5643321	30641	14148	0.461734	98.365	37.2786	29.9143
RefSeq_simulated	251	Psychroflexus_gondwanensis	3311768	2499	1268	0.507403	99.9858	41.3612	5.64285
RefSeq_simulated	252	Halomonas_halmophila	3253825	1	0	0			0
RefSeq_simulated	253	Chryseobacterium_indologenes	4929686	318506	201131	0.631483	99.306	40.9847	86.1275
RefSeq_simulated	254	Chryseobacterium_indoltheticum	4253895	2382945	853858	0.35832	97.5739	32.9796	86.3428
RefSeq_simulated	256	Myroides_odoratus	4242475	5839	2112	0.361706	97.2945	30.5805	7.12334
RefSeq_simulated	258	Sphingobacterium_spiritivorum	5138280	4070	2037	0.500491	99.9997	41.8738	5.78949
RefSeq_simulated	259	Sphingobacterium_thalpophilum	5962893	1379	695	0.503988	100	41.9942	1.74934
RefSeq_simulated	263	Francisella_tularensis	1870206	895660	498785	0.556891	98.5343	38.421	98.7718
RefSeq_simulated	266	Paracoccus_denitrificans	5242327	291	80	0.274914	95.5667	20.925	0.18942
RefSeq_simulated	271	Thermus_aquaticus	2338641	60	2	0.0333333	93.6667	3	0.0129135
RefSeq_simulated	274	Thermus_thermophilus	2116056	30035	14000	0.466123	98.5995	38.1271	59.0996
RefSeq_simulated	276	Thermus_filiformis	2386081	2817	1379	0.489528	100	41.3952	8.3317
RefSeq_simulated	277	Meiothermus_ruber	3097457	39482	19313	0.48916	99.6594	40.6009	58.4559
RefSeq_simulated	280	Xanthobacter_autotrophicus	5013287	9	0	0			0
RefSeq_simulated	285	Comamonas_testosteroni	5497097	51569	15538	0.301305	95.9243	21.8155	23.9601
RefSeq_simulated	287	Pseudomonas_aeruginosa	6264404	246194	160565	0.652189	98.7138	39.3519	83.4484
RefSeq_simulated	288	Pseudoalteromonas_atlantica	4468419	3	1	0.333333	100	42	0.00337927
RefSeq_simulated	292	Burkholderia_cepacia	8366868	6101049	3419552	0.560486	97.9268	35.8263	94.4159
RefSeq_simulated	293	Brevundimonas_diminuta	3438815	34999	18688	0.533958	98.6923	37.616	52.0388
RefSeq_simulated	294	Pseudomonas_fluorescens	6511547	84720	3410	0.0402502	95.2654	16.1877	5.19348
RefSeq_simulated	296	Pseudomonas_fragi	5077209	160	12	0.075	94.625	10.1667	0.013925
RefSeq_simulated	298	Pseudomonas_marginalis	6799674	4373	2497	0.571004	98.6255	39.302	5.15557
RefSeq_simulated	300	Pseudomonas_mendocina	5372474	203358	103336	0.508148	98.5037	37.1824	80.7157
RefSeq_simulated	301	Pseudomonas_oleovorans	4686340	4178	1889	0.45213	97.9892	33.1567	5.65258
RefSeq_simulated	303	Pseudomonas_putida	6156701	653995	69511	0.106287	95.2171	15.8213	33.2652
RefSeq_simulated	304	Pelomonas_saccharophila	5771016	1	0	0			0
RefSeq_simulated	305	Ralstonia_solanacearum	5530249	1578203	695736	0.440841	98.4396	36.6261	95.9734
RefSeq_simulated	316	Stutzerimonas_stutzeri	4545686	860314	442254	0.514061	98.8195	39.7536	94.3823
RefSeq_simulated	317	Pseudomonas_syringae	5868373	1982025	95134	0.0479984	95.228	15.9617	24.2656
RefSeq_simulated	329	Ralstonia_pickettii	5254771	2919	1654	0.566632	98.8306	37.0441	3.76353
RefSeq_simulated	337	Burkholderia_glumae	6820727	56752	26687	0.470239	99.6457	40.974	42.593
RefSeq_simulated	339	Xanthomonas_campestris	4942039	4391529	1891429	0.430699	97.8615	35.2135	97.3245
RefSeq_simulated	343	Xanthomonas_translucens	4649333	1332543	601109	0.451099	98.711	36.8354	98.3498
RefSeq_simulated	346	Xanthomonas_citri	5222255	337676	187255	0.55454	97.4348	32.1305	79.9874
RefSeq_simulated	347	Xanthomonas_oryzae	4846413	2011190	944451	0.469598	98.4322	36.9344	93.202
RefSeq_simulated	350	Zoogloea_ramigera	4605859	1	0	0			0
RefSeq_simulated	353	Azotobacter_chroococcum	5023055	740640	310108	0.418703	98.4219	37.1045	90.0212
RefSeq_simulated	354	Azotobacter_vinelandii	5365318	16947	8077	0.476604	99.7113	40.9864	20.0393
RefSeq_simulated	358	Agrobacterium_tumefaciens	6002464	285730	151528	0.530319	98.4132	38.6181	75.6748
RefSeq_simulated	359	Agrobacterium_rhizogenes	6215524	47317	9636	0.203648	98.8475	38.3724	13.0095
RefSeq_simulated	373	Agrobacterium_vitis	5754491	12866	2795	0.217239	95.6142	19.3116	6.89375
RefSeq_simulated	375	Bradyrhizobium_japonicum	9226248	418510	140523	0.33577	97.5448	32.8309	67.3395
RefSeq_simulated	376	Bradyrhizobium_sp.	5348614	121	3	0.0247934	94	4.66667	0.0031223
RefSeq_simulated	380	Sinorhizobium_fredii	6810864	647741	281817	0.435077	99.3007	39.2096	90.7986
RefSeq_simulated	381	Mesorhizobium_loti	7451806	942	105	0.111465	96.103	22.5905	0.1505
RefSeq_simulated	382	Sinorhizobium_meliloti	6926935	4787021	2111794	0.44115	99.0701	39.8954	97.5797
RefSeq_simulated	384	Rhizobium_leguminosarum	7598116	2112554	1251522	0.592421	98.8285	38.6198	98.0289
RefSeq_simulated	396	Rhizobium_phaseoli	6726041	531880	296941	0.558286	98.5583	37.1316	92.2134
RefSeq_simulated	399	Neorhizobium_galegae	6455027	36614	19570	0.534495	99.9515	41.3786	36.7606
RefSeq_simulated	408	Methylorubrum_extorquens	6123851	55149	19309	0.350124	98.9774	37.5979	35.134
RefSeq_simulated	410	Methylobacterium_organophilum	5319780	31	2	0.0645161	99.6689	42	0.0042107
RefSeq_simulated	414	Methylococcus_capsulatus	3304561	24055	11361	0.472293	99.1616	40.3001	39.5247
RefSeq_simulated	421	Methylomonas_methanica	5023270	1	0	0			0
RefSeq_simulated	428	Methylosinus_sporium	3785845	4251	1504	0.353799	99.0286	38.8205	5.54487
RefSeq_simulated	435	Acetobacter_aceti	3634414	2	0	0			0
RefSeq_simulated	436	Novacetimonas_hansenii	3549186	6015	2833	0.470989	99.135	40.5447	11.2
RefSeq_simulated	437	Acidomonas_methanolica	3681251	2	1	0.5	98	40	0.00410187
RefSeq_simulated	438	Acetobacter_pasteurianus	3403928	403597	186273	0.461532	98.4072	37.1483	93.1009
RefSeq_simulated	442	Gluconobacter_oxydans	2882437	141537	61037	0.431244	97.0529	29.646	77.9842
RefSeq_simulated	446	Legionella_pneumophila	3409143	2526436	1096574	0.43404	98.6021	37.6559	97.5973
RefSeq_simulated	447	Legionella_bozemanae	4232311	22288	9711	0.435705	98.5932	38.5663	27.8172
RefSeq_simulated	448	Legionella_erythra	3239140	94	39	0.414894	97.301	30.5385	0.0580401
RefSeq_simulated	449	Legionella_hackeliae	3570857	544	291	0.534926	99.6724	40.7904	1.09674
RefSeq_simulated	450	Legionella_longbeachae	4149158	2231	1067	0.478261	99.9588	41.4217	3.77226
RefSeq_simulated	451	Tatlockia_micdadei	3310028	95893	47016	0.490296	99.8669	41.3679	85.6604
RefSeq_simulated	452	Legionella_spiritensis	3348070	2208	977	0.442482	99.0233	39.4493	4.3129
RefSeq_simulated	453	Legionella_feeleii	3534250	10067	4335	0.430615	98.921	40.0032	16.5544
RefSeq_simulated	454	Legionella_israelensis	3111640	12959	5623	0.433907	98.714	39.1071	23.3476
RefSeq_simulated	455	Legionella_jamestowniensis	3409712	488	176	0.360656	99.3905	40.1875	0.75065
RefSeq_simulated	456	Legionella_jordanis	3133723	593216	298325	0.502894	99.9846	41.7265	97.8507
RefSeq_simulated	458	Legionella_rubrilucens	3186910	47	21	0.446809	97.3016	25.5238	0.0661456
RefSeq_simulated	460	Legionella_steigerwaltii	3998094	7	1	0.142857	94	3	0.0037768
RefSeq_simulated	463	Fluoribacter_dumoffii	3909670	3688	1789	0.485087	99.9974	41.8692	6.63552
RefSeq_simulated	464	Fluoribacter_gormanii	3872652	44558	20706	0.464698	99.6316	41.2129	53.6312
RefSeq_simulated	466	Legionella_maceachernii	3661065	23	13	0.565217	97.1282	8.23077	0.0258668
RefSeq_simulated	470	Acinetobacter_baumannii	3999136	760421	463234	0.609181	98.1794	36.0951	90.5567
RefSeq_simulated	471	Acinetobacter_calcoaceticus	3945682	207986	94227	0.453045	97.2484	30.9051	81.6136
RefSeq_simulated	476	Moraxella_bovis	2807142	6658	3208	0.481826	99.1276	38.6905	15.4397
RefSeq_simulated	477	Moraxella_lacunata	3178664	13597	8013	0.589321	99.9829	38.4309	30.5863
RefSeq_simulated	478	Moraxella_nonliquefaciens	2343743	138712	64989	0.468518	98.8564	39.1405	80.7496
RefSeq_simulated	480	Moraxella_catarrhalis	1994386	1029364	484232	0.470419	97.6496	32.8031	96.0507
RefSeq_simulated	483	Neisseria_cinerea	1832904	60615	30890	0.50961	97.6408	33.7843	79.392
RefSeq_simulated	484	Neisseria_flavescens	2231882	256	91	0.355469	96.0513	23.5275	0.133027
RefSeq_simulated	485	Neisseria_gonorrhoeae	2171755	279075	170367	0.61047	99.6966	39.9602	93.2291
RefSeq_simulated	486	Neisseria_lactamica	2200224	747387	401592	0.537328	98.1694	34.8746	95.8349
RefSeq_simulated	487	Neisseria_meningitidis	2181327	662564	392116	0.591816	98.1579	34.1329	98.6808
RefSeq_simulated	488	Neisseria_mucosa	2654294	2393	872	0.364396	96.2308	22.6927	4.13326
RefSeq_simulated	489	Neisseria_polysaccharea	2029584	2170	1123	0.517512	97.1732	30.8807	2.16838
RefSeq_simulated	490	Neisseria_sicca	2566407	4596	1817	0.395344	97.3454	30.2719	8.97936
RefSeq_simulated	492	Neisseria_animalis	2236930	153	0	0			0
RefSeq_simulated	493	Neisseria_canis	2569389	56	6	0.107143	99.1111	34.8333	0.0352613
RefSeq_simulated	494	Bergeriella_denitrificans	2549372	6	0	0			0
RefSeq_simulated	495	Neisseria_elongata	2406516	1073224	459153	0.427826	97.5596	32.9784	97.5627
RefSeq_simulated	496	Neisseria_macacae	2801968	148	58	0.391892	96.6559	25.5345	0.118131
RefSeq_simulated	498	Psychrobacter_immobilis	3243066	1	0	0			0
RefSeq_simulated	500	Thermomicrobium_roseum	2920744	1	0	0			0
RefSeq_simulated	502	Kingella_denitrificans	2220058	59337	30104	0.507339	99.9521	41.595	84.4525
RefSeq_simulated	504	Kingella_kingae	2006553	67076	31918	0.475848	98.8699	39.0342	81.1724
RefSeq_simulated	505	Kingella_oralis	2420532	13	8	0.615385	96.9238	25.625	0.0188801
RefSeq_simulated	511	Alcaligenes_faecalis	4248684	395898	189304	0.478164	98.5968	38.4171	94.1464
RefSeq_simulated	518	Bordetella_bronchiseptica	5199761	341	232	0.680352	99.1212	39.9612	0.594816
RefSeq_simulated	519	Bordetella_parapertussis	4775567	51	36	0.705882	99.0741	40.7778	0.0964493
RefSeq_simulated	520	Bordetella_pertussis	4088701	7694	6180	0.803223	99.9676	40.022	19.1311
RefSeq_simulated	521	Bordetella_avium	3721798	422560	208161	0.492619	99.9623	41.5826	99.6168
RefSeq_simulated	529	Brucella_anthropi	4858647	73675	31300	0.424839	98.0201	35.9149	43.695
RefSeq_simulated	531	Polaribacter_irgensii	2763458	4	0	0			0
RefSeq_simulated	533	Beijerinckia_indica	4418616	4406	2206	0.500681	100	41.49	7.21527
RefSeq_simulated	536	Chromobacterium_violaceum	4808040	673678	313157	0.464847	99.0869	40.1757	94.8793
RefSeq_simulated	539	Eikenella_corrodens	2192577	355640	156256	0.439366	97.433	31.1753	93.6135
RefSeq_simulated	542	Zymomonas_mobilis	2163236	103250	48843	0.473056	98.8903	39.7803	89.6302
RefSeq_simulated	545	Citrobacter_koseri	4735357	467095	293955	0.629326	99.0932	40.8958	92.6746
RefSeq_simulated	546	Citrobacter_freundii	5171093	807653	526749	0.652197	98.5662	38.651	77.4523
RefSeq_simulated	548	Klebsiella_aerogenes	5281764	3608136	1830787	0.507405	98.2158	35.8467	98.0425
RefSeq_simulated	549	Pantoea_agglomerans	4692018	120206	74651	0.621026	98.5374	38.2313	77.3366
RefSeq_simulated	550	Enterobacter_cloacae	5023439	14782	3286	0.222297	96.1171	22.567	0.842471
RefSeq_simulated	552	Erwinia_amylovora	3832351	330461	159379	0.482293	99.3	40.099	99.0352
RefSeq_simulated	553	Pantoea_ananatis	4867131	2174300	1022070	0.470069	97.7609	34.8593	95.7558
RefSeq_simulated	554	Pectobacterium_carotovorum	4892225	228860	130203	0.56892	97.8909	34.6303	82.5824
RefSeq_simulated	556	Dickeya_chrysanthemi	4813854	127203	54508	0.428512	97.6219	33.5812	71.2267
RefSeq_simulated	562	Escherichia_coli	5594605	302911	160338	0.529324	98.143	34.9556	60.7001
RefSeq_simulated	563	Shimwellia_blattae	4158725	13775	6941	0.503884	99.9913	41.0109	22.3366
RefSeq_simulated	564	Escherichia_fergusonii	4645928	116140	81077	0.698097	98.9917	39.213	71.8
RefSeq_simulated	565	Atlantibacter_hermannii	4554875	27073	13561	0.500905	99.835	41.6635	35.9068
RefSeq_simulated	566	Pseudescherichia_vulneris	4398823	46164	22331	0.483732	99.2482	39.0447	50.1188
RefSeq_simulated	569	Hafnia_alvei	4772047	2323463	1173715	0.505158	97.8298	34.0055	94.6387
RefSeq_simulated	571	Klebsiella_oxytoca	5857964	1041203	727248	0.698469	99.1189	40.4576	95.4389
RefSeq_simulated	573	Klebsiella_pneumoniae	5682322	612382	406026	0.663027	98.6127	37.8051	75.0213
RefSeq_simulated	575	Raoultella_planticola	5823931	294204	210968	0.717081	99.3387	41.0995	86.539
RefSeq_simulated	577	Raoultella_terrigena	5598454	58309	38930	0.66765	98.8332	39.808	59.137
RefSeq_simulated	580	Kluyvera_cryocrescens	4765584	86	6	0.0697674	95.4444	14.3333	0.00392397
RefSeq_simulated	582	Morganella_morganii	3889903	813527	391577	0.481333	97.8203	33.5754	97.4007
RefSeq_simulated	584	Proteus_mirabilis	4099895	1706889	928826	0.544163	98.0718	35.5586	93.7314
RefSeq_simulated	585	Proteus_vulgaris	4035522	2394	335	0.139933	97.0951	26.1075	0.57539
RefSeq_simulated	587	Providencia_rettgeri	4641942	11562	2652	0.229372	96.3152	23.6029	7.50841
RefSeq_simulated	588	Providencia_stuartii	4487528	23544	14658	0.622579	99.3174	40.0643	31.3603
RefSeq_simulated	614	Serratia_liquefaciens	5282719	1192461	750619	0.62947	98.8069	39.9224	93.6495
RefSeq_simulated	615	Serratia_marcescens	5160776	1521670	718859	0.472415	96.2514	24.5136	86.9912
RefSeq_simulated	618	Serratia_odorifera	5001108	949	101	0.106428	95.1955	16.2673	0.0263742
RefSeq_simulated	621	Shigella_boydii	4825405	324	207	0.638889	98.9309	39.0725	0.126145
RefSeq_simulated	622	Shigella_dysenteriae	5192674	121	93	0.768595	99.1183	40.914	0.0613364
RefSeq_simulated	623	Shigella_flexneri	4828820	1237	482	0.389652	98.9477	35.2033	0.365534
RefSeq_simulated	624	Shigella_sonnei	4994001	1097	615	0.56062	98.7947	38.8504	0.270745
RefSeq_simulated	628	Xenorhabdus_nematophila	4587917	30391	14437	0.475042	99.736	38.5514	36.927
RefSeq_simulated	630	Yersinia_enterocolitica	4625880	4100423	1691383	0.41249	97.8851	34.5439	98.9378
RefSeq_simulated	631	Yersinia_intermedia	4928910	414587	245851	0.593002	99.1616	40.1212	92.6699
RefSeq_simulated	632	Yersinia_pestis	4658411	18619	14914	0.80101	99.9568	40.1075	25.8023
RefSeq_simulated	633	Yersinia_pseudotuberculosis	4610200	1074	638	0.594041	99.2091	39.4859	1.28109
RefSeq_simulated	634	Yersinia_bercovieri	4401131	93026	68026	0.731258	99.4262	41.2151	65.1293
RefSeq_simulated	636	Edwardsiella_tarda	3802888	277360	133085	0.479828	99.5851	41.3956	94.6603
RefSeq_simulated	638	Arsenophonus_nasoniae	4987107	1	0	0			0
RefSeq_simulated	644	Aeromonas_hydrophila	4744448	1121452	616532	0.549762	97.6212	33.3743	98.6869
RefSeq_simulated	645	Aeromonas_salmonicida	4954811	1908021	939207	0.492241	98.108	36.4812	89.6779
RefSeq_simulated	646	Aeromonas_sobria	4683669	245377	118046	0.48108	97.4761	32.5262	73.3015
RefSeq_simulated	647	Aeromonas_sp.	4074263	3	0	0			0
RefSeq_simulated	648	Aeromonas_caviae	4586140	197198	127217	0.645123	98.3005	37.0786	88.4541
RefSeq_simulated	649	Aeromonas_eucrenophila	4540059	197	24	0.121827	94.8953	13.875	0.0340744
RefSeq_simulated	650	Aeromonas_jandaei	4551079	71160	36759	0.516568	97.4423	32.273	63.7816
RefSeq_simulated	651	Aeromonas_media	4531033	11516	5812	0.504689	98.1244	35.4585	15.8999
RefSeq_simulated	652	Aeromonas_schubertii	4140228	26747	12858	0.480727	99.3443	40.9106	36.6906
RefSeq_simulated	654	Aeromonas_veronii	4561870	5728394	3138874	0.54795	97.0662	30.1944	95.1755
RefSeq_simulated	656	Aeromonas_allosaccharophila	4630407	328364	164166	0.499951	97.1177	30.2509	83.9738
RefSeq_simulated	659	Photobacterium_phosphoreum	4550107	1407760	619034	0.43973	98.9914	39.0558	97.0268
RefSeq_simulated	661	Photobacterium_angustum	4882508	990602	482875	0.487456	99.0667	39.1089	99.1521
RefSeq_simulated	663	Vibrio_alginolyticus	5150420	120723	71213	0.589888	98.4559	37.4997	68.643
RefSeq_simulated	666	Vibrio_cholerae	4138412	1780757	1197690	0.672574	98.3855	37.5814	92.8639
RefSeq_simulated	668	Aliivibrio_fischeri	4273718	3694324	1529219	0.413937	97.4031	31.6443	94.3935
RefSeq_simulated	669	Vibrio_harveyi	5869008	396889	244072	0.614963	98.6339	38.4199	89.6501
RefSeq_simulated	670	Vibrio_parahaemolyticus	5165770	664135	450338	0.678082	98.6331	38.801	95.6992
RefSeq_simulated	671	Vibrio_proteolyticus	4745539	9	4	0.444444	96.3333	27.5	0.00819717
RefSeq_simulated	672	Vibrio_vulnificus	5007160	3961433	1675403	0.422929	97.5013	31.6615	94.6733
RefSeq_simulated	673	Grimontia_hollisae	3998439	11179	5314	0.475356	99.556	40.2495	18.074
RefSeq_simulated	674	Vibrio_mimicus	4443087	586156	287243	0.490045	98.2658	35.819	96.4324
RefSeq_simulated	675	Vibrio_cincinnatiensis	3800816	320	13	0.040625	96.2157	24.4615	0.028415
RefSeq_simulated	676	Vibrio_fluvialis	4827733	673131	393006	0.583848	98.3824	36.9921	97.4523
RefSeq_simulated	678	Vibrio_sp.	3654618	4	0	0			0
RefSeq_simulated	680	Vibrio_campbellii	5425575	452182	224054	0.495495	98.0237	35.0099	94.8865
RefSeq_simulated	685	Vibrio_diazotrophicus	4820957	66378	29818	0.449215	97.9286	34.5523	53.4001
RefSeq_simulated	687	Vibrio_gazogenes	4712479	37	23	0.621622	97.3913	34.9565	0.0112043
RefSeq_simulated	688	Aliivibrio_logei	4638003	296	12	0.0405405	94.8922	14.75	0.00545493
RefSeq_simulated	689	Vibrio_mediterranei	5651202	65146	34545	0.53027	98.0405	35.555	53.2311
RefSeq_simulated	691	Vibrio_natriegens	5175153	1588	743	0.467884	98.6112	38.0592	2.10633
RefSeq_simulated	693	Vibrio_nereis	4085582	346	48	0.138728	95.9028	22.2708	0.0330675
RefSeq_simulated	703	Plesiomonas_shigelloides	3860786	308110	159366	0.517237	97.7232	34.212	90.8575
RefSeq_simulated	714	Aggregatibacter_actinomycetemcomitans	2109143	1637280	737021	0.45015	99.1749	38.9892	99.4365
RefSeq_simulated	715	Actinobacillus_pleuropneumoniae	2318657	337621	179045	0.530314	99.0839	38.4835	97.0765
RefSeq_simulated	716	Actinobacillus_suis	2501598	14712	8257	0.561243	99.9515	41.3785	38.2721
RefSeq_simulated	717	Actinobacillus_capsulatus	2621135	202	82	0.405941	96.1061	23.3659	0.16119
RefSeq_simulated	718	Actinobacillus_equuli	2451991	292	130	0.445205	99.7028	40.5615	0.774187
RefSeq_simulated	720	Actinobacillus_lignieresii	2236520	981	506	0.5158	98.111	35.8083	1.09053
RefSeq_simulated	722	Actinobacillus_seminis	2467403	3	2	0.666667	97	32	0.00652508
RefSeq_simulated	723	Actinobacillus_ureae	2492689	3136	1647	0.525191	99.824	37.9593	9.28539
RefSeq_simulated	726	Haemophilus_haemolyticus	1934644	285588	126465	0.442823	96.5985	26.6483	91.4442
RefSeq_simulated	727	Haemophilus_influenzae	1890662	988749	550824	0.557092	97.9074	32.8919	97.8329
RefSeq_simulated	728	Avibacterium_paragallinarum	2521134	518768	207951	0.400855	98.6088	36.2229	95.0422
RefSeq_simulated	729	Haemophilus_parainfluenzae	2141704	1334978	615738	0.461235	98.0195	32.7233	98.5617
RefSeq_simulated	730	#NAME?	1589620	212362	98237	0.462592	99.2053	38.8954	99.8971
RefSeq_simulated	731	Histophilus_somni	2263857	187273	81175	0.433458	99.1199	39.6696	89.0561
RefSeq_simulated	732	Aggregatibacter_aphrophilus	2337153	219693	93113	0.423832	97.8521	33.5695	92.3285
RefSeq_simulated	733	Canicola_haemoglobinophilus	2436406	267629	120621	0.450702	99.2723	36.773	88.9246
RefSeq_simulated	734	Haemophilus_paracuniculus	2047249	269	1	0.00371747	100	42	0.00737575
RefSeq_simulated	735	Haemophilus_parahaemolyticus	2093459	40851	15470	0.378693	97.6942	32.7111	62.2189
RefSeq_simulated	736	Haemophilus_paraphrohaemolyticus	2138467	16627	9384	0.564383	99.9298	41.1359	46.3914
RefSeq_simulated	738	Glaesserella_parasuis	2313850	1314305	528719	0.40228	98.5346	35.2619	96.1664
RefSeq_simulated	739	Aggregatibacter_segnis	2022832	27431	14550	0.530422	99.4537	39.2715	64.2571
RefSeq_simulated	747	Pasteurella_multocida	2335516	703833	373344	0.530444	98.5748	37.8728	99.403
RefSeq_simulated	750	Gallibacterium_anatis	2408630	836776	341272	0.407842	98.4486	37.7402	96.4585
RefSeq_simulated	751	Avibacterium_avium	2205360	53	9	0.169811	98.0741	37.3333	0.0484275
RefSeq_simulated	752	Pasteurella_bettyae	2253160	24	3	0.125	94.8889	16.3333	0.0137585
RefSeq_simulated	753	Pasteurella_canis	2219635	144	1	0.00694444	94.6667	8	0.00680292
RefSeq_simulated	754	Pasteurella_dagmatis	2287213	9058	6278	0.693089	99.9856	41.4721	32.7961
RefSeq_simulated	755	Avibacterium_gallinarum	2342758	73	25	0.342466	97.7626	31.32	0.0955284
RefSeq_simulated	756	Pasteurella_langaaensis	1989693	5791	2865	0.494733	99.9944	41.9497	19.285
RefSeq_simulated	758	Rodentibacter_pneumotropicus	2434546	914586	411789	0.450246	98.8977	38.741	94.7307
RefSeq_simulated	761	Pasteurella_testudinis	3029577	165	0	0			0
RefSeq_simulated	762	Avibacterium_volantium	2230476	69	16	0.231884	96.0417	16.5	0.0478822
RefSeq_simulated	769	Anaplasma_centrale	1206806	1034	555	0.53675	99.9952	39.6631	6.70514
RefSeq_simulated	770	Anaplasma_marginale	1202435	142276	63460	0.446034	99.3734	40.0105	95.6349
RefSeq_simulated	774	Bartonella_bacilliformis	1445021	50794	24875	0.489723	99.5726	39.9133	91.3497
RefSeq_simulated	777	Coxiella_burnetii	2032807	340088	164406	0.483422	99.6928	40.6541	99.9445
RefSeq_simulated	779	Ehrlichia_ruminantium	1516355	35572	17245	0.484791	99.3497	39.5389	81.5161
RefSeq_simulated	781	Rickettsia_conorii	1268755	372	165	0.443548	97.4786	33.1636	1.40539
RefSeq_simulated	782	Rickettsia_prowazekii	1109804	4301	2162	0.502674	99.9578	41.7613	25.5512
RefSeq_simulated	783	Rickettsia_rickettsii	1257710	37	27	0.72973	97.1875	31.8148	0.262302
RefSeq_simulated	784	Orientia_tsutsugamushi	2078193	114806	46371	0.403907	98.287	23.102	80.059
RefSeq_simulated	785	Rickettsia_typhi	1111496	1051	522	0.49667	99.9144	41.3755	6.82827
RefSeq_simulated	786	Rickettsia_akari	1231060	194	66	0.340206	95.6502	20.7121	0.640261
RefSeq_simulated	787	Rickettsia_australis	1323280	2383	1279	0.536718	99.9032	40.9156	13.5872
RefSeq_simulated	788	Rickettsia_canadensis	1150228	2998	1515	0.505337	98.982	39.8139	16.8534
RefSeq_simulated	803	Bartonella_quintana	1588683	113	14	0.123894	94.2879	7.64286	0.0361306
RefSeq_simulated	807	Bartonella_elizabethae	2018538	26285	16128	0.613582	99.9945	40.9897	67.5885
RefSeq_simulated	813	Chlamydia_trachomatis	1042519	303707	152017	0.500538	99.7565	41.6335	99.7785
RefSeq_simulated	817	Bacteroides_fragilis	5241700	2283212	1397926	0.612263	99.3273	41.0566	96.2476
RefSeq_simulated	818	Bacteroides_thetaiotaomicron	6304193	681019	394312	0.579003	98.9872	38.9062	82.2912
RefSeq_simulated	820	Bacteroides_uniformis	4920161	348072	168757	0.484834	98.8299	38.2059	70.7811
RefSeq_simulated	821	Phocaeicola_vulgatus	5163189	578040	338836	0.586181	99.1795	40.2058	81.6294
RefSeq_simulated	823	Parabacteroides_distasonis	5348976	165661	79012	0.47695	98.4122	37.4685	62.8618
RefSeq_simulated	824	Campylobacter_gracilis	2281652	295	147	0.498305	100	41.6667	0.966756
RefSeq_simulated	826	Sebaldella_termitidis	4486650	91	46	0.505495	100	40.5652	0.154815
RefSeq_simulated	827	Campylobacter_ureolyticus	1820334	4836	1792	0.370554	97.1896	29.5915	13.4459
RefSeq_simulated	831	Butyrivibrio_fibrisolvens	4934347	370978	23860	0.0643165	97.4513	30.6876	17.1389
RefSeq_simulated	833	Fibrobacter_succinogenes	3843004	20836	11534	0.553561	99.9915	41.8164	36.2912
RefSeq_simulated	837	Porphyromonas_gingivalis	2354886	559025	268024	0.479449	99.194	39.0958	98.0824
RefSeq_simulated	839	Prevotella_ruminicola	3619559	3	0	0			0
RefSeq_simulated	840	Prevotella_loescheii	3508589	1943	1076	0.553783	100	41.4164	4.51466
RefSeq_simulated	844	Wolinella_succinogenes	2150449	1	0	0			0
RefSeq_simulated	849	Fusobacterium_gonidiaformans	1678881	77	11	0.142857	97.5758	29.3636	0.0702253
RefSeq_simulated	850	Fusobacterium_mortiferum	2716766	12539	6864	0.547412	99.2823	39.7841	28.8532
RefSeq_simulated	851	Fusobacterium_nucleatum	2180101	397488	71550	0.180005	95.4829	17.925	57.7928
RefSeq_simulated	852	Fusobacterium_perfoetens	2103008	222	0	0			0
RefSeq_simulated	853	Faecalibacterium_prausnitzii	3127383	52344	3121	0.0596248	96.1155	19.8568	8.78827
RefSeq_simulated	854	Fusobacterium_russii	1941804	335	6	0.0179104	95.3333	18	0.0251313
RefSeq_simulated	856	Fusobacterium_varium	3346458	15315	8593	0.561084	99.2211	39.8864	30.0205
RefSeq_simulated	858	Fusobacterium_necrogenes	2015236	287	89	0.310105	96.5847	26.573	0.605537
RefSeq_simulated	859	Fusobacterium_necrophorum	2288480	763068	303800	0.39813	99.1659	38.7857	99.446
RefSeq_simulated	860	Fusobacterium_periodonticum	2615003	6515	2801	0.429931	96.3389	22.3852	5.61873
RefSeq_simulated	861	Fusobacterium_ulcerans	3537675	61553	27183	0.441619	99.4337	40.0005	65.9717
RefSeq_simulated	865	Pectinatus_frisingensis	2881049	28	0	0			0
RefSeq_simulated	870	Dichelobacter_nodosus	1389350	5472	2694	0.492325	99.8832	40.9855	25.3108
RefSeq_simulated	873	Desulfocurvibacter_africanus	4200534	7	0	0			0
RefSeq_simulated	876	Desulfovibrio_desulfuricans	3554892	29	0	0			0
RefSeq_simulated	879	Megalodesulfovibrio_gigas	3796022	2	0	0			0
RefSeq_simulated	889	Paucidesulfovibrio_longus	3701832	7	0	0			0
RefSeq_simulated	891	Desulfuromonas_acetoxidans	3828328	3888	1945	0.500257	100	41.0668	7.37813
RefSeq_simulated	894	Desulfobulbus_propionicus	3851869	667	334	0.50075	100	41.482	1.30485
RefSeq_simulated	897	Desulfococcus_multivorans	4455976	6373	3191	0.500706	99.9992	41.116	10.1614
RefSeq_simulated	905	Acidaminococcus_fermentans	2329769	43	2	0.0465116	95.3642	23	0.00669594
RefSeq_simulated	907	Megasphaera_elsdenii	2478942	70887	36446	0.514142	99.146	39.3439	71.0452
RefSeq_simulated	912	Nitrobacter_hamburgensis	5011522	1	0	0			0
RefSeq_simulated	913	Nitrobacter_winogradskyi	3402093	1	0	0			0
RefSeq_simulated	915	Nitrosomonas_europaea	2812094	83	41	0.493976	99.9024	40.5366	0.220156
RefSeq_simulated	916	Nitrosomonas_eutropha	2781824	6415	3685	0.574435	99.5832	40.6602	16.7285
RefSeq_simulated	920	Acidithiobacillus_ferrooxidans	2982397	2	0	0			0
RefSeq_simulated	921	Starkeya_novella	4765023	10	0	0			0
RefSeq_simulated	927	Halothiobacillus_neapolitanus	2582886	2	0	0			0
RefSeq_simulated	929	Thermithiobacillus_tepidarius	2958498	3	0	0			0
RefSeq_simulated	930	Acidithiobacillus_thiooxidans	3415726	20503	7761	0.37853	98.0746	34.4633	25.6673
RefSeq_simulated	944	Ehrlichia_canis	1315030	18	5	0.277778	99.0667	38.2	0.0574131
RefSeq_simulated	945	Ehrlichia_chaffeensis	1176248	88187	43711	0.495663	99.8557	40.7486	99.4505
RefSeq_simulated	948	Anaplasma_phagocytophilum	1479407	41269	17307	0.41937	98.4774	35.2985	77.9265
RefSeq_simulated	950	Neorickettsia_risticii	879977	1	0	0			0
RefSeq_simulated	951	Neorickettsia_sennetsu	859006	415	208	0.501205	100	41.976	3.60975
RefSeq_simulated	954	Francisella_persica	1516676	1369	290	0.211833	94.521	11.2	0.58226
RefSeq_simulated	955	Wolbachia_pipientis	1267781	457	32	0.0700219	96.625	27.2188	0.343671
RefSeq_simulated	959	Bdellovibrio_bacteriovorus	3782950	36	0	0			0
RefSeq_simulated	960	Bacteriovorax_stolpii	3810309	87631	38480	0.439114	99.4504	39.9729	73.6681
RefSeq_simulated	964	Herbaspirillum_seropedicae	5509723	23546	11145	0.473329	98.9464	39.9557	25.8753
RefSeq_simulated	971	Selenomonas_ruminantium	3387070	11	0	0			0
RefSeq_simulated	979	Cellulophaga_lytica	3765936	1607	1135	0.706285	99.5091	41.0115	4.37498
RefSeq_simulated	982	Saccharicrinis_fermentans	5982061	7	0	0			0
RefSeq_simulated	983	Flavobacterium_flevense	4230539	4	0	0			0
RefSeq_simulated	986	Flavobacterium_johnsoniae	6096872	56791	25696	0.452466	99.1589	39.2952	45.6444
RefSeq_simulated	987	Aquimarina_latercula	6245252	4	0	0			0
RefSeq_simulated	988	Leeuwenhoekiella_marinoflava	4747764	6345	3199	0.504177	99.9992	41.9344	9.63896
RefSeq_simulated	989	Marinilabilia_salmonicolor	4982627	5061	2533	0.500494	100	41.9507	7.34881
RefSeq_simulated	990	Breznakibacter_xylanolyticus	4380952	3	0	0			0
RefSeq_simulated	991	Flavobacterium_hydatis	5902573	1346	681	0.505944	100	41.9236	1.7276
RefSeq_simulated	995	Solitalea_canadensis	5202069	1	0	0			0
RefSeq_simulated	996	Flavobacterium_columnare	3221278	104494	50650	0.484717	99.7404	39.2996	85.1016
RefSeq_simulated	999	Bernardetia_litoralis	4919337	6	0	0			0
RefSeq_simulated	1003	Thermoflexibacter_ruber	5504183	15894	7965	0.501133	100	41.655	19.6504
RefSeq_simulated	1004	Chitinophaga_sancti	8421768	1	0	0			0
RefSeq_simulated	1010	Sphingobacterium_mizutaii	4653048	64	0	0			0
RefSeq_simulated	1014	Weeksella_virosa	2287133	85	64	0.752941	100	41	0.422538
RefSeq_simulated	1015	Bergeyella_zoohelcum	2331468	54127	27408	0.506365	99.9764	41.264	81.5571
RefSeq_simulated	1017	Capnocytophaga_gingivalis	2838633	8	1	0.125	98.6667	42	0.00531946
RefSeq_simulated	1018	Capnocytophaga_ochracea	2612925	18705	9892	0.528843	98.014	34.6444	41.3902
RefSeq_simulated	1019	Capnocytophaga_sputigena	2855148	16761	7769	0.463516	99.0521	37.4611	32.9125
RefSeq_simulated	1022	Beggiatoa_alba	4265146	1	0	0			0
RefSeq_simulated	1027	Microscilla_marina	9771226	9	0	0			0
RefSeq_simulated	1028	Marivirga_sericea	4741005	156	78	0.5	100	41.8718	0.247627
RefSeq_simulated	1034	Afipia_clevelandensis	4399548	262	132	0.503817	100	41.9091	0.448705
RefSeq_simulated	1048	Marichromatium_gracile	3830035	174961	86859	0.496448	97.4978	32.736	87.5742
RefSeq_simulated	1050	Thermochromatium_tepidum	2958290	10	0	0			0
RefSeq_simulated	1053	Halorhodospira_halophila	2678452	2	0	0			0
RefSeq_simulated	1057	Thiococcus_pfennigii	4076754	2	0	0			0
RefSeq_simulated	1061	Rhodobacter_capsulatus	3871920	33925	16257	0.479204	99.6564	40.8786	46.0713
RefSeq_simulated	1063	Cereibacter_sphaeroides	4602977	166092	74079	0.446012	98.2817	37.0771	83.6508
RefSeq_simulated	1066	Rhodocyclus_tenuis	3854478	1	0	0			0
RefSeq_simulated	1067	Rhodocyclus_purpureus	3617966	1	0	0			0
RefSeq_simulated	1071	Rhodopila_globiformis	7248147	4	0	0			0
RefSeq_simulated	1074	Rhodoblastus_acidophilus	4711496	1537	767	0.499024	100	41.9492	2.4173
RefSeq_simulated	1075	Fuscovulum_blasticum	3706095	3	0	0			0
RefSeq_simulated	1076	Rhodopseudomonas_palustris	5457289	691869	308591	0.446025	98.3325	37.0861	92.8861
RefSeq_simulated	1079	Blastochloris_viridis	3724841	38000	19118	0.503105	100	41.3933	53.8579
RefSeq_simulated	1080	Afifella_marina	3963421	3	0	0			0
RefSeq_simulated	1082	Magnetospirillum_fulvum	3805060	7	0	0			0
RefSeq_simulated	1084	Pararhodospirillum_photometricum	3876289	2	0	0			0
RefSeq_simulated	1085	Rhodospirillum_rubrum	4406557	67506	33818	0.500963	99.9984	41.7002	68.043
RefSeq_simulated	1086	Rhodothalassium_salexigens	3358756	1	0	0			0
RefSeq_simulated	1087	Rhodovibrio_salinarum	4176524	1	0	0			0
RefSeq_simulated	1088	Rhodovibrio_sodomensis	5750741	1	0	0			0
RefSeq_simulated	1094	Chlorobium_phaeovibrioides	2094018	5401	2571	0.476023	99.803	41.592	16.8846
RefSeq_simulated	1096	Chlorobium_phaeobacteroides	3133902	1929	966	0.500778	100	39.9596	4.54973
RefSeq_simulated	1098	Prosthecochloris_vibrioformis	2305678	11	0	0			0
RefSeq_simulated	1100	Pelodictyon_luteolum	2364842	279	141	0.505376	100	41.4184	0.895705
RefSeq_simulated	1102	Prosthecochloris_aestuarii	2579695	462	292	0.632035	100	40.7534	1.68357
RefSeq_simulated	1112	Erythrobacter_neustonensis	3090363	11	0	0			0
RefSeq_simulated	1124	Chlorogloeopsis_fritschii	7751745	1	0	0			0
RefSeq_simulated	1126	Microcystis_aeruginosa	5263219	72838	28127	0.386158	96.952	28.6722	43.0738
RefSeq_simulated	1160	Planktothrix_agardhii	4904228	3099	1229	0.39658	97.8272	33.2905	3.58105
RefSeq_simulated	1164	Trichormus_azollae	5486145	27	0	0			0
RefSeq_simulated	1165	Anabaena_cylindrica	7063285	4	2	0.5	98.3333	1	0.00427563
RefSeq_simulated	1166	Dolichospermum_flos-aquae	5220684	1	0	0			0
RefSeq_simulated	1176	Aphanizomenon_flos-aquae	4347270	12	0	0			0
RefSeq_simulated	1178	Nostoc_commune	8198700	49	2	0.0408163	95	15.5	0.00189054
RefSeq_simulated	1179	Desmonostoc_muscorum	9635616	21	4	0.190476	94.6667	10.5	0.00347668
RefSeq_simulated	1219	Prochlorococcus_marinus	1704176	10288	0	0			0
RefSeq_simulated	1231	Nitrosospira_multiformis	3234309	3	0	0			0
RefSeq_simulated	1238	Piscirickettsia_salmonis	3351503	222355	95040	0.427425	98.9561	32.9922	93.4387
RefSeq_simulated	1244	Leuconostoc_gelidum	1893499	11903	4943	0.415273	96.7965	26.7758	26.1433
RefSeq_simulated	1245	Leuconostoc_mesenteroides	2075763	1033078	645904	0.625223	99.163	40.4871	98.3945
RefSeq_simulated	1246	Leuconostoc_lactis	1791608	9826	5130	0.522084	98.3019	37.0203	32.21
RefSeq_simulated	1247	Oenococcus_oeni	1892074	1358788	624324	0.459471	99.279	40.2414	98.1957
RefSeq_simulated	1249	Weissella_paramesenteroides	2007410	45674	18872	0.413189	98.1525	35.7879	67.3255
RefSeq_simulated	1251	Leuconostoc_fallax	1660517	519	54	0.104046	96.5675	25.9815	0.0875631
RefSeq_simulated	1252	Leuconostoc_carnosum	1701333	25297	11393	0.45037	99.3235	40.8958	59.8586
RefSeq_simulated	1254	Pediococcus_acidilactici	2044083	676428	289828	0.428468	98.6736	38.4392	92.7351
RefSeq_simulated	1255	Pediococcus_pentosaceus	1832387	288525	168457	0.583856	99.0513	40.1959	93.0116
RefSeq_simulated	1258	Peptoniphilus_asaccharolyticus	2320207	69	23	0.333333	97.6812	34	0.0777948
RefSeq_simulated	1260	Finegoldia_magna	1838801	56436	9292	0.164647	95.8829	20.9681	37.0198
RefSeq_simulated	1261	Peptostreptococcus_anaerobius	2083092	75635	34247	0.452793	99.4593	40.9306	81.1732
RefSeq_simulated	1264	Ruminococcus_albus	4482087	4086	2047	0.500979	100	39.6014	6.6656
RefSeq_simulated	1265	Ruminococcus_flavefaciens	3587803	5	0	0			0
RefSeq_simulated	1267	Sarcina_ventriculi	2549638	5000	3163	0.6326	99.9552	40.9605	16.9058
RefSeq_simulated	1270	Micrococcus_luteus	2495693	203068	117674	0.579481	98.3778	36.6874	94.8427
RefSeq_simulated	1272	Kocuria_varians	2843576	26	0	0			0
RefSeq_simulated	1273	Micrococcus_lylae	2670883	10567	6542	0.619097	99.2289	40.2725	29.3907
RefSeq_simulated	1274	Dermacoccus_nishinomiyaensis	3113642	6779	3888	0.573536	98.314	36.9285	15.3828
RefSeq_simulated	1275	Kocuria_rosea	3953419	114962	65444	0.569266	99.282	39.7047	87.05
RefSeq_simulated	1276	Kytococcus_sedentarius	2783568	68	11	0.161765	96.303	26	0.0547499
RefSeq_simulated	1280	Staphylococcus_aureus	2821361	392420	246759	0.628814	98.7646	38.1281	88.0406
RefSeq_simulated	1281	Staphylococcus_carnosus	2571374	146464	70267	0.479756	99.7689	41.5462	94.2717
RefSeq_simulated	1282	Staphylococcus_epidermidis	2491058	398583	256643	0.643888	98.0643	35.1868	94.2632
RefSeq_simulated	1283	Staphylococcus_haemolyticus	2572027	304470	195136	0.640904	98.5613	37.1785	91.6968
RefSeq_simulated	1284	Staphylococcus_hyicus	2472129	49836	23319	0.467915	99.3357	40.3386	69.6922
RefSeq_simulated	1285	Staphylococcus_intermedius	2891525	17031	7884	0.462921	99.7455	40.9186	32.5786
RefSeq_simulated	1286	Staphylococcus_simulans	2682239	781681	479384	0.613273	98.8986	39.4698	95.2402
RefSeq_simulated	1288	Staphylococcus_xylosus	2757557	567297	270984	0.477676	98.7667	39.305	97.5924
RefSeq_simulated	1290	Staphylococcus_hominis	2257431	182860	117820	0.644318	98.3687	37.1276	91.9244
RefSeq_simulated	1292	Staphylococcus_warneri	2541629	34771	22366	0.643237	99.2267	39.8085	54.2246
RefSeq_simulated	1293	Staphylococcus_gallinarum	2942339	1162264	528130	0.454398	99.2571	40.7358	95.6514
RefSeq_simulated	1294	Staphylococcus_muscae	2095116	560	7	0.0125	94.5777	8.57143	0.0234832
RefSeq_simulated	1295	Staphylococcus_schleiferi	2520325	717	441	0.615063	96.7982	27.093	1.90027
RefSeq_simulated	1296	Mammaliicoccus_sciuri	2811859	623604	368367	0.590707	98.4282	36.9739	97.0772
RefSeq_simulated	1299	Deinococcus_radiodurans	3279598	2837	1446	0.509693	99.9867	41.6155	6.37535
RefSeq_simulated	1302	Streptococcus_gordonii	2187618	1473864	726021	0.492597	97.2167	29.8605	98.608
RefSeq_simulated	1303	Streptococcus_oralis	1931548	154525	80853	0.523236	98.369	34.423	92.7579
RefSeq_simulated	1304	Streptococcus_salivarius	2210574	271584	127519	0.469538	97.184	30.3861	87.9007
RefSeq_simulated	1305	Streptococcus_sanguinis	2296927	3575182	1489381	0.416589	97.0556	28.2743	99.0059
RefSeq_simulated	1307	Streptococcus_suis	2170808	4725575	1858385	0.393261	98.0479	34.8172	96.5874
RefSeq_simulated	1308	Streptococcus_thermophilus	1791634	802570	398861	0.49698	99.1772	40.2157	96.94
RefSeq_simulated	1309	Streptococcus_mutans	2019345	2394601	1117902	0.466843	99.3084	40.9368	98.8118
RefSeq_simulated	1310	Streptococcus_sobrinus	2198571	186417	93473	0.501419	99.7053	40.5405	98.5796
RefSeq_simulated	1311	Streptococcus_agalactiae	2079123	201425	132902	0.659809	99.1074	40.3108	89.8508
RefSeq_simulated	1313	Streptococcus_pneumoniae	2110968	629048	400334	0.636412	98.8917	38.3313	97.4787
RefSeq_simulated	1314	Streptococcus_pyogenes	1746380	1259724	672826	0.534106	99.209	40.2958	98.9061
RefSeq_simulated	1317	Streptococcus_downei	2232110	3625	2533	0.698759	99.9748	39.8334	14.8987
RefSeq_simulated	1318	Streptococcus_parasanguinis	2153652	957400	338413	0.353471	96.2954	24.6545	77.1061
RefSeq_simulated	1322	Blautia_hansenii	3065949	1836	942	0.513072	99.9929	41.4926	4.5354
RefSeq_simulated	1323	Faecalicoccus_pleomorphus	2055154	50315	13665	0.271589	97.1531	30.1396	52.3389
RefSeq_simulated	1326	Streptococcus_acidominimus	2445682	3465	1599	0.461472	99.5631	39.5072	9.36945
RefSeq_simulated	1328	Streptococcus_anginosus	1953654	164060	79069	0.481952	98.086	33.9967	90.1657
RefSeq_simulated	1329	Streptococcus_canis	2084744	624461	291487	0.466782	99.493	40.9059	92.3943
RefSeq_simulated	1333	Streptococcus_criceti	2431956	377	132	0.350133	98.5505	33.5455	0.473611
RefSeq_simulated	1334	Streptococcus_dysgalactiae	2174327	845850	398091	0.47064	98.229	35.6559	93.5114
RefSeq_simulated	1335	Streptococcus_equinus	1797051	1051650	483363	0.459623	98.3055	37.4776	97.4979
RefSeq_simulated	1336	Streptococcus_equi	2154778	837309	324858	0.387979	97.7181	32.6253	93.1701
RefSeq_simulated	1337	Streptococcus_hyointestinalis	2553358	280	0	0			0
RefSeq_simulated	1338	Streptococcus_intermedius	1932951	334404	166497	0.497892	98.9477	39.4869	97.6939
RefSeq_simulated	1339	Streptococcus_macacae	1930691	886	437	0.493228	99.5301	39.3043	2.65739
RefSeq_simulated	1340	Streptococcus_porcinus	2033046	43484	20881	0.4802	99.6425	40.7221	73.4585
RefSeq_simulated	1341	Streptococcus_ratti	2096943	211	124	0.587678	99.9247	40.7097	0.881617
RefSeq_simulated	1343	Streptococcus_vestibularis	1950305	27438	13352	0.486624	98.142	34.6612	54.5528
RefSeq_simulated	1345	Streptococcus_ferus	1872314	196	0	0			0
RefSeq_simulated	1346	Streptococcus_iniae	2086959	21112	10428	0.493937	99.9435	39.8349	52.4809
RefSeq_simulated	1348	Streptococcus_parauberis	2164480	117263	52115	0.444428	99.558	41.3596	87.0276
RefSeq_simulated	1349	Streptococcus_uberis	1975601	322866	143750	0.445231	99.2928	40.5521	93.3144
RefSeq_simulated	1351	Enterococcus_faecalis	2870381	1153844	792460	0.6868	98.9519	40.3125	96.5747
RefSeq_simulated	1352	Enterococcus_faecium	2919198	397167	269603	0.678815	99.2174	39.0858	83.8096
RefSeq_simulated	1353	Enterococcus_gallinarum	3488294	70541	39672	0.562396	98.9723	39.9713	66.8776
RefSeq_simulated	1354	Enterococcus_hirae	2845651	1031713	510467	0.494776	99.2095	40.4613	98.5047
RefSeq_simulated	1355	Enterococcus_columbae	2545099	102	21	0.205882	98.4127	14.9048	0.0796433
RefSeq_simulated	1356	Enterococcus_sulfureus	2301651	5142	2495	0.48522	100	41.6196	14.879
RefSeq_simulated	1358	Lactococcus_lactis	2639081	1040593	572427	0.550097	98.8382	39.553	90.5389
RefSeq_simulated	1359	Lactococcus_cremoris	2427048	12145	1848	0.152161	96.2217	23.6818	0.860387
RefSeq_simulated	1363	Lactococcus_garvieae	2084337	215648	96628	0.448082	98.8491	40.031	79.2792
RefSeq_simulated	1364	Lactococcus_piscium	2405003	36	3	0.0833333	96.6667	27.6667	0.0187942
RefSeq_simulated	1365	Lactococcus_plantarum	1977763	4793	2367	0.493845	99.9814	41.9675	16.4682
RefSeq_simulated	1366	Lactococcus_raffinolactis	2295672	10212	4389	0.429788	99.5348	40.0166	24.405
RefSeq_simulated	1373	Planococcus_citreus	3429284	24	9	0.375	97.6306	33.5556	0.0324266
RefSeq_simulated	1376	Aerococcus_urinae	1974262	26052	6129	0.23526	96.1514	23.2726	30.2292
RefSeq_simulated	1377	Aerococcus_viridans	2199877	288	158	0.548611	99.2113	36.9557	0.885959
RefSeq_simulated	1379	Gemella_haemolysans	1905342	18	3	0.166667	94.8889	11.3333	0.01627
RefSeq_simulated	1381	Atopobium_minutum	1706966	13	10	0.769231	100	42	0.088461
RefSeq_simulated	1382	Lancefieldella_parvula	1543805	1889	945	0.500265	100	42	8.83246
RefSeq_simulated	1390	Bacillus_amyloliquefaciens	4149690	11355	9264	0.815852	98.6186	38.3438	6.2468
RefSeq_simulated	1391	Aneurinibacillus_aneurinilyticus	5313859	22	3	0.136364	94.4444	9.66667	0.00621018
RefSeq_simulated	1392	Bacillus_anthracis	5503926	131902	93229	0.706805	98.7071	36.6146	50.3835
RefSeq_simulated	1393	Brevibacillus_brevis	6726998	58308	17046	0.292344	95.5295	18.6994	27.2714
RefSeq_simulated	1394	#NAME?	3485582	18	12	0.666667	97.5659	31.4167	0.0395343
RefSeq_simulated	1396	Bacillus_cereus	5836971	846970	343404	0.40545	97.2248	30.2363	62.1442
RefSeq_simulated	1397	Niallia_circulans	5179558	41701	19445	0.466296	99.4693	41.1529	41.9424
RefSeq_simulated	1398	Weizmannia_coagulans	3366995	161659	58062	0.359163	96.8442	27.058	68.2458
RefSeq_simulated	1399	Cytobacillus_firmus	4803910	71	16	0.225352	98.625	20.3125	0.0164658
RefSeq_simulated	1401	Paenibacillus_lautus	7062432	1010	105	0.10396	95.449	18.1238	0.223761
RefSeq_simulated	1402	Bacillus_licheniformis	4227253	93615	56312	0.601528	99.1488	39.3263	47.8667
RefSeq_simulated	1404	Priestia_megaterium	5746548	2559469	1222926	0.477805	97.6434	33.4615	97.3748
RefSeq_simulated	1405	Bacillus_mycoides	5697065	424493	184812	0.435371	98.0243	34.6413	79.5135
RefSeq_simulated	1406	Paenibacillus_polymyxa	5967522	402949	252209	0.625908	98.6067	37.6753	88.7689
RefSeq_simulated	1407	Peribacillus_psychrosaccharolyticus	4681292	78	0	0			0
RefSeq_simulated	1408	Bacillus_pumilus	3704641	471209	211242	0.448298	96.7597	27.6843	94.7129
RefSeq_simulated	1409	Bacillus_sp._-in-_Bacteria-	3584858	5799	0	0			0
RefSeq_simulated	1411	Alkalihalobacillus_akibai	4740369	10	0	0			0
RefSeq_simulated	1413	Evansella_cellulosilytica	4681672	1	0	0			0
RefSeq_simulated	1418	Caldalkalibacillus_mannanilyticus	4534596	12	0	0			0
RefSeq_simulated	1421	Lysinibacillus_sphaericus	4681723	30912	192	0.00621118	95.797	17.9688	0.460685
RefSeq_simulated	1422	Geobacillus_stearothermophilus	2744723	16727	11054	0.660848	99.5054	40.3943	39.8379
RefSeq_simulated	1423	Bacillus_subtilis	4215606	551767	374048	0.677909	98.3681	37.5619	93.9361
RefSeq_simulated	1426	Parageobacillus_thermoglucosidasius	4004923	128857	64448	0.500151	99.8411	40.9341	87.7184
RefSeq_simulated	1428	Bacillus_thuringiensis	6260142	571011	243775	0.426918	98.1336	35.1021	68.2972
RefSeq_simulated	1445	Alkalihalobacillus_alcalophilus	4210001	11	5	0.454545	99.6	42	0.0178622
RefSeq_simulated	1449	Amphibacillus_xylanus	2569486	10	0	0			0
RefSeq_simulated	1451	Paenibacillus_amylolyticus	7361451	30353	16543	0.54502	97.694	33.8646	25.1771
RefSeq_simulated	1452	Bacillus_atrophaeus	4292910	632280	371015	0.586789	98.9845	40.2174	94.9238
RefSeq_simulated	1454	Schinkia_azotoformans	4472104	3	0	0			0
RefSeq_simulated	1455	Bacillus_badius	3963196	117641	54129	0.46012	99.0111	39.355	85.4822
RefSeq_simulated	1456	Bacillus_benzoevorans	4701532	33	0	0			0
RefSeq_simulated	1458	Metabacillus_fastidiosus	4410645	16	0	0			0
RefSeq_simulated	1462	Geobacillus_kaustophilus	3592666	212	134	0.632075	98.6288	36.6567	0.421303
RefSeq_simulated	1464	Paenibacillus_larvae	4378174	802531	355721	0.443249	99.5247	39.5695	95.6043
RefSeq_simulated	1465	Brevibacillus_laterosporus	5400144	328282	163168	0.497036	99.3012	40.0584	88.1173
RefSeq_simulated	1467	Lederbergia_lenta	4384366	1	0	0			0
RefSeq_simulated	1471	Bacillus_methanolicus	3426513	134	0	0			0
RefSeq_simulated	1472	Paenibacillus_pabuli	7329063	55	3	0.0545455	94.4444	11.3333	0.00615358
RefSeq_simulated	1473	Virgibacillus_pantothenticus	4761851	25	0	0			0
RefSeq_simulated	1478	Peribacillus_simplex	5645783	773	86	0.111255	96.3815	22.1395	0.156506
RefSeq_simulated	1479	Bacillus_smithii	3381292	276	0	0			0
RefSeq_simulated	1482	Virgibacillus_halodenitrificans	3917759	48222	20224	0.419394	98.9631	38.7863	51.3435
RefSeq_simulated	1488	Clostridium_acetobutylicum	4145581	14936	7977	0.534079	98.5076	38.5118	24.2195
RefSeq_simulated	1490	Paraclostridium_bifermentans	3566216	588794	252989	0.429673	97.4645	32.6284	81.6161
RefSeq_simulated	1491	Clostridium_botulinum	3903260	2237000	1116062	0.49891	98.5189	36.9461	97.936
RefSeq_simulated	1492	Clostridium_butyricum	4705596	560544	307686	0.548906	98.9065	38.9524	95.7409
RefSeq_simulated	1493	Clostridium_cellulovorans	5262222	191	0	0			0
RefSeq_simulated	1494	Clostridium_cochlearium	2435419	1839	81	0.0440457	94.7678	13.4938	0.262008
RefSeq_simulated	1495	Clostridium_cylindrosporum	2735032	41	0	0			0
RefSeq_simulated	1496	Clostridioides_difficile	4095894	1815912	878506	0.483782	98.9632	39.2937	98.2355
RefSeq_simulated	1497	Clostridium_formicaceticum	4586728	25	0	0			0
RefSeq_simulated	1498	Hathewaya_histolytica	2740791	21	2	0.0952381	94	3	0.00576476
RefSeq_simulated	1501	Clostridium_pasteurianum	4352852	1535	616	0.401303	100	40.4675	2.11641
RefSeq_simulated	1502	Clostridium_perfringens	3355233	3114590	1492577	0.479221	98.3278	36.9734	97.3164
RefSeq_simulated	1503	Gottschalkia_purinilytica	3397304	8	0	0			0
RefSeq_simulated	1504	Clostridium_septicum	3404718	9079	4274	0.470757	99.9685	40.4144	17.2086
RefSeq_simulated	1505	Paeniclostridium_sordellii	3534945	2838009	1224294	0.431392	98.271	36.8705	97.6442
RefSeq_simulated	1509	Clostridium_sporogenes	4141984	423044	237139	0.560554	98.913	37.8445	74.093
RefSeq_simulated	1510	Thermoclostridium_stercorarium	2974379	3300	1569	0.475455	99.8485	41.1855	7.6223
RefSeq_simulated	1512	#NAME?	5072209	99610	44468	0.446421	99.4955	41.1011	67.2078
RefSeq_simulated	1513	Clostridium_tetani	2873333	759471	353646	0.465648	99.4727	40.1069	98.7961
RefSeq_simulated	1515	Acetivibrio_thermocellus	3843301	89686	46187	0.514986	99.9952	40.7976	80.9318
RefSeq_simulated	1516	Thermoanaerobacter_thermohydrosulfuricus	2683588	2986	1865	0.624581	99.9242	41.2708	9.13497
RefSeq_simulated	1517	Thermoanaerobacterium_thermosaccharolyticum	2785752	2043	723	0.353891	98.774	37.8313	3.7867
RefSeq_simulated	1519	Clostridium_tyrobutyricum	3134437	22218	9546	0.429652	99.7079	40.8922	35.954
RefSeq_simulated	1520	Clostridium_beijerinckii	5950247	863686	364123	0.421592	97.6803	32.9439	92.9637
RefSeq_simulated	1521	Ruminiclostridium_cellulolyticum	4068724	1	0	0			0
RefSeq_simulated	1522	#NAME?	4513882	272480	141030	0.517579	98.8307	39.4169	84.3894
RefSeq_simulated	1525	Moorella_thermoacetica	2623349	857489	362392	0.42262	99.0453	40.1266	95.9193
RefSeq_simulated	1526	#NAME?	3113820	46	0	0			0
RefSeq_simulated	1527	Anaerocolumna_aminovalerica	4630141	1	0	0			0
RefSeq_simulated	1528	Eubacterium_barkeri	2954329	75	36	0.48	100	41.6667	0.184001
RefSeq_simulated	1529	Clostridium_cadaveris	3625784	6294	2744	0.435971	99.787	41.5394	10.7098
RefSeq_simulated	1530	Clostridium_carnis	5168057	31	18	0.580645	97.7109	33.6667	0.0396474
RefSeq_simulated	1531	Enterocloster_clostridioformis	5539047	198377	102351	0.515942	99.5388	40.6256	84.749
RefSeq_simulated	1533	Clostridium_fallax	2747337	566	0	0			0
RefSeq_simulated	1534	Clostridium_kluyveri	3955303	595	0	0			0
RefSeq_simulated	1537	Romboutsia_lituseburensis	3782458	133	3	0.0225564	96.8962	29	0.0119763
RefSeq_simulated	1538	Clostridium_ljungdahlii	4630065	2091	1738	0.831181	99.5867	40.6231	3.19188
RefSeq_simulated	1540	Clostridioides_mangenotii	2960967	172	0	0			0
RefSeq_simulated	1541	Terrisporobacter_mayombei	4064271	208	16	0.0769231	94.4167	9.0625	0.00915293
RefSeq_simulated	1542	Clostridium_novyi	2499078	11693	121	0.0103481	95.3213	11.4298	0.628072
RefSeq_simulated	1547	Erysipelatoclostridium_ramosum	3543719	222763	116903	0.524786	99.5413	41.197	63.2571
RefSeq_simulated	1548	Clostridium_scatologenes	5749410	271	10	0.0369004	94.8	13.1	0.015219
RefSeq_simulated	1553	Clostridium_tetanomorphum	4475070	844	30	0.035545	96.0222	22.7	0.0246253
RefSeq_simulated	1556	Gottschalkia_acidurici	3108248	98	49	0.5	100	41.9388	0.238044
RefSeq_simulated	1557	Peptoclostridium_litorale	3404633	3306	1654	0.500302	99.9996	39.9686	7.08673
RefSeq_simulated	1559	Clostridium_tertium	3874184	95740	51966	0.542783	98.7015	38.8561	47.9135
RefSeq_simulated	1561	Clostridium_baratii	3211717	109557	42822	0.390865	97.5531	32.1432	77.8746
RefSeq_simulated	1564	Desulforamulus_ruminis	3969014	2	0	0			0
RefSeq_simulated	1570	Halobacillus_halophilus	4170008	2509	1269	0.505779	99.9963	41.1158	4.51368
RefSeq_simulated	1571	Sporosarcina_ureae	3362333	6267	3926	0.626456	100	41.0125	15.9474
RefSeq_simulated	1575	Leifsonia_xyli	2686418	11	0	0			0
RefSeq_simulated	1579	Lactobacillus_acidophilus	1978847	58458	27563	0.471501	99.7491	41.4101	85.9037
RefSeq_simulated	1580	Levilactobacillus_brevis	2494328	1582267	663560	0.419373	98.3978	37.2466	98.9688
RefSeq_simulated	1581	Lentilactobacillus_buchneri	2537205	91341	45242	0.495309	99.8137	40.9602	90.4098
RefSeq_simulated	1582	Lacticaseibacillus_casei	2952961	1268	203	0.160095	97.9683	34.0099	0.303661
RefSeq_simulated	1583	Weissella_confusa	2216758	1098022	467759	0.426001	98.8248	38.8416	98.4412
RefSeq_simulated	1584	Lactobacillus_delbrueckii	1891796	396690	200823	0.506247	98.5398	35.8897	99.4241
RefSeq_simulated	1587	Lactobacillus_helveticus	2055814	1305837	582680	0.446212	99.0861	39.1599	98.7762
RefSeq_simulated	1588	Lentilactobacillus_hilgardii	3190226	277	134	0.483755	96.6773	26.6418	0.0957299
RefSeq_simulated	1589	Lactiplantibacillus_pentosus	3671373	308926	181436	0.587312	99.0104	38.5063	94.8369
RefSeq_simulated	1590	Lactiplantibacillus_plantarum	3223643	1155338	667317	0.577595	99.0273	39.3767	96.4517
RefSeq_simulated	1596	Lactobacillus_gasseri	1894360	749253	324972	0.433728	98.8631	38.7781	96.3487
RefSeq_simulated	1597	Lacticaseibacillus_paracasei	3025352	318162	190461	0.598629	98.6505	38.6895	92.349
RefSeq_simulated	1598	Limosilactobacillus_reuteri	2220255	3042891	1105281	0.363234	97.5019	32.0353	96.7657
RefSeq_simulated	1599	Latilactobacillus_sakei	2018071	567356	242577	0.427557	98.7594	38.0131	95.8
RefSeq_simulated	1600	Lactobacillus_acetotolerans	1683905	259	8	0.030888	100	42	0.0280301
RefSeq_simulated	1601	Ligilactobacillus_agilis	2162388	16590	6351	0.382821	98.2147	36.1792	34.1432
RefSeq_simulated	1602	Companilactobacillus_alimentarius	2401923	191	94	0.492147	100	41.1809	0.590943
RefSeq_simulated	1603	Amylolactobacillus_amylophilus	1610352	18	15	0.833333	99.4222	34.7333	0.11662
RefSeq_simulated	1604	Lactobacillus_amylovorus	1977087	51573	25772	0.499719	99.2335	39.9314	71.3529
RefSeq_simulated	1605	Ligilactobacillus_animalis	1906794	28959	13783	0.475949	99.6772	41.0801	63.0011
RefSeq_simulated	1606	Ligilactobacillus_aviarius	1680526	5300	1547	0.291887	96.7384	27.0718	12.5251
RefSeq_simulated	1607	Loigolactobacillus_bifermentans	3274863	16702	8383	0.501916	99.9986	41.5687	31.6352
RefSeq_simulated	1610	Loigolactobacillus_coryniformis	2951508	78887	37306	0.472904	99.6951	40.3577	77.7941
RefSeq_simulated	1612	Companilactobacillus_farciminis	2551839	5	0	0			0
RefSeq_simulated	1613	Limosilactobacillus_fermentum	2103331	1409904	673700	0.477834	99.4694	40.4024	96.9074
RefSeq_simulated	1614	Fructilactobacillus_fructivorans	1332231	384	159	0.414062	97.7072	34.0818	1.79766
RefSeq_simulated	1618	Liquorilactobacillus_mali	2611959	2512	1177	0.468551	99.9932	41.8963	6.5666
RefSeq_simulated	1620	Weissella_minor	1768499	1	0	0			0
RefSeq_simulated	1622	Ligilactobacillus_murinus	2290452	156	17	0.108974	97.451	14.5882	0.0890217
RefSeq_simulated	1623	Ligilactobacillus_ruminis	2066652	92306	37892	0.410504	98.2717	36.6042	86.8106
RefSeq_simulated	1624	Ligilactobacillus_salivarius	2071255	2506993	1076930	0.42957	98.1571	35.6425	91.4997
RefSeq_simulated	1625	Fructilactobacillus_sanfranciscensis	1360847	132642	62097	0.468155	99.4718	40.6312	94.4355
RefSeq_simulated	1629	Weissella_viridescens	1593241	5	0	0			0
RefSeq_simulated	1630	Kandleria_vitulina	2126709	172306	83807	0.486385	99.8758	41.7829	97.6598
RefSeq_simulated	1631	Fructobacillus_fructosus	1401260	6	0	0			0
RefSeq_simulated	1632	Limosilactobacillus_oris	2007883	2581	849	0.328942	97.4801	32.6455	6.0754
RefSeq_simulated	1633	Limosilactobacillus_vaginalis	1883554	2161	929	0.429894	99.5544	40.7815	7.1312
RefSeq_simulated	1638	Listeria_ivanovii	2919548	268861	131870	0.490476	99.6796	41.5659	95.2821
RefSeq_simulated	1639	Listeria_monocytogenes	2944528	3698556	2063083	0.557808	99.3526	40.0097	97.878
RefSeq_simulated	1640	Listeria_seeligeri	2797636	105070	49646	0.472504	98.5157	38.2582	86.2605
RefSeq_simulated	1641	Listeria_grayi	2751104	759	33	0.0434783	97.2929	28.0606	0.116935
RefSeq_simulated	1642	Listeria_innocua	2887185	29401	18447	0.627428	98.4109	37.0263	45.8248
RefSeq_simulated	1643	Listeria_welshimeri	2814137	40757	20085	0.492799	99.8426	41.1652	63.8542
RefSeq_simulated	1648	Erysipelothrix_rhusiopathiae	1787941	44237	24937	0.563714	98.6202	37.7786	79.4351
RefSeq_simulated	1650	Kurthia_zopfii	2991625	219068	98897	0.451444	99.2482	35.1524	85.9936
RefSeq_simulated	1655	Actinomyces_naeslundii	3152123	2090236	914274	0.437402	98.2268	36.6147	98.7628
RefSeq_simulated	1656	Actinomyces_viscosus	3491241	28	1	0.0357143	96	23	0.00432511
RefSeq_simulated	1657	Actinobaculum_suis	2368602	1	0	0			0
RefSeq_simulated	1659	Actinomyces_israelii	3980311	12	0	0			0
RefSeq_simulated	1660	Schaalia_odontolytica	2455831	2568	305	0.118769	96.4028	24.0033	1.59689
RefSeq_simulated	1661	Trueperella_pyogenes	2295822	329578	146292	0.443877	98.9042	39.7909	94.1522
RefSeq_simulated	1670	Arthrobacter_citreus	3553729	4	0	0			0
RefSeq_simulated	1673	Rhizobium_viscosum	7069622	6	0	0			0
RefSeq_simulated	1677	Arthrobacter_pascens	4634886	2	0	0			0
RefSeq_simulated	1680	Bifidobacterium_adolescentis	2089645	199758	102531	0.513276	99.0024	39.5306	90.5869
RefSeq_simulated	1681	Bifidobacterium_bifidum	2193720	1375760	657438	0.477873	99.2216	40.8722	97.8799
RefSeq_simulated	1683	Bifidobacterium_angulatum	2021974	3	0	0			0
RefSeq_simulated	1685	Bifidobacterium_breve	2269415	598501	399969	0.668285	99.0817	39.9301	97.6606
RefSeq_simulated	1686	Bifidobacterium_catenulatum	2079525	249	110	0.441767	97.9762	35.1909	0.254145
RefSeq_simulated	1687	Bifidobacterium_coryneforme	1755151	29309	18107	0.617797	98.5571	37.6557	71.57
RefSeq_simulated	1688	Bifidobacterium_cuniculi	2531592	2	2	1	99.6667	42	0.0119293
RefSeq_simulated	1689	Bifidobacterium_dentium	2635669	18190	10056	0.552831	99.2699	40.9205	28.1139
RefSeq_simulated	1691	Bifidobacterium_indicum	2280567	31	0	0			0
RefSeq_simulated	1692	Bifidobacterium_magnum	1825255	318	158	0.496855	99.9873	41.6139	1.28864
RefSeq_simulated	1694	Bifidobacterium_pseudolongum	1978157	1934029	814818	0.421306	99.0286	37.9122	99.6827
RefSeq_simulated	1697	Corynebacterium_ammoniagenes	2790185	1261	611	0.484536	100	41.4714	3.21986
RefSeq_simulated	1698	Brevibacterium_epidermidis	3703261	1	0	0			0
RefSeq_simulated	1703	Brevibacterium_linens	3814300	38	6	0.157895	96.7974	15.1667	0.0235954
RefSeq_simulated	1705	Corynebacterium_stationis	2862233	31770	13675	0.430438	98.4321	37.3675	47.9356
RefSeq_simulated	1708	Cellulomonas_fimi	4266344	17067	8731	0.511572	100	41.8779	26.5621
RefSeq_simulated	1709	Cellulomonas_biazotea	4407465	13	1	0.0769231	94.6667	8	0.00342601
RefSeq_simulated	1710	Cellulosimicrobium_cellulans	4411608	17	0	0			0
RefSeq_simulated	1711	Cellulomonas_flavigena	4123179	2	0	0			0
RefSeq_simulated	1712	Cellulomonas_gelida	3791351	3	0	0			0
RefSeq_simulated	1713	Oerskovia_turbata	4025089	376	188	0.5	100	42	0.702419
RefSeq_simulated	1714	Cellulomonas_uda	3567340	2	0	0			0
RefSeq_simulated	1717	Corynebacterium_diphtheriae	2463666	760769	452408	0.594672	98.513	37.6381	98.4876
RefSeq_simulated	1718	Corynebacterium_glutamicum	3309401	488622	273649	0.560042	98.4207	36.9334	88.663
RefSeq_simulated	1719	Corynebacterium_pseudotuberculosis	2337763	119340	57584	0.482521	99.1192	40.4756	96.1211
RefSeq_simulated	1721	Corynebacterium_callunae	2928683	862	421	0.488399	99.9493	40.9857	2.11901
RefSeq_simulated	1724	Corynebacterium_renale	2335089	5736	2629	0.458333	98.5179	37.1609	15.464
RefSeq_simulated	1725	Corynebacterium_xerosis	2686219	7674	2920	0.380506	98.1852	35.8555	15.0351
RefSeq_simulated	1727	Corynebacterium_variabile	3192709	33043	14180	0.429138	99.4482	40.992	47.1162
RefSeq_simulated	1732	Eubacterium_oxidoreducens	2912287	22695	11422	0.503283	100	41.7938	44.8071
RefSeq_simulated	1735	Holdemanella_biformis	2477128	110512	45514	0.411847	98.7248	37.7909	84.8739
RefSeq_simulated	1736	Eubacterium_limosum	4422837	12869	5239	0.407102	98.7266	38.2061	16.0114
RefSeq_simulated	1737	#NAME?	2943107	167	14	0.0838323	94.7143	10.5	0.029017
RefSeq_simulated	1744	Propionibacterium_freudenreichii	2507188	1303745	583194	0.447322	99.4036	40.2442	98.9261
RefSeq_simulated	1747	Cutibacterium_acnes	2494738	181463	141018	0.777117	99.4418	40.8149	86.3495
RefSeq_simulated	1748	Acidipropionibacterium_acidipropionici	3651382	42747	19797	0.46312	99.5494	40.2004	54.1472
RefSeq_simulated	1749	Acidipropionibacterium_jensenii	2999408	95200	43392	0.455798	99.3442	39.739	84.703
RefSeq_simulated	1750	Arachnia_propionica	3402349	49943	24522	0.491	99.711	40.8593	66.1361
RefSeq_simulated	1751	Acidipropionibacterium_thoenii	2938072	3	2	0.666667	99.3333	42	0.00582014
RefSeq_simulated	1764	Mycobacterium_avium	5173839	926251	590375	0.637381	99.1586	40.4435	90.3827
RefSeq_simulated	1766	Mycolicibacterium_fortuitum	6406072	1245736	634011	0.508945	98.9953	39.1126	97.4
RefSeq_simulated	1767	Mycobacterium_intracellulare	5645778	410543	216351	0.526987	97.8096	34.1932	87.4023
RefSeq_simulated	1768	Mycobacterium_kansasii	6577228	6901888	3618166	0.524228	99.9634	41.5964	96.0835
RefSeq_simulated	1769	Mycobacterium_leprae	3187112	2	0	0			0
RefSeq_simulated	1771	Mycolicibacterium_phlei	5313907	165078	81198	0.491877	99.9277	41.4101	89.1838
RefSeq_simulated	1772	Mycolicibacterium_smegmatis	6895172	663766	298043	0.449018	99.2125	39.3476	95.4495
RefSeq_simulated	1773	Mycobacterium_tuberculosis	4411532	20390	15767	0.773271	99.7292	40.2323	15.6599
RefSeq_simulated	1774	Mycobacteroides_chelonae	5029817	500786	235213	0.469688	96.6646	27.1006	88.0795
RefSeq_simulated	1775	Mycobacterium_cookii	5318517	6	0	0			0
RefSeq_simulated	1776	Mycolicibacterium_flavescens	5973602	33	2	0.0606061	96.6974	24	0.00508906
RefSeq_simulated	1777	Mycobacterium_gastri	5816659	1775	740	0.416901	95.6101	18.9351	0.202522
RefSeq_simulated	1778	Mycobacterium_gordonae	7601632	461	12	0.0260304	99.4444	38.75	0.0154704
RefSeq_simulated	1780	Mycobacterium_malmoense	5319859	5446	44	0.00807932	94.5159	11.25	0.122748
RefSeq_simulated	1781	Mycobacterium_marinum	6450522	436013	286617	0.657359	99.154	39.6987	93.9257
RefSeq_simulated	1782	Mycolicibacter_nonchromogenicus	4465329	23	1	0.0434783	95.3333	23	0.00338161
RefSeq_simulated	1783	Mycobacterium_scrofulaceum	6170273	155	11	0.0709677	95.2121	14.7273	0.0235808
RefSeq_simulated	1784	Mycobacterium_simiae	5788994	126	0	0			0
RefSeq_simulated	1786	Mycolicibacterium_sphagni	6066978	28	0	0			0
RefSeq_simulated	1787	Mycobacterium_szulgai	6672659	220	1	0.00454545	94	3	0.00226297
RefSeq_simulated	1788	Mycolicibacter_terrae	4566186	94	14	0.148936	95.6692	20.5714	0.0251413
RefSeq_simulated	1789	Mycobacterium_xenopi	5251936	23	20	0.869565	97.6	30.95	0.00995823
RefSeq_simulated	1790	Mycobacterium_asiaticum	5969538	76659	35734	0.466142	99.2106	40.561	58.8714
RefSeq_simulated	1791	Mycolicibacterium_aurum	6035584	16	0	0			0
RefSeq_simulated	1792	Mycolicibacterium_chitae	5461769	7	0	0			0
RefSeq_simulated	1794	Mycolicibacterium_gadium	5964999	3	0	0			0
RefSeq_simulated	1795	Mycolicibacterium_neoaurum	5421267	1285	622	0.484047	99.9957	41.6608	1.71962
RefSeq_simulated	1796	Mycobacterium_senegalense	6086722	27	12	0.444444	98.7222	4.41667	0.0120097
RefSeq_simulated	1797	Mycolicibacterium_thermoresistibile	4950685	13	3	0.230769	96	4	0.00915025
RefSeq_simulated	1798	Mycolicibacillus_trivialis	3591083	4	0	0			0
RefSeq_simulated	1799	Mycolicibacterium_aichiense	5925482	1	0	0			0
RefSeq_simulated	1800	Mycolicibacterium_chubuense	6021188	26392	13933	0.527925	99.9917	41.6813	29.4504
RefSeq_simulated	1801	Mycobacterium_diernhoferi	5998503	355	174	0.490141	100	41.954	0.432875
RefSeq_simulated	1802	Mycolicibacterium_farcinogenes	6607534	29	19	0.655172	99.0526	41.5789	0.0396517
RefSeq_simulated	1804	Mycolicibacterium_gilvum	5783292	57601	30297	0.52598	99.3742	39.493	48.4749
RefSeq_simulated	1807	Mycolicibacterium_obuense	5599206	33372	17692	0.530145	100	41.9311	37.7724
RefSeq_simulated	1809	Mycobacterium_ulcerans	6066298	3584	2218	0.618862	98.5595	38.2227	2.05524
RefSeq_simulated	1810	Mycolicibacterium_vaccae	6235754	122525	61895	0.505162	100	41.869	77.6999
RefSeq_simulated	1814	Amycolatopsis_methanolica	7237391	77565	43269	0.557842	100	41.3743	58.9624
RefSeq_simulated	1822	Nocardia_vaccinii	9224040	15	2	0.133333	98	33	0.0022875
RefSeq_simulated	1823	Nocardia_otitidiscaviarum	7687583	12965	5482	0.422831	98.2649	37.4604	10.1194
RefSeq_simulated	1824	Nocardia_asteroides	6983363	66	8	0.121212	94.6013	12.625	0.0109403
RefSeq_simulated	1828	Rhodococcus_fascians	5519954	122335	66960	0.547349	97.9659	35.6809	71.422
RefSeq_simulated	1829	Rhodococcus_rhodochrous	5612657	566	42	0.0742049	97.0009	28.6905	0.108131
RefSeq_simulated	1830	Rhodococcus_ruber	5698851	42467	24474	0.576306	98.6891	37.3492	38.2766
RefSeq_simulated	1833	Rhodococcus_erythropolis	6806506	74739	53142	0.711034	98.6159	38.7587	54.9092
RefSeq_simulated	1836	Saccharopolyspora_erythraea	8212805	75107	37818	0.503522	100	41.3193	50.1952
RefSeq_simulated	1837	Saccharopolyspora_hirsuta	7549392	1	0	0			0
RefSeq_simulated	1838	Saccharopolyspora_hordei	5783988	33	0	0			0
RefSeq_simulated	1843	Nocardioides_jensenii	5102139	1	0	0			0
RefSeq_simulated	1844	Nocardioides_luteus	4956498	10	0	0			0
RefSeq_simulated	1848	Pseudonocardia_thermophila	6098214	4	0	0			0
RefSeq_simulated	1850	Actinopolyspora_halophila	5353291	18	3	0.166667	94.2485	4.66667	0.00849944
RefSeq_simulated	1852	Saccharomonospora_viridis	4308349	955	480	0.502618	100	41.8896	1.67122
RefSeq_simulated	1858	Frankia_sp._ArI3	7541222	6	0	0			0
RefSeq_simulated	1859	Frankia_alni	7497934	3	2	0.666667	100	42	0.00402778
RefSeq_simulated	1861	Geodermatophilus_obscurus	5322497	54	0	0			0
RefSeq_simulated	1863	Dermatophilus_congolensis	2627820	1	0	0			0
RefSeq_simulated	1866	Actinoplanes_missouriensis	8773466	19	0	0			0
RefSeq_simulated	1867	Actinoplanes_teichomyceticus	8287152	13	0	0			0
RefSeq_simulated	1868	Actinoplanes_digitatis	9128557	14	0	0			0
RefSeq_simulated	1869	Actinoplanes_utahensis	9417079	4	0	0			0
RefSeq_simulated	1874	Micromonospora_chalcea	6861996	1039	436	0.419634	96.0656	22.9312	0.672953
RefSeq_simulated	1877	Micromonospora_echinospora	7125866	81927	1025	0.0125111	94.8559	12.442	1.68862
RefSeq_simulated	1880	Micromonospora_olivasterospora	7071760	30	2	0.0666667	93.6667	3	0.00237565
RefSeq_simulated	1881	Micromonospora_viridifaciens	7073985	31	1	0.0322581	93.3333	3	0.00213458
RefSeq_simulated	1885	Streptomyces_actuosus	8451480	43	0	0			0
RefSeq_simulated	1886	Streptomyces_albidoflavus	7215712	336989	247850	0.735484	98.7619	39.309	85.548
RefSeq_simulated	1888	Streptomyces_albus	8033415	30096	4020	0.133573	99.6779	40.8537	6.4284
RefSeq_simulated	1889	Streptomyces_ambofaciens	8393598	6313	3125	0.49501	99.4445	39.6861	5.43325
RefSeq_simulated	1890	Streptomyces_antibioticus	7978920	471	212	0.450106	97.7776	35.0613	0.362793
RefSeq_simulated	1892	Streptomyces_anulatus	8847108	344	38	0.110465	95.5463	19.2105	0.0646991
RefSeq_simulated	1893	Streptomyces_atratus	9641288	138	0	0			0
RefSeq_simulated	1894	Kitasatospora_aureofaciens	8323899	13	0	0			0
RefSeq_simulated	1895	Streptomyces_avidinii	9032248	52	1	0.0192308	94.0789	8	0.00169393
RefSeq_simulated	1896	Streptomyces_bikiniensis	7391008	81	15	0.185185	97.9556	36.4	0.0131376
RefSeq_simulated	1898	Streptomyces_cacaoi	8443444	20	0	0			0
RefSeq_simulated	1901	Streptomyces_clavuligerus	8544086	55	0	0			0
RefSeq_simulated	1903	Streptomyces_corchorusii	10309547	37	2	0.0540541	93.3333	3	0.00158106
RefSeq_simulated	1904	Streptomyces_cyaneus	9833661	25	0	0			0
RefSeq_simulated	1905	Streptomyces_exfoliatus	7874957	45031	24084	0.534832	99.999	41.9701	36.6932
RefSeq_simulated	1906	Streptomyces_fradiae	6725579	1	1	1	89.2857	3	0.00251279
RefSeq_simulated	1907	Streptomyces_glaucescens	8426988	143	0	0			0
RefSeq_simulated	1908	Streptomyces_globisporus	7783599	75	4	0.0533333	96.1667	23	0.00775991
RefSeq_simulated	1909	Streptomyces_griseolus	7537539	113	16	0.141593	94	4.875	0.010932
RefSeq_simulated	1910	Streptomyces_griseosporeus	8163924	12	0	0			0
RefSeq_simulated	1911	Streptomyces_griseus	8328034	4889	609	0.124565	95.3924	17.3645	1.03774
RefSeq_simulated	1912	Streptomyces_hygroscopicus	9682870	40484	22094	0.545746	98.4459	37.9224	26.134
RefSeq_simulated	1914	Streptomyces_lavendulae	8932792	208	3	0.0144231	94.8889	11.6667	0.0050712
RefSeq_simulated	1915	Streptomyces_lincolnensis	10319054	105	0	0			0
RefSeq_simulated	1916	Streptomyces_lividans	8318010	5	3	0.6	100	24.3333	0.00544601
RefSeq_simulated	1919	Streptomyces_microflavus	8452583	103	2	0.0194175	96.3333	24	0.00357287
RefSeq_simulated	1920	Streptomyces_nigrescens	9534571	154	1	0.00649351	94.6667	8	0.00158371
RefSeq_simulated	1921	Streptomyces_olivaceoviridis	9763431	45	1	0.0222222	96	23	0.00154659
RefSeq_simulated	1922	Streptomyces_plicatus	8368647	2	0	0			0
RefSeq_simulated	1923	Streptomyces_phaeochromogenes	11713170	26	0	0			0
RefSeq_simulated	1924	Streptomyces_purpurascens	9188115	14	0	0			0
RefSeq_simulated	1927	Streptomyces_rimosus	9643891	166302	105814	0.636276	97.9621	35.4032	57.0149
RefSeq_simulated	1928	Streptomyces_rochei	8181137	176	0	0			0
RefSeq_simulated	1930	Streptomyces_scabiei	10148695	3561	2137	0.600112	99.3752	40.7211	2.96257
RefSeq_simulated	1932	Streptomyces_tendae	8887909	155	6	0.0387097	96.6667	31.8333	0.0101936
RefSeq_simulated	1933	Streptoalloteichus_tenebrarius	7099767	5	0	0			0
RefSeq_simulated	1935	Streptomyces_violaceoruber	8629698	169	0	0			0
RefSeq_simulated	1938	Streptomyces_viridochromogenes	7827744	604	18	0.0298013	94.536	10.8889	0.0348121
RefSeq_simulated	1940	Streptomyces_albireticuli	8564494	102	5	0.0490196	95.8667	23.8	0.00609493
RefSeq_simulated	1941	Streptomyces_badius	7515187	2	1	0.5	96	23	0.00200926
RefSeq_simulated	1942	Streptomyces_goshikiensis	8161592	4	1	0.25	93.3333	3	0.00185013
RefSeq_simulated	1943	Streptomyces_griseoruber	10217879	112	4	0.0357143	93.3333	3	0.00156588
RefSeq_simulated	1944	Streptomyces_halstedii	7849026	76	0	0			0
RefSeq_simulated	1945	Streptomyces_jumonjinensis	8465075	52	0	0			0
RefSeq_simulated	1946	Streptomyces_kasugaensis	9262443	100	0	0			0
RefSeq_simulated	1950	Streptomyces_peucetius	9528656	140	117	0.835714	97.9601	35.1624	0.0498601
RefSeq_simulated	1951	Streptomyces_purpureus	7458334	85	1	0.0117647	96	23	0.00202458
RefSeq_simulated	1952	Streptomyces_thermoviolaceus	6066002	12	0	0			0
RefSeq_simulated	1954	Streptomyces_brasiliensis	10696112	118	0	0			0
RefSeq_simulated	1956	Streptomyces_diastaticus	6982337	144	26	0.180556	96.9487	29.1154	0.0303194
RefSeq_simulated	1960	Streptomyces_vinaceus	7673509	140	3	0.0214286	96.4444	22.6667	0.00590343
RefSeq_simulated	1961	Streptomyces_virginiae	8588732	42	0	0			0
RefSeq_simulated	1963	Streptomyces_olivochromogenes	11669312	41	0	0			0
RefSeq_simulated	1967	Streptomyces_kanamyceticus	10133897	132	0	0			0
RefSeq_simulated	1968	Streptomyces_cellulosae	10063079	84	0	0			0
RefSeq_simulated	1969	Streptomyces_chartreusis	9912098	63	0	0			0
RefSeq_simulated	1970	Streptomyces_morookaense	7418596	11	5	0.454545	94.9333	16	0.00853261
RefSeq_simulated	1971	Streptomyces_noursei	9857535	141	3	0.0212766	94.2222	6.33333	0.00459547
RefSeq_simulated	1990	Actinomadura_atramentaria	6710579	34	1	0.0294118	93.3333	3	0.00225018
RefSeq_simulated	1992	Thermomonospora_echinospora	8649739	3	0	0			0
RefSeq_simulated	1993	Actinomadura_madurae	10255144	18321	9354	0.510562	99.9795	41.8906	12.8663
RefSeq_simulated	1997	Microtetraspora_fusca	9024887	84	32	0.380952	96.3162	25.8125	0.0535408
RefSeq_simulated	1999	Planomonospora_venezuelensis	8185542	9	0	0			0
RefSeq_simulated	2001	Streptosporangium_roseum	10369518	6	0	0			0
RefSeq_simulated	2002	Streptosporangium_amethystogenes	10087134	3	0	0			0
RefSeq_simulated	2006	Thermobispora_bispora	4189976	5	0	0			0
RefSeq_simulated	2014	Nocardiopsis_dassonvillei	6541269	2774	1897	0.68385	99.4137	40.0053	4.1646
RefSeq_simulated	2017	Streptoalloteichus_hindustanus	7279383	4	0	0			0
RefSeq_simulated	2020	Thermomonospora_curvata	5639016	12	0	0			0
RefSeq_simulated	2021	Thermobifida_fusca	3642249	3	0	0			0
RefSeq_simulated	2024	Thermoactinomyces_intermedius	2756565	31	18	0.580645	97.1506	29.2222	0.0853599
RefSeq_simulated	2026	Thermoactinomyces_vulgaris	2638027	776	636	0.819588	99.8669	41.2909	3.23018
RefSeq_simulated	2030	Kibdelosporangium_aridum	12276125	6	0	0			0
RefSeq_simulated	2033	Microbacterium_testaceum	3590404	91252	2110	0.0231228	95.0271	14.5659	5.62249
RefSeq_simulated	2035	Curtobacterium_flaccumfaciens	3745652	1496	450	0.300802	96.0834	22.7222	1.78364
RefSeq_simulated	2036	Curtobacterium_citreum	3612036	1123	862	0.767587	100	41.8445	3.46281
RefSeq_simulated	2045	Pimelobacter_simplex	5637360	11	0	0			0
RefSeq_simulated	2047	Rothia_dentocariosa	2506025	63915	35596	0.556927	97.2487	30.8526	71.1149
RefSeq_simulated	2051	Mobiluncus_curtisii	2146480	3	0	0			0
RefSeq_simulated	2052	Mobiluncus_mulieris	2481783	33079	15865	0.479609	99.574	40.6354	61.3131
RefSeq_simulated	2054	Gordonia_bronchialis	5290012	1	0	0			0
RefSeq_simulated	2057	Sphaerobacter_thermophilus	3993764	999	494	0.494494	100	41.5688	1.85191
RefSeq_simulated	2061	Tsukamurella_paurometabola	4479724	83	8	0.0963855	95.2566	19.375	0.0116971
RefSeq_simulated	2064	Kitasatospora_griseola	8578408	9	0	0			0
RefSeq_simulated	2065	Kitasatospora_phosalacinea	7620895	16	0	0			0
RefSeq_simulated	2072	Saccharothrix_australiensis	7861373	37	0	0			0
RefSeq_simulated	2074	Pseudonocardia_autotrophica	7535285	9	0	0			0
RefSeq_simulated	2078	Sporolactobacillus_inulinus	3139478	142	61	0.429577	97.8183	33.2623	0.207965
RefSeq_simulated	2094	Mycoplasmopsis_arginini	678592	3152	1422	0.451142	98.6873	38.5077	26.7043
RefSeq_simulated	2095	Mycoplasma_capricolum	1010023	19555	9062	0.463411	98.4104	37.4857	67.0254
RefSeq_simulated	2096	Mycoplasma_gallisepticum	981408	83412	39611	0.474884	98.9585	37.7785	97.6422
RefSeq_simulated	2097	Mycoplasma_genitalium	580076	39433	19656	0.498466	99.8929	41.6711	99.2892
RefSeq_simulated	2098	Metamycoplasma_hominis	715165	120988	56966	0.47084	98.5085	37.2501	96.4239
RefSeq_simulated	2099	Mesomycoplasma_hyopneumoniae	897405	16169	7799	0.482343	99.0183	38.8979	71.4306
RefSeq_simulated	2100	Mesomycoplasma_hyorhinis	838863	17254	8877	0.514489	99.8225	40.9005	79.0867
RefSeq_simulated	2102	Mycoplasma_mycoides	1035494	28236	10090	0.357345	97.5563	33.1491	57.9789
RefSeq_simulated	2104	Mycoplasma_pneumoniae	823017	130666	65027	0.497658	99.8331	40.5533	99.6521
RefSeq_simulated	2105	Mycoplasma_leachii	1008951	2095	1108	0.528878	99.0733	38.3682	14.1788
RefSeq_simulated	2107	Mycoplasmopsis_pulmonis	962791	3246	1712	0.527418	100	39.5572	23.4496
RefSeq_simulated	2109	Mycoplasmopsis_synoviae	846495	93756	48007	0.512042	99.4861	38.8828	98.5898
RefSeq_simulated	2110	Mycoplasmopsis_agalactiae	877438	2389	226	0.0946003	96.0982	24.7301	0.353757
RefSeq_simulated	2112	Mycoplasmopsis_bovigenitalium	841512	3479	1764	0.507042	100	39.5737	26.9772
RefSeq_simulated	2113	Mycoplasmopsis_californica	793841	7614	3872	0.508537	100	40.9633	52.1153
RefSeq_simulated	2114	Entomoplasma_ellychniae	900037	514	298	0.579767	100	38.4295	4.87902
RefSeq_simulated	2115	Mycoplasmopsis_fermentans	1118751	8320	4148	0.498558	99.6753	38.074	41.7588
RefSeq_simulated	2116	Malacoplasma_iowae	1278574	4069	2019	0.496191	99.5098	40.9842	20.9311
RefSeq_simulated	2120	Mesomycoplasma_neurolyticum	1040908	8	0	0			0
RefSeq_simulated	2121	Metamycoplasma_orale	806218	12	3	0.25	95.5556	2.33333	0.0382031
RefSeq_simulated	2123	Mycoplasma_putrefaciens	832598	6315	2887	0.457165	99.4709	40.5133	40.1242
RefSeq_simulated	2124	Metamycoplasma_salivarium	728347	8	3	0.375	100	4.33333	0.0453081
RefSeq_simulated	2127	Mesomycoplasma_collis	902877	3	0	0			0
RefSeq_simulated	2128	Mesomycoplasma_flocculare	778866	26	8	0.307692	98.0877	29	0.140075
RefSeq_simulated	2130	Ureaplasma_urealyticum	881828	122666	62289	0.507794	99.7977	40.7855	97.5555
RefSeq_simulated	2133	Spiroplasma_citri	1640878	646	349	0.540248	98.6974	39	2.34088
RefSeq_simulated	2134	Spiroplasma_melliferum	1297943	18579	11384	0.612735	99.8746	40.1897	66.8126
RefSeq_simulated	2137	Spiroplasma_apis	1160554	2	0	0			0
RefSeq_simulated	2138	Spiroplasma_poulsonii	1966068	20037	9310	0.46464	99.0142	25.4028	40.0913
RefSeq_simulated	2139	Spiroplasma_clarkii	1560007	4	0	0			0
RefSeq_simulated	2143	Spiroplasma_gladiatoris	1164642	4	0	0			0
RefSeq_simulated	2144	Spiroplasma_mirum	1160484	10	10	1	99.6671	42	0.130204
RefSeq_simulated	2145	Spiroplasma_taiwanense	1086278	1	0	0			0
RefSeq_simulated	2148	Acholeplasma_laidlawii	1496992	675	336	0.497778	99.9425	41.875	3.33956
RefSeq_simulated	2149	Mesoplasma_entomophilum	847967	71	24	0.338028	97	28.7083	0.380557
RefSeq_simulated	2150	Haploplasma_modicum	1219180	1	0	0			0
RefSeq_simulated	2151	Mesoplasma_florum	793224	9964	4873	0.489061	99.4907	40.8323	57.7416
RefSeq_simulated	2161	Methanobacterium_bryantii	3466370	1	1	1	94.6667	8	0.00435614
RefSeq_simulated	2162	Methanobacterium_formicicum	2494510	1764	888	0.503401	100	41.4876	5.24384
RefSeq_simulated	2173	Methanobrevibacter_smithii	1853160	54880	17230	0.313958	96.5602	25.2497	52.3846
RefSeq_simulated	2176	Methanohalophilus_mahii	2012424	2	0	0			0
RefSeq_simulated	2177	Methanohalophilus_halophilus	2022959	7	2	0.285714	96.3333	31.5	0.0121604
RefSeq_simulated	2186	Methanothermococcus_thermolithotrophicus	1706496	2	2	1	100	42	0.0176971
RefSeq_simulated	2187	Methanococcus_vannielii	1720048	2	1	0.5	96	23	0.00877882
RefSeq_simulated	2189	Methanotorris_igneus	1854197	9	4	0.444444	98.1667	36.5	0.0325208
RefSeq_simulated	2198	Methanoculleus_marisnigri	2478101	4	0	0			0
RefSeq_simulated	2200	Methanoculleus_thermophilus	2223235	95	48	0.505263	100	42	0.326011
RefSeq_simulated	2208	Methanosarcina_barkeri	4574907	4527	3317	0.732715	99.6465	39.3144	9.36325
RefSeq_simulated	2209	Methanosarcina_mazei	4142816	940268	488388	0.519414	99.3042	39.4973	93.9179
RefSeq_simulated	2210	Methanosarcina_thermophila	3127379	1005	426	0.423881	99.9609	40.9343	2.04603
RefSeq_simulated	2214	Methanosarcina_acetivorans	5751492	431	22	0.0510441	93.7576	5.27273	0.014518
RefSeq_simulated	2215	Methanosarcina_vacuolata	4563885	1929	1272	0.659409	99.955	40.8137	4.11211
RefSeq_simulated	2226	Methanococcoides_methylutens	2508511	594	308	0.518519	100	41.5357	1.83822
RefSeq_simulated	2234	Archaeoglobus_fulgidus	2178400	7517	3764	0.500732	100	41.7035	23.0011
RefSeq_simulated	2238	Haloarcula_marismortui	4274642	5	5	1	100	42	0.00587184
RefSeq_simulated	2242	Halobacterium_salinarum	2429680	577	395	0.684575	100	40.5038	2.37978
RefSeq_simulated	2246	Haloferax_volcanii	4012900	6675	4871	0.729738	100	41.1735	16.2966
RefSeq_simulated	2247	Halorubrum_lacusprofundi	3692576	15901	8050	0.506257	99.9753	40.8258	27.6209
RefSeq_simulated	2248	Halorubrum_saccharovorum	3423703	75915	10168	0.133939	95.2524	16.3542	19.2539
RefSeq_simulated	2252	Haloferax_mediterranei	3907473	2	0	0			0
RefSeq_simulated	2261	Pyrococcus_furiosus	1889914	119	59	0.495798	100	42	0.462825
RefSeq_simulated	2265	Thermococcus_litoralis	2215172	724	384	0.530387	99.8526	41.1641	2.58612
RefSeq_simulated	2269	Thermofilum_pendens	1813393	1	0	0			0
RefSeq_simulated	2275	Desulfurococcus_mucosus	1314639	854	411	0.481265	99.9239	41.9343	4.5557
RefSeq_simulated	2283	Acidianus_ambivalens	2252027	4	1	0.25	98.6667	42	0.00670507
RefSeq_simulated	2285	Sulfolobus_acidocaldarius	2225959	87503	43765	0.500154	99.9974	41.9419	94.7198
RefSeq_simulated	2286	Saccharolobus_shibatae	2916875	1203	581	0.482959	97.606	33.0224	0.655153
RefSeq_simulated	2287	Saccharolobus_solfataricus	2658139	501798	243726	0.485705	99.9711	39.0023	95.9296
RefSeq_simulated	2290	Desulfobacter_curvatus	5644283	1	0	0			0
RefSeq_simulated	2291	Desulfobacter_hydrogenophilus	5157696	2915	1461	0.501201	99.9995	41.371	4.19699
RefSeq_simulated	2296	Desulforapulum_autotrophicum	5657782	3714	1859	0.500539	100	40.5105	4.82896
RefSeq_simulated	2298	Desulfocicer_vacuolatum	5035799	772	386	0.5	100	41.6036	1.14951
RefSeq_simulated	2303	Thermoplasma_acidophilum	1564906	1	0	0			0
RefSeq_simulated	2317	Methanosphaera_stadtmanae	1767403	673	482	0.716196	99.5357	40.2925	3.9738
RefSeq_simulated	2325	Thermoanaerobacter_kivui	2397824	55	21	0.381818	97.2419	29	0.110809
RefSeq_simulated	2331	Halanaerobium_praevalens	2309262	1997	1020	0.510766	99.9889	40.5157	6.42565
RefSeq_simulated	2337	Thermotoga_neapolitana	1884562	5764	4054	0.703331	100	41.682	23.7682
RefSeq_simulated	2340	Solemya_velum_gill_symbiont	2629178	411835	192770	0.468076	99.8731	41.8659	99.3006
RefSeq_simulated	2350	Haliscomenobacter_hydrossis	8771651	1	0	0			0
RefSeq_simulated	2352	Flexistipes_sinusarabici	2526590	2498	1250	0.5004	100	37.6776	7.18138
RefSeq_simulated	2355	unidentified_bacterial_endosymbiont	1661850	37	0	0			0
RefSeq_simulated	2371	Xylella_fastidiosa	2600197	3251976	1308338	0.402321	97.9476	34.3974	99.444
RefSeq_simulated	2374	Acetonema_longum	4323011	6	0	0			0
RefSeq_simulated	2377	Sporomusa_termitida	5316008	2	1	0.5	96	23	0.00282167
RefSeq_simulated	2382	Acetitomaculum_ruminis	3082721	897	450	0.501672	100	41.8867	2.18476
RefSeq_simulated	2421	Thermosipho_africanus	2016657	1588	764	0.481108	98.8835	38.2435	5.54467
RefSeq_simulated	2426	Teredinibacter_turnerae	5348823	18295	8303	0.45384	99.2359	39.6578	20.7165
RefSeq_simulated	2434	Roseobacter_denitrificans	4308791	3002	1507	0.501999	100	41.7186	5.1177
RefSeq_simulated	2702	Gardnerella_vaginalis	1667406	604667	253046	0.418488	98.4992	36.735	98.5975
RefSeq_simulated	2718	Cardiobacterium_hominis	2670755	26113	9802	0.375369	98.148	35.2331	39.2857
RefSeq_simulated	2734	Symbiobacterium_thermophilum	3566135	115	57	0.495652	100	41.2807	0.241354
RefSeq_simulated	2736	Verrucomicrobium_spinosum	8220857	3	0	0			0
RefSeq_simulated	2738	Vagococcus_fluvialis	2651514	16	9	0.5625	97.1852	33.1111	0.0207806
RefSeq_simulated	2739	Vagococcus_salmoninarum	3104446	95	0	0			0
RefSeq_simulated	2741	Peptococcus_niger	1968473	4	1	0.25	93.3333	3	0.00762012
RefSeq_simulated	2743	Marinobacter_nauticus	3989480	5	0	0			0
RefSeq_simulated	2746	Halomonas_elongata	4061825	19	5	0.263158	96.2667	26	0.0126052
RefSeq_simulated	2748	Carnobacterium_divergens	2629627	523350	234191	0.447484	99.3159	40.778	96.2173
RefSeq_simulated	2749	Carnobacterium_gallinarum	4041428	121	41	0.338843	96.5041	15.8049	0.0500566
RefSeq_simulated	2750	Carnobacterium_mobile	2632867	1888	915	0.48464	100	39.5661	5.12024
RefSeq_simulated	2751	Carnobacterium_maltaromaticum	3502975	505699	219748	0.434543	99.1339	40.1803	91.8781
RefSeq_simulated	2752	Carnobacterium_funditum	2352439	1	0	0			0
RefSeq_simulated	2754	Synergistes_jonesii	2741240	6807	3404	0.500073	99.9938	41.2656	17.0676
RefSeq_simulated	2756	Brochothrix_thermosphacta	2578375	1407392	635775	0.45174	99.2943	40.7739	96.2935
RefSeq_simulated	2757	Brochothrix_campestris	2324176	17	1	0.0588235	94.6667	8	0.00649693
RefSeq_simulated	12917	Acidovorax_facilis	6424669	5	1	0.2	99.3333	42	0.00235032
RefSeq_simulated	13076	Globicatella_sanguinis	2622382	6	4	0.666667	99.6667	42	0.0149864
RefSeq_simulated	13160	Brevundimonas_bullata	3484100	16	0	0			0
RefSeq_simulated	13264	Brachyspira_innocens	3281611	369	24	0.0650407	94.5298	11.3333	0.0575632
RefSeq_simulated	13276	Suttonella_indologenes	2507163	10	5	0.5	99.0667	42	0.0134415
RefSeq_simulated	13373	Burkholderia_mallei	5834748	16564	11542	0.696812	99.2285	40.2441	4.31643
RefSeq_simulated	13688	Novosphingobium_capsulatum	4836455	1	0	0			0
RefSeq_simulated	13689	Sphingomonas_paucimobilis	4367078	2629	380	0.144542	99.2895	39.4868	1.06201
RefSeq_simulated	13690	Sphingobium_yanoikuyae	5532633	1464579	371280	0.253506	97.2528	30.603	82.8131
RefSeq_simulated	13769	Natrialba_magadii	4443643	15	1	0.0666667	97.3333	40	0.00339811
RefSeq_simulated	13773	Pyrobaculum_aerophilum	2222430	48792	18033	0.369589	98.6687	38.904	64.2782
RefSeq_simulated	28025	Bifidobacterium_animalis	1938483	1392677	553957	0.397764	98.2525	35.5607	98.0667
RefSeq_simulated	28026	Bifidobacterium_pseudocatenulatum	2313752	391277	226554	0.579012	98.9026	38.3697	93.1093
RefSeq_simulated	28028	Corynebacterium_flavescens	2758653	467	236	0.505353	100	40.5551	1.2857
RefSeq_simulated	28031	Lysinibacillus_fusiformis	4843789	50627	20543	0.405772	96.9186	28.6449	43.6851
RefSeq_simulated	28034	Sulfobacillus_thermosulfidooxidans	3861015	22215	9792	0.440783	99.3405	38.4268	30.9007
RefSeq_simulated	28035	Staphylococcus_lugdunensis	2571829	11527	8903	0.772361	99.3149	40.092	29.8023
RefSeq_simulated	28037	Streptococcus_mitis	1906344	180241	58718	0.325775	96.1406	22.8946	68.9039
RefSeq_simulated	28038	Latilactobacillus_curvatus	1916521	490939	214748	0.437423	99.2112	39.7823	97.4848
RefSeq_simulated	28042	Saccharopolyspora_rectivirgula	3961468	546	273	0.5	100	42	1.03616
RefSeq_simulated	28044	Streptomyces_longisporoflavus	9802249	49	0	0			0
RefSeq_simulated	28045	Mycobacterium_celatum	4720680	71	9	0.126761	96	23.1111	0.0111848
RefSeq_simulated	28047	Mycolicibacterium_confluentis	5876557	55	0	0			0
RefSeq_simulated	28049	Acidothermus_cellulolyticus	2443540	3731	1868	0.50067	100	41.9497	10.8952
RefSeq_simulated	28051	Lachnospira_multipara	2871860	33	0	0			0
RefSeq_simulated	28052	Lachnospira_pectinoschiza	2704308	289	0	0			0
RefSeq_simulated	28068	Rubrivivax_gelatinosus	5075359	553	229	0.414105	96.13	23.1965	0.628428
RefSeq_simulated	28072	Nostoc_sp._PCC_7524	6718869	7	0	0			0
RefSeq_simulated	28077	Nitrospirillum_amazonense	6874351	5	0	0			0
RefSeq_simulated	28080	Campylobacter_upsaliensis	1628950	33642	13967	0.415166	98.8006	38.2924	68.0616
RefSeq_simulated	28082	Legionella_anisa	4362280	49564	24405	0.492394	99.9379	41.3977	55.7074
RefSeq_simulated	28083	Legionella_birminghamensis	3789238	349	164	0.469914	99.9593	41.7012	0.647017
RefSeq_simulated	28084	Legionella_cherrii	3696762	16816	8344	0.496194	99.9439	41.8755	28.9382
RefSeq_simulated	28085	Legionella_cincinnatiensis	4098995	2581	1299	0.503293	99.9949	41.7344	4.68368
RefSeq_simulated	28087	Legionella_sainthelensi	4597280	40855	18666	0.456884	99.0048	39.7803	42.9622
RefSeq_simulated	28088	Legionella_wadsworthii	3602617	82	50	0.609756	96.4917	26.12	0.0636482
RefSeq_simulated	28090	Acinetobacter_lwoffii	3528101	277919	115760	0.416524	97.0725	28.3941	41.8833
RefSeq_simulated	28091	Neisseria_weaveri	2238481	94373	47305	0.501256	99.5756	40.4425	92.973
RefSeq_simulated	28092	Robbsia_andropogonis	6828120	5	0	0			0
RefSeq_simulated	28094	Trinickia_caryophylli	6589281	84	0	0			0
RefSeq_simulated	28095	Burkholderia_gladioli	8201484	1137983	662934	0.582552	98.8191	39.1402	95.0945
RefSeq_simulated	28097	Ralstonia_syzygii	5521407	71	19	0.267606	94.826	14.2105	0.0373456
RefSeq_simulated	28099	Agrobacterium_rubi	5293384	2	2	1	100	42	0.00570524
RefSeq_simulated	28101	Phyllobacterium_myrsinacearum	5424106	10369	4938	0.476227	98.7868	39.4575	12.7759
RefSeq_simulated	28104	Mesorhizobium_huakuii	7212699	221	129	0.58371	96.3881	24.5194	0.100697
RefSeq_simulated	28107	Pseudoalteromonas_espejiana	4500451	43	1	0.0232558	96.6667	24	0.00335522
RefSeq_simulated	28108	Alteromonas_macleodii	4867393	530243	291273	0.54932	98.1512	36.5799	87.6746
RefSeq_simulated	28109	Pseudoalteromonas_nigrifaciens	4274777	7	5	0.714286	97.8667	34.6	0.0176617
RefSeq_simulated	28110	Francisella_philomiragia	2017543	886	142	0.160271	95.7238	20.4507	0.278755
RefSeq_simulated	28111	Bacteroides_eggerthii	4206509	385688	216982	0.562584	99.362	40.9345	82.2075
RefSeq_simulated	28112	Tannerella_forsythia	3405521	267013	122496	0.458764	99.22	39.1632	91.9268
RefSeq_simulated	28113	Bacteroides_heparinolyticus	3608975	27287	10086	0.369627	98.6965	38.2529	31.7296
RefSeq_simulated	28114	Porphyromonas_levii	2261978	9069	3713	0.409417	99.5098	40.9461	21.3666
RefSeq_simulated	28115	Porphyromonas_macacae	2214526	131382	55948	0.425842	98.4146	37.4034	92.6045
RefSeq_simulated	28116	Bacteroides_ovatus	6472489	984277	329061	0.334317	98.0243	35.028	67.4365
RefSeq_simulated	28117	Alistipes_putredinis	2550678	461	116	0.251627	98.3411	37.431	0.034383
RefSeq_simulated	28118	Odoribacter_splanchnicus	4392177	504343	204002	0.404491	99.5199	40.7728	92.7515
RefSeq_simulated	28119	Bacteroides_zoogleoformans	3361794	454	23	0.0506608	94.9798	11.9565	0.0515201
RefSeq_simulated	28123	Porphyromonas_asaccharolytica	2186370	1	0	0			0
RefSeq_simulated	28124	Porphyromonas_endodontalis	2102930	4593	2314	0.50381	99.9971	41.7105	15.2546
RefSeq_simulated	28125	Prevotella_bivia	2521238	58149	26393	0.453886	99.4072	40.8961	70.8926
RefSeq_simulated	28126	Prevotella_buccae	3284105	14655	8678	0.592153	98.9216	40.211	31.3526
RefSeq_simulated	28127	Prevotella_buccalis	3307707	164	43	0.262195	95.542	13.9535	0.0798741
RefSeq_simulated	28128	Prevotella_corporis	2800206	185	84	0.454054	98.8499	26.1071	0.0939217
RefSeq_simulated	28129	Prevotella_denticola	3106544	858021	389332	0.453756	98.5827	38.7459	82.6112
RefSeq_simulated	28130	Prevotella_disiens	3051352	243842	102690	0.421133	99.1665	39.7688	71.2577
RefSeq_simulated	28131	Prevotella_intermedia	2674170	579919	235586	0.406239	97.656	32.5265	96.0111
RefSeq_simulated	28132	Prevotella_melaninogenica	3168282	418	21	0.0502392	97.5238	25.619	0.0460502
RefSeq_simulated	28133	Prevotella_nigrescens	2887107	1059	274	0.258735	96.7713	26.9964	0.378545
RefSeq_simulated	28134	Prevotella_oralis	2839537	6	2	0.333333	97.6667	40	0.0106355
RefSeq_simulated	28135	Prevotella_oris	3168212	88	5	0.0568182	96.4	26.8	0.0148664
RefSeq_simulated	28136	Prevotella_oulorum	2805893	76955	31872	0.414164	97.9428	35.6619	69.8908
RefSeq_simulated	28137	Prevotella_veroralis	2990547	124	1	0.00806452	96	23	0.00504924
RefSeq_simulated	28141	Cronobacter_sakazakii	4437993	2144558	1385674	0.646135	98.8549	38.5973	97.6515
RefSeq_simulated	28151	Serratia_proteamaculans	5525200	15517	7876	0.507572	97.6565	34.4811	17.8182
RefSeq_simulated	28152	Yersinia_kristensenii	4733508	452906	217369	0.479943	98.5513	38.0645	92.1865
RefSeq_simulated	28161	Conservatibacter_flavescens	2607477	32	0	0			0
RefSeq_simulated	28169	Vibrio_pelagius	4963975	1296	259	0.199846	95.1892	17.722	0.037752
RefSeq_simulated	28171	Vibrio_aestuarianus	4144461	481	18	0.037422	96.6667	26.1667	0.0298229
RefSeq_simulated	28172	Vibrio_metschnikovii	3831334	402	20	0.0497512	95.3333	17.5	0.0173569
RefSeq_simulated	28173	Vibrio_nigripulchritudo	6389377	951787	449640	0.472417	97.5666	33.063	89.7956
RefSeq_simulated	28174	Vibrio_ordalii	3894846	975	868	0.890256	98.6954	39.5749	0.437193
RefSeq_simulated	28175	Vibrio_orientalis	4698244	104	19	0.182692	96.2807	27	0.0093652
RefSeq_simulated	28182	Leptospira_noguchii	4710917	614421	233990	0.38083	98.1008	34.5469	95.5567
RefSeq_simulated	28183	Leptospira_santarosai	3983611	912861	511579	0.560413	99.075	39.3547	99.8273
RefSeq_simulated	28184	Leptospira_weilii	4381393	465321	272520	0.58566	99.1263	39.0165	94.2466
RefSeq_simulated	28187	Acetohalobium_arabaticum	2469596	2279	1142	0.501097	100	40.3433	6.80913
RefSeq_simulated	28188	Capnocytophaga_canimorsus	2414275	136953	61965	0.452454	98.671	37.7934	92.7495
RefSeq_simulated	28189	Capnocytophaga_cynodegmi	2640475	77608	33980	0.437841	97.8684	34.3596	79.264
RefSeq_simulated	28197	Aliarcobacter_butzleri	2341251	181776	82636	0.454603	98.2405	36.8622	92.1264
RefSeq_simulated	28198	Aliarcobacter_cryaerophilus	2108340	928251	248334	0.267529	96.2013	23.232	79.0703
RefSeq_simulated	28199	Arcobacter_nitrofigilis	3192235	5127	2640	0.514921	100	41.433	11.7003
RefSeq_simulated	28200	Aliarcobacter_skirrowii	1969846	420225	202629	0.482192	98.985	39.5251	96.4899
RefSeq_simulated	28212	Sphingomonas_adhaesiva	3760237	64	18	0.28125	96.0022	26.5	0.00904198
RefSeq_simulated	28213	Sphingomonas_parapaucimobilis	3994522	8	2	0.25	96	21.5	0.00756035
RefSeq_simulated	28220	Brachymonas_denitrificans	2712870	1	0	0			0
RefSeq_simulated	28223	Desulfobacula_toluolica	5197905	2	0	0			0
RefSeq_simulated	28224	Mesoplasma_seiffertii	977957	83	0	0			0
RefSeq_simulated	28227	Malacoplasma_penetrans	1358633	638	326	0.510972	100	41.1626	3.56586
RefSeq_simulated	28229	Colwellia_psychrerythraea	5373180	1	0	0			0
RefSeq_simulated	28234	Geotoga_petraea	2150220	10699	5067	0.473596	99.8231	41.3314	29.7117
RefSeq_simulated	28237	Petrotoga_miotherma	2107090	12825	8530	0.665107	99.9932	41.644	34.0041
RefSeq_simulated	28251	Ornithobacterium_rhinotracheale	2399175	45	0	0			0
RefSeq_simulated	28258	Cobetia_marina	4176400	11	4	0.363636	99	41.5	0.0144622
RefSeq_simulated	28264	Arcanobacterium_haemolyticum	1988850	932	471	0.505365	99.6079	40.8493	3.50263
RefSeq_simulated	28442	Haloarcula_vallismortis	3896637	5	2	0.4	96.6667	31.5	0.00775027
RefSeq_simulated	28444	Herbidospora_cretacea	8282092	19886	10188	0.51232	100	41.8197	16.9893
RefSeq_simulated	28445	Mycobacterium_intermedium	6885661	141	0	0			0
RefSeq_simulated	28446	Anaerotignum_propionicum	3120417	2	0	0			0
RefSeq_simulated	28447	Clavibacter_michiganensis	3377556	150435	81355	0.540798	99.627	41.0323	94.6797
RefSeq_simulated	28448	Komagataeibacter_xylinus	3727795	5470	2816	0.514808	99.9732	40.0181	10.6844
RefSeq_simulated	28449	Neisseria_subflava	2195659	121	34	0.280992	96.5686	24.3824	0.0863978
RefSeq_simulated	28450	Burkholderia_pseudomallei	7081111	1452906	1035111	0.712442	99.4699	40.74	95.3305
RefSeq_simulated	28452	Leptospira_alstonii	4436408	10018	1025	0.102316	98.5215	34.84	2.81789
RefSeq_simulated	28454	Sphingobacterium_multivorum	5965850	15	5	0.333333	96.4	27	0.00864923
RefSeq_simulated	28887	Planobispora_longispora	8845392	8	0	0			0
RefSeq_simulated	28893	Streptomyces_pilosus	7585172	25	1	0.04	95.3333	23	0.00199073
RefSeq_simulated	28894	Streptomyces_nitrosporeus	7581562	141	0	0			0
RefSeq_simulated	28896	Thermoanaerobacterium_saccharolyticum	2837411	20	3	0.15	95.3333	11	0.01593
RefSeq_simulated	28898	Campylobacter_helveticus	1871495	86654	40878	0.471738	99.6291	40.3007	92.0018
RefSeq_simulated	28901	Salmonella_enterica	4951383	426069	317148	0.744358	98.6704	38.9849	84.4706
RefSeq_simulated	28903	Mycoplasmopsis_bovis	1003404	1816149	833832	0.459121	98.8371	38.1146	95.9228
RefSeq_simulated	29283	Halorubrum_distributum	3306135	6778	4925	0.726616	99.9943	41.9121	18.4182
RefSeq_simulated	29284	Halorubrum_trapanicum	3080988	8264	1149	0.139037	95.228	16.3499	5.03089
RefSeq_simulated	29291	Methanococcoides_burtonii	2575032	620	313	0.504839	100	39.6102	1.82736
RefSeq_simulated	29292	Pyrococcus_abyssi	1768562	1244	623	0.500804	100	41.9791	5.21989
RefSeq_simulated	29299	Nocardioides_plantarum	4681321	22	0	0			0
RefSeq_simulated	29303	Streptomyces_cattleya	8092553	2748	1367	0.497453	99.9937	41.5669	2.42359
RefSeq_simulated	29305	Streptomyces_griseoincarnatus	7707382	4	1	0.25	94	3	0.00195916
RefSeq_simulated	29306	Streptomyces_griseoluteus	6664735	6	1	0.166667	94.6667	8	0.00226566
RefSeq_simulated	29311	Mycobacterium_haemophilum	4235765	146669	66787	0.455359	99.4202	40.7623	86.2342
RefSeq_simulated	29313	Mycobacterium_shimoidei	4842631	169909	85374	0.502469	99.9999	41.5736	91.333
RefSeq_simulated	29314	Mycolicibacter_hiberniae	4396654	4356	2270	0.52112	99.9994	41.707	7.49597
RefSeq_simulated	29316	Schaalia_hyovaginalis	2346665	4	0	0			0
RefSeq_simulated	29321	Corynebacterium_otitidis	2118285	6994	3228	0.461538	99.1985	39.7602	20.2303
RefSeq_simulated	29322	#NAME?	3331935	1	0	0			0
RefSeq_simulated	29323	Thermoanaerobacter_brockii	2344824	1	1	1	99.3333	42	0.00639707
RefSeq_simulated	29324	Caldicellulosiruptor_naganoensis	2494610	9	0	0			0
RefSeq_simulated	29329	Thermoanaerobacterium_xylanolyticum	2534358	6	0	0			0
RefSeq_simulated	29332	Domibacillus_aminovorans	3731130	1172701	588251	0.501621	99.9935	41.7998	99.2938
RefSeq_simulated	29341	Clostridium_argentinense	4803058	441	80	0.181406	95.7032	20.775	0.0411196
RefSeq_simulated	29344	Caloramator_fervidus	1763241	3276	1656	0.505495	100	41.7313	13.2384
RefSeq_simulated	29347	#NAME?	3658040	153	34	0.222222	96.6785	27.1176	0.051585
RefSeq_simulated	29348	#NAME?	2528470	68413	29113	0.425548	99.1341	37.8331	79.1996
RefSeq_simulated	29350	Thermoanaerobacter_thermocopriae	2455744	165	32	0.193939	96.7308	25.8438	0.179009
RefSeq_simulated	29354	Lacrimispora_celerecrescens	5272838	7757	3981	0.513214	99.9918	41.6544	10.8024
RefSeq_simulated	29355	Ruminiclostridium_cellobioparum	6132222	2	0	0			0
RefSeq_simulated	29357	Clostridium_collagenovorans	3482404	393	0	0			0
RefSeq_simulated	29358	Paeniclostridium_ghonii	3657532	1521	299	0.196581	95.5828	18.6455	0.357673
RefSeq_simulated	29359	Asaccharospora_irregularis	2622699	56	11	0.196429	95.8182	21.8182	0.0148702
RefSeq_simulated	29360	Cellulosilyticum_lentocellum	4714237	1627	976	0.599877	100	40.8402	3.07685
RefSeq_simulated	29362	Ruminiclostridium_papyrosolvens	5027861	3264	1638	0.501838	99.9935	40.9866	4.79954
RefSeq_simulated	29363	Clostridium_paraputrificum	3561289	117829	53480	0.453878	98.8505	37.2551	82.5397
RefSeq_simulated	29364	#NAME?	3458343	4	0	0			0
RefSeq_simulated	29365	Hathewaya_proteolytica	2818024	2	0	0			0
RefSeq_simulated	29367	Clostridium_puniceum	6082167	1188	26	0.0218855	95.0601	15.3846	0.0447702
RefSeq_simulated	29369	Clostridium_sardiniense	3942322	639	10	0.0156495	95	13.1	0.0282575
RefSeq_simulated	29370	Lacrimispora_sphenoides	5309474	34	4	0.117647	97.5	33	0.0113571
RefSeq_simulated	29372	Clostridium_thermobutyricum	3505620	547	0	0			0
RefSeq_simulated	29373	Clostridium_thermopalmarium	2819317	188	52	0.276596	99.9359	41.5962	0.278436
RefSeq_simulated	29376	Desulfofundulus_thermobenzoicus	3716015	22	4	0.181818	97.6667	37.25	0.00855755
RefSeq_simulated	29378	Staphylococcus_arlettae	2706864	196577	123071	0.62607	99.0322	39.3375	68.869
RefSeq_simulated	29379	Staphylococcus_auricularis	2216575	1434	0	0			0
RefSeq_simulated	29380	Staphylococcus_caprae	2598513	1939	67	0.0345539	97.715	28.4328	0.0770056
RefSeq_simulated	29382	Staphylococcus_cohnii	2694244	272129	154808	0.568877	99.2304	38.9388	92.5549
RefSeq_simulated	29384	Staphylococcus_kloosii	2639038	4777	1203	0.251832	99.7271	40.7323	6.5345
RefSeq_simulated	29385	Staphylococcus_saprophyticus	2577899	77205	53702	0.695577	99.4399	41.0065	67.0471
RefSeq_simulated	29388	Staphylococcus_capitis	2497742	721741	485305	0.672409	98.8376	39.5311	96.2678
RefSeq_simulated	29389	Streptococcus_alactolyticus	1832198	228	2	0.00877193	99.3333	42	0.0164284
RefSeq_simulated	29391	Gemella_morbillorum	1760930	7629	3380	0.443046	98.9016	38.6544	24.3055
RefSeq_simulated	29394	Dolosigranulum_pigrum	1862135	493843	205710	0.416549	98.1891	36.215	97.4445
RefSeq_simulated	29396	Saccharococcus_thermophilus	3145141	19	4	0.210526	92.1667	4.25	0.0104924
RefSeq_simulated	29405	Microlunatus_phosphovorus	5683123	3	0	0			0
RefSeq_simulated	29408	Rhodoplanes_elegans	6538588	12	1	0.0833333	96.6667	24	0.00230937
RefSeq_simulated	29409	Rhodoplanes_roseus	6879536	11	0	0			0
RefSeq_simulated	29419	Helicobacter_canis	1930063	6	1	0.166667	94.6667	8	0.00782358
RefSeq_simulated	29422	Legionella_brunensis	3750738	7	1	0.142857	96	23	0.00402587
RefSeq_simulated	29423	Legionella_oakridgensis	2668211	370	158	0.427027	99.7522	41.3924	0.888835
RefSeq_simulated	29427	Methylorubrum_rhodesianum	5873985	19	10	0.526316	98.6	37.2	0.0186756
RefSeq_simulated	29428	Methylorubrum_rhodinum	5406054	24	7	0.291667	95.4286	17.7143	0.0176284
RefSeq_simulated	29429	Methylorubrum_zatmanii	5389031	47	6	0.12766	96.3333	20.3333	0.0154944
RefSeq_simulated	29430	Acinetobacter_haemolyticus	3441166	232001	120655	0.520062	98.6096	37.6644	83.5868
RefSeq_simulated	29432	Psychrobacter_phenylpyruvicus	3275513	6254	3153	0.504157	99.9996	41.7266	13.4609
RefSeq_simulated	29433	Moraxella_ovis	2306095	26	9	0.346154	96.8889	32.7778	0.0458784
RefSeq_simulated	29435	Pseudomonas_flavescens	5849540	1755	903	0.51453	100	41.8738	2.30579
RefSeq_simulated	29438	Pseudomonas_savastanoi	5999881	3677	1865	0.507207	97.4582	32.2901	0.922318
RefSeq_simulated	29442	Pseudomonas_tolaasii	6792797	4295	2131	0.496158	99.9212	41.0924	4.55852
RefSeq_simulated	29443	Paucimonas_lemoignei	4215120	1	0	0			0
RefSeq_simulated	29446	Xanthomonas_sp.	5069976	261	32	0.122605	94.5846	11.8125	0.0610062
RefSeq_simulated	29447	Xanthomonas_albilineans	3756117	368167	172049	0.467312	98.8244	38.3912	94.3627
RefSeq_simulated	29448	Bradyrhizobium_elkanii	9518205	125735	85163	0.677321	99.9429	41.4114	49.471
RefSeq_simulated	29449	Rhizobium_etli	6530228	48111	26110	0.542703	99.9044	41.4523	43.9743
RefSeq_simulated	29459	Brucella_melitensis	3294931	254	225	0.885827	99.7645	40.8222	0.307017
RefSeq_simulated	29460	Brucella_neotomae	3329628	223	207	0.928251	99.6908	41.8213	0.280512
RefSeq_simulated	29461	Brucella_suis	3315175	94	94	1	99.4997	41.7872	0.142225
RefSeq_simulated	29466	Veillonella_parvula	2132142	211602	81461	0.384973	96.9219	28.5837	69.5103
RefSeq_simulated	29471	Pectobacterium_atrosepticum	5024250	270476	140778	0.520482	99.7011	40.9534	94.4855
RefSeq_simulated	29483	Yersinia_aldovae	4471090	90644	39791	0.438981	98.6327	38.5964	68.3658
RefSeq_simulated	29484	Yersinia_frederiksenii	4941872	131460	30306	0.230534	95.43	17.6355	32.9512
RefSeq_simulated	29485	Yersinia_rohdei	4372253	104031	49744	0.478165	99.5591	41.5532	78.7296
RefSeq_simulated	29486	Yersinia_ruckeri	3894226	1268521	610244	0.481067	99.6074	40.7949	98.8495
RefSeq_simulated	29488	Photorhabdus_luminescens	5464970	19088	4581	0.239994	95.2601	16.4818	10.5166
RefSeq_simulated	29489	Aeromonas_enteropelogenes	4392400	1432	370	0.25838	95.3712	17.3973	0.103087
RefSeq_simulated	29494	Vibrio_furnissii	4993326	15124	8686	0.574319	98.5511	38.3423	22.3389
RefSeq_simulated	29495	Vibrio_navarrensis	4439391	1012	186	0.183794	97.3667	17.0968	0.36282
RefSeq_simulated	29497	Vibrio_splendidus	5449819	1386018	691923	0.499216	97.7049	33.6355	93.1548
RefSeq_simulated	29498	Vibrio_tubiashii	5540337	1824	803	0.440241	99.8838	41.3163	2.15637
RefSeq_simulated	29503	Desulfomicrobium_escambiense	3782107	2	0	0			0
RefSeq_simulated	29506	Leptospira_inadai	4457871	228	0	0			0
RefSeq_simulated	29507	Leptospira_kirschneri	4409424	1864206	1111510	0.596238	99.3171	40.1301	99.5754
RefSeq_simulated	29508	Leptospira_meyeri	4237206	178464	103528	0.580106	97.3216	31.6643	84.8386
RefSeq_simulated	29510	Turneriella_parva	4409302	35	17	0.485714	100	42	0.0582178
RefSeq_simulated	29511	Leptospira_wolbachii	4081981	1592	628	0.394472	99.6646	38.8312	2.18117
RefSeq_simulated	29518	Borreliella_afzelii	987652	41203	19151	0.464796	99.5384	40.7767	92.02
RefSeq_simulated	29519	Borreliella_garinii	905692	33763	12245	0.362675	97.8995	34.0673	81.0247
RefSeq_simulated	29520	Borrelia_crocidurae	920157	22	0	0			0
RefSeq_simulated	29522	Brachyspira_aalborgi	2609344	112	0	0			0
RefSeq_simulated	29524	Porphyromonas_circumdentaria	2033794	10	0	0			0
RefSeq_simulated	29529	Chitinophaga_arvensicola	8316369	2	2	1	98.6667	41	0.00363139
RefSeq_simulated	29533	Flavobacterium_pectinovorum	5610979	36	4	0.111111	94.5	13	0.010729
RefSeq_simulated	29534	Flavobacterium_saccharophilum	5209309	6206	3228	0.520142	99.9992	41.938	8.9857
RefSeq_simulated	29536	Flavobacterium_succinicans	3664904	712	396	0.55618	99.9848	41.8535	1.61177
RefSeq_simulated	29539	Thermoleophilum_album	2207191	1	0	0			0
RefSeq_simulated	29546	Lawsonia_intracellularis	1719192	866	436	0.503464	99.7892	41.211	3.76782
RefSeq_simulated	29549	Rhodothermus_marinus	3386737	13016	6489	0.49854	99.9721	41.5764	25.0298
RefSeq_simulated	29552	Haploplasma_axanthum	1883099	33033	16619	0.503103	99.9978	40.8448	71.5431
RefSeq_simulated	29553	Mycoplasmopsis_bovirhinis	922012	12878	5795	0.449992	99.4275	38.0305	59.1081
RefSeq_simulated	29554	Metamycoplasma_canadense	693241	1	0	0			0
RefSeq_simulated	29555	Mycoplasmopsis_canis	897443	19881	9261	0.465822	98.4885	37.6853	75.1633
RefSeq_simulated	29556	Mycoplasmopsis_gallinacea	1074838	115	23	0.2	96.8696	30.2174	0.122902
RefSeq_simulated	29557	Mycoplasmopsis_gallinarum	834674	5	0	0			0
RefSeq_simulated	29559	Metamycoplasma_hyosynoviae	889181	83698	36783	0.439473	98.9754	38.6387	92.7151
RefSeq_simulated	29560	Mycoplasma_imitans	922439	91	34	0.373626	97.4324	29.8824	0.378562
RefSeq_simulated	29561	Mycoplasmopsis_meleagridis	644173	6329	3195	0.504819	99.4757	40.856	52.4656
RefSeq_simulated	29562	Mesomycoplasma_ovipneumoniae	1081520	7955	2096	0.263482	95.8819	20.9136	23.4176
RefSeq_simulated	29563	Halanaerobium_salsuginis	2991186	7	0	0			0
RefSeq_simulated	29573	Halomonas_halophila	3563217	3	3	1	100	42	0.0127132
RefSeq_simulated	29575	Taylorella_equigenitalis	1704267	59009	28851	0.488925	99.7546	40.9477	90.5936
RefSeq_simulated	29581	Janthinobacterium_lividum	6373589	1604	917	0.571696	97.9382	35.8953	2.11912
RefSeq_simulated	31899	Caldicellulosiruptor_bescii	2931662	5723	3389	0.592172	99.9982	39.7153	15.9163
RefSeq_simulated	31909	Halothermothrix_orenii	2578146	1	0	0			0
RefSeq_simulated	31943	Brevibacterium_iodinum	3614741	4097	2373	0.579204	99.9989	41.7391	9.38643
RefSeq_simulated	31958	Amycolatopsis_orientalis	9490992	110	6	0.0545455	95.6667	22	0.00874513
RefSeq_simulated	31959	Amycolatopsis_lurida	9047228	18	10	0.555556	96.7333	27	0.015817
RefSeq_simulated	31962	Actinomadura_rifamycini	8385432	1	0	0			0
RefSeq_simulated	31971	Amedibacillus_dolichus	2191053	14162	6387	0.450996	99.3713	40.2776	34.1724
RefSeq_simulated	31973	Eggerthia_catenaformis	1945158	1704	850	0.498826	99.9537	40.7047	6.35316
RefSeq_simulated	31998	Methylobacterium_radiotolerans	6899110	6122	4495	0.734237	99.9262	41.0854	8.95626
RefSeq_simulated	32002	Achromobacter_denitrificans	6736870	163658	81094	0.495509	99.7077	41.5259	82.8199
RefSeq_simulated	32040	Acidovorax_konjaci	5077528	39	8	0.205128	97.5	32.375	0.0203052
RefSeq_simulated	32046	Synechococcus_elongatus	2749599	11137	4726	0.424351	99.1025	39.8474	22.6422
RefSeq_simulated	32056	Dulcicalothrix_desertica	11416284	1	0	0			0
RefSeq_simulated	32062	Deinococcus_radiophilus	2827165	1	0	0			0
RefSeq_simulated	33007	Winkia_neuii	2270293	313	151	0.482428	99.9823	42	1.00432
RefSeq_simulated	33008	Rhodococcus_globerulus	6739623	3	0	0			0
RefSeq_simulated	33010	Cutibacterium_avidum	2526138	546993	222758	0.407241	98.5229	37.2192	95.6475
RefSeq_simulated	33011	Cutibacterium_granulosum	2179712	1367	557	0.407462	98.0567	35.8043	3.76233
RefSeq_simulated	33018	Sporolactobacillus_laevolacticus	3590176	3	0	0			0
RefSeq_simulated	33025	Phascolarctobacterium_faecium	2454371	3414	1742	0.510252	99.9897	41.4346	10.0842
RefSeq_simulated	33028	Staphylococcus_saccharolyticus	2346516	7115	517	0.0726634	95.0548	14.6673	0.349923
RefSeq_simulated	33029	Anaerococcus_hydrogenalis	1908330	5302	2259	0.426066	98.2726	36.0279	15.8128
RefSeq_simulated	33030	Peptoniphilus_indolicus	2247968	35	12	0.342857	97.6667	32.9167	0.0512018
RefSeq_simulated	33031	Peptoniphilus_lacrimalis	1883562	34	12	0.352941	96.7778	24.9167	0.0902545
RefSeq_simulated	33032	Anaerococcus_lactolyticus	1936866	71	1	0.0140845	98.0132	40	0.00784773
RefSeq_simulated	33033	Parvimonas_micra	1677398	69980	33740	0.482138	99.3212	39.2166	92.1032
RefSeq_simulated	33034	Anaerococcus_prevotii	1998633	28	14	0.5	97.7619	29.9286	0.0513351
RefSeq_simulated	33035	Blautia_producta	6197116	4893	1969	0.402412	98.5034	38.4789	4.61629
RefSeq_simulated	33036	Anaerococcus_tetradius	1725895	86	0	0			0
RefSeq_simulated	33037	Anaerococcus_vaginalis	1893964	133	35	0.263158	96.2095	24.4286	0.117003
RefSeq_simulated	33038	#NAME?	3549191	565705	241800	0.427431	99.4702	40.4675	89.7623
RefSeq_simulated	33039	#NAME?	2979783	348	36	0.103448	98.6117	27.8056	0.0753075
RefSeq_simulated	33040	Streptococcus_milleri	1943143	619	284	0.458805	97.8112	32.6021	0.552455
RefSeq_simulated	33043	Coprococcus_eutactus	3112919	2916	600	0.205761	97.087	29.5883	2.68896
RefSeq_simulated	33044	Bartonella_doshiae	1844489	116	0	0			0
RefSeq_simulated	33045	Bartonella_grahamii	2369520	7035	3475	0.493959	99.8086	39.3206	19.8334
RefSeq_simulated	33046	Bartonella_taylorii	1948309	1629	741	0.45488	99.3725	40.0729	5.51961
RefSeq_simulated	33047	Bartonella_vinsonii	1995085	4856	1540	0.317133	96.1776	23.6136	10.4787
RefSeq_simulated	33049	Phaeovulum_veldkampii	3268293	7	2	0.285714	99.6667	42	0.00559925
RefSeq_simulated	33050	Sphingopyxis_macrogoltabida	5748623	29	1	0.0344828	93.3333	3	0.00262672
RefSeq_simulated	33051	Sphingomonas_sanguinis	4053092	60561	19127	0.31583	96.2098	23.9721	44.6094
RefSeq_simulated	33052	Sphingopyxis_terrae	3570894	10750	4849	0.45107	97.9114	34.1159	17.953
RefSeq_simulated	33053	Neisseria_perflava	2266113	288	14	0.0486111	96.1429	23.8571	0.0111204
RefSeq_simulated	33056	Candidatus_Kinetoplastibacterium_crithidii	821930	1	0	0			0
RefSeq_simulated	33059	Acidithiobacillus_caldus	3237599	604	308	0.509934	100	39.0487	1.42405
RefSeq_simulated	33060	Yersinia_mollaretii	4603534	94626	38778	0.409803	97.2564	31.1345	64.2841
RefSeq_simulated	33069	Pseudomonas_viridiflava	6093513	993524	600459	0.604373	97.5267	32.8547	94.6105
RefSeq_simulated	33074	Zymobacter_palmae	3028543	1340	670	0.5	99.999	41.8687	3.29617
RefSeq_simulated	33876	Catenuloplanes_japonicus	10971538	1358	679	0.5	100	41.9867	0.929286
RefSeq_simulated	33878	Agromyces_cerinus	4187509	7	0	0			0
RefSeq_simulated	33881	Curtobacterium_luteum	3620063	4740	430	0.0907173	95.4472	17.6977	1.71682
RefSeq_simulated	33883	Microbacterium_arborescens	3370341	75	14	0.186667	94.9048	13.2143	0.0627236
RefSeq_simulated	33884	Microbacterium_imperiale	3082772	1	0	0			0
RefSeq_simulated	33885	Microbacterium_lacticum	3086904	13	1	0.0769231	95.3333	23	0.00489163
RefSeq_simulated	33887	Rathayibacter_rathayi	3103889	275800	130205	0.472099	99.753	41.3492	99.1624
RefSeq_simulated	33888	Rathayibacter_tritici	3354681	18979	9024	0.475473	99.6313	41.1312	32.5086
RefSeq_simulated	33889	Brevibacterium_casei	3960094	38742	19828	0.511796	99.001	39.0889	45.2921
RefSeq_simulated	33895	Mycobacterium_interjectum	5929237	19	2	0.105263	96.3333	2	0.0050934
RefSeq_simulated	33897	Streptomyces_bluensis	9022007	16	0	0			0
RefSeq_simulated	33898	Streptomyces_galbus	7836436	48	0	0			0
RefSeq_simulated	33899	Streptomyces_galilaeus	9317583	77	0	0			0
RefSeq_simulated	33900	Streptomyces_murinus	8349858	1768	1121	0.63405	97.5107	33.5941	1.24725
RefSeq_simulated	33903	Streptomyces_avermitilis	9119895	328	219	0.667683	100	41.3744	0.348798
RefSeq_simulated	33904	Streptomyces_mashuensis	7237780	92	0	0			0
RefSeq_simulated	33905	Bifidobacterium_thermophilum	2316133	11635	6136	0.527374	99.7963	41.1066	32.5773
RefSeq_simulated	33906	Actinopolyspora_mortivallis	4233350	7	0	0			0
RefSeq_simulated	33910	Amycolatopsis_mediterranei	10236779	8913	4780	0.536295	99.994	41.8006	6.81214
RefSeq_simulated	33914	Saccharopolyspora_gregorii	6344421	3	0	0			0
RefSeq_simulated	33918	Microbacterium_liquefaciens	3712220	1	0	0			0
RefSeq_simulated	33919	Saccharothrix_coeruleofusca	7778610	24	0	0			0
RefSeq_simulated	33923	Mycoplasmopsis_felis	958349	12	0	0			0
RefSeq_simulated	33932	Sutcliffiella_cohnii	4899141	116	54	0.465517	100	41.2407	0.166437
RefSeq_simulated	33934	Anoxybacillus_flavithermus	2846746	133900	33882	0.25304	96.6669	27.0807	43.1343
RefSeq_simulated	33935	Lysinibacillus_macroides	4862621	152	32	0.210526	95.4387	17.3125	0.0645331
RefSeq_simulated	33936	Aeribacillus_pallidus	3903800	7457	4346	0.582808	99.1627	40.4179	15.0174
RefSeq_simulated	33938	Geobacillus_thermocatenulatus	3563800	6449	3726	0.577764	99.0927	39.2834	12.4406
RefSeq_simulated	33940	Geobacillus_thermodenitrificans	3505276	27633	16810	0.608331	99.3479	39.9764	38.0941
RefSeq_simulated	33941	Geobacillus_thermoleovorans	3499317	3613	1726	0.477719	98.5486	35.9687	6.28045
RefSeq_simulated	33942	Brevibacillus_thermoruber	4433503	6	0	0			0
RefSeq_simulated	33945	Enterococcus_avium	4537641	88330	49939	0.565369	98.8283	37.9311	59.2604
RefSeq_simulated	33946	Kurthia_gibsonii	2778614	24	4	0.166667	96.8333	28.25	0.0127762
RefSeq_simulated	33952	Acetobacterium_woodii	4044777	485	242	0.498969	99.9644	41.1281	0.901162
RefSeq_simulated	33954	Clostridium_magnum	6472246	584	0	0			0
RefSeq_simulated	33959	Lactobacillus_johnsonii	1951416	240233	103975	0.432809	98.2197	35.3194	90.3531
RefSeq_simulated	33960	Secundilactobacillus_collinoides	3616190	47094	23692	0.503079	99.8671	41.9275	61.5133
RefSeq_simulated	33962	Lentilactobacillus_kefiri	2489034	87889	44372	0.504864	99.9665	41.8507	87.2873
RefSeq_simulated	33964	Leuconostoc_citreum	1903250	193597	112725	0.582266	99.3485	41.0374	87.2305
RefSeq_simulated	33968	Leuconostoc_pseudomesenteroides	2114657	17927	4175	0.232889	96.0588	21.8086	8.18303
RefSeq_simulated	33970	Melissococcus_plutonius	2067831	38887	18927	0.486718	99.6105	40.7725	74.1962
RefSeq_simulated	33977	Caryophanon_latum	3590595	10	0	0			0
RefSeq_simulated	33984	Luteococcus_japonicus	3452849	3054	1408	0.461035	99.6062	40.218	5.96626
RefSeq_simulated	33989	Rickettsia_amblyommatis	1456213	21482	12665	0.589563	99.7495	41.2816	70.3333
RefSeq_simulated	33990	Rickettsia_bellii	1522076	17891	8871	0.495836	99.7403	40.6682	57.5072
RefSeq_simulated	33991	Rickettsia_montanensis	1279798	77	43	0.558442	97.5974	33.7674	0.402798
RefSeq_simulated	33992	Rickettsia_rhipicephali	1305467	66	36	0.545455	97.9579	36.3889	0.306787
RefSeq_simulated	33994	Neorickettsia_helminthoeca	884232	14	7	0.5	100	42	0.119539
RefSeq_simulated	33995	Komagataeibacter_europaeus	3797909	227590	102384	0.449862	98.7955	39.267	85.2981
RefSeq_simulated	33996	Gluconacetobacter_diazotrophicus	3914947	1	1	1	97.3333	40	0.00383147
RefSeq_simulated	33998	Acidocella_aminolytica	3964820	1345	674	0.501115	100	41.6588	2.54864
RefSeq_simulated	34002	Paracoccus_alcaliphilus	4772712	37	15	0.405405	99.7778	38.0667	0.0474573
RefSeq_simulated	34003	Paracoccus_aminophilus	4873118	7	0	0			0
RefSeq_simulated	34004	Paracoccus_aminovorans	4038130	411	170	0.413625	99.7965	40.0118	0.62997
RefSeq_simulated	34006	Paracoccus_thiocyanatus	3524418	170	50	0.294118	95.3488	17.44	0.178498
RefSeq_simulated	34007	Paracoccus_versutus	4969440	31922	14498	0.45417	98.6754	38.6955	31.1795
RefSeq_simulated	34010	Azospirillum_halopraeferens	6512377	5	0	0			0
RefSeq_simulated	34015	Blastomonas_natatoria	4045865	3	0	0			0
RefSeq_simulated	34017	Rhodobium_orientis	5189386	50	1	0.02	90.6667	8	0.00267854
RefSeq_simulated	34018	Rhodospirillum_centenum	4355543	2	0	0			0
RefSeq_simulated	34021	Candidatus_Liberibacter_asiaticus	1230251	1	0	0			0
RefSeq_simulated	34027	Aromatoleum_tolulyticum	5110391	1742	903	0.51837	100	41.9911	2.63723
RefSeq_simulated	34029	Leptothrix_cholodnii	4909403	3	0	0			0
RefSeq_simulated	34031	Desulfobacter_vibrioformis	4466775	1	0	0			0
RefSeq_simulated	34038	Rahnella_aquatilis	5448900	878	416	0.473804	99.6076	40.9038	1.1473
RefSeq_simulated	34059	Moraxella_atlantae	2501639	43	24	0.55814	99.8611	42	0.0433316
RefSeq_simulated	34060	Moraxella_caviae	2736043	102	0	0			0
RefSeq_simulated	34061	Moraxella_cuniculi	2202865	27286	13317	0.488052	99.8644	39.5259	59.8344
RefSeq_simulated	34062	Moraxella_osloensis	2649137	503286	182135	0.361892	96.7258	27.4867	84.6645
RefSeq_simulated	34071	Telluria_mixta	7444617	2	1	0.5	93.3333	3	0.00202831
RefSeq_simulated	34073	Variovorax_paradoxus	7079721	523	22	0.042065	94.8182	13.0455	0.0398038
RefSeq_simulated	34078	Scytonema_hofmannii	12294410	12749	6388	0.501059	99.9994	40.6498	7.55756
RefSeq_simulated	34085	Riemerella_anatipestifer	2155121	582323	252807	0.434135	99.1158	37.7497	99.5887
RefSeq_simulated	34087	Sphingobacterium_faecium	5296794	3	0	0			0
RefSeq_simulated	34095	Borreliella_japonica	1017684	2206	566	0.256573	94.7562	12.4682	2.4483
RefSeq_simulated	34103	Sphaerotilus_natans	4630083	4	0	0			0
RefSeq_simulated	34105	Streptobacillus_moniliformis	1673280	254948	122464	0.480349	99.8212	40.3784	98.7578
RefSeq_simulated	35519	Mogibacterium_timidum	1806210	18	6	0.333333	96.1395	24.8333	0.0308381
RefSeq_simulated	35554	Geobacter_sulfurreducens	3814128	24982	11464	0.45889	98.9381	37.7519	35.7433
RefSeq_simulated	35619	Streptomyces_griseoflavus	7580440	4160	0	0			0
RefSeq_simulated	35620	Streptomyces_hirsutus	8843894	68	0	0			0
RefSeq_simulated	35621	Streptomyces_mobaraensis	7668063	39	0	0			0
RefSeq_simulated	35622	Thermostaphylospora_chromogena	5988017	21486	10819	0.503537	100	40.684	23.907
RefSeq_simulated	35703	Citrobacter_amalonaticus	5071999	28471	18406	0.646482	99.0064	40.2629	31.8044
RefSeq_simulated	35743	Halorubrum_sodomense	3030553	90	15	0.166667	95.3801	16.6667	0.0530266
RefSeq_simulated	35745	Haloferax_denitrificans	3825973	8	3	0.375	94.2222	4.66667	0.0118401
RefSeq_simulated	35751	Sporichthya_polymorpha	5500153	79948	40169	0.502439	100	41.7743	66.8408
RefSeq_simulated	35752	Actinoplanes_philippinensis	10381230	12	0	0			0
RefSeq_simulated	35754	Dactylosporangium_aurantiacum	11523879	10	0	0			0
RefSeq_simulated	35755	Corynebacterium_kutscheri	2354065	3932	1928	0.490336	99.8503	41.2075	11.6527
RefSeq_simulated	35756	Corynebacterium_pilosum	2593653	756	378	0.5	100	41.6614	2.19544
RefSeq_simulated	35757	Corynebacterium_cystitidis	3011567	21	11	0.52381	100	38.2727	0.055154
RefSeq_simulated	35760	Bifidobacterium_choerinum	2257294	3132	1645	0.525223	99.9214	41.3337	10.416
RefSeq_simulated	35762	Planobispora_rosea	8559326	3	0	0			0
RefSeq_simulated	35765	Streptosporangium_pseudovulgare	8586701	6	0	0			0
RefSeq_simulated	35768	Mycoplasmopsis_felifaucium	764934	107	0	0			0
RefSeq_simulated	35773	Candidatus_Phytoplasma_luffae	769143	8	0	0			0
RefSeq_simulated	35786	Coprothermobacter_proteolyticus	1424912	5	0	0			0
RefSeq_simulated	35787	Limosilactobacillus_pontis	1714771	2082	970	0.465898	99.945	41.6062	8.10796
RefSeq_simulated	35788	Rickettsia_africae	1290917	46	29	0.630435	97.866	36.8621	0.235492
RefSeq_simulated	35789	Rickettsia_helvetica	1419877	33	14	0.424242	96.2068	23.4286	0.115221
RefSeq_simulated	35790	Rickettsia_japonica	1283087	737	594	0.80597	99.9596	41.3586	6.68661
RefSeq_simulated	35791	Rickettsia_massiliae	1376184	32	14	0.4375	97.8095	37.1429	0.129997
RefSeq_simulated	35792	Rickettsia_parkeri	1348030	49	26	0.530612	97.0015	30.0385	0.231449
RefSeq_simulated	35793	Rickettsia_sibirica	1250021	44	27	0.613636	97.2941	33.2222	0.256716
RefSeq_simulated	35794	Rickettsia_slovaca	1275089	6	2	0.333333	97.6667	33	0.0236846
RefSeq_simulated	35795	Ehrlichia_muris	1196717	722	386	0.534626	99.8023	39.5907	4.75476
RefSeq_simulated	35797	Nitrococcus_mobilis	3623681	1	0	0			0
RefSeq_simulated	35805	Rhodovulum_euryhalinum	3789126	8	0	0			0
RefSeq_simulated	35806	Rhodovulum_sulfidophilum	4347929	626	257	0.410543	98.089	36.7471	0.887641
RefSeq_simulated	35811	Erythrobacter_ramosus	3342622	5	0	0			0
RefSeq_simulated	35813	Roseococcus_thiosulfatophilus	4091248	1	0	0			0
RefSeq_simulated	35814	Bordetella_holmesii	3688120	2567	1300	0.506428	99.9928	40.5023	5.17399
RefSeq_simulated	35817	Helicobacter_heilmannii	1638988	30589	12530	0.409624	99.2129	39.1775	61.1637
RefSeq_simulated	35818	Helicobacter_pullorum	1733410	301745	127908	0.423894	98.645	39.0945	96.2592
RefSeq_simulated	35833	Bilophila_wadsworthia	4391194	28	0	0			0
RefSeq_simulated	35841	Caldibacillus_thermoamylovorans	3707071	114	8	0.0701754	97.1667	33.25	0.00453188
RefSeq_simulated	36744	Mycoplasma_simbae	852572	143	71	0.496503	100	41.4225	1.23075
RefSeq_simulated	36745	Clostridium_saccharoperbutylacetonicum	6666445	163479	101300	0.619651	99.9856	41.4969	78.4351
RefSeq_simulated	36746	Pseudomonas_cichorii	5984143	3434	1541	0.448748	99.0177	37.7307	3.26728
RefSeq_simulated	36805	Microbacterium_aurum	3424892	23687	12154	0.513108	99.9977	41.0927	40.9213
RefSeq_simulated	36806	Microbacterium_dextranolyticum	3181200	18	1	0.0555556	96.6667	24	0.0047152
RefSeq_simulated	36807	Microbacterium_laevaniformans	3031132	17	7	0.411765	96.8571	27.5714	0.0309455
RefSeq_simulated	36808	Corynebacterium_bovis	2666089	4	0	0			0
RefSeq_simulated	36809	Mycobacteroides_abscessus	5090491	3764723	1737767	0.461592	98.6178	37.8022	98.7298
RefSeq_simulated	36811	Mycolicibacterium_agri	7297392	8	1	0.125	100	42	0.00206923
RefSeq_simulated	36812	Mycobacterium_genavense	4936071	3260	1655	0.507669	100	41.6967	4.93413
RefSeq_simulated	36813	Mycolicibacterium_pulveris	5484749	68	24	0.352941	97.335	30.9167	0.0464196
RefSeq_simulated	36814	Mycolicibacterium_rhodesiae	6009003	57	0	0			0
RefSeq_simulated	36816	Streptomyces_caelestis	8936092	7	1	0.142857	96	23	0.00168978
RefSeq_simulated	36817	Streptomyces_pseudogriseolus	7363847	22	0	0			0
RefSeq_simulated	36818	Streptomyces_subrutilus	7604974	220	5	0.0227273	95.8667	19.6	0.00992771
RefSeq_simulated	36819	Amycolatopsis_azurea	9217912	37	12	0.324324	96.3926	26.25	0.0169236
RefSeq_simulated	36820	Gordonia_aichiensis	5092029	2	0	0			0
RefSeq_simulated	36821	Gordonia_amarae	5289363	25	0	0			0
RefSeq_simulated	36822	Gordonia_rubripertincta	5263177	11634	5113	0.439488	98.7982	38.6753	13.2777
RefSeq_simulated	36823	Gordonia_sputi	4952979	2	0	0			0
RefSeq_simulated	36832	Lacrimispora_aerotolerans	4732373	50071	25065	0.500589	100	41.9454	54.8268
RefSeq_simulated	36834	Clostridium_celatum	3639821	495	18	0.0363636	95.0015	14.2778	0.0592337
RefSeq_simulated	36839	Clostridium_felsineum	5242194	158	8	0.0506329	96.6667	29.75	0.0188089
RefSeq_simulated	36841	Terrisporobacter_glycolicus	4060596	38	2	0.0526316	94.0961	13	0.00748659
RefSeq_simulated	36842	Maledivibacter_halophilus	5802910	7	0	0			0
RefSeq_simulated	36844	Clostridium_homopropionicum	3644832	350	0	0			0
RefSeq_simulated	36845	Clostridium_intestinale	4686421	439	0	0			0
RefSeq_simulated	36847	Anaerotignum_neopropionicum	3194881	1	0	0			0
RefSeq_simulated	36849	Oxobacter_pfennigii	4510552	1	0	0			0
RefSeq_simulated	36854	Desulfitobacterium_dehalogenans	4321753	22	2	0.0909091	94.1212	24	0.00733499
RefSeq_simulated	36855	Brucella_canis	3312769	23	22	0.956522	99.5457	41.9091	0.0388497
RefSeq_simulated	36856	Sinorhizobium_saheli	5994348	64	6	0.09375	93.8889	7.16667	0.0126119
RefSeq_simulated	36861	Thiobacillus_denitrificans	3609948	1	0	0			0
RefSeq_simulated	36863	Ideonella_dechloratans	4544016	1	0	0			0
RefSeq_simulated	36873	Paraburkholderia_xenovorans	9731138	95	23	0.242105	96.1739	22.2174	0.0181993
RefSeq_simulated	36874	Porphyromonas_cangingivalis	2404857	11	1	0.0909091	93.3333	3	0.00627896
RefSeq_simulated	36875	Porphyromonas_canoris	2308674	1061	661	0.622997	98.4999	37.0061	4.17881
RefSeq_simulated	37326	Nocardia_brasiliensis	8935513	64	12	0.1875	97.3333	29.4167	0.0202786
RefSeq_simulated	37327	Nocardia_brevicatena	7007170	11	0	0			0
RefSeq_simulated	37328	Nocardia_carnea	7492940	935	474	0.506952	100	41.9937	0.945343
RefSeq_simulated	37329	Nocardia_farcinica	6292344	16327	9387	0.574937	99.0334	40.3048	19.6201
RefSeq_simulated	37330	Nocardia_nova	7959976	78405	47647	0.607704	99.1115	40.278	41.2721
RefSeq_simulated	37331	Pseudonocardia_petroleophila	6490139	8	0	0			0
RefSeq_simulated	37332	Nocardia_seriolae	8134318	938	469	0.5	99.9645	39.693	0.866944
RefSeq_simulated	37333	Nocardia_transvalensis	8398323	614	294	0.478827	99.9977	41.8776	0.528463
RefSeq_simulated	37372	Helicobacter_bilis	2559659	67	12	0.179104	96.7281	26	0.0445372
RefSeq_simulated	37480	Streptomyces_pluricolorescens	7332794	3	0	0			0
RefSeq_simulated	37487	Marichromatium_purpuratum	3779112	1144	582	0.508741	96.9312	29.8643	1.22103
RefSeq_simulated	37625	Desulfuromusa_kysingii	3744894	1	0	0			0
RefSeq_simulated	37633	Kineococcus_aurantiacus	5027298	5	0	0			0
RefSeq_simulated	37636	Thermus_scotoductus	2070699	302	44	0.145695	96.197	18.5227	0.132516
RefSeq_simulated	37637	Corynebacterium_pseudodiphtheriticum	2261008	112038	69104	0.616791	98.6505	38.3326	72.8594
RefSeq_simulated	37658	#NAME?	4222819	3	0	0			0
RefSeq_simulated	37659	Clostridium_algidicarnis	3060291	6846	3138	0.45837	99.8505	40.964	14.298
RefSeq_simulated	37734	Enterococcus_casseliflavus	3427276	649340	344483	0.530513	97.9776	34.7144	96.6899
RefSeq_simulated	37752	Flavobacterium_hibernum	5283672	15	0	0			0
RefSeq_simulated	37816	Rickettsia_honei	1268758	60	31	0.516667	97.025	31.6774	0.238028
RefSeq_simulated	37915	Dietzia_maris	4037770	5	0	0			0
RefSeq_simulated	37916	Mycolicibacterium_chlorophenolicum	7330216	14971	7887	0.526819	99.989	41.9082	14.9319
RefSeq_simulated	37919	Rhodococcus_opacus	9166298	17734	6776	0.382091	97.127	31.0211	10.0179
RefSeq_simulated	37921	Arthrobacter_agilis	3786308	1	0	0			0
RefSeq_simulated	37923	Rothia_kristinae	2377741	77081	37375	0.48488	99.4662	40.6247	84.96
RefSeq_simulated	37927	Sinomonas_atrocyanea	4492204	2	0	0			0
RefSeq_simulated	37928	Arthrobacter_crystallopoietes	5032705	7415	3738	0.504113	100	40.6017	10.6284
RefSeq_simulated	37930	Glutamicibacter_protophormiae	3933924	2	0	0			0
RefSeq_simulated	37931	Paenarthrobacter_ureafaciens	4724281	2	0	0			0
RefSeq_simulated	38027	Methanosarcina_siciliae	5017558	2253	722	0.320462	99.031	36.892	1.84652
RefSeq_simulated	38286	Corynebacterium_afermentans	2353801	10	0	0			0
RefSeq_simulated	38288	Corynebacterium_genitalium	2337040	3702	2663	0.719341	99.9947	41.534	14.1634
RefSeq_simulated	38289	Corynebacterium_jeikeium	2524840	265510	23517	0.0885729	95.7145	18.5064	20.1522
RefSeq_simulated	38290	Corynebacterium_macginleyi	2493537	13	1	0.0769231	96	23	0.00605566
RefSeq_simulated	38293	Photobacterium_damselae	4498533	1349790	582509	0.431555	98.6334	38.0952	93.8674
RefSeq_simulated	38300	Streptomyces_pristinaespiralis	8112061	1632	837	0.512868	99.9259	41.5771	1.53104
RefSeq_simulated	38301	Corynebacterium_minutissimum	2695970	79331	42509	0.535843	100	41.3948	89.1974
RefSeq_simulated	38302	Corynebacterium_mycetoides	2266470	6	0	0			0
RefSeq_simulated	38303	Corynebacterium_pseudogenitalium	2389603	3	0	0			0
RefSeq_simulated	38304	Corynebacterium_tuberculostearicum	2451854	11	0	0			0
RefSeq_simulated	38305	Corynebacterium_vitaeruminis	2931780	5	0	0			0
RefSeq_simulated	38307	Gluconobacter_cerinus	3467487	3361	1534	0.456412	97.2089	31.1982	6.35939
RefSeq_simulated	38308	Gluconobacter_frateurii	3309380	438	92	0.210046	96.8406	26.663	0.105307
RefSeq_simulated	38310	Rhodococcus_coprophilus	4579834	13	5	0.384615	95.7333	23	0.00517486
RefSeq_simulated	38311	Rhodococcus_marinonascens	4924407	8	0	0			0
RefSeq_simulated	38312	Rhodococcus_rhodnii	4491802	2	1	0.5	93.3333	3	0.00336168
RefSeq_simulated	38313	Shewanella_algae	4924764	138983	90329	0.649928	98.7911	38.6402	88.0938
RefSeq_simulated	38322	Pseudothermotoga_elfii	2169860	73	48	0.657534	100	41.7292	0.334031
RefSeq_simulated	38323	Bartonella_henselae	1946727	591837	288023	0.486659	99.5667	39.982	98.7571
RefSeq_simulated	38402	Erysipelothrix_tonsillarum	1931022	79	13	0.164557	95.3152	16.6154	0.0677879
RefSeq_simulated	38502	Blastococcus_aggregatus	4620309	8	0	0			0
RefSeq_simulated	38815	Desulfuromonas_acetexigens	3683125	1432	716	0.5	100	41.8142	2.90951
RefSeq_simulated	38875	Heyndrickxia_oleronia	5371064	85	7	0.0823529	96	21.7143	0.00653502
RefSeq_simulated	38986	Alteracholeplasma_palmae	1554229	2	0	0			0
RefSeq_simulated	39029	Megasphaera_cerevisiae	3152696	1372	686	0.5	100	41.4985	3.22546
RefSeq_simulated	39047	Mycoplasmopsis_sturni	813344	6	0	0			0
RefSeq_simulated	39122	Skermania_piniformis	4230116	12188	6087	0.499426	99.9999	41.7452	19.3721
RefSeq_simulated	39152	Methanococcus_maripaludis	1714918	20682	7391	0.357364	97.2688	30.0985	44.4601
RefSeq_simulated	39441	Methanobrevibacter_arboriphilus	2445031	16	3	0.1875	99.5556	1	0.0147646
RefSeq_simulated	39480	Andreesenia_angusta	2343503	16	0	0			0
RefSeq_simulated	39481	Clostridium_combesii	3892013	6996	4065	0.581046	98.1183	35.7919	2.64344
RefSeq_simulated	39482	Faecalicatena_contorta	5055003	208	7	0.0336538	97.619	33.4286	0.0182789
RefSeq_simulated	39483	Faecalitalea_cylindroides	1882013	6	0	0			0
RefSeq_simulated	39484	Agathobaculum_desmolans	2646896	19	7	0.368421	97.2381	28.7143	0.0123541
RefSeq_simulated	39485	Lachnospira_eligens	2831389	435863	137037	0.314404	97.8151	34.0121	71.9098
RefSeq_simulated	39486	Dorea_formicigenerans	3188304	389473	195599	0.502215	98.4781	37.9859	81.4918
RefSeq_simulated	39488	Anaerobutyricum_hallii	3455681	220	41	0.186364	97.7073	32.6829	0.0517119
RefSeq_simulated	39489	Clostridium_moniliforme	2605467	590	0	0			0
RefSeq_simulated	39490	Eubacterium_ramulus	3378009	123706	53891	0.435638	99.1483	40.2675	72.857
RefSeq_simulated	39493	Clostridium_tarantellae	3979886	1291	20	0.0154919	94.2755	5.75	0.0165331
RefSeq_simulated	39495	Eubacterium_uniforme	2872342	2220	1100	0.495495	100	41.71	5.61117
RefSeq_simulated	39496	Eubacterium_ventriosum	2761423	164106	75988	0.463042	99.5507	41.1457	91.8944
RefSeq_simulated	39645	Mesorhizobium_ciceri	6880454	26637	20199	0.758306	99.8049	41.2231	29.8565
RefSeq_simulated	39647	Paulownia_witches--broom_phytoplasma	891641	2	0	0			0
RefSeq_simulated	39650	Cellvibrio_mixtus	4773886	3	0	0			0
RefSeq_simulated	39664	Methanohalophilus_portucalensis	2084975	3145	1674	0.532273	100	41.6792	11.4056
RefSeq_simulated	39687	Mycolicibacterium_austroafricanum	6287627	27	0	0			0
RefSeq_simulated	39688	Mycolicibacterium_duvalii	5657388	11	0	0			0
RefSeq_simulated	39691	Mycolicibacterium_moriokaense	6225779	1884	925	0.490977	100	41.7416	2.22098
RefSeq_simulated	39692	Mycolicibacterium_parafortuitum	6044196	67	0	0			0
RefSeq_simulated	39694	Mycolicibacterium_poriferae	5929171	7	1	0.142857	98.6667	1	0.00252986
RefSeq_simulated	39768	Blattabacterium_sp._-Mastotermes_darwiniensis-	590336	255	1	0.00392157	94	3	0.0255787
RefSeq_simulated	39775	Methylomicrobium_album	4493444	2	0	0			0
RefSeq_simulated	39777	Veillonella_atypica	2071607	905805	424223	0.468338	97.713	33.8966	86.5711
RefSeq_simulated	39778	Veillonella_dispar	2116915	5624	1752	0.311522	96.9995	25.6792	9.60535
RefSeq_simulated	39791	Corynebacterium_glucuronolyticum	2866769	13113	7927	0.604515	99.3822	40.4584	32.464
RefSeq_simulated	39844	Mesorhizobium_tianshanense	7864668	14	2	0.142857	98	40	0.00240315
RefSeq_simulated	39950	Dialister_pneumosintes	1247407	1460	727	0.497945	100	41.3232	8.42628
RefSeq_simulated	39956	Methylobacterium_mesophilicum	5902708	46823	1319	0.0281699	94.7565	12.4738	2.82326
RefSeq_simulated	39960	Erythrobacter_litoralis	3251353	3550	1777	0.500563	100	41.121	7.87669
RefSeq_simulated	40091	Helcococcus_kunzii	2096464	87	3	0.0344828	95.7896	18.6667	0.0173149
RefSeq_simulated	40137	Afipia_carboxidovorans	3896074	1	0	0			0
RefSeq_simulated	40214	Acinetobacter_johnsonii	3540498	800008	380780	0.47597	96.9921	29.1609	90.4726
RefSeq_simulated	40215	Acinetobacter_junii	3438557	1177450	635103	0.539389	98.3637	37.782	88.9055
RefSeq_simulated	40216	Acinetobacter_radioresistens	3089777	167008	102017	0.610851	98.6922	38.6962	86.388
RefSeq_simulated	40269	Aliivibrio_salmonicida	4655660	179	13	0.0726257	96	10.2308	0.0157658
RefSeq_simulated	40318	Streptomyces_nodosus	7772587	19	6	0.315789	97.7778	35.3333	0.00676737
RefSeq_simulated	40324	Stenotrophomonas_maltophilia	5004261	1154366	677945	0.587288	98.32	36.9746	85.9294
RefSeq_simulated	40335	Legionella_tucsonensis	3357159	29082	14595	0.501857	99.9956	41.9728	48.0372
RefSeq_simulated	40373	Acinetobacter_sp._CIP-A165	3578179	65	24	0.369231	98.1111	34.4167	0.0255717
RefSeq_simulated	40414	Desulforhopalus_vacuolatus	3830687	1	0	0			0
RefSeq_simulated	40516	Gordonia_hydrophobica	4632341	1	0	0			0
RefSeq_simulated	40518	Ruminococcus_bromii	1849782	191251	67716	0.354069	97.2284	31.4098	74.0509
RefSeq_simulated	40520	Blautia_obeum	3649956	278770	147057	0.527521	99.1466	39.6521	84.0309
RefSeq_simulated	40542	Leptotrichia_buccalis	2465610	28	4	0.142857	96.5154	23.25	0.0245375
RefSeq_simulated	40543	Sneathia_sanguinegens	1259487	1	0	0			0
RefSeq_simulated	40545	Sutterella_wadsworthensis	3026517	8714	4372	0.501721	99.9988	41.6679	19.4628
RefSeq_simulated	40567	Actinosynnema_mirum	8248144	1	0	0			0
RefSeq_simulated	40571	Lentzea_albidocapillata	8639486	35	1	0.0285714	95.3333	23	0.00174779
RefSeq_simulated	40575	Clostridium_grantii	4474501	112	0	0			0
RefSeq_simulated	40576	Xenorhabdus_bovienii	4674198	197778	72416	0.366148	97.9279	35.6258	65.7447
RefSeq_simulated	40577	Xenorhabdus_poinarii	3659523	26	8	0.307692	96.4167	27	0.019866
RefSeq_simulated	40578	Xenorhabdus_beddingii	4096854	16	1	0.0625	95.3333	24	0.00358812
RefSeq_simulated	40682	Sphingomonas_mali	5228377	12	0	0			0
RefSeq_simulated	40683	Sphingomonas_pruni	4482342	3	0	0			0
RefSeq_simulated	40835	Borrelia_hispanica	1783846	7	1	0.142857	93.3333	3	0.00846486
RefSeq_simulated	40983	Geobacter_hydrogenophilus	4043428	2	0	0			0
RefSeq_simulated	40988	Saccharomonospora_azurea	4763852	41837	19997	0.477974	99.6344	41.3668	45.6514
RefSeq_simulated	40989	Saccharomonospora_cyanea	5408301	6	1	0.166667	98.6667	42	0.002792
RefSeq_simulated	40990	Saccharomonospora_glauca	4564108	91	45	0.494505	99.8519	41.1333	0.148879
RefSeq_simulated	41170	Exiguobacterium_acetylicum	3396606	18546	10521	0.567292	98.3172	34.9289	24.3589
RefSeq_simulated	41202	Ewingella_americana	4910581	25	0	0			0
RefSeq_simulated	41276	Brevundimonas_vesicularis	3345527	16399	9054	0.552107	99.9493	41.8052	32.4086
RefSeq_simulated	41673	Acidianus_brierleyi	2947244	94	42	0.446809	98.9206	26.2619	0.179761
RefSeq_simulated	41899	Burkholderia_plantarii	8081051	16990	7908	0.46545	99.757	40.1289	13.4455
RefSeq_simulated	41950	Candidatus_Microthrix_parvicella	4211496	16691	7322	0.43868	99.5979	41.3731	22.7473
RefSeq_simulated	41985	Agromyces_fucosus	4009498	14	8	0.571429	98.3333	37.25	0.0301035
RefSeq_simulated	41986	Agromyces_mediolanus	3861601	19	0	0			0
RefSeq_simulated	41997	Enterococcus_saccharolyticus	2622437	682	137	0.20088	99.9903	40.5401	0.787855
RefSeq_simulated	42092	Ureaplasma_canigenitalium	835388	16	0	0			0
RefSeq_simulated	42094	Ureaplasma_diversum	973501	6	0	0			0
RefSeq_simulated	42197	Actinosynnema_pretiosum	8131572	7	0	0			0
RefSeq_simulated	42233	Spirilliplanes_yamanashiensis	6544939	1	0	0			0
RefSeq_simulated	42234	Streptomyces_acidiscabies	11002003	6228	3287	0.527778	98.6106	38.4329	4.3813
RefSeq_simulated	42236	Streptomyces_diastatochromogenes	10520052	96	1	0.0104167	95.3333	23	0.00143535
RefSeq_simulated	42237	Streptomyces_eurythermus	9167999	1	0	0			0
RefSeq_simulated	42238	Streptomyces_neyagawaensis	9979945	62	0	0			0
RefSeq_simulated	42239	Streptomyces_sampsonii	7070328	2407	2198	0.91317	98.8628	40.3285	0.72049
RefSeq_simulated	42253	Nitrospira_moscoviensis	4589485	46	0	0			0
RefSeq_simulated	42422	Halobacteroides_halobius	2649255	15	0	0			0
RefSeq_simulated	42444	Marinovum_algicola	5396756	311	157	0.504823	100	41.4777	0.436577
RefSeq_simulated	42565	Halomonas_salina	3529351	4	3	0.75	98.6667	36	0.0128352
RefSeq_simulated	42566	Halomonas_eurihalina	3842566	33	8	0.242424	95.5	17.375	0.013923
RefSeq_simulated	42684	Streptomyces_collinus	8867154	118	0	0			0
RefSeq_simulated	42817	Corynebacterium_argentoratense	2031902	12525	6016	0.480319	99.1672	40.3939	35.4576
RefSeq_simulated	42858	Mammaliicoccus_lentus	2802382	79569	46985	0.590494	99.1706	40.6919	60.7201
RefSeq_simulated	42862	Rickettsia_felis	1579101	8391	4863	0.57955	99.8593	41.1328	36.17
RefSeq_simulated	42879	Methanococcus_aeolicus	1569500	2	0	0			0
RefSeq_simulated	42881	Streptomyces_chromofuscus	7483282	30	0	0			0
RefSeq_simulated	42906	Serratia_entomophila	5147822	2605	423	0.16238	95.2931	16.9764	0.212653
RefSeq_simulated	43057	Cereibacter_azotoformans	4442977	3627	1699	0.468431	98.8666	39.4026	5.35305
RefSeq_simulated	43064	Trichococcus_pasteurii	3234289	1033	551	0.533398	99.9734	40.8475	2.53073
RefSeq_simulated	43080	Sulfolobus_islandicus	2586647	489634	232784	0.475425	99.4486	40.6574	96.5036
RefSeq_simulated	43131	Tissierella_praeacuta	3206559	46	1	0.0217391	98.6667	42	0.0047091
RefSeq_simulated	43263	Pseudomonas_alcaligenes	4406305	70	1	0.0142857	94.6667	8	0.00340421
RefSeq_simulated	43304	Mycolicibacterium_peregrinum	7050152	342811	174180	0.508093	99.9541	41.8369	91.8256
RefSeq_simulated	43305	Butyrivibrio_proteoclasticus	4404886	17	3	0.176471	99.5556	42	0.00751438
RefSeq_simulated	43348	Mycobacterium_branderi	5979623	27	14	0.518519	99	37.9286	0.0187136
RefSeq_simulated	43354	Prauserella_rugosa	5279998	82	37	0.45122	99.964	39.9189	0.105814
RefSeq_simulated	43355	Crossiella_cryophila	10058141	2	0	0			0
RefSeq_simulated	43357	Kutzneria_albida	9874926	8	0	0			0
RefSeq_simulated	43595	Halanaerobium_saccharolyticum	2873865	534	44	0.082397	96.9242	30.0455	0.107938
RefSeq_simulated	43617	Mesorhizobium_mediterraneum	7256878	1	0	0			0
RefSeq_simulated	43654	Pseudoalteromonas_aurantia	5602374	74	6	0.0810811	98.2222	40.6667	0.00398046
RefSeq_simulated	43655	Pseudoalteromonas_citrea	5434598	212620	108595	0.510747	100	41.8478	91.891
RefSeq_simulated	43656	Pseudoalteromonas_denitrificans	6094166	21	0	0			0
RefSeq_simulated	43657	Pseudoalteromonas_luteoviolacea	6043625	5664	64	0.0112994	96.7733	18.4375	0.152243
RefSeq_simulated	43658	Pseudoalteromonas_rubra	6143755	22	0	0			0
RefSeq_simulated	43659	Pseudoalteromonas_tetraodonis	4128400	14	0	0			0
RefSeq_simulated	43660	Pseudoalteromonas_undina	4027610	22	1	0.0454545	95.3333	23	0.00374912
RefSeq_simulated	43661	Shewanella_benthica	4034511	19	0	0			0
RefSeq_simulated	43662	Pseudoalteromonas_piscicida	5380608	397	197	0.496222	97.1303	30.4924	0.547187
RefSeq_simulated	43663	Paenarthrobacter_aurescens	4355454	15	0	0			0
RefSeq_simulated	43670	Cellulomonas_cellasea	4734929	10	0	0			0
RefSeq_simulated	43671	Actinotalea_fermentans	3737518	16	0	0			0
RefSeq_simulated	43675	Rothia_mucilaginosa	2255158	136695	58479	0.427806	96.8046	28.5076	55.997
RefSeq_simulated	43677	Promicromonospora_citrea	5016341	13	0	0			0
RefSeq_simulated	43759	Streptomyces_wedmorensis	9380839	15	13	0.866667	100	42	0.0209256
RefSeq_simulated	43765	Corynebacterium_amycolatum	2474943	8397	4045	0.48172	96.1792	23.8153	15.7741
RefSeq_simulated	43767	Prescottella_equi	5438826	610962	416062	0.680995	98.994	40.2921	94.3196
RefSeq_simulated	43768	Corynebacterium_matruchotii	2855988	57935	26039	0.449452	98.1851	36.1252	71.5129
RefSeq_simulated	43769	Corynebacterium_propinquum	2480127	602858	263575	0.437209	98.688	37.3754	96.033
RefSeq_simulated	43770	Corynebacterium_striatum	2904831	208139	126627	0.608377	98.5974	37.3005	90.866
RefSeq_simulated	43771	Corynebacterium_urealyticum	2377532	80966	44079	0.544414	99.9829	41.2513	88.9117
RefSeq_simulated	43772	Rhodococcus_zopfii	6297215	38864	16546	0.425741	98.6749	39.3015	30.8257
RefSeq_simulated	43776	Haloarcula_argentinensis	4034304	3	1	0.333333	98	40	0.0037429
RefSeq_simulated	43928	Halobaculum_gomorrense	3208246	7	0	0			0
RefSeq_simulated	43948	Tolumonas_auensis	3471292	66	0	0			0
RefSeq_simulated	43992	Bradyrhizobium_liaoningense	7899289	752	62	0.0824468	94.6996	11.9677	0.0433204
RefSeq_simulated	43995	Johnsonella_ignava	2687075	19	3	0.157895	95.7778	15.6667	0.0168585
RefSeq_simulated	43997	Catonella_morbi	3479204	3272	1648	0.503667	100	41.6396	6.90014
RefSeq_simulated	44001	Caldicellulosiruptor_saccharolyticus	2970275	5	0	0			0
RefSeq_simulated	44007	Enterococcus_pseudoavium	2731874	824	49	0.059466	96.1769	24.7347	0.0666941
RefSeq_simulated	44008	Enterococcus_cecorum	2421598	1463474	568003	0.38812	98.2572	35.2324	96.0642
RefSeq_simulated	44009	Enterococcus_dispar	2822228	136	8	0.0588235	95.8333	23	0.030933
RefSeq_simulated	44010	Mycobacterium_conspicuum	6237139	249	5	0.0200803	93.7333	3	0.00254925
RefSeq_simulated	44012	Ferrimonas_balearica	4279159	4	0	0			0
RefSeq_simulated	44060	Streptomyces_megasporus	5850061	65	1	0.0153846	96.0265	23	0.00258117
RefSeq_simulated	44061	Streptomyces_thermodiastaticus	6105542	18	0	0			0
RefSeq_simulated	44250	Paenibacillus_alvei	6582090	139926	9023	0.0644841	95.66	19.2805	11.3433
RefSeq_simulated	44251	Paenibacillus_durus	6053498	4	0	0			0
RefSeq_simulated	44252	Paenibacillus_macerans	7390297	61416	31026	0.505178	99.9982	41.5437	46.6118
RefSeq_simulated	44255	Bradyrhizobium_oligotrophicum	8264165	26	0	0			0
RefSeq_simulated	44448	Borrelia_persica	1784977	11	0	0			0
RefSeq_simulated	44467	Mycobacterium_tilburgii	3238528	28	0	0			0
RefSeq_simulated	44470	Natronococcus_amylolyticus	4416525	1	0	0			0
RefSeq_simulated	44574	Nitrosomonas_communis	4067838	1	0	0			0
RefSeq_simulated	44576	Nitrosomonas_halophila	3211662	1	0	0			0
RefSeq_simulated	44577	Nitrosomonas_ureae	3307820	3	0	0			0
RefSeq_simulated	44674	Sulfurospirillum_barnesii	2510109	3	0	0			0
RefSeq_simulated	44752	Rhodococcus_wratislaviensis	9235301	18	9	0.5	97.342	32.8889	0.0133076
RefSeq_simulated	44753	Tsukamurella_spumae	4461018	14	0	0			0
RefSeq_simulated	44822	Microcystis_viridis	4697269	30	24	0.8	99.4722	41.1667	0.0547339
RefSeq_simulated	44823	Microcystis_wesenbergii	4683915	125	59	0.472	96.5204	26.0339	0.148081
RefSeq_simulated	44930	Natronobacterium_gregoryi	3788356	4438	2240	0.504732	100	41.0022	8.50828
RefSeq_simulated	44935	Halomonas_venusta	4437754	11	4	0.363636	94.3333	8	0.0111092
RefSeq_simulated	45056	Legionella_adelaidensis	2367659	131974	66058	0.500538	100	41.9876	98.024
RefSeq_simulated	45060	Legionella_donaldsonii	3606555	62	37	0.596774	96.9033	28.8649	0.0492159
RefSeq_simulated	45065	Legionella_geestiana	2666749	8000	3742	0.46775	99.7154	40.4294	19.0127
RefSeq_simulated	45066	Legionella_gratiana	3976384	8021	4031	0.502556	99.9998	41.8767	14.0097
RefSeq_simulated	45067	Legionella_lansingensis	2989256	17	8	0.470588	100	42	0.0404114
RefSeq_simulated	45068	Legionella_londiniensis	2452973	128	39	0.304688	100	42	0.240076
RefSeq_simulated	45070	Legionella_nautarum	3649429	1	0	0			0
RefSeq_simulated	45071	Legionella_parisiensis	4202140	176	85	0.482955	97.6549	30.3412	0.0866701
RefSeq_simulated	45072	Legionella_quateirensis	4281523	1652	841	0.50908	99.7575	40.5517	2.7738
RefSeq_simulated	45073	Legionella_quinlivanii	3546255	147	42	0.285714	99.3968	38.2857	0.167557
RefSeq_simulated	45074	Legionella_santicrucis	4820916	26	10	0.384615	96.0706	24.5	0.0228172
RefSeq_simulated	45075	Legionella_shakespearei	3507052	627	307	0.489633	99.9913	41.9511	1.30814
RefSeq_simulated	45076	Legionella_worsleiensis	3161811	2	0	0			0
RefSeq_simulated	45242	Capnocytophaga_granulosa	2843797	6	3	0.5	96.9167	7	0.0159294
RefSeq_simulated	45243	Capnocytophaga_haemolytica	2688499	9	0	0			0
RefSeq_simulated	45248	Leucothrix_mucor	5185674	1720	861	0.500581	100	41.5296	2.47196
RefSeq_simulated	45254	Dysgonomonas_capnocytophagoides	4784336	12622	5097	0.403819	98.8318	39.5321	14.5719
RefSeq_simulated	45361	Mesomycoplasma_conjunctivae	846214	1	0	0			0
RefSeq_simulated	45362	Mesomycoplasma_bovoculi	760240	4	0	0			0
RefSeq_simulated	45363	Metamycoplasma_alkalescens	821059	7792	4015	0.515272	99.7927	40.5843	49.361
RefSeq_simulated	45398	Streptomyces_griseoviridis	7872322	220	0	0			0
RefSeq_simulated	45462	Brevibacillus_borstelensis	5602664	388760	180983	0.465539	99.614	41.17	88.3739
RefSeq_simulated	45465	Vogesella_indigofera	3621567	1	0	0			0
RefSeq_simulated	45496	Methylophaga_sulfidovorans	3006884	24030	12099	0.503496	100	41.8935	45.5125
RefSeq_simulated	45497	Schnuerera_ultunensis	3216692	6334	3254	0.513735	99.9756	40.5317	14.2302
RefSeq_simulated	45498	Helicobacter_cholecystus	1420261	1123	564	0.502226	99.9882	41.4787	5.84125
RefSeq_simulated	45610	Psychrobacter_urativorans	3458123	1	0	0			0
RefSeq_simulated	45634	Streptococcus_cristatus	2000351	195898	75605	0.385941	97.0524	28.1669	91.8015
RefSeq_simulated	45656	Desulfonema_limicola	6908045	3	0	0			0
RefSeq_simulated	45658	Vibrio_scophthalmi	4856725	115402	54137	0.469117	99.2181	39.5203	74.7167
RefSeq_simulated	45668	Halobacillus_litoralis	4001992	2	0	0			0
RefSeq_simulated	45670	Salinicoccus_roseus	2557957	6411	2779	0.433474	98.0026	35.1382	14.8534
RefSeq_simulated	45677	Azohydromonas_lata	7784779	2	0	0			0
RefSeq_simulated	45851	Butyrivibrio_crossotus	2521323	32	17	0.53125	95.6078	21.1176	0.0340694
RefSeq_simulated	45972	Staphylococcus_pasteuri	2484808	11187	5750	0.513989	98.8251	38.7461	22.306
RefSeq_simulated	45979	Nocardia_pseudobrasiliensis	8407941	17	0	0			0
RefSeq_simulated	46124	Granulicatella_adiacens	1965420	69	3	0.0434783	93.3333	3	0.00844603
RefSeq_simulated	46125	Abiotrophia_defectiva	2046826	7	3	0.428571	98.6667	41.3333	0.0221318
RefSeq_simulated	46126	Staphylococcus_chromogenes	2394574	310474	181388	0.584229	98.3003	36.5755	92.5013
RefSeq_simulated	46127	Staphylococcus_felis	2479423	586673	275008	0.468759	99.3274	40.8279	96.6515
RefSeq_simulated	46158	Actinomadura_citrea	8992310	60	1	0.0166667	97.3333	40	0.00167921
RefSeq_simulated	46159	Actinomadura_coerulea	8190213	22	3	0.136364	95.1111	16.3333	0.00553099
RefSeq_simulated	46161	Actinomadura_kijaniata	10258935	34579	19853	0.574135	100	41.9281	25.1503
RefSeq_simulated	46163	Actinomadura_luteofluorescens	9468182	11	0	0			0
RefSeq_simulated	46164	Actinomadura_macra	9046351	10	0	0			0
RefSeq_simulated	46165	Actinomadura_verrucosospora	9018103	5	0	0			0
RefSeq_simulated	46171	Nonomuraea_africana	9694534	11	0	0			0
RefSeq_simulated	46172	Nonomuraea_angiospora	13093168	11	0	0			0
RefSeq_simulated	46175	Microtetraspora_niveoalba	8469978	27	4	0.148148	95.5	19.75	0.00713107
RefSeq_simulated	46176	Nonomuraea_polychroma	11519774	7	1	0.142857	97.3333	40	0.00131079
RefSeq_simulated	46177	Nonomuraea_pusilla	8992127	36	0	0			0
RefSeq_simulated	46180	Nonomuraea_rubra	12876814	2	1	0.5	96.6667	24	0.00117265
RefSeq_simulated	46182	Nonomuraea_spiralis	11470535	12	0	0			0
RefSeq_simulated	46206	Pseudobutyrivibrio_ruminis	3020378	4	0	0			0
RefSeq_simulated	46223	Thermoflavimicrobium_dichotomicum	3852792	1	0	0			0
RefSeq_simulated	46224	Heyndrickxia_sporothermodurans	3857089	13842	5909	0.426889	99.3588	39.6999	20.3906
RefSeq_simulated	46228	#NAME?	2733858	287302	138756	0.482962	99.7857	40.5486	97.108
RefSeq_simulated	46234	Anabaena_sp._90	5305675	41	29	0.707317	99.908	40.5172	0.0801783
RefSeq_simulated	46240	Paenibacillus_apiarius	6578323	27	7	0.259259	97.4286	33.7143	0.00811757
RefSeq_simulated	46256	Weissella_hellenica	1818703	243	94	0.386831	100	42	0.775003
RefSeq_simulated	46257	Pseudomonas_avellanae	5921932	1139	667	0.585601	97.6175	32.994	0.363699
RefSeq_simulated	46351	Mycolicibacterium_hassiacum	5269097	17	3	0.176471	98.4444	40.6667	0.00681331
RefSeq_simulated	46353	Agrococcus_jenensis	2962035	962	56	0.0582121	93.9768	5.14286	0.0838613
RefSeq_simulated	46354	Thermoanaerobacter_wiegelii	2785056	104	74	0.711538	97.9876	31.6892	0.358341
RefSeq_simulated	46429	Sphingobium_chlorophenolicum	4796122	78	15	0.192308	94.8	13.6667	0.0178478
RefSeq_simulated	46469	Orenia_marismortui	3459766	1	0	0			0
RefSeq_simulated	46503	Parabacteroides_merdae	4403124	412865	245261	0.594046	99.3058	40.1079	89.3009
RefSeq_simulated	46506	Bacteroides_stercoris	4009829	617392	297088	0.481198	99.0958	40.279	87.2874
RefSeq_simulated	46507	Ezakiella_coagulans	1806048	13667	6890	0.504134	99.9963	41.874	42.3761
RefSeq_simulated	46541	Thermosipho_melanesiensis	1915238	1	0	0			0
RefSeq_simulated	46609	Clostridium_pascui	3828744	456	0	0			0
RefSeq_simulated	46677	Pseudomonas_agarici	5502003	46426	23316	0.502219	99.9355	41.6842	47.0445
RefSeq_simulated	46678	Pseudomonas_caricapapayae	6257670	392	138	0.352041	97.841	33.5652	0.172764
RefSeq_simulated	46679	Pseudomonas_mucidolens	5853060	131	3	0.0229008	94.4444	11.3333	0.00427127
RefSeq_simulated	46680	Pseudomonas_nitroreducens	6229472	29796	21016	0.70533	99.0047	39.9771	30.5265
RefSeq_simulated	46867	Clostridium_chauvoei	2889569	608	74	0.121711	99.8108	38.1351	0.38151
RefSeq_simulated	46914	Devosia_riboflavina	5052234	4	0	0			0
RefSeq_simulated	47158	Paucidesulfovibrio_gracilis	3179481	14	0	0			0
RefSeq_simulated	47303	Sulfuracidifex_metallicus	2212444	2	1	0.5	96	23	0.00682503
RefSeq_simulated	47311	Methanobrevibacter_cuticularis	2608702	1735	935	0.538905	100	41.0374	5.26062
RefSeq_simulated	47312	Tsukamurella_pulmonis	4773464	185226	94553	0.510474	99.9971	41.8271	92.1281
RefSeq_simulated	47421	Hydrogenophaga_pseudoflava	4905973	4855	3166	0.652111	100	41.7723	9.14563
RefSeq_simulated	47466	Borrelia_miyamotoi	906165	33386	12848	0.384832	99.1835	39.8119	88.3691
RefSeq_simulated	47479	Streptosporangium_album	9022456	11	0	0			0
RefSeq_simulated	47490	Thermoanaerobacterium_aotearoense	2668690	1	1	1	98.6667	42	0.00565821
RefSeq_simulated	47492	Xanthobacter_agilis	4827619	6	0	0			0
RefSeq_simulated	47493	Limosilactobacillus_panis	2006512	3308	1658	0.501209	99.9903	41.8945	11.6877
RefSeq_simulated	47500	Aneurinibacillus_migulanus	6348994	96260	47730	0.495845	99.9426	41.0463	67.5971
RefSeq_simulated	47589	Rickettsia_peacockii	1314898	48	34	0.708333	97.6275	34.9412	0.280858
RefSeq_simulated	47678	Bacteroides_caccae	5499725	1494171	679941	0.455062	99.6371	41.3972	79.9135
RefSeq_simulated	47679	Sporomusa_sphaeroides	5015343	2763	1564	0.566051	99.9923	41.2372	4.57032
RefSeq_simulated	47715	Lacticaseibacillus_rhamnosus	2941522	2593952	1142506	0.44045	98.2761	36.5557	99.1318
RefSeq_simulated	47716	Streptomyces_olivaceus	8458055	177	5	0.0282486	96.0044	19.8	0.00435088
RefSeq_simulated	47735	Bibersteinia_trehalosi	2340975	83892	39038	0.465336	99.3772	39.7215	90.0695
RefSeq_simulated	47758	Streptomyces_sulphureus	7104952	61	0	0			0
RefSeq_simulated	47759	Streptomyces_tubercidicus	8284047	174	3	0.0172414	94.9021	15.3333	0.00405599
RefSeq_simulated	47760	Streptomyces_aurantiacus	9428393	127	0	0			0
RefSeq_simulated	47761	Streptomyces_ochraceiscleroticus	8408570	124	13	0.104839	93.4359	3	0.00305641
RefSeq_simulated	47763	Streptomyces_lydicus	8243179	18850	10699	0.567586	99.4457	41.0789	17.578
RefSeq_simulated	47770	Lactobacillus_crispatus	2039404	269369	121546	0.451225	98.9493	38.8615	85.5187
RefSeq_simulated	47834	Spiroplasma_kunkelii	1514561	160	52	0.325	95.3876	16.9038	0.383081
RefSeq_simulated	47835	Spiroplasma_phoeniceum	1908276	220	61	0.277273	95.4416	18.6557	0.361373
RefSeq_simulated	47839	Mycobacterium_triplex	6366285	20	2	0.1	99.6667	42	0.00474374
RefSeq_simulated	47845	Brachybacterium_alimentarium	3982721	26191	15681	0.598717	99.2174	40.5549	39.3831
RefSeq_simulated	47847	Brachybacterium_nesterenkovii	3021972	3	0	0			0
RefSeq_simulated	47848	Brachybacterium_tyrofermentans	4407399	60	3	0.05	97.1111	29.3333	0.00741934
RefSeq_simulated	47850	Micromonospora_aurantiaca	7025559	55606	34020	0.611804	98.7841	39.2521	41.1759
RefSeq_simulated	47853	Micromonospora_carbonacea	7528335	13	0	0			0
RefSeq_simulated	47854	Micromonospora_chersina	6683691	35	3	0.0857143	94	9.66667	0.00593983
RefSeq_simulated	47855	Micromonospora_citrea	7208999	52	11	0.211538	94.7879	13.2727	0.013386
RefSeq_simulated	47857	Micromonospora_echinaurantiaca	7203233	18	2	0.111111	94	5.5	0.00236005
RefSeq_simulated	47858	Micromonospora_echinofusca	7002627	66	7	0.106061	95.1429	17.2857	0.00878242
RefSeq_simulated	47860	Micromonospora_fulviviridis	6976653	51	0	0			0
RefSeq_simulated	47863	Micromonospora_globosa	6862505	352	297	0.84375	98.9029	40.202	0.446411
RefSeq_simulated	47864	Micromonospora_halophytica	6275885	40	4	0.1	96.5	24	0.00962414
RefSeq_simulated	47865	Micromonospora_inositola	6708094	25	0	0			0
RefSeq_simulated	47866	Micromonospora_inyonensis	6923970	73	24	0.328767	95.1389	15.5833	0.0375507
RefSeq_simulated	47871	Micromonospora_peucetia	7365767	19	1	0.0526316	94	3	0.00205002
RefSeq_simulated	47872	Micromonospora_purpureochromogenes	6674234	128	5	0.0390625	93.6	7.8	0.00770126
RefSeq_simulated	47874	Micromonospora_rosaria	7383286	16	0	0			0
RefSeq_simulated	47875	Micromonospora_sagamiensis	6930736	93	14	0.150538	96.3333	26.7143	0.026837
RefSeq_simulated	47877	Pseudomonas_amygdali	6201720	195800	117543	0.600322	98.6349	38.1208	81.1682
RefSeq_simulated	47878	Pseudomonas_azotoformans	6727386	455	252	0.553846	99.66	39.9603	0.544045
RefSeq_simulated	47879	Pseudomonas_corrugata	6124363	118361	62734	0.530023	99.7045	41.257	75.1901
RefSeq_simulated	47880	Pseudomonas_fulva	5398139	8345	5102	0.611384	99.1202	40.5194	11.9465
RefSeq_simulated	47882	Pseudomonas_straminea	4992198	199	136	0.683417	100	41.6471	0.411362
RefSeq_simulated	47883	Pseudomonas_synxantha	6562330	190824	95690	0.501457	97.4919	32.1088	72.1112
RefSeq_simulated	47884	Pseudomonas_taetrolens	4843871	348	101	0.29023	98.6073	34.4257	0.242946
RefSeq_simulated	47885	Pseudomonas_oryzihabitans	4986278	247	32	0.129555	94.8333	13.2188	0.0446024
RefSeq_simulated	47886	Pseudomonas_luteola	5901383	22644	11945	0.527513	97.9103	35.116	23.5577
RefSeq_simulated	47917	Serratia_fonticola	6000511	137281	72758	0.529993	98.0977	33.3638	78.0314
RefSeq_simulated	47920	Acidovorax_delafieldii	5022177	19	0	0			0
RefSeq_simulated	47951	Vibrio_cyclitrophicus	5074401	187185	102080	0.545343	98.9918	39.3012	72.4022
RefSeq_simulated	47958	Methylorubrum_thiocyanatum	5637136	39	16	0.410256	98.0417	35.875	0.0402509
RefSeq_simulated	47988	Actinoplanes_auranticolor	9878734	5	0	0			0
RefSeq_simulated	47989	Dactylosporangium_roseum	8220997	5	0	0			0
RefSeq_simulated	47994	Leptothrix_mobilis	4651965	18	0	0			0
RefSeq_simulated	48003	Mycoplasmopsis_pullorum	953874	1465	541	0.369283	99.9803	41.5194	8.08482
RefSeq_simulated	48221	Carnobacterium_sp.	2975878	2	0	0			0
RefSeq_simulated	48256	Ruminiclostridium_hungatei	4901053	2	0	0			0
RefSeq_simulated	48292	Hyphomicrobium_zavarzinii	4651795	1	0	0			0
RefSeq_simulated	48296	Acinetobacter_pittii	3862530	528948	307386	0.581127	98.0273	33.9676	96.6764
RefSeq_simulated	48664	Xanthomonas_fragariae	4328441	527741	266062	0.504153	99.9355	40.4177	97.8596
RefSeq_simulated	48727	Halomonas_pantelleriensis	4402189	3947	1994	0.505194	99.9977	41.8526	6.62732
RefSeq_simulated	48782	Leptospira_fainei	4287324	270	0	0			0
RefSeq_simulated	48935	Novosphingobium_aromaticivorans	4233314	1	0	0			0
RefSeq_simulated	48936	Novosphingobium_subterraneum	4700166	40	28	0.7	100	42	0.0899543
RefSeq_simulated	49186	Marinobacterium_stanieri	4680330	528	235	0.445076	98.9418	37.9404	0.756101
RefSeq_simulated	49278	Psychroserpens_burtonensis	3976448	3	1	0.333333	95.3333	23	0.00379736
RefSeq_simulated	49280	Gelidibacter_algens	4459459	7	0	0			0
RefSeq_simulated	49283	Paenibacillus_thiaminolyticus	6612542	305654	116492	0.381124	97.2982	31.6299	81.2805
RefSeq_simulated	49319	Rubrobacter_xylanophilus	3225748	1	0	0			0
RefSeq_simulated	49338	Desulfitobacterium_hafniense	5279134	119424	54673	0.457806	98.8324	38.0397	66.3453
RefSeq_simulated	49447	Halochromatium_salexigens	3828867	4	0	0			0
RefSeq_simulated	49547	Methanobrevibacter_curvatus	2414608	14	0	0			0
RefSeq_simulated	49893	Holospora_obtusa	1334837	1	0	0			0
RefSeq_simulated	49897	Mycobacterium_hodleri	6529154	3	0	0			0
RefSeq_simulated	50052	Mycoplasma_crocodyli	934379	83	43	0.518072	100	41.0465	0.6949
RefSeq_simulated	50338	Rhizobium_sullae	7595929	141801	64982	0.458262	99.3395	40.1788	70.836
RefSeq_simulated	50712	Blastochloris_sulfoviridis	3845334	3	1	0.333333	94.6667	8	0.00392684
RefSeq_simulated	50715	Acidisphaera_rubrifaciens	3862273	1	0	0			0
RefSeq_simulated	50718	Vibrio_mytili	4479466	611	61	0.0998363	95.0576	15.2951	0.0277265
RefSeq_simulated	50719	Vibrio_diabolicus	5108924	117370	83877	0.714637	98.1096	36.2655	68.1125
RefSeq_simulated	50960	Helicobacter_trogontum	2446321	9811	3998	0.407502	98.3348	37.6593	21.172
RefSeq_simulated	51047	Actinobacillus_minor	2425264	112	12	0.107143	95.7222	20.5833	0.0482009
RefSeq_simulated	51048	Actinobacillus_porcinus	2276241	33	5	0.151515	95.4728	17.4	0.0193301
RefSeq_simulated	51049	Actinobacillus_indolicus	2251645	320	79	0.246875	96.7186	21.1013	0.191549
RefSeq_simulated	51101	Brevibacillus_agri	5374818	10298	7808	0.758205	99.9994	40.8941	18.5132
RefSeq_simulated	51160	Treponema_maltophilum	2530388	24	12	0.5	96.7222	30.0833	0.0456452
RefSeq_simulated	51161	Actinobacillus_delphinicola	1837244	75	0	0			0
RefSeq_simulated	51173	Ureibacillus_thermosphaericus	3488104	355	169	0.476056	99.0613	2.39053	0.0791834
RefSeq_simulated	51201	Streptomyces_griseocarneus	7375626	45	3	0.0666667	94.1176	4.66667	0.00222354
RefSeq_simulated	51203	Methanohalophilus_euhalobius	1978025	5	3	0.6	96.2222	23.3333	0.0164811
RefSeq_simulated	51288	Kluyvera_ascorbata	5062542	31416	14021	0.446301	98.4508	38.3836	32.5343
RefSeq_simulated	51363	Metamycoplasma_auris	750874	20	2	0.1	96.3333	24	0.0356917
RefSeq_simulated	51364	Mycoplasma_cottewii	1016659	1	0	0			0
RefSeq_simulated	51365	Mycoplasma_yeatsii	895051	28	0	0			0
RefSeq_simulated	51367	Salinivibrio_costicola	3381657	97	13	0.134021	95.4434	17.6154	0.0161164
RefSeq_simulated	51515	Dehalobacterium_formicoaceticum	3766545	1	0	0			0
RefSeq_simulated	51589	Haloarcula_hispanica	3890005	5605	3225	0.575379	98.5411	37.1262	10.5512
RefSeq_simulated	51616	Desulfitobacterium_chlororespirans	5606984	491	281	0.572301	96.4305	26.306	0.514091
RefSeq_simulated	51642	Nitrosomonas_mobilis	3082864	3	2	0.666667	95.3333	23	0.00979609
RefSeq_simulated	51663	Pediococcus_damnosus	2173661	488548	238515	0.488212	99.8948	40.362	96.4261
RefSeq_simulated	51664	Lapidilactobacillus_dextrinicus	1836976	1	0	0			0
RefSeq_simulated	51665	Aerococcus_urinaeequi	2013339	86	10	0.116279	97.6667	37.2	0.0615892
RefSeq_simulated	51669	Tetragenococcus_halophilus	2389470	201758	80447	0.39873	98.8406	36.6095	92.4597
RefSeq_simulated	52021	Halomonas_desiderata	4737211	8	4	0.5	94.5	12.25	0.0126024
RefSeq_simulated	52022	Meiothermus_silvanus	3721669	1	0	0			0
RefSeq_simulated	52023	Calidithermus_chliarophilus	4688964	7060	3784	0.535977	99.9986	41.4841	11.4162
RefSeq_simulated	52131	Rhizobium_hainanense	7252624	27493	14064	0.511548	100	41.8885	25.3766
RefSeq_simulated	52133	Acinetobacter_venetianus	3458264	433683	199694	0.460461	97.5538	33.0054	89.4825
RefSeq_simulated	52226	Mitsuokella_multacida	2577056	539	196	0.363636	97.7484	34.4133	1.14549
RefSeq_simulated	52227	Prevotella_dentalis	3350206	1	0	0			0
RefSeq_simulated	52242	Lactobacillus_gallinarum	2020091	3274	1744	0.532682	99.3588	39.9685	11.28
RefSeq_simulated	52259	Streptomyces_humidus	9711080	39	1	0.025641	98	40	0.00155492
RefSeq_simulated	52443	Vibrio_tapetis	5198666	252	1	0.00396825	93.3333	3	0.00290459
RefSeq_simulated	52560	Desulfomicrobium_apsheronum	4254075	2	0	0			0
RefSeq_simulated	52561	Desulfomicrobium_norvegicum	4352996	112	74	0.660714	100	41.9054	0.256697
RefSeq_simulated	52584	Brachyspira_pilosicoli	2586443	47306	21055	0.445081	99.0072	39.7312	68.1747
RefSeq_simulated	52603	Sagittula_stellata	5290610	9	0	0			0
RefSeq_simulated	52689	Acetobacterium_bakii	4319181	2628	1311	0.498858	99.9995	41.1732	4.43878
RefSeq_simulated	52691	Acetobacterium_fimetarium	3237487	2	1	0.5	96	23	0.00466411
RefSeq_simulated	52692	Acetobacterium_malicum	4077227	33	33	1	98.9899	40.6364	0.120229
RefSeq_simulated	52693	Acetobacterium_paludosum	3691131	1	0	0			0
RefSeq_simulated	52694	Acetobacterium_wieringae	3711234	28	2	0.0714286	97	31.5	0.00813746
RefSeq_simulated	52695	Actinoplanes_brasiliensis	9750342	3	1	0.333333	96	23	0.00154866
RefSeq_simulated	52696	Actinoplanes_cyaneus	10358347	5	0	0			0
RefSeq_simulated	52697	Actinoplanes_regularis	10031706	19	0	0			0
RefSeq_simulated	52698	Saccharomonospora_iraqiensis	4669397	1	0	0			0
RefSeq_simulated	52699	Aeromicrobium_fastidiosum	3925785	20	0	0			0
RefSeq_simulated	52704	Clostridium_vincentii	3505833	280	1	0.00357143	93.3333	3	0.00430711
RefSeq_simulated	52764	Bartonella_alsatica	1659117	45	0	0			0
RefSeq_simulated	52767	Actinomyces_denticolens	2877863	2424	1753	0.723185	99.2972	40.3297	8.07735
RefSeq_simulated	52768	Schaalia_georgiae	2498023	3	0	0			0
RefSeq_simulated	52769	Actinomyces_gerencseriae	3420019	73	34	0.465753	100	40.7941	0.150116
RefSeq_simulated	52770	Buchananella_hordeovulneris	2521171	19578	9191	0.469456	99.2594	40.6728	41.5468
RefSeq_simulated	52771	Actinomyces_howellii	3148934	9	1	0.111111	94.6667	8	0.00479527
RefSeq_simulated	52773	Schaalia_meyeri	2033037	1683	841	0.499703	99.9749	41.4459	6.04441
RefSeq_simulated	52774	Actinomyces_slackii	3220508	6	0	0			0
RefSeq_simulated	53254	Bosea_thiooxidans	5369373	5679	2879	0.506955	100	41.8156	7.75394
RefSeq_simulated	53336	Tatumella_citrea	4491252	5	5	1	96.2667	29.8	0.0113109
RefSeq_simulated	53341	Xenorhabdus_japonica	3561198	5	0	0			0
RefSeq_simulated	53342	Caloramator_proteoclasticus	2655018	2	0	0			0
RefSeq_simulated	53343	Desulforamulus_aeronauticus	4020963	711	356	0.500703	100	40.5983	1.32747
RefSeq_simulated	53344	Staphylococcus_delphini	2616750	832723	359250	0.431416	98.2875	37.1955	92.9835
RefSeq_simulated	53345	Enterococcus_durans	2988928	292714	169657	0.5796	98.7104	38.9498	88.3661
RefSeq_simulated	53346	Enterococcus_mundtii	3504528	323095	138802	0.429601	97.2582	31.0249	80.4592
RefSeq_simulated	53356	Terracoccus_luteus	4023595	4	0	0			0
RefSeq_simulated	53358	Intrasporangium_calvum	4024382	564	263	0.466312	99.5519	41.1673	0.983704
RefSeq_simulated	53359	Dactylosporangium_fulvum	10494953	7	0	0			0
RefSeq_simulated	53360	Dactylosporangium_matsuzakiense	11766240	9	0	0			0
RefSeq_simulated	53362	Dactylosporangium_vinaceum	11959907	103	0	0			0
RefSeq_simulated	53363	Brevibacterium_mcbrellneri	2561804	9219	4672	0.506779	100	41.9403	23.9483
RefSeq_simulated	53366	Catellatospora_citrea	9360966	1	0	0			0
RefSeq_simulated	53367	Asanoa_ferruginea	9071909	23	0	0			0
RefSeq_simulated	53368	Hamadaea_tsunoensis	9478888	26	0	0			0
RefSeq_simulated	53371	Pilimelia_anulata	5160904	1	0	0			0
RefSeq_simulated	53372	Pilimelia_terevasa	4535755	15	0	0			0
RefSeq_simulated	53374	Corynebacterium_coyleae	2510261	568	432	0.760563	99.909	40.4606	2.53579
RefSeq_simulated	53376	Mycobacterium_heidelbergense	5050576	80	0	0			0
RefSeq_simulated	53378	Mycobacterium_paraffinicum	5402488	67	4	0.0597015	92.6886	4	0.011069
RefSeq_simulated	53388	Microlunatus_antarcticus	4369610	2	0	0			0
RefSeq_simulated	53399	Hyphomicrobium_denitrificans	3638969	2	0	0			0
RefSeq_simulated	53406	Pseudomonas_anguilliseptica	5229617	2	0	0			0
RefSeq_simulated	53407	Pseudomonas_asplenii	6529636	61	1	0.0163934	99.3333	42	0.00231253
RefSeq_simulated	53408	Pseudomonas_citronellolis	6951444	17674	9491	0.537004	98.1117	35.9205	17.8007
RefSeq_simulated	53409	Pseudomonas_coronafaciens	5714458	184317	101590	0.55117	98.8117	39.7056	69.2127
RefSeq_simulated	53410	Pseudomonas_ficuserectae	6456568	250	173	0.692	97.835	33.0751	0.121349
RefSeq_simulated	53412	Pseudomonas_resinovorans	6027681	77	35	0.454545	100	41.6857	0.0876788
RefSeq_simulated	53413	Xanthomonas_axonopodis	4919079	6559	3914	0.596737	96.6343	26.1275	1.81873
RefSeq_simulated	53414	Xanthomonas_populi	4338173	570	126	0.221053	95.2281	15.4841	0.128211
RefSeq_simulated	53417	Lonepinella_koalarum	2550855	21	0	0			0
RefSeq_simulated	53419	Treponema_socranskii	2805741	656	113	0.172256	96.5944	26.9646	0.608395
RefSeq_simulated	53422	Thermobrachium_celere	2644756	2	0	0			0
RefSeq_simulated	53424	Thermodesulfobacterium_hveragerdense	1729593	5	0	0			0
RefSeq_simulated	53428	Nocardia_crassostreae	8293148	12	0	0			0
RefSeq_simulated	53429	Nocardia_flavorosea	7440171	2	0	0			0
RefSeq_simulated	53431	Nocardia_salmonicida	7414253	138531	75183	0.542716	98.0009	36.3671	64.0436
RefSeq_simulated	53432	Nocardia_uniformis	8766665	6	0	0			0
RefSeq_simulated	53435	Treponema_paraluiscuniculi	1133390	125	83	0.664	99.1245	41.1807	0.502828
RefSeq_simulated	53437	Nocardiopsis_alba	5861114	22120	11150	0.504069	100	41.8334	24.9517
RefSeq_simulated	53440	Nocardiopsis_listeri	5685516	5	0	0			0
RefSeq_simulated	53441	Nocardiopsis_lucentensis	6325274	8	0	0			0
RefSeq_simulated	53442	Eubacterium_callanderi	4316707	2127	1268	0.596145	99.8786	41.3651	4.26267
RefSeq_simulated	53443	Blautia_hydrogenotrophica	3597785	18	0	0			0
RefSeq_simulated	53444	Fructilactobacillus_lindneri	1389742	28682	14497	0.505439	100	40.8806	78.7343
RefSeq_simulated	53446	Streptomyces_cinnamoneus	6662690	126	0	0			0
RefSeq_simulated	53448	Streptomyces_gougerotii	6721603	103	58	0.563107	96.2874	25.4138	0.0142823
RefSeq_simulated	53450	Streptomyces_odorifer	6818716	4	2	0.5	99	42	0.00442899
RefSeq_simulated	53451	Streptomyces_rutgersensis	6996347	116	37	0.318966	96.2557	24.1622	0.0381485
RefSeq_simulated	53458	Janibacter_limosus	3378259	3	0	0			0
RefSeq_simulated	53461	Nakamurella_multipartita	6060298	5	0	0			0
RefSeq_simulated	53462	Mycolicibacterium_mageritense	8006721	928	456	0.491379	99.9985	41.4649	0.856455
RefSeq_simulated	53463	Paracoccus_solventivorans	3377602	13	2	0.153846	96	23	0.00491473
RefSeq_simulated	53483	Polaribacter_filamentus	4281931	8	0	0			0
RefSeq_simulated	53522	Thermobifida_alba	4903256	4	0	0			0
RefSeq_simulated	53558	Mycoplasmopsis_edwardii	832213	23	9	0.391304	96.963	27.4444	0.136023
RefSeq_simulated	53635	Acidimicrobium_ferrooxidans	2158157	4	0	0			0
RefSeq_simulated	53952	Thermococcus_peptonophilus	1896106	473	239	0.505285	100	42	1.90163
RefSeq_simulated	53972	Rhodococcus_corynebacterioides	3977374	929	461	0.496233	99.9119	41.5683	1.73874
RefSeq_simulated	54005	Peptoniphilus_harei	1929566	73	39	0.534247	98.7179	17.2564	0.221967
RefSeq_simulated	54006	Peptoniphilus_ivorii	1621107	19	2	0.105263	95.6667	23	0.00956137
RefSeq_simulated	54007	Anaerococcus_octavius	1914290	14927	7478	0.500971	99.8725	40.9484	44.2411
RefSeq_simulated	54010	Pseudonocardia_asaccharolytica	5056835	1	0	0			0
RefSeq_simulated	54011	Pseudonocardia_sulfidoxydans	6576285	19	0	0			0
RefSeq_simulated	54062	Pediococcus_parvulus	2163309	507	217	0.428008	99.6529	41.1475	1.48735
RefSeq_simulated	54067	Xylophilus_ampelinus	3731505	7	0	0			0
RefSeq_simulated	54076	Thermococcus_zilligii	1764559	398	199	0.5	100	41.9497	1.68376
RefSeq_simulated	54120	Methanolacinia_petrolearia	2843290	2	0	0			0
RefSeq_simulated	54121	Halanaerobium_congolense	2831374	212366	81152	0.382133	99.4646	40.2389	81.2985
RefSeq_simulated	54259	Ignicoccus_islandicus	1394664	24861	12433	0.500101	100	41.9227	73.6937
RefSeq_simulated	54265	Carboxydothermus_ferrireducens	2441992	4	1	0.25	96.6667	24	0.00618348
RefSeq_simulated	54291	Raoultella_ornithinolytica	5952440	198887	152845	0.768502	99.3537	41.2768	69.376
RefSeq_simulated	54294	Thermosyntropha_lipolytica	2169229	1538	769	0.5	100	41.6385	5.23942
RefSeq_simulated	54306	Planktothrix_mougeotii	6226999	16	2	0.125	94.3333	13	0.00484985
RefSeq_simulated	54307	Planktothrix_prolifica	5737366	11	11	1	99.1519	38.9091	0.0252032
RefSeq_simulated	54311	Spirulina_subsalsa	5323600	2	0	0			0
RefSeq_simulated	54313	Tychonema_bourrellyi	5081867	5	0	0			0
RefSeq_simulated	54571	Streptomyces_venezuelae	8223505	1525	801	0.525246	99.8818	41.2871	1.39483
RefSeq_simulated	54736	Salmonella_bongori	4460105	299464	145759	0.486733	99.4339	40.9811	94.7764
RefSeq_simulated	54767	Oceanidesulfovibrio_indonesiensis	4286425	1	1	1	97.3333	40	0.00352275
RefSeq_simulated	54910	Brevibacillus_centrosporus	6242354	12	0	0			0
RefSeq_simulated	54911	Brevibacillus_choshinensis	6279095	25	2	0.08	95.3333	23	0.00242073
RefSeq_simulated	54913	Brevibacillus_formosus	6215362	2618	1261	0.481665	98.1971	34.2189	2.99386
RefSeq_simulated	54914	Brevibacillus_parabrevis	6088079	11	0	0			0
RefSeq_simulated	54915	Brevibacillus_reuszeri	6986486	78	2	0.025641	94.3333	5.5	0.00432263
RefSeq_simulated	55085	Streptococcus_thoraltensis	2385218	115	2	0.0173913	93.3333	3	0.00674991
RefSeq_simulated	55148	Deinococcus_proteolyticus	2886836	7988	4025	0.503881	100	41.2467	18.9998
RefSeq_simulated	55197	Flavobacterium_branchiophilum	3563292	235	13	0.0553191	95.8184	26.3077	0.0157439
RefSeq_simulated	55205	Caldicellulosiruptor_owensensis	2428903	7	2	0.285714	96.3532	5	0.0124748
RefSeq_simulated	55207	Pectobacterium_betavasculorum	4685213	5537	2627	0.474445	99.1194	38.7244	7.14531
RefSeq_simulated	55208	Pectobacterium_wasabiae	5043228	1926	926	0.480789	99.3575	38.378	2.46814
RefSeq_simulated	55209	Pantoea_cypripedii	6553825	2786	1337	0.479899	100	41.6485	3.04065
RefSeq_simulated	55211	Erwinia_persicina	4802925	37816	17268	0.456632	99.5432	41.1982	41.3688
RefSeq_simulated	55212	Erwinia_rhapontici	5164665	51	23	0.45098	95.8411	17.6957	0.0125662
RefSeq_simulated	55213	Brenneria_rubrifaciens	4133520	12	7	0.583333	97.3333	30.5714	0.0146848
RefSeq_simulated	55214	Brenneria_salicis	4045881	29	9	0.310345	96.3704	14.3333	0.0197732
RefSeq_simulated	55395	Bradyrhizobium_sp._NC92	8355732	400	187	0.4675	96.5215	25.7487	0.0372798
RefSeq_simulated	55404	Streptomyces_netropsis	8144008	44	1	0.0227273	96	23	0.00185412
RefSeq_simulated	55504	Sporomusa_silvacetica	6046356	1	0	0			0
RefSeq_simulated	55508	Janthinobacterium_agaricidamnosum	5949001	21	0	0			0
RefSeq_simulated	55518	Magnetospirillum_gryphiswaldense	4365796	1023	515	0.503421	99.9909	40.5709	1.77629
RefSeq_simulated	55565	Actinomyces_graevenitzii	2205725	3	0	0			0
RefSeq_simulated	55601	Vibrio_anguillarum	4175625	325147	208199	0.640323	98.9758	39.6016	81.6007
RefSeq_simulated	55603	Mycoplasmopsis_caviae	1155014	2	0	0			0
RefSeq_simulated	55604	Mycoplasmopsis_primatum	902769	2	0	0			0
RefSeq_simulated	55758	Methanobrevibacter_filiformis	2606143	15	0	0			0
RefSeq_simulated	55779	Moorella_glycerini	3559563	9	3	0.333333	96.6667	29	0.00584341
RefSeq_simulated	55952	Streptomyces_toyocaensis	7341014	10	0	0			0
RefSeq_simulated	55969	Leucobacter_komagatae	3752337	11	0	0			0
RefSeq_simulated	56055	Bogoriella_caseilytica	3235396	2	0	0			0
RefSeq_simulated	56192	Photobacterium_iliopiscarium	4308695	435	66	0.151724	96.1212	22.1667	0.0875439
RefSeq_simulated	56193	Sphingobium_chungbukense	5516495	1	1	1	94	3	0.00273725
RefSeq_simulated	56361	Sphingomonas_ursincola	3807031	1	0	0			0
RefSeq_simulated	56425	Mycobacterium_bohemicum	5420516	17	0	0			0
RefSeq_simulated	56426	Bartonella_clarridgeiae	1522743	50	24	0.48	100	42	0.237992
RefSeq_simulated	56438	Couchioplanes_caeruleus	8428293	39	0	0			0
RefSeq_simulated	56448	Xanthomonas_arboricola	4997863	3281534	1769138	0.539119	97.5206	33.5479	97.9459
RefSeq_simulated	56449	Xanthomonas_bromi	4841335	1003	325	0.324028	95.223	16.0492	0.178628
RefSeq_simulated	56450	Xanthomonas_cassavae	5270756	42684	23490	0.550323	99.9703	41.1989	47.8411
RefSeq_simulated	56453	Xanthomonas_cucurbitae	4615492	624	137	0.219551	95.8689	20.9124	0.0736866
RefSeq_simulated	56454	Xanthomonas_hortorum	5250904	351486	196004	0.557644	99.9339	41.1195	93.4382
RefSeq_simulated	56455	Xanthomonas_hyacinthi	4963026	434	153	0.352535	96.3164	24.9739	0.215836
RefSeq_simulated	56456	Xanthomonas_melonis	4675418	530	54	0.101887	95.9877	21.5926	0.0511826
RefSeq_simulated	56457	Xanthomonas_pisi	5327500	246	55	0.223577	96.1576	24.0364	0.0578132
RefSeq_simulated	56458	Xanthomonas_sacchari	4957212	90	20	0.222222	94.5	9.25	0.0193254
RefSeq_simulated	56459	Xanthomonas_vasicola	4837576	1886761	959488	0.508537	99.8022	41.2387	99.231
RefSeq_simulated	56460	Xanthomonas_vesicatoria	5349905	656574	329719	0.502181	99.2595	40.0993	90.9564
RefSeq_simulated	56463	Xanthomonas_codiaei	5043310	975	255	0.261538	95.3248	16.6902	0.14665
RefSeq_simulated	56464	Xanthomonas_theicola	4785596	1821	810	0.444811	99.6	39.2494	2.4202
RefSeq_simulated	56689	Mycolicibacterium_mucogenicum	6099273	8196	2046	0.249634	95.7741	20.3167	4.67607
RefSeq_simulated	56698	Sulfurospirillum_arsenophilum	2629984	2	0	0			0
RefSeq_simulated	56730	Rhizobium_gallicum	7311190	54	3	0.0555556	95.1111	11.6667	0.0028176
RefSeq_simulated	56731	Rhizobium_giardinii	6569494	34	21	0.617647	96.5434	25.9524	0.0135322
RefSeq_simulated	56779	Halanaerobium_kushneri	3222148	50	14	0.28	97.7143	25.2143	0.0351629
RefSeq_simulated	56804	Glaciecola_punicea	3201741	16993	8478	0.498911	100	41.9151	32.8618
RefSeq_simulated	56807	Glaciecola_pallidula	4363047	6	0	0			0
RefSeq_simulated	56810	Psychrobacter_glacincola	3247549	2	0	0			0
RefSeq_simulated	56812	Shewanella_frigidimarina	4845257	67005	38743	0.578211	98.7502	38.3353	61.2062
RefSeq_simulated	56813	Shewanella_gelidimarina	5033801	6	0	0			0
RefSeq_simulated	56877	Helicobacter_bizzozeronii	1787261	13519	5729	0.423774	98.5032	35.7834	37.8797
RefSeq_simulated	56878	Helicobacter_salomonis	1578399	23	2	0.0869565	93.3333	3	0.0188165
RefSeq_simulated	56946	Afipia_broomeae	5261968	1	0	0			0
RefSeq_simulated	56956	Thermus_brockianus	2423923	42	5	0.119048	97.7333	34.4	0.0203389
RefSeq_simulated	56957	Thermus_oshimai	2401329	60119	30182	0.502038	99.9389	41.4698	84.0161
RefSeq_simulated	57001	Amaricoccus_macauensis	4829273	3	0	0			0
RefSeq_simulated	57028	Algoriphagus_ratkowskyi	4994706	3	0	0			0
RefSeq_simulated	57029	Psychroflexus_torquis	4321832	14	11	0.785714	97.9394	36.3636	0.0384328
RefSeq_simulated	57037	Lacticaseibacillus_zeae	3046355	8094	3553	0.438967	97.6354	32.9513	15.1144
RefSeq_simulated	57043	Microbacterium_esteraromaticum	3239725	41	0	0			0
RefSeq_simulated	57480	Microvirgula_aerodenitrificans	4127211	274	205	0.748175	99.9902	41.0732	0.746461
RefSeq_simulated	57487	Pseudothermotoga_hypogea	2165165	214	107	0.5	100	41.5234	0.74544
RefSeq_simulated	57497	Deinococcus_radiopugnans	3531443	20	0	0			0
RefSeq_simulated	57664	Desulfuromonas_thiophila	2899047	13301	6129	0.460792	99.4365	40.6802	26.7128
RefSeq_simulated	57666	Sulfurospirillum_arcachonense	2656384	1	0	0			0
RefSeq_simulated	57676	Rhizobium_mongolense	6728492	60	0	0			0
RefSeq_simulated	57704	Tsukamurella_tyrosinosolvens	4840603	22856	11475	0.502056	99.7708	41.5728	29.871
RefSeq_simulated	57706	Citrobacter_braakii	4917491	230744	149268	0.646899	98.625	39.6001	61.1816
RefSeq_simulated	57732	Enterococcus_asini	2572706	6680	2704	0.40479	98.1389	34.595	14.4121
RefSeq_simulated	57863	Borreliella_turdi	1009219	2234	546	0.244405	95.0324	14.7821	2.5056
RefSeq_simulated	57911	Candidatus_Arsenophonus_triatominarum	3858720	1	0	0			0
RefSeq_simulated	57975	Burkholderia_thailandensis	6723972	2123826	1053765	0.496164	99.4088	40.5924	96.6816
RefSeq_simulated	58051	Moritella_sp._PE36	5223088	48	2	0.0416667	96.6667	31.5	0.00578202
RefSeq_simulated	58109	Actinocorallia_herbida	9800715	4	0	0			0
[truncated: 360,075+ more rows]
